# Supplementary material for: Synthesis, In Silico and In Vitro Evaluation of Some Flavone Derivatives for Acetylcholinesterase and BACE-1 Inhibitory Activity
Source: PubMed Central journal article supplement (PMC7570966; doi:10.3390/molecules25184064), 2020-09-05
Supplement: molecules-25-04064-s001.pdf [file molecules-25-04064-s001.pdf]

## SUPPORTING INFORMATION

# Synthesis, In Silico and In Vitro Evaluation of Some Flavone Derivatives for Acetylcholinesterase and BACE-1 Inhibitory Activity

Thai-Son Tran <sup>1,2</sup>, Thanh-Dao Tran <sup>1</sup>, The-Huan Tran <sup>2</sup>, Thanh-Tan Mai <sup>1</sup>, Ngoc-Le Nguyen <sup>3</sup>, Khac-Minh Thai <sup>1,\*</sup> and Minh-Tri Le <sup>1,4,\*</sup>

<sup>1</sup> Department of Medicinal Chemistry, Faculty of Pharmacy, University of Medicine and Pharmacy at Ho Chi Minh City, Ho Chi Minh City 700000, Vietnam; tson@huemed-univ.edu.vn ([T.-S.T.](mailto:T.-S.T.)); tranthanhdao@uphcm.edu.vn (T.-D.T.); mthtan@ump.edu.vn (T.-T.M.)

<sup>2</sup> Department of Pharmaceutical Chemistry, Faculty of Pharmacy, College of Medicine and Pharmacy, Hue University, Hue City 530000, Vietnam; tthuan@hueuni.edu.vn

<sup>3</sup> Department of Pharmaceutics and Industrial Pharmacy, Faculty of Pharmacy, South Can Tho University, Can Tho City 640000, Vietnam; dsngocle1984@gmail.com

<sup>4</sup> School of Medicine, Vietnam National University Ho Chi Minh City, Ho Chi Minh City 700000, Vietnam

\* Correspondence: leminhtri@ump.edu.vn (M.-T.L.); thaikhacminh@gmail.com or thaikhacminh@uphcm.edu.vn (K.-M.T.); Tel.: +84-28-3855-2225 or +84-909-680-385 (K.-M.T.); +84-903-718-190 (M.-T.L.); Fax: +84-28-3822-5435 (K.-M.T.)

**Table S1.** Selected descriptors used for building 2D-QSAR models reported in the previous published work

**Table S2.** Values of selected descriptors used in the prediction of pIC<sub>50</sub> of the synthesized flavone derivatives (AChE)

**Table S3.** Values of selected descriptors used in the prediction of pIC<sub>50</sub> of the synthesized flavone derivatives (BACE-1)

**Table S4.** Results of re-docking (RMSD in Å)

**Table S5.** Docking results and ligand interactions (Co-crystallized 1DX6)

**Table S6.** Docking results and ligand interactions (Co-crystallized 6EQM)

**Table S7.** Spectra of the synthesized flavone derivatives

**Table S1.** Selected descriptors used for building 2D-QSAR models reported in the previous published work [1]

| Code                                                    | Category                      | Description                                                                                                                                                                                                                                                                                                |
|---------------------------------------------------------|-------------------------------|------------------------------------------------------------------------------------------------------------------------------------------------------------------------------------------------------------------------------------------------------------------------------------------------------------|
| BCUT_SlogP_3                                            | Adjacency and distance matrix | A Burden's parameter using atomic contribution to logP (using the Wildman and Crippen SlogP method [2]) instead of partial charge.                                                                                                                                                                         |
| BCUT_PEOE_1                                             | Adjacency and distance matrix | A descriptor relating topological shape and partial charges                                                                                                                                                                                                                                                |
| petitjean                                               | Adjacency and distance matrix | Value of (diameter - radius) / diameter.                                                                                                                                                                                                                                                                   |
| reactive                                                | Physical property             | An indicator of the presence of reactive groups. A non-zero value indicates that the molecule contains a reactive group. The table of reactive groups is based on the Oprea set [3] and includes metals, phospho-, N/O/S-N/O/S single bonds, thiols, acyl halides, Michael Acceptors, azides, esters, etc. |
| logS                                                    | Physical property             | The log of the aqueous solubility (mol/L).                                                                                                                                                                                                                                                                 |
| PEOE_VSA-0,<br>PEOE_VSA+1,<br>PEOE_VSA-3,<br>PEOE_VSA-6 | Partial charge                | Sum of the proximate accessible <i>van der Waals</i> surface area ( $\text{\AA}^2$ ), $v_i$ , calculation for each atom over all the atoms $i$ , such that partial charge of atom $i$ is in a specified range.                                                                                             |
| SlogP_VSA2,<br>SlogP_VSA3,<br>SlogP_VSA5                | Subdivided surface areas      | Sum of the proximate accessible <i>van der Waals</i> surface area ( $\text{\AA}^2$ ), $v_i$ , calculated for each atom over all the atoms, such that partition coefficient for atom $i$ is in a specified range                                                                                            |
| SMR_VSA2                                                | Subdivided surface areas      | Sum of the proximate accessible <i>van der Waals</i> surface area ( $\text{\AA}^2$ ), $v_i$ , calculation for each atom over all the atoms $i$ , such that molar refractivity for atom $i$ is in a specified range.                                                                                        |
| a_ICM                                                   | Atom counts and bond counts   | The entropy of the element distribution in the molecule (including implicit hydrogens but not lone pair pseudo-atoms)                                                                                                                                                                                      |
| chiral_u                                                | Atom counts and bond counts   | The number of unconstrained chiral centers.                                                                                                                                                                                                                                                                |
| rings                                                   | Atom counts and bond counts   | The number of rings                                                                                                                                                                                                                                                                                        |
| a_Nn                                                    | Atom counts and bond counts   | The number of nitrogen atoms.                                                                                                                                                                                                                                                                              |

**Table S2.** Values of selected descriptors used in the prediction of pIC<sub>50</sub> of the synthesized flavone derivatives (AChE)

| Compound       | BCUT_SLOGP_3 | reactive | PEOE_VSA+1 | PEOE_VSA-3 | SlogP_VSA2 | SMR_VSA2 | Predicted pIC <sub>50</sub> |
|----------------|--------------|----------|------------|------------|------------|----------|-----------------------------|
| B1 (Baicalein) | 2.52         | 1        | 48.98      | 0.00       | 0.00       | 0.00     | <b>4.66</b>                 |
| B2             | 2.53         | 1        | 74.58      | 0.00       | 0.00       | 0.00     | <b>4.59</b>                 |
| B3             | 2.54         | 1        | 95.95      | 0.00       | 0.00       | 0.00     | <b>4.55</b>                 |
| B4             | 2.53         | 1        | 121.54     | 0.00       | 0.00       | 0.00     | <b>4.44</b>                 |
| B5             | 2.54         | 1        | 157.82     | 0.00       | 0.00       | 0.00     | <b>4.32</b>                 |
| B6             | 2.58         | 1        | 183.41     | 0.00       | 0.00       | 0.00     | <b>4.32</b>                 |
| B7             | 2.52         | 1        | 48.98      | 0.00       | 71.59      | 0.00     | <b>4.52</b>                 |
| B8             | 2.54         | 1        | 48.98      | 0.00       | 71.59      | 0.00     | <b>4.56</b>                 |
| D1 (Diosmetin) | 2.49         | 1        | 74.43      | 0.00       | 0.00       | 0.00     | <b>4.50</b>                 |
| D2             | 2.49         | 1        | 100.02     | 0.00       | 0.00       | 0.00     | <b>4.42</b>                 |
| D3             | 2.50         | 1        | 121.40     | 0.00       | 0.00       | 0.00     | <b>4.37</b>                 |
| D4             | 2.50         | 1        | 146.99     | 0.00       | 0.00       | 0.00     | <b>4.26</b>                 |
| D5             | 2.50         | 1        | 112.82     | 0.00       | 0.00       | 0.00     | <b>4.39</b>                 |
| D6             | 2.51         | 1        | 144.88     | 0.00       | 0.00       | 0.00     | <b>4.31</b>                 |
| D7             | 2.49         | 1        | 117.08     | 0.00       | 0.00       | 0.00     | <b>4.35</b>                 |
| Galanthamine   | 2.77         | 0        | 114.49     | 0.00       | 12.94      | 0.00     | <b>5.14</b>                 |

**Table S3.** Values of selected descriptors used in the prediction of pIC<sub>50</sub> of the synthesized chalcone derivatives (BACE-1)

| Compound       | petitjean | BCUT_PEOE_1 | a_ICM | chiral_u | rings | a_nN | PEOE_VSA-0 | PEOE_VSA-6 | logS   | SlogP_VSA3 | SlogP_VSA5 | Predicted pIC <sub>50</sub> |
|----------------|-----------|-------------|-------|----------|-------|------|------------|------------|--------|------------|------------|-----------------------------|
| B1 (Baicalein) | 0.50      | -0.72       | 1.46  | 0        | 3     | 0    | 0.00       | 25.81      | -3.46  | 0.00       | 0.00       | <b>3.66</b>                 |
| B2             | 0.45      | -0.62       | 1.44  | 0        | 3     | 0    | 0.00       | 15.28      | -4.29  | 0.00       | 70.77      | <b>4.82</b>                 |
| B3             | 0.50      | -0.58       | 1.41  | 0        | 3     | 0    | 37.50      | 15.28      | -4.94  | 41.85      | 0.00       | <b>5.11</b>                 |
| B4             | 0.46      | -0.67       | 1.39  | 0        | 3     | 0    | 0.00       | 15.28      | -5.28  | 41.85      | 0.00       | <b>4.35</b>                 |
| B5             | 0.46      | -0.66       | 1.36  | 0        | 3     | 0    | 0.00       | 10.02      | -6.19  | 62.78      | 0.00       | <b>4.60</b>                 |
| B6             | 0.47      | -0.65       | 1.29  | 0        | 6     | 0    | 6.63       | 10.02      | -10.00 | 0.00       | 0.00       | <b>5.18</b>                 |
| B7             | 0.50      | -0.57       | 1.49  | 0        | 3     | 0    | 0.00       | 2.50       | -5.61  | 0.00       | 0.00       | <b>4.73</b>                 |
| B8             | 0.46      | -0.57       | 1.46  | 0        | 3     | 0    | 0.00       | 2.50       | -6.21  | 0.00       | 0.00       | <b>4.75</b>                 |
| D1 (Diosmetin) | 0.45      | -0.87       | 1.48  | 0        | 3     | 0    | 61.27      | 28.31      | -3.51  | 0.00       | 35.38      | <b>3.55</b>                 |
| D2             | 0.50      | -0.60       | 1.46  | 0        | 3     | 0    | 61.27      | 17.78      | -4.34  | 0.00       | 106.15     | <b>5.83</b>                 |
| D3             | 0.46      | -0.56       | 1.43  | 0        | 3     | 0    | 98.77      | 17.78      | -4.99  | 41.85      | 35.38      | <b>6.04</b>                 |
| D4             | 0.47      | -0.66       | 1.42  | 0        | 3     | 0    | 61.27      | 17.78      | -5.33  | 41.85      | 35.38      | <b>5.24</b>                 |
| D5             | 0.50      | -0.59       | 1.44  | 0        | 3     | 0    | 61.27      | 12.52      | -4.75  | 0.00       | 141.54     | <b>6.20</b>                 |
| D6             | 0.46      | -0.56       | 1.40  | 0        | 3     | 0    | 117.52     | 12.52      | -5.73  | 62.78      | 35.38      | <b>6.34</b>                 |
| D7             | 0.47      | -0.65       | 1.42  | 0        | 5     | 0    | 98.04      | 12.78      | -8.47  | 0.00       | 35.38      | <b>6.07</b>                 |
| Umibecestat    | 0.50      | -0.56       | 2.09  | 2        | 3     | 5    | 74.26      | 9.29       | -5.92  | 20.93      | 16.79      | <b>7.67</b>                 |
| Quercetin      | 0.50      | -0.63       | -1.52 | 0        | 3     | 0    | 61.27      | 41.34      | -2.77  | 25.39      | 5.24       | <b>5.24</b>                 |

**Table S4.** Results of re-docking (RMSD in Å)

| <b>Ligand</b> | <b>AChE</b> | <b>BACE-1</b> |
|---------------|-------------|---------------|
|               | <b>1DX6</b> | <b>6EQM</b>   |
| 1             | 0.49        | 0.75          |
| 2             | 0.50        | 0.80          |
| 3             | 0.89        | 0.92          |

- *Ligand 1: separated from the complex (native form, not prepared).*
- *Ligand 2: separated from the complex and re-prepared using appropriate procedure indicated in the section of Materials and Methods*
- *Ligand 3: built and prepared from the beginning.*

**Table S5:** Docking results and ligand interaction (Co-crystallized 1DX6)

| Compound       | Observed pIC50 | Docking score (kJ.mol <sup>-1</sup> ) | Interactions                                                                                                                                                                                                                                                                                                                                                                                                                                                                                                                                                                                                                                                                                                                                                                                                                                                                                                     |
|----------------|----------------|---------------------------------------|------------------------------------------------------------------------------------------------------------------------------------------------------------------------------------------------------------------------------------------------------------------------------------------------------------------------------------------------------------------------------------------------------------------------------------------------------------------------------------------------------------------------------------------------------------------------------------------------------------------------------------------------------------------------------------------------------------------------------------------------------------------------------------------------------------------------------------------------------------------------------------------------------------------|
| B1 (Baicalein) | 4.43           | -27.06                                | <p>The diagram illustrates the docking of Baicalein (B1) into the binding pocket of protein 1DX6. The ligand is shown in a stick representation with blue highlights on its aromatic rings. It is surrounded by several amino acid residues, each enclosed in a colored circle: Glu 199 (red), Tyr 130 (purple), Gly 118 (light blue), Gly 123 (light purple), Gly 117 (light purple), Ser 122 (light purple), Trp 84 (blue), Phe 331 (light green), Phe 330 (light green), and Tyr 334 (light purple). Two specific hydrogen bonds are highlighted with green dotted lines and labeled: one between the hydroxyl group of Tyr 130 and the ether oxygen of Baicalein (distance 2.61 Å, 68% probability), and another between the hydroxyl group of Gly 117 and the ether oxygen (distance 1.82 Å, 20% probability). Other residues are shown in proximity to the ligand, suggesting additional interactions.</p> |

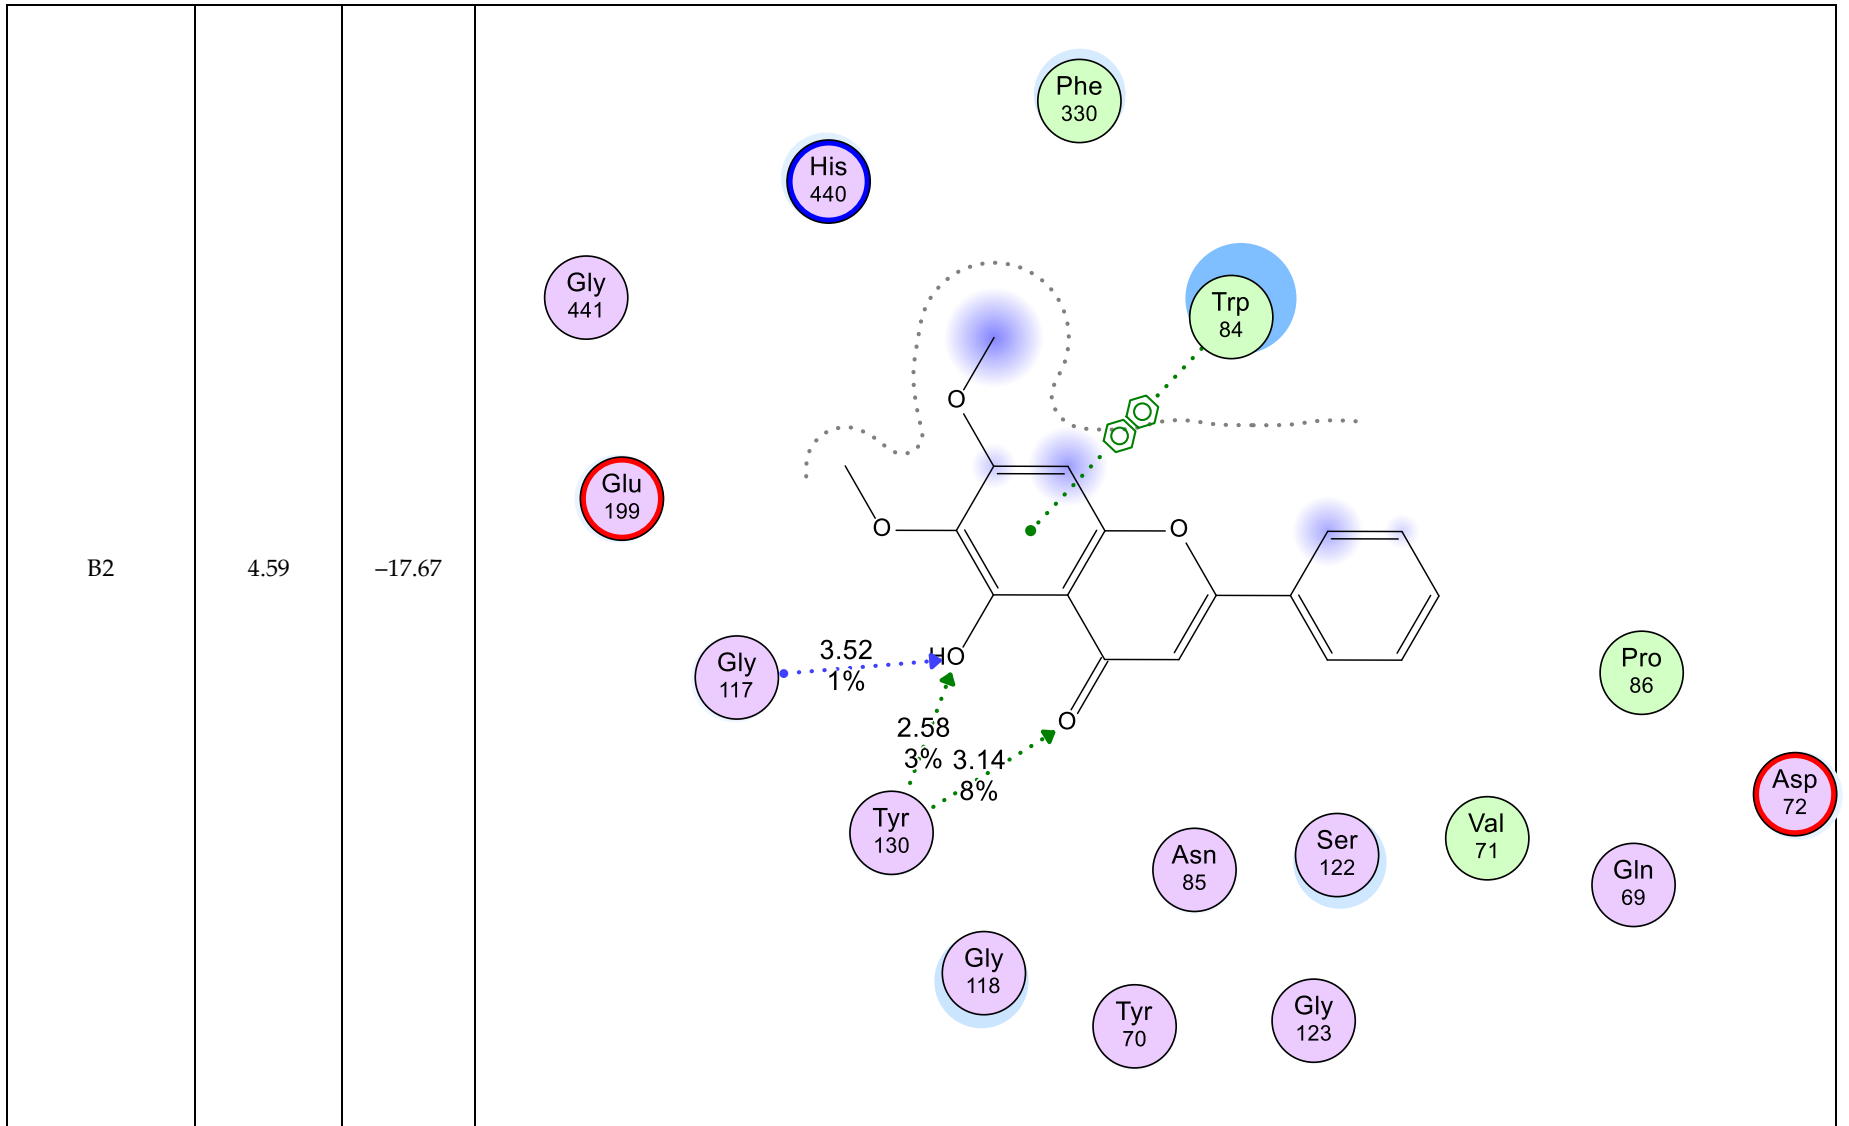

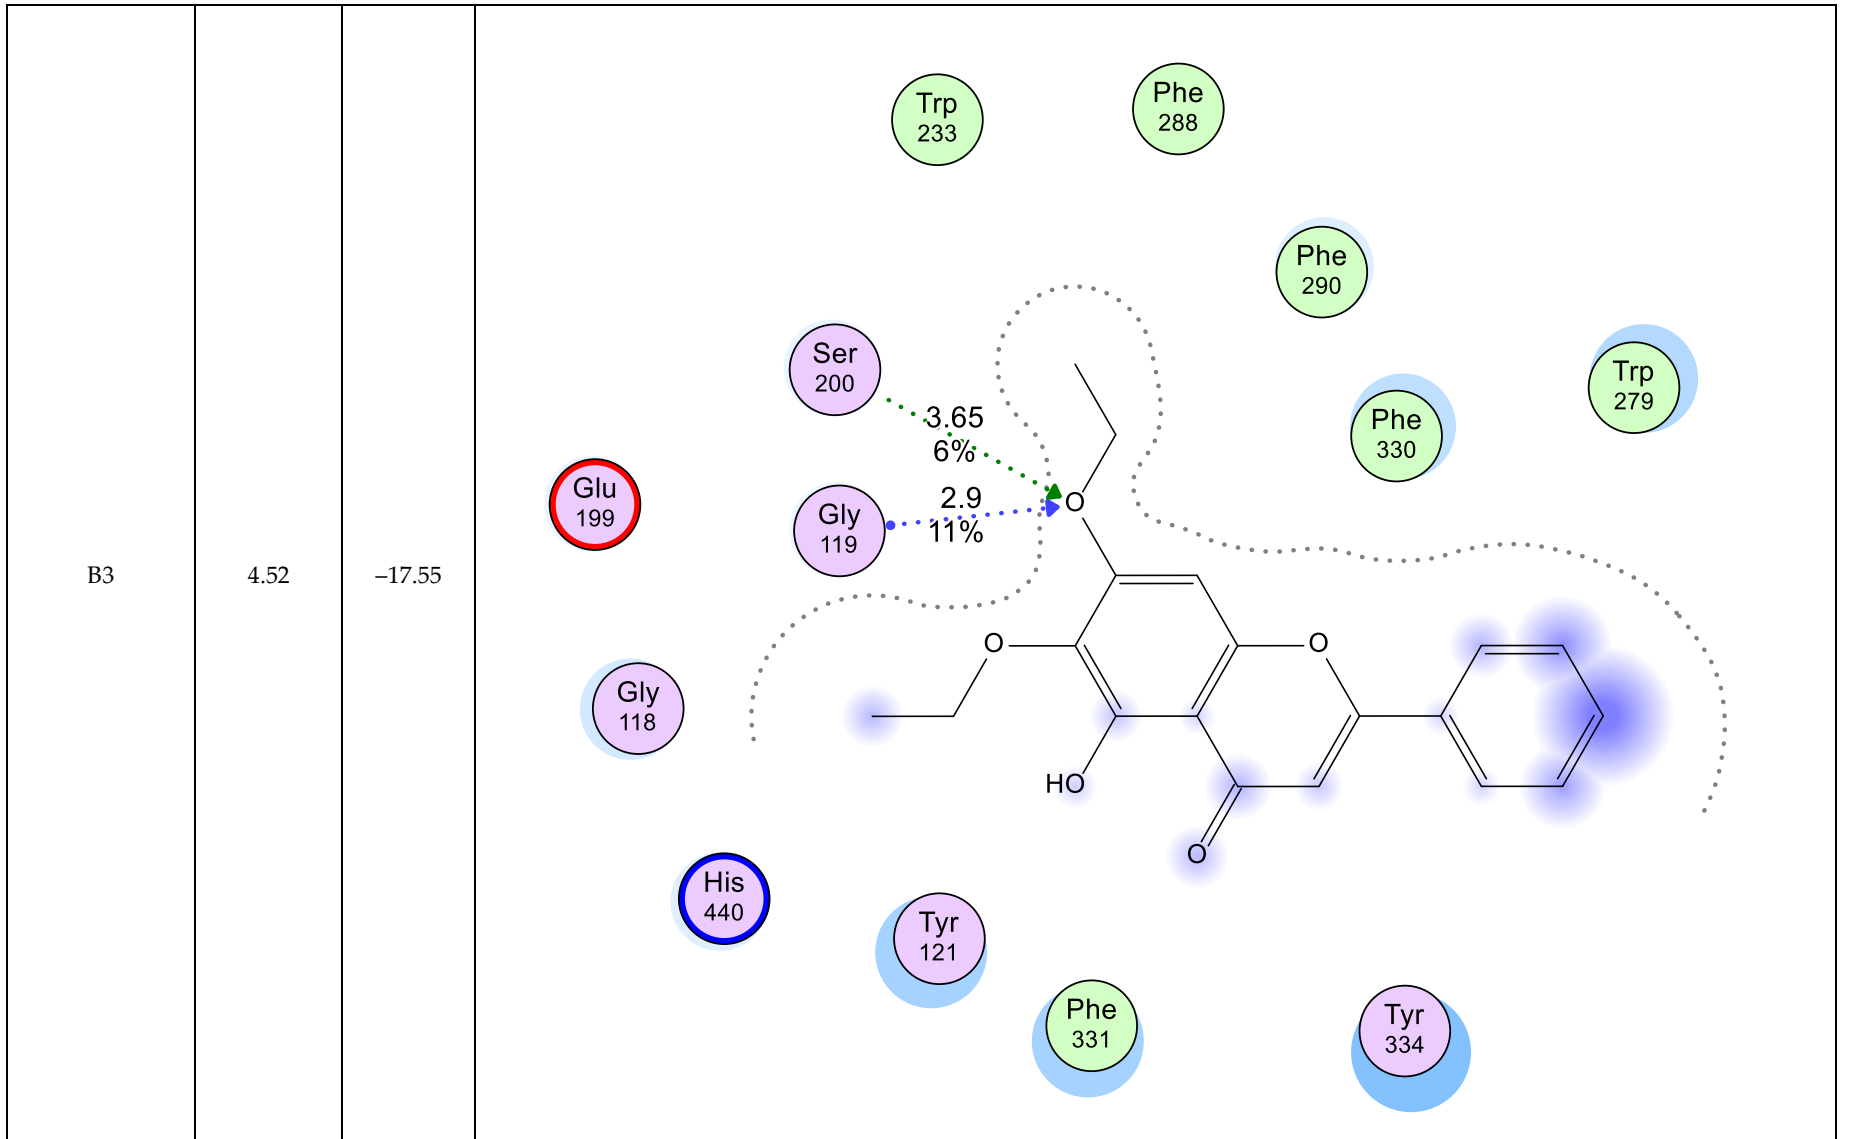



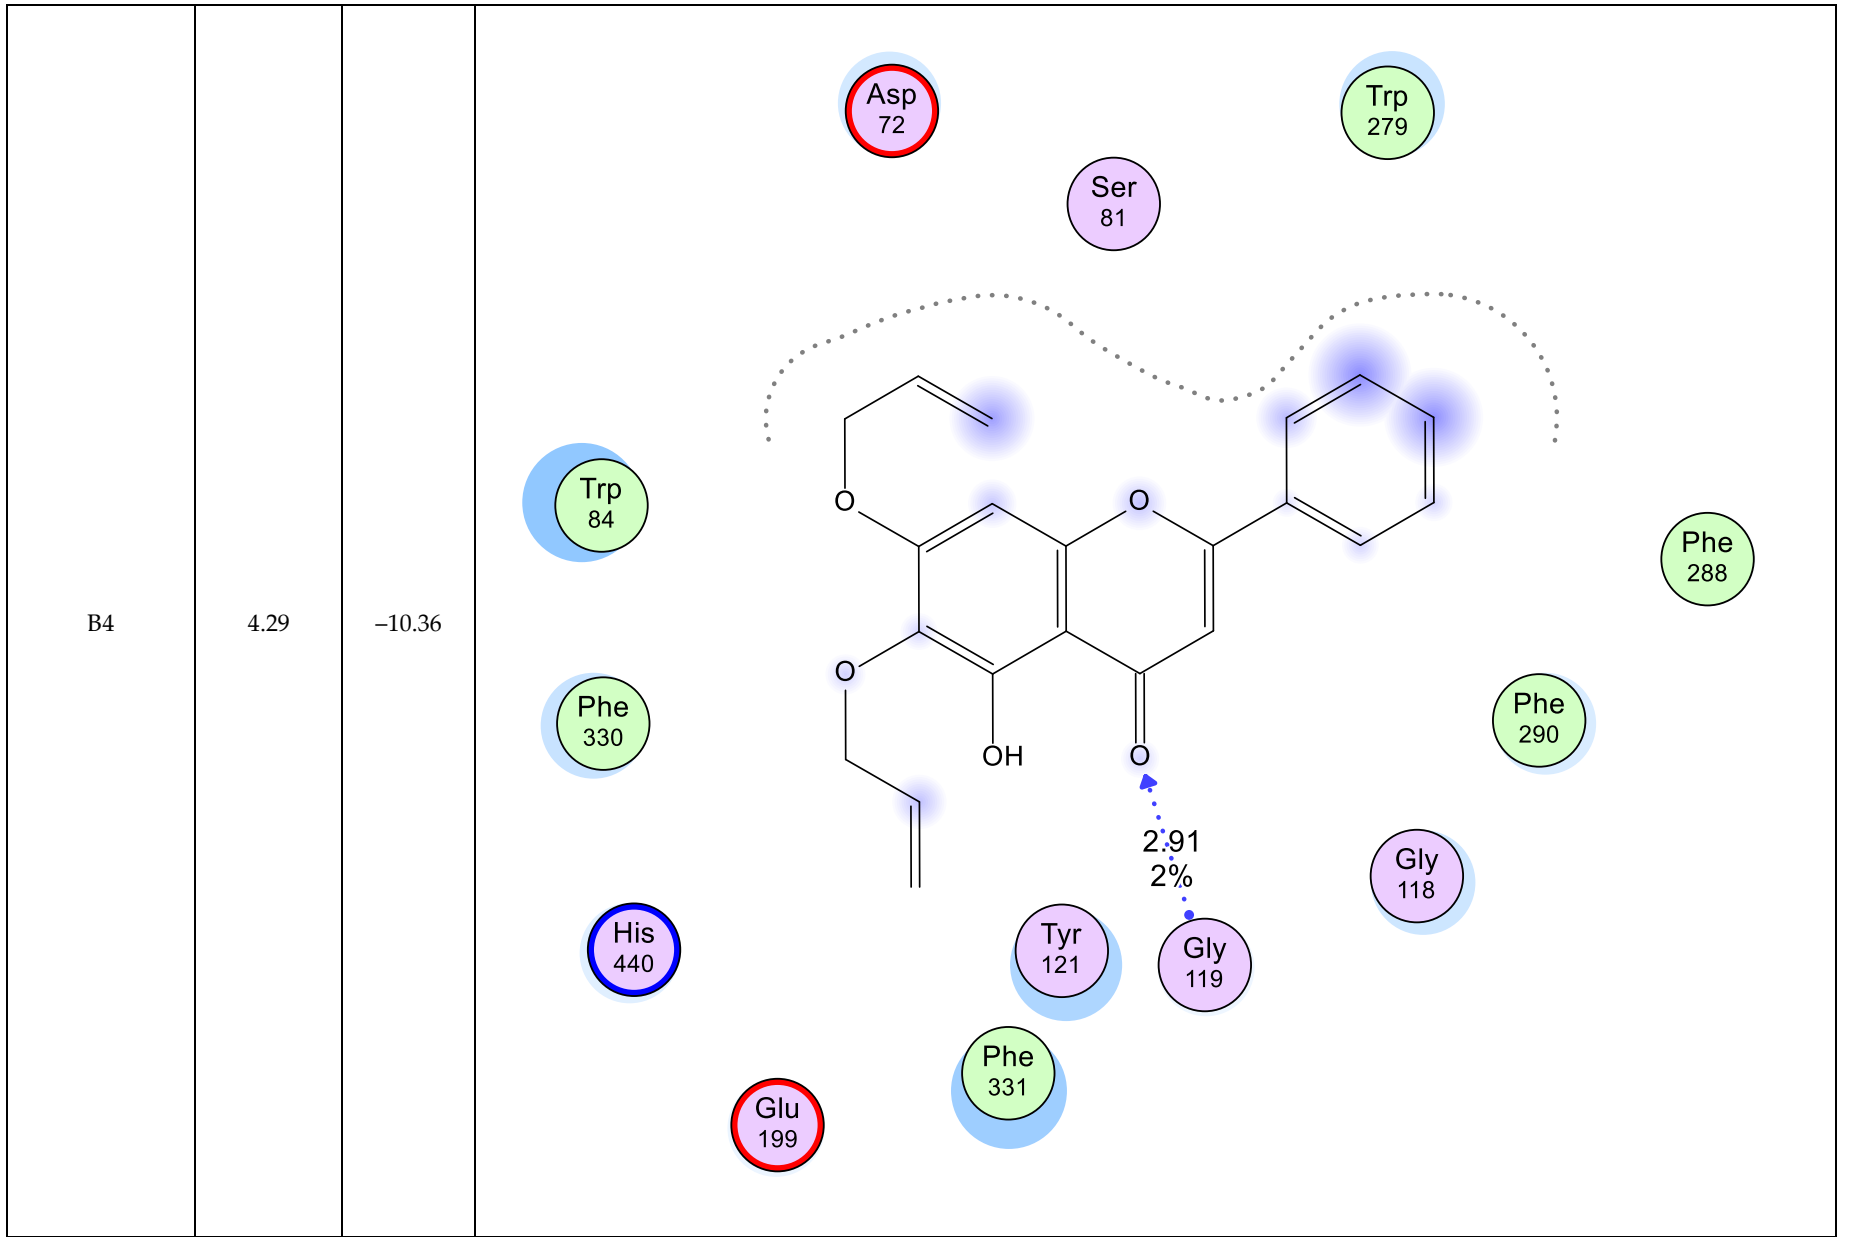

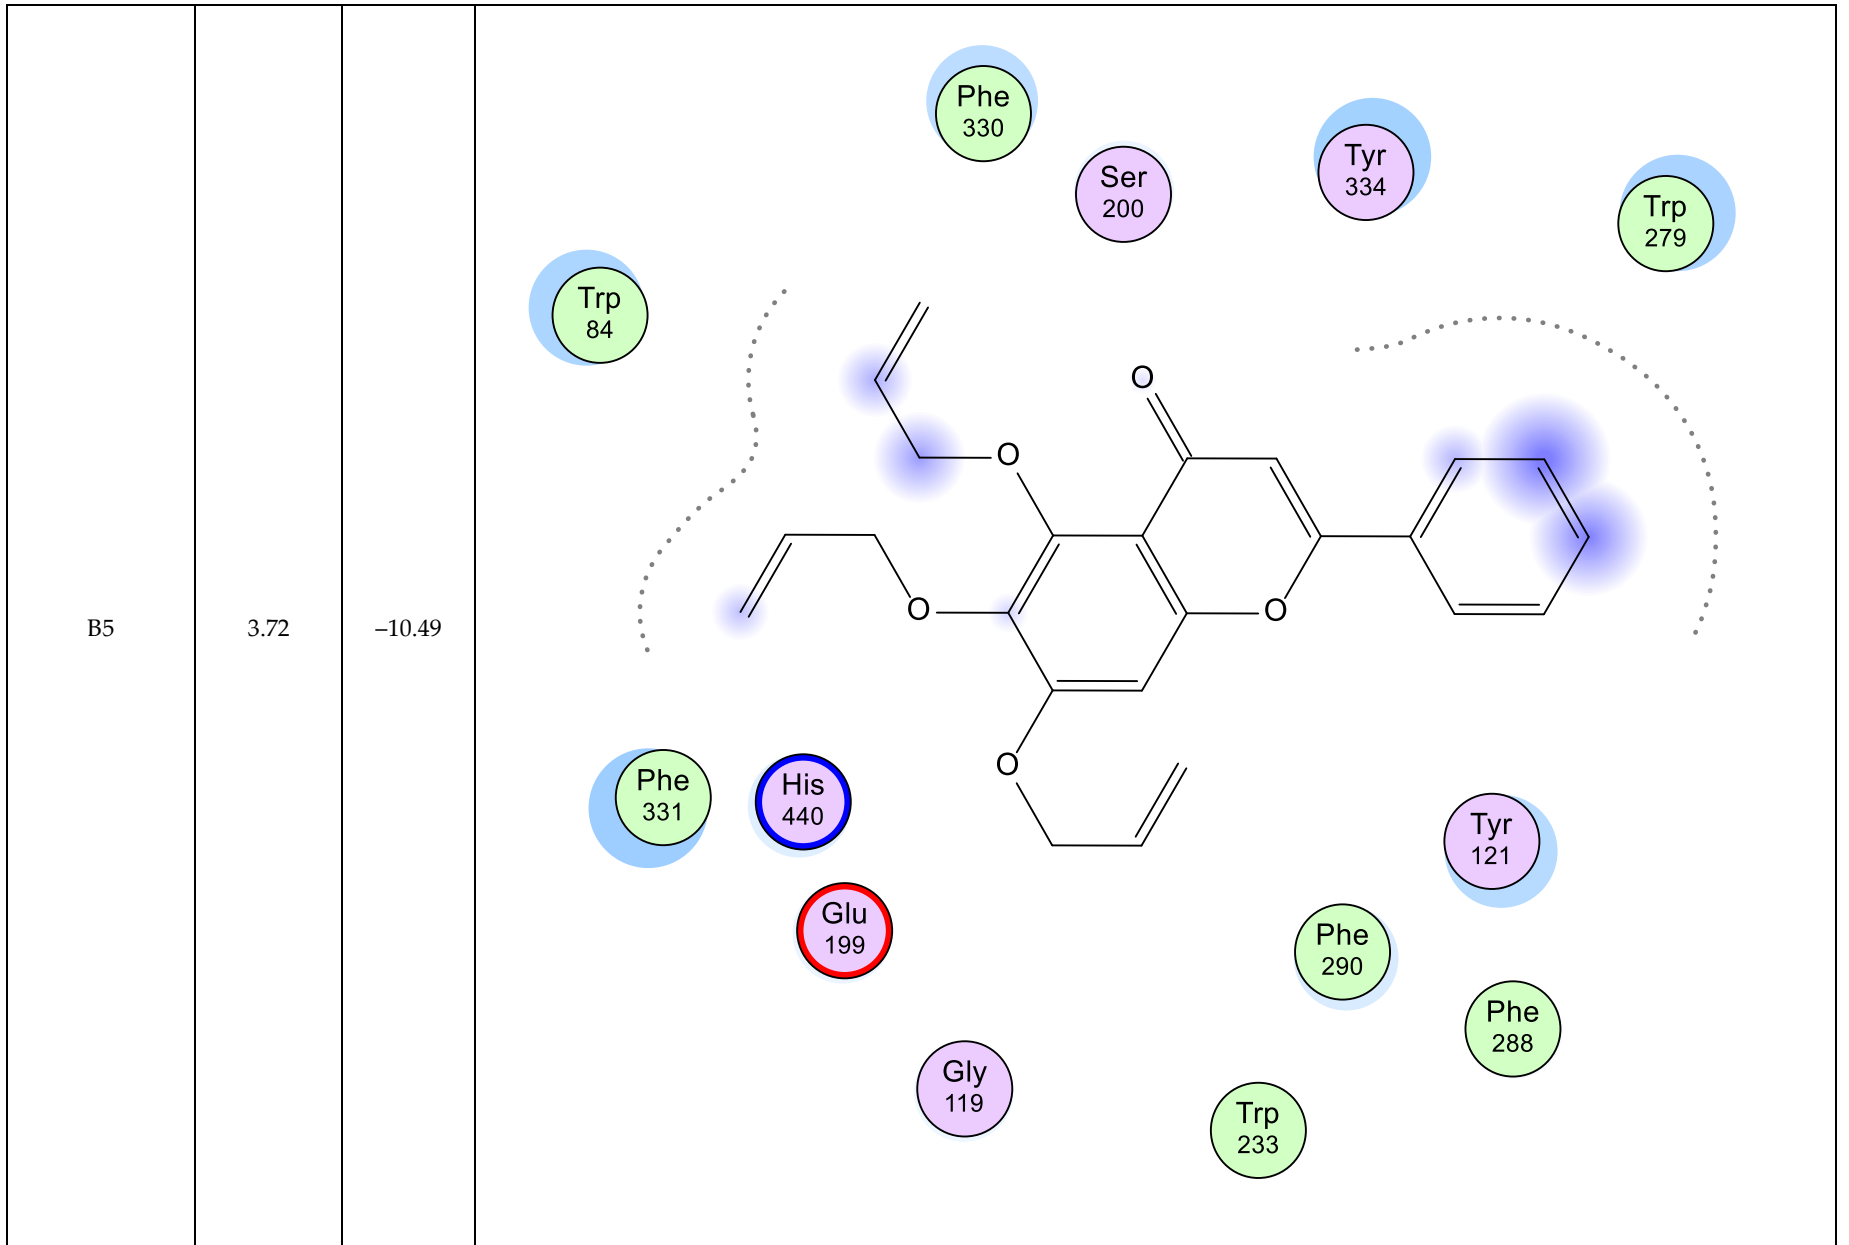

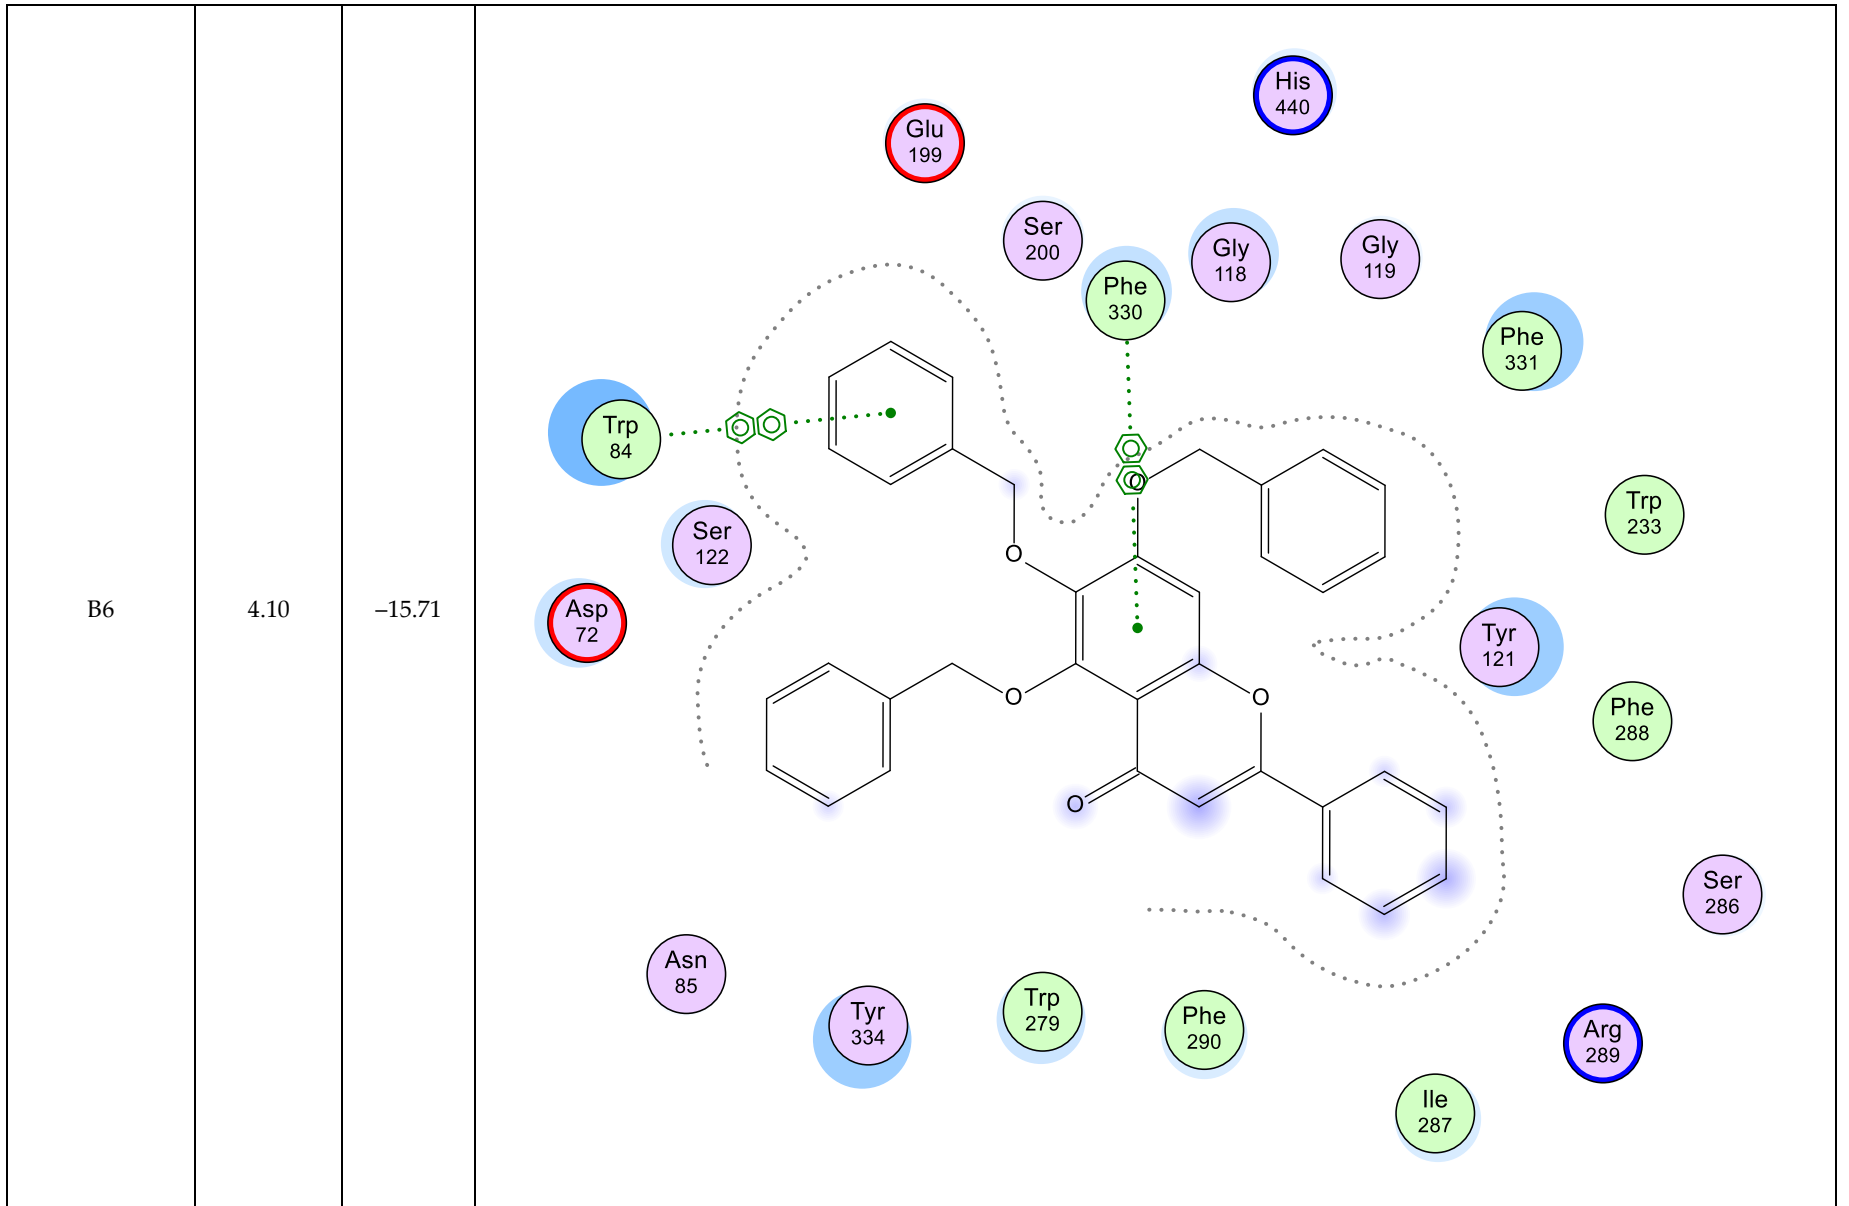

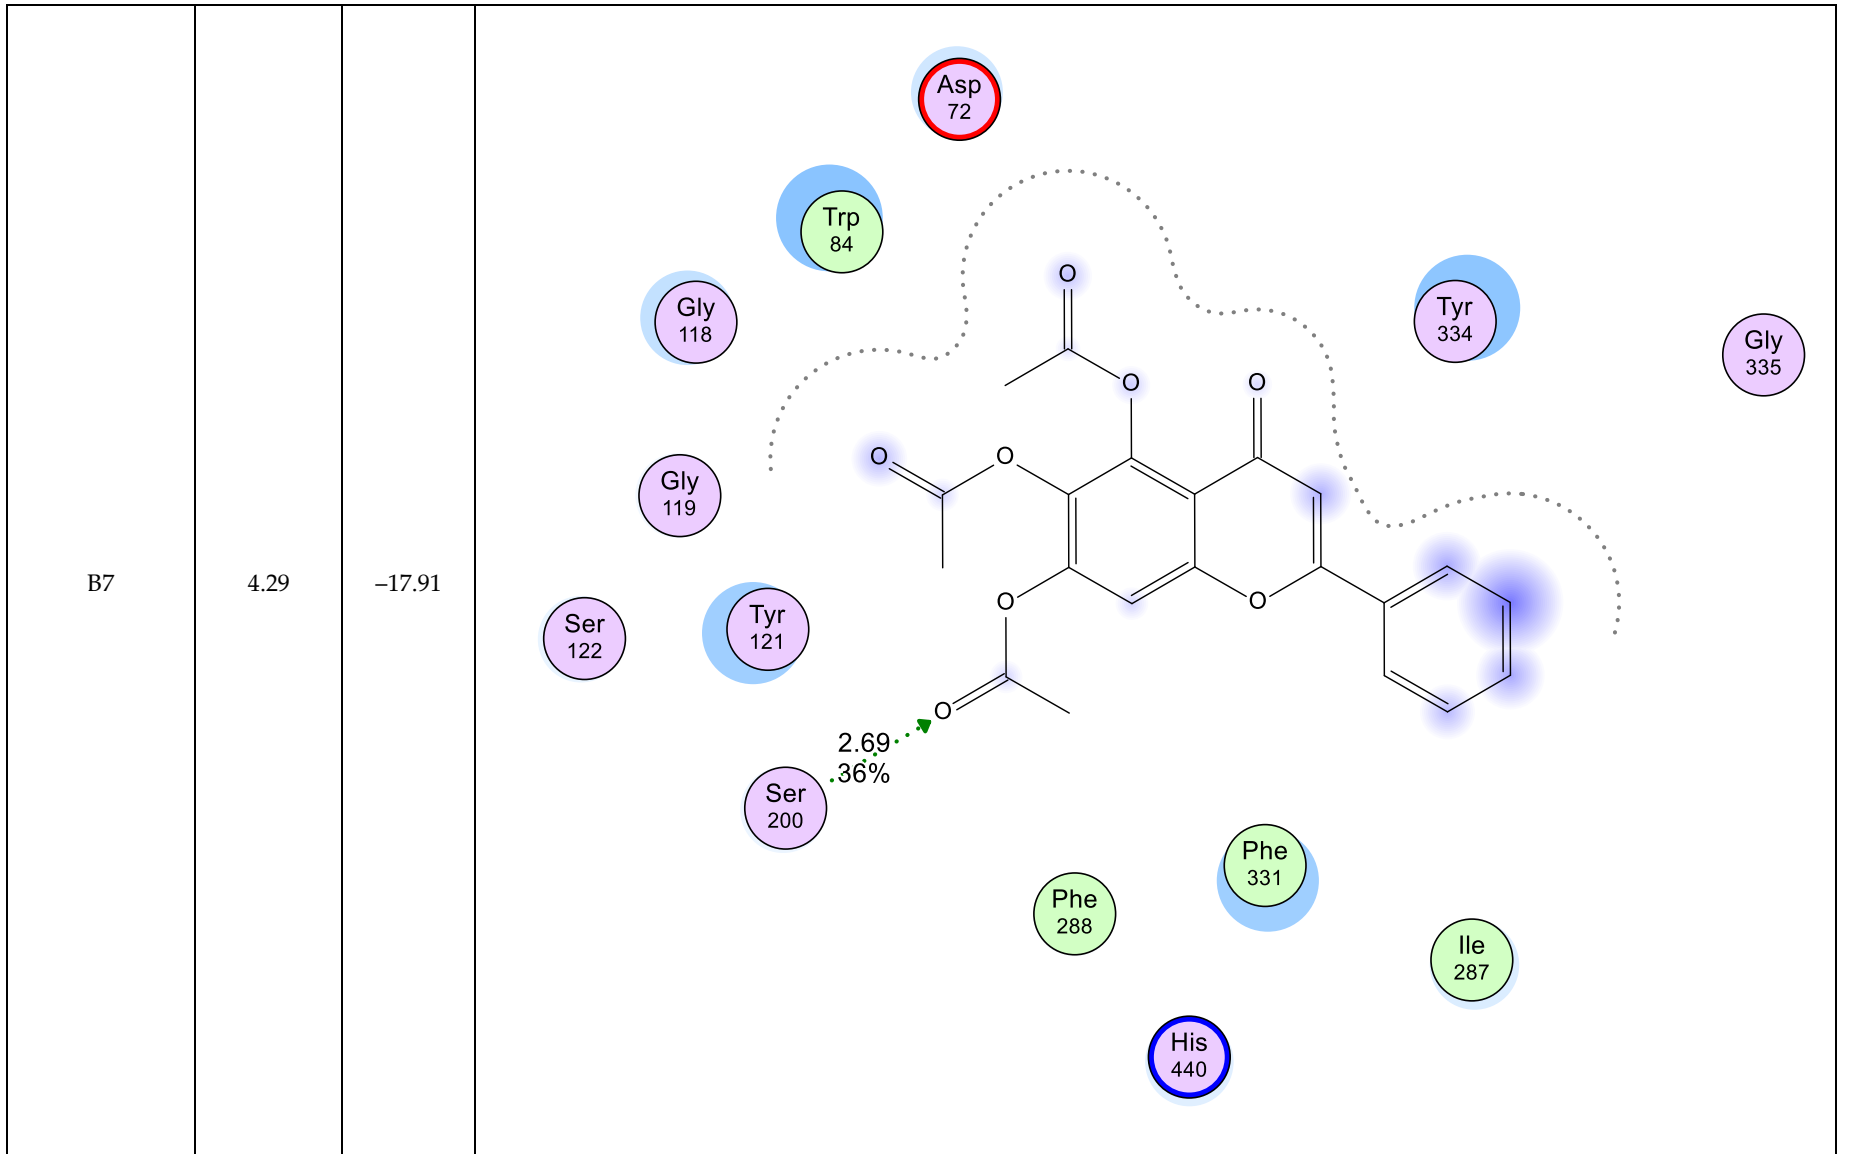

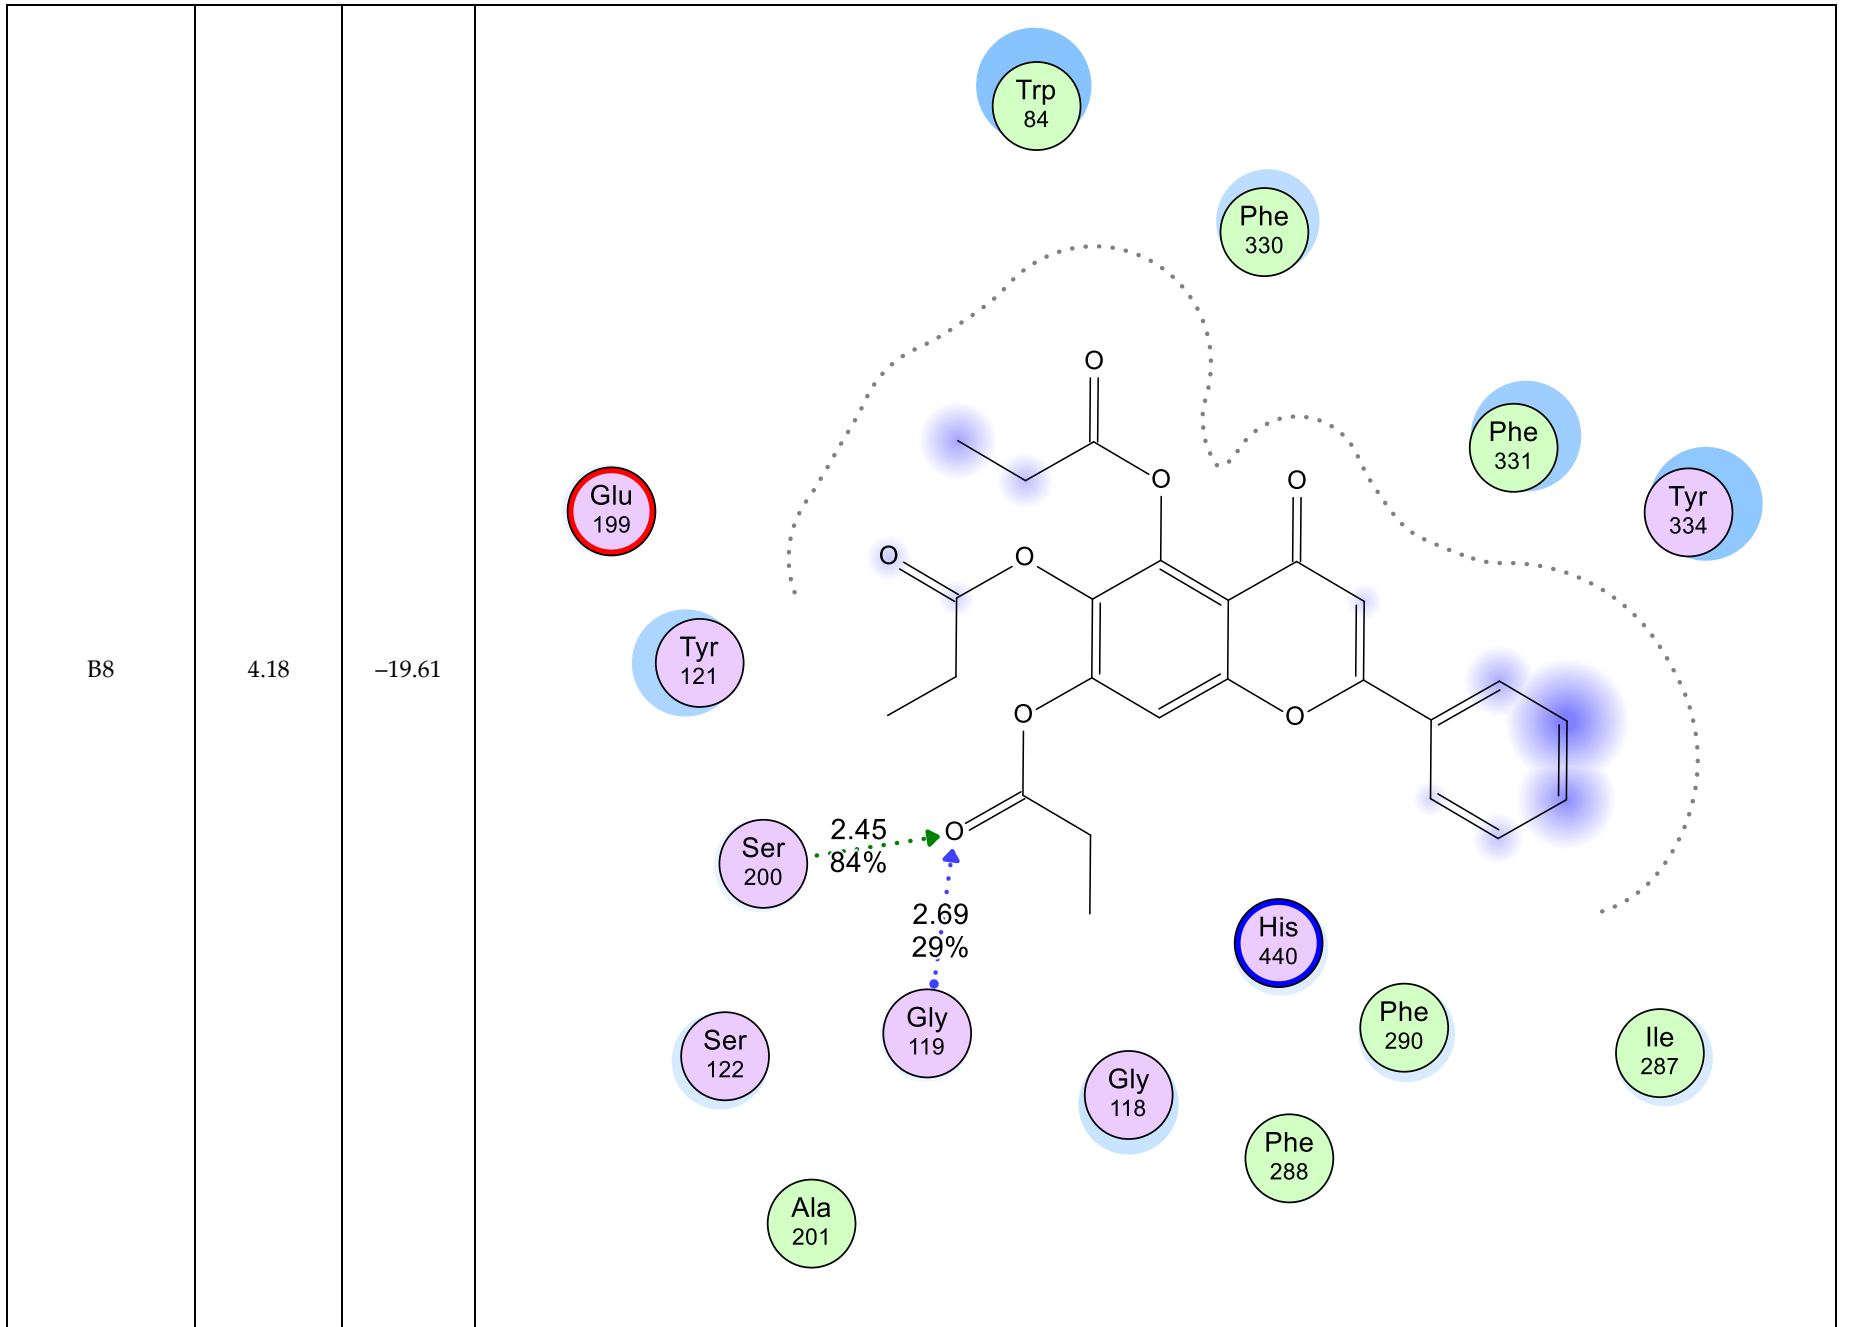

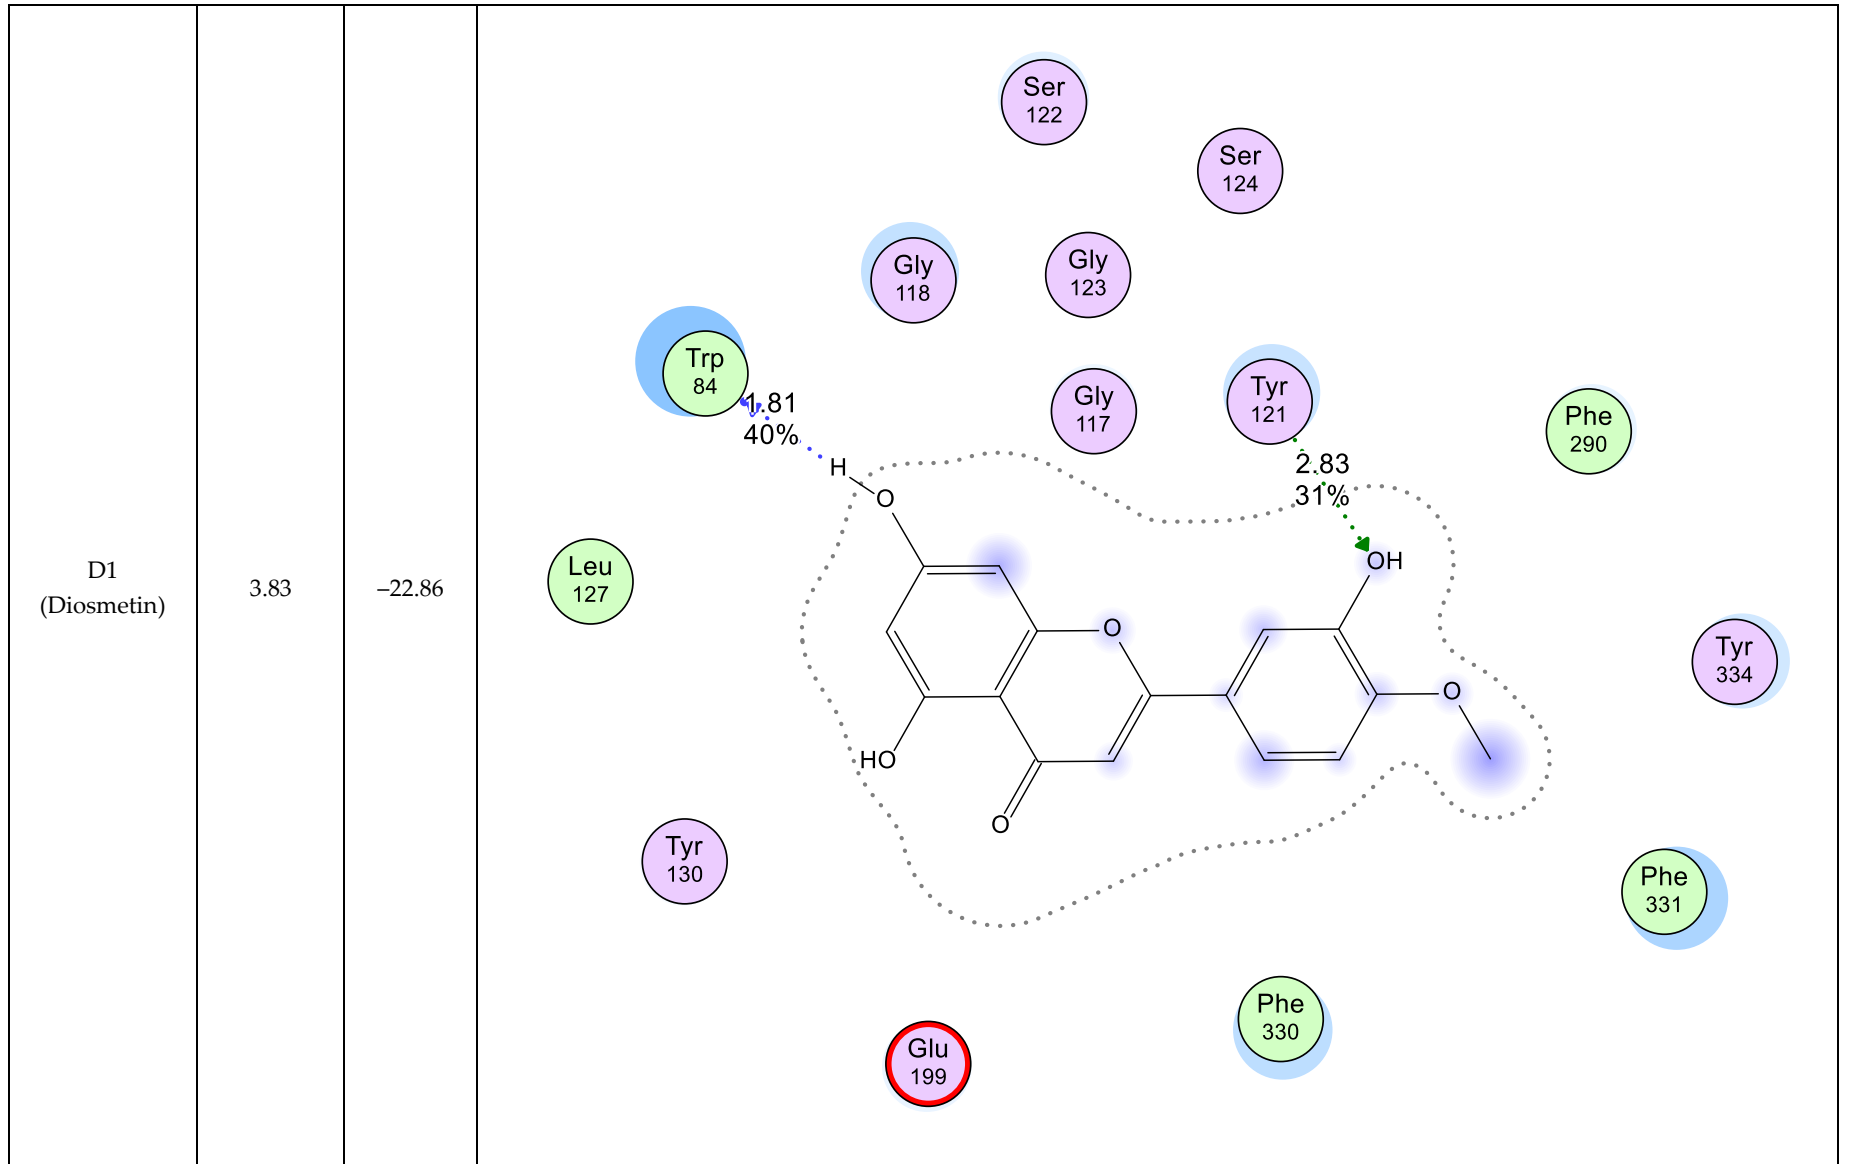

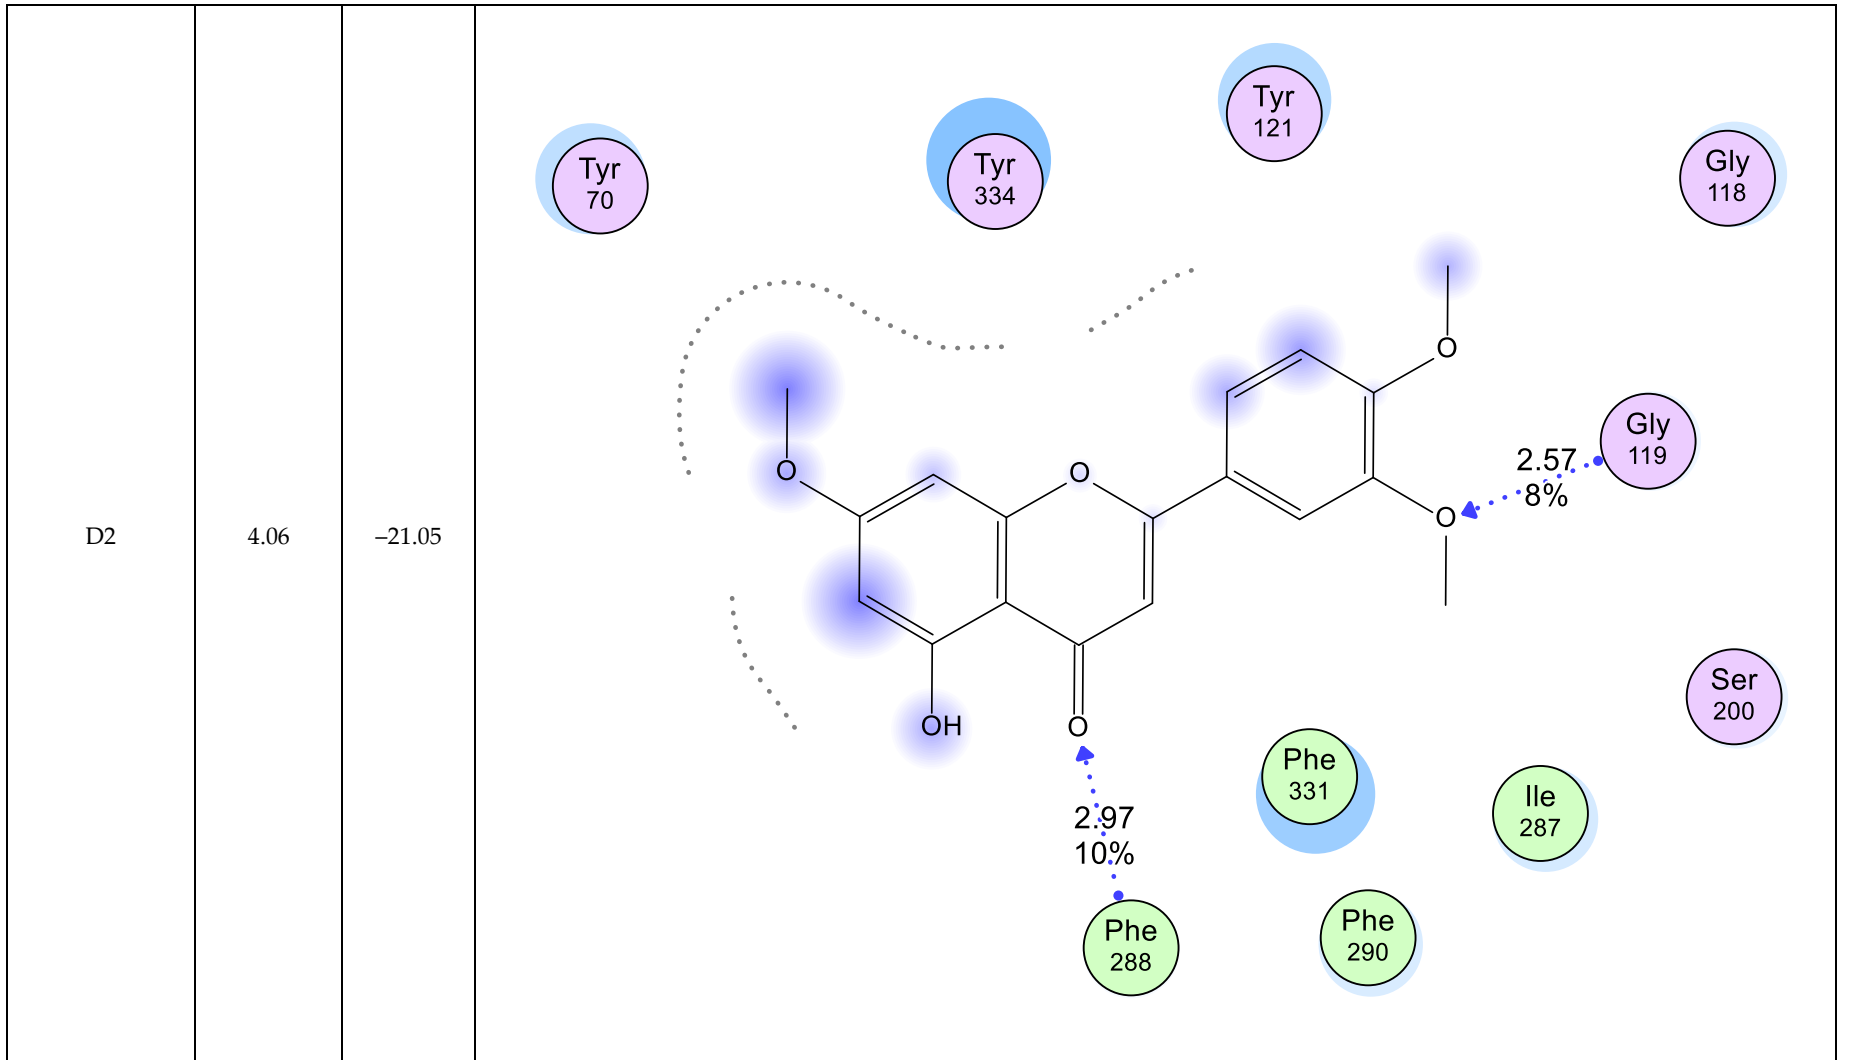

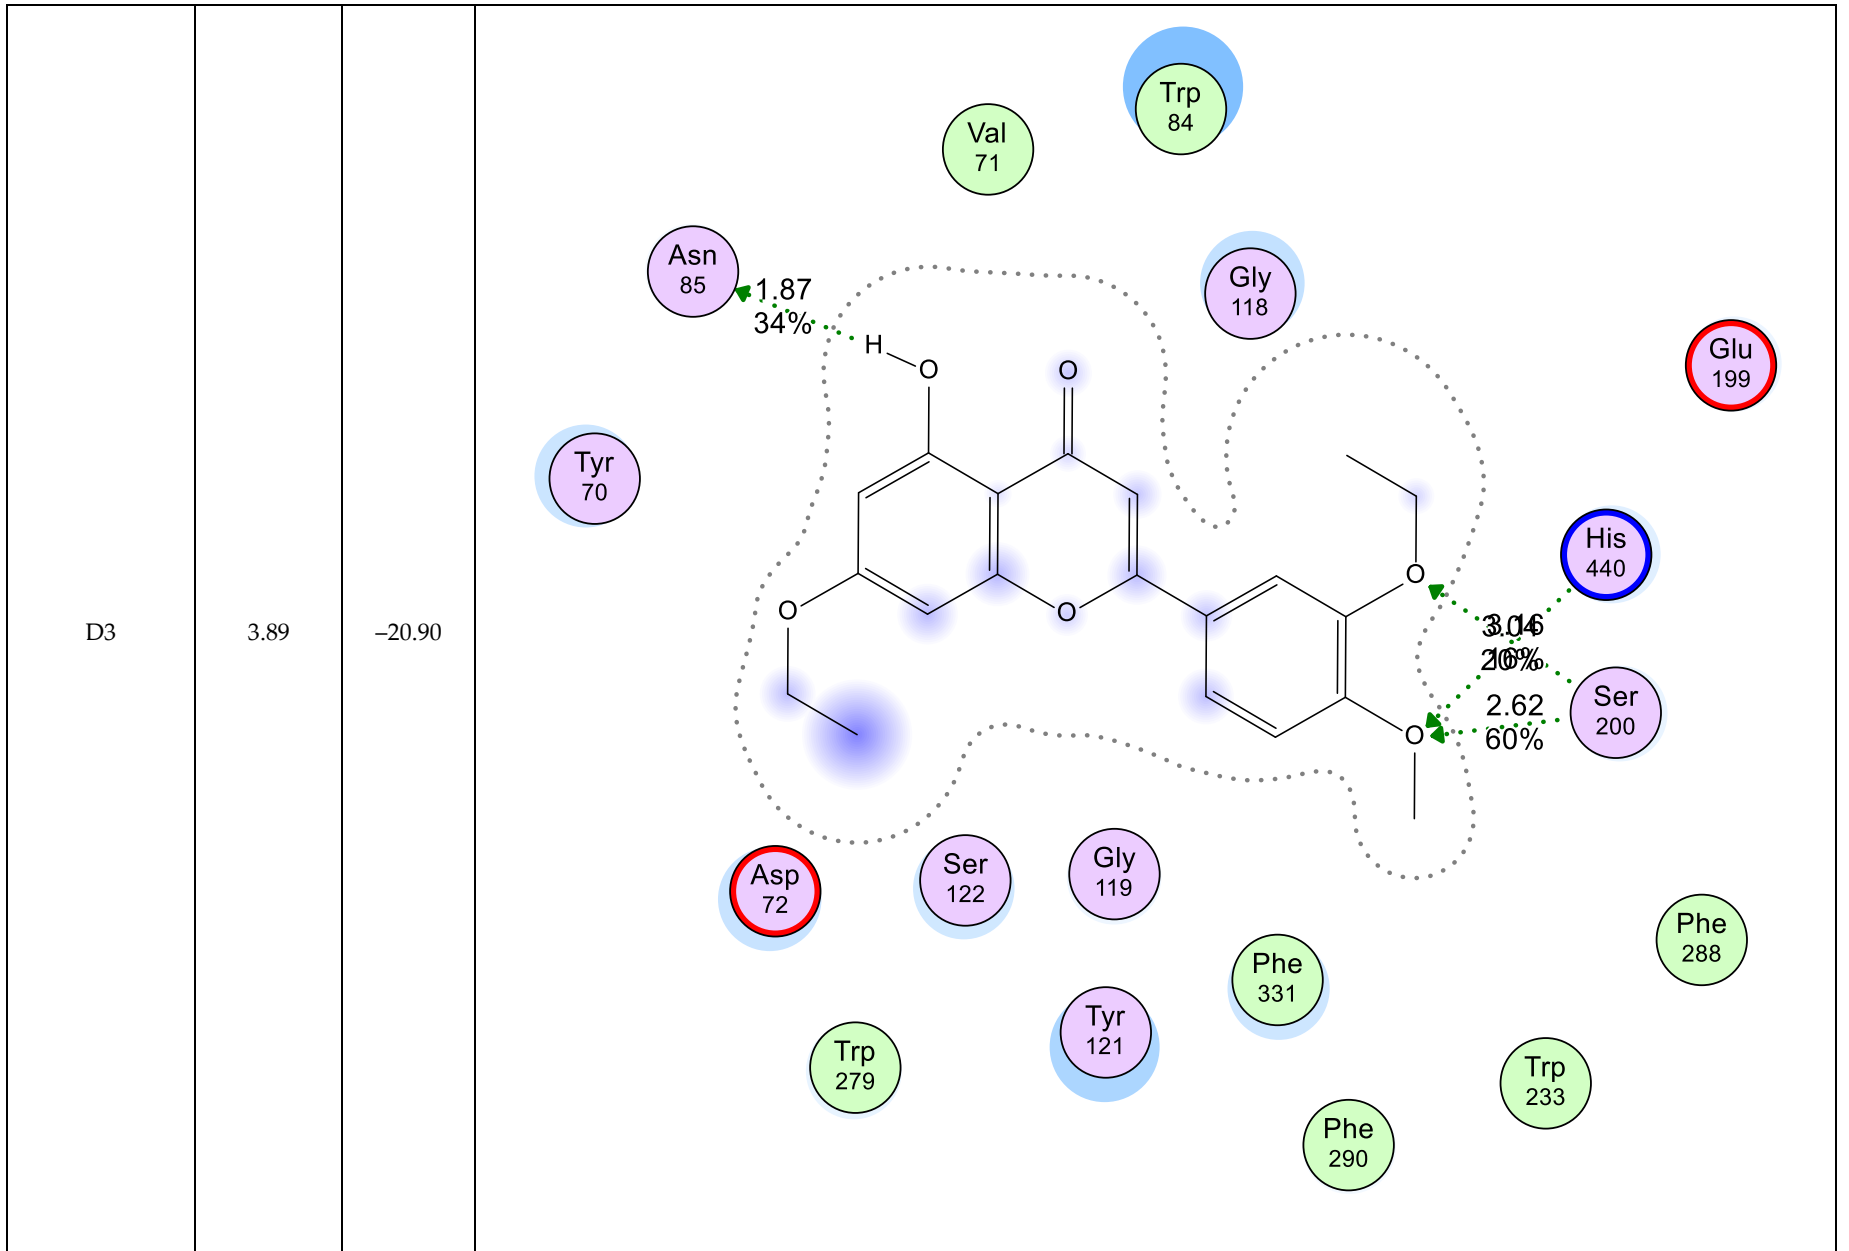



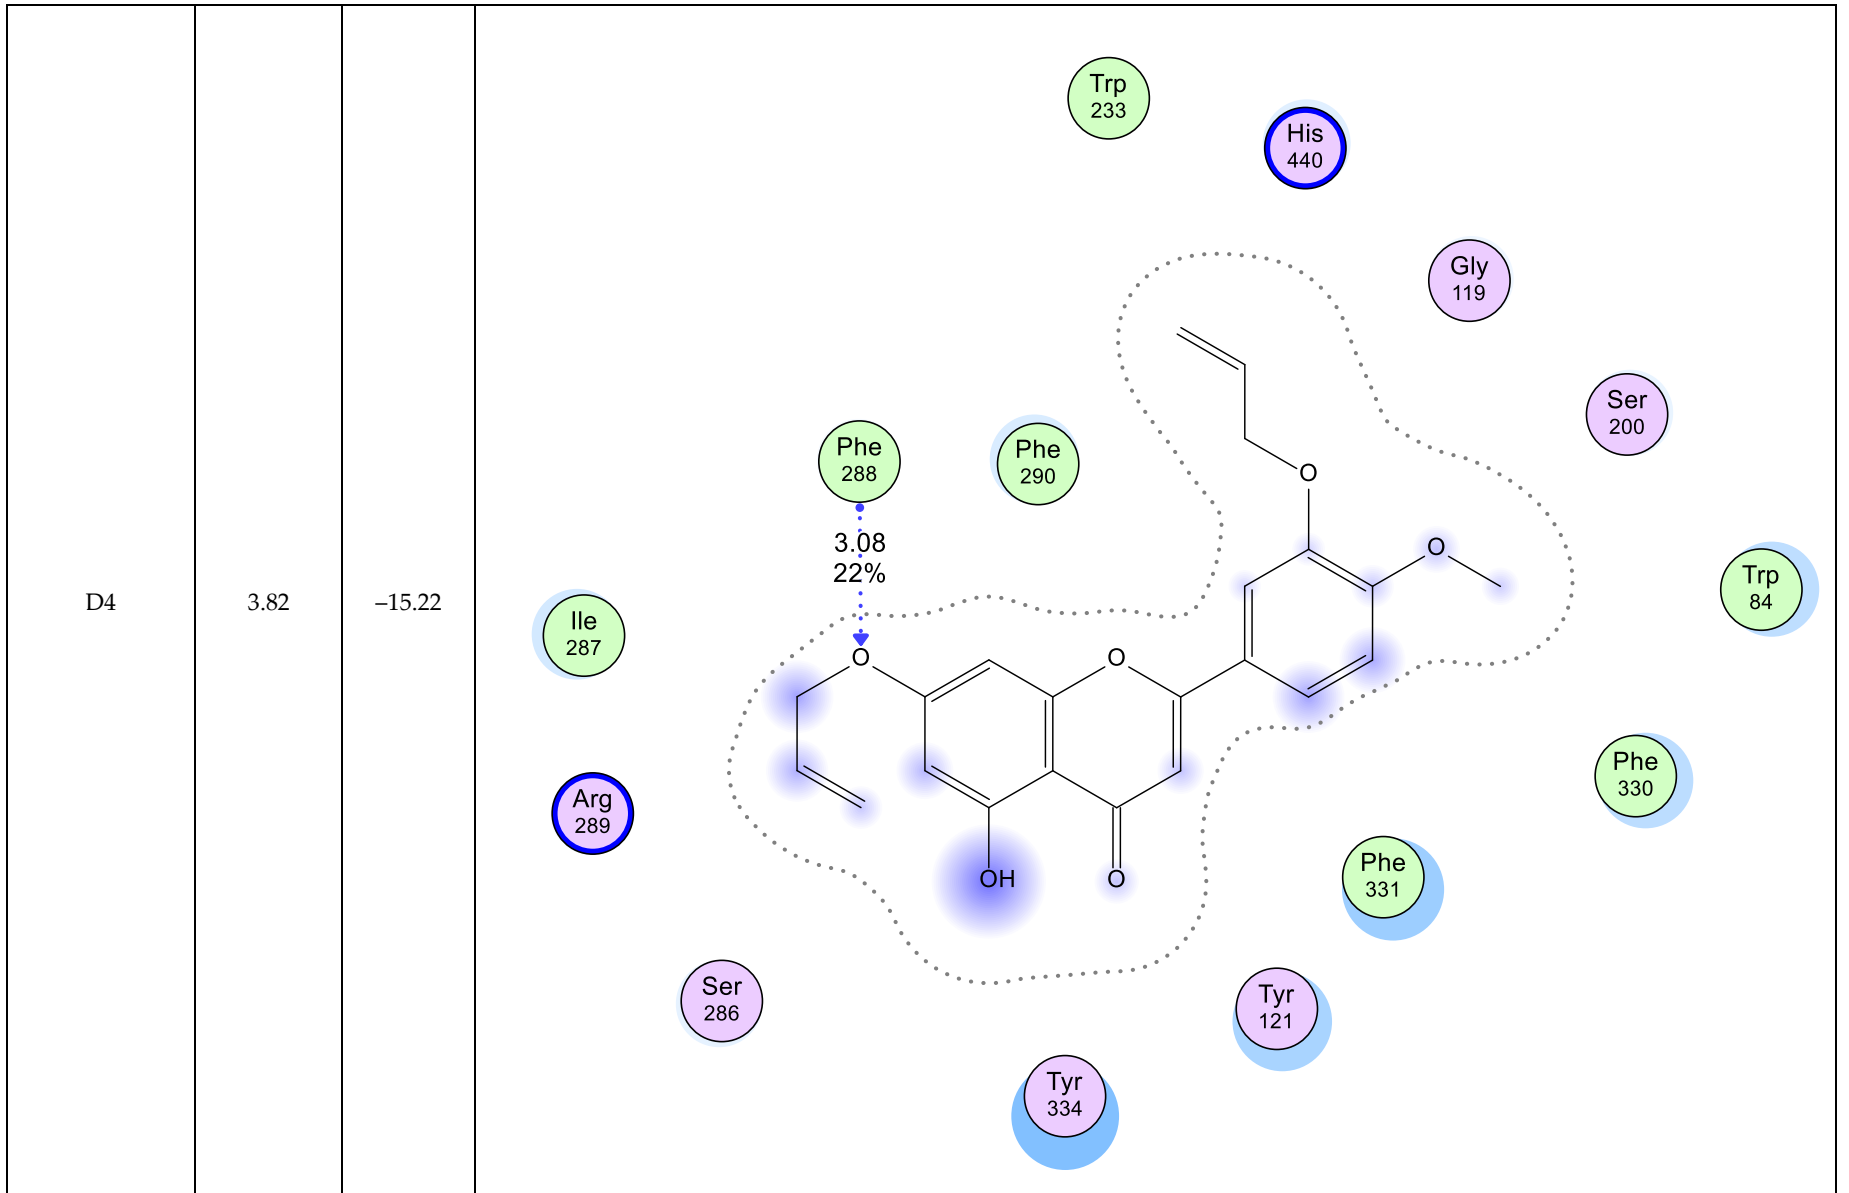

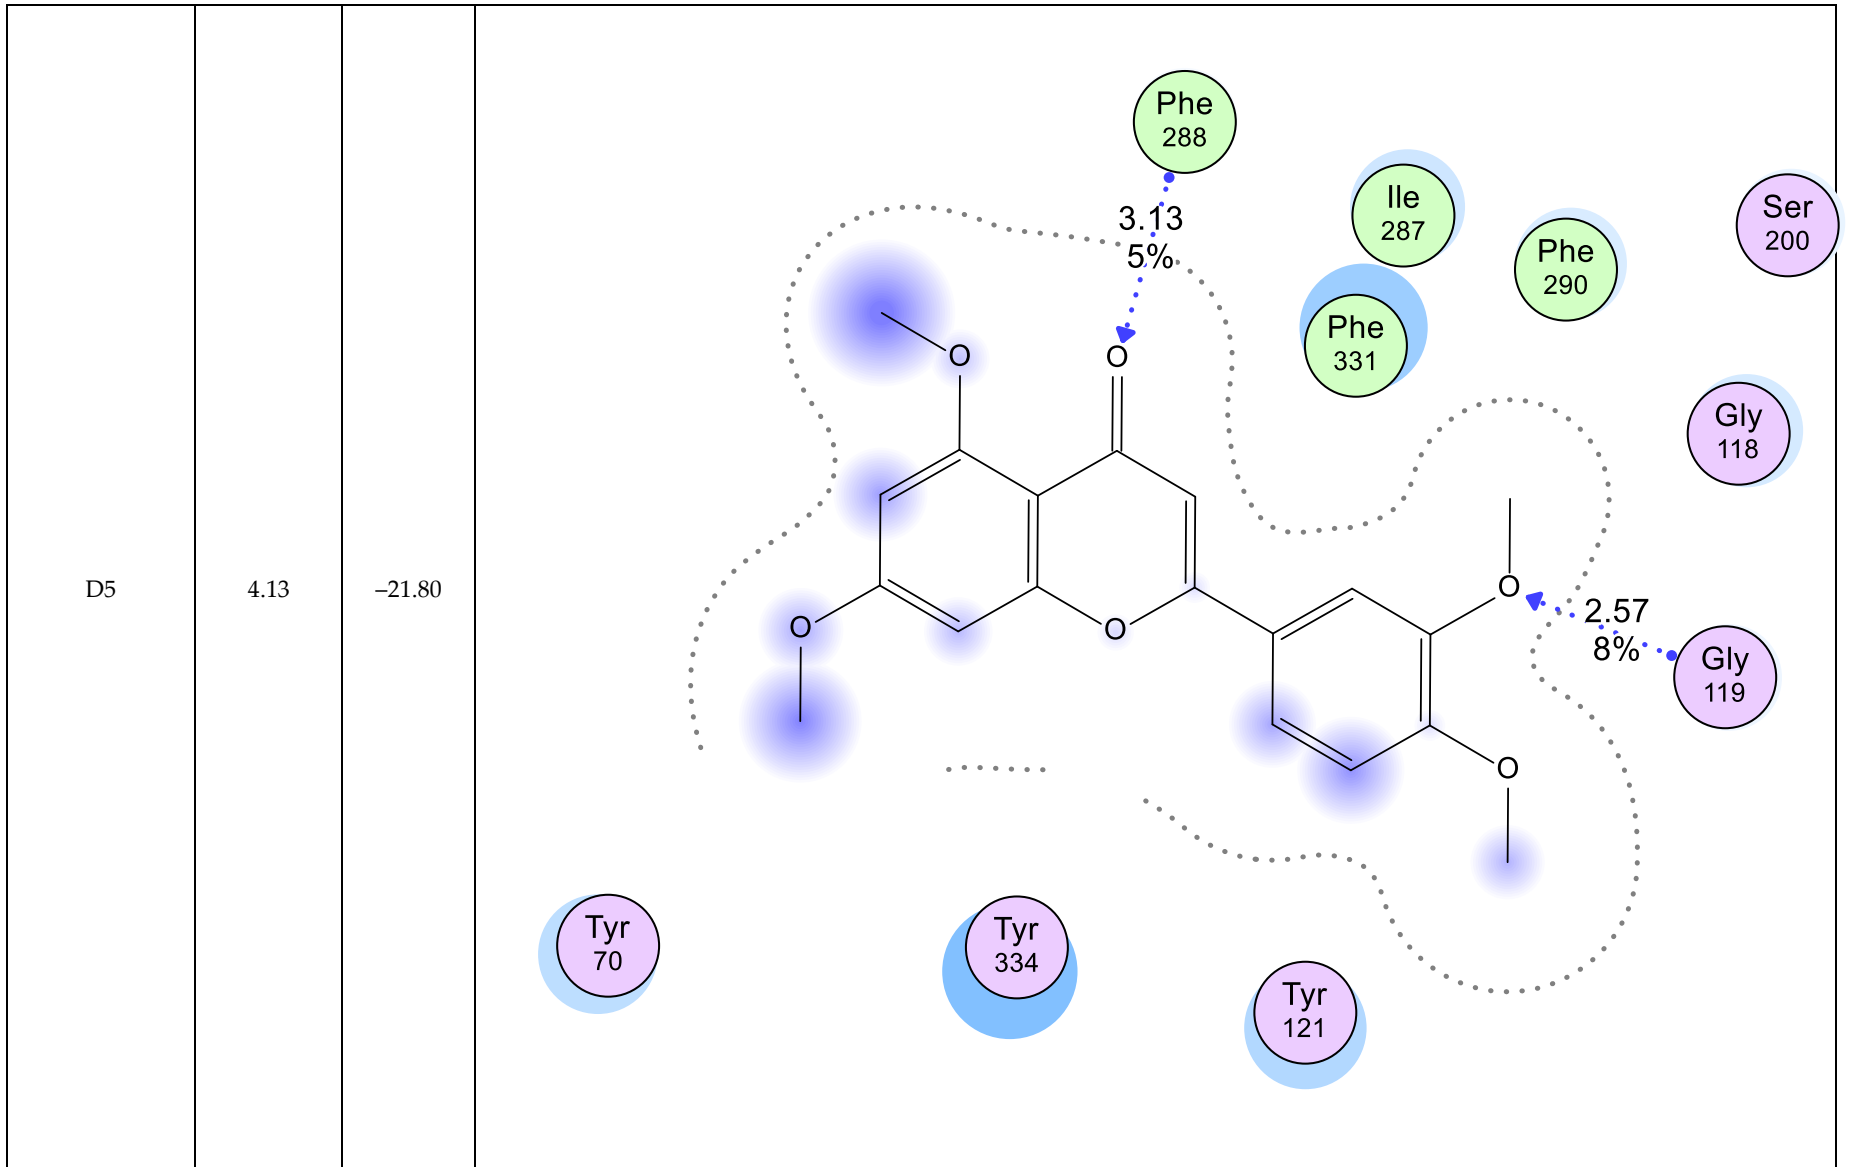

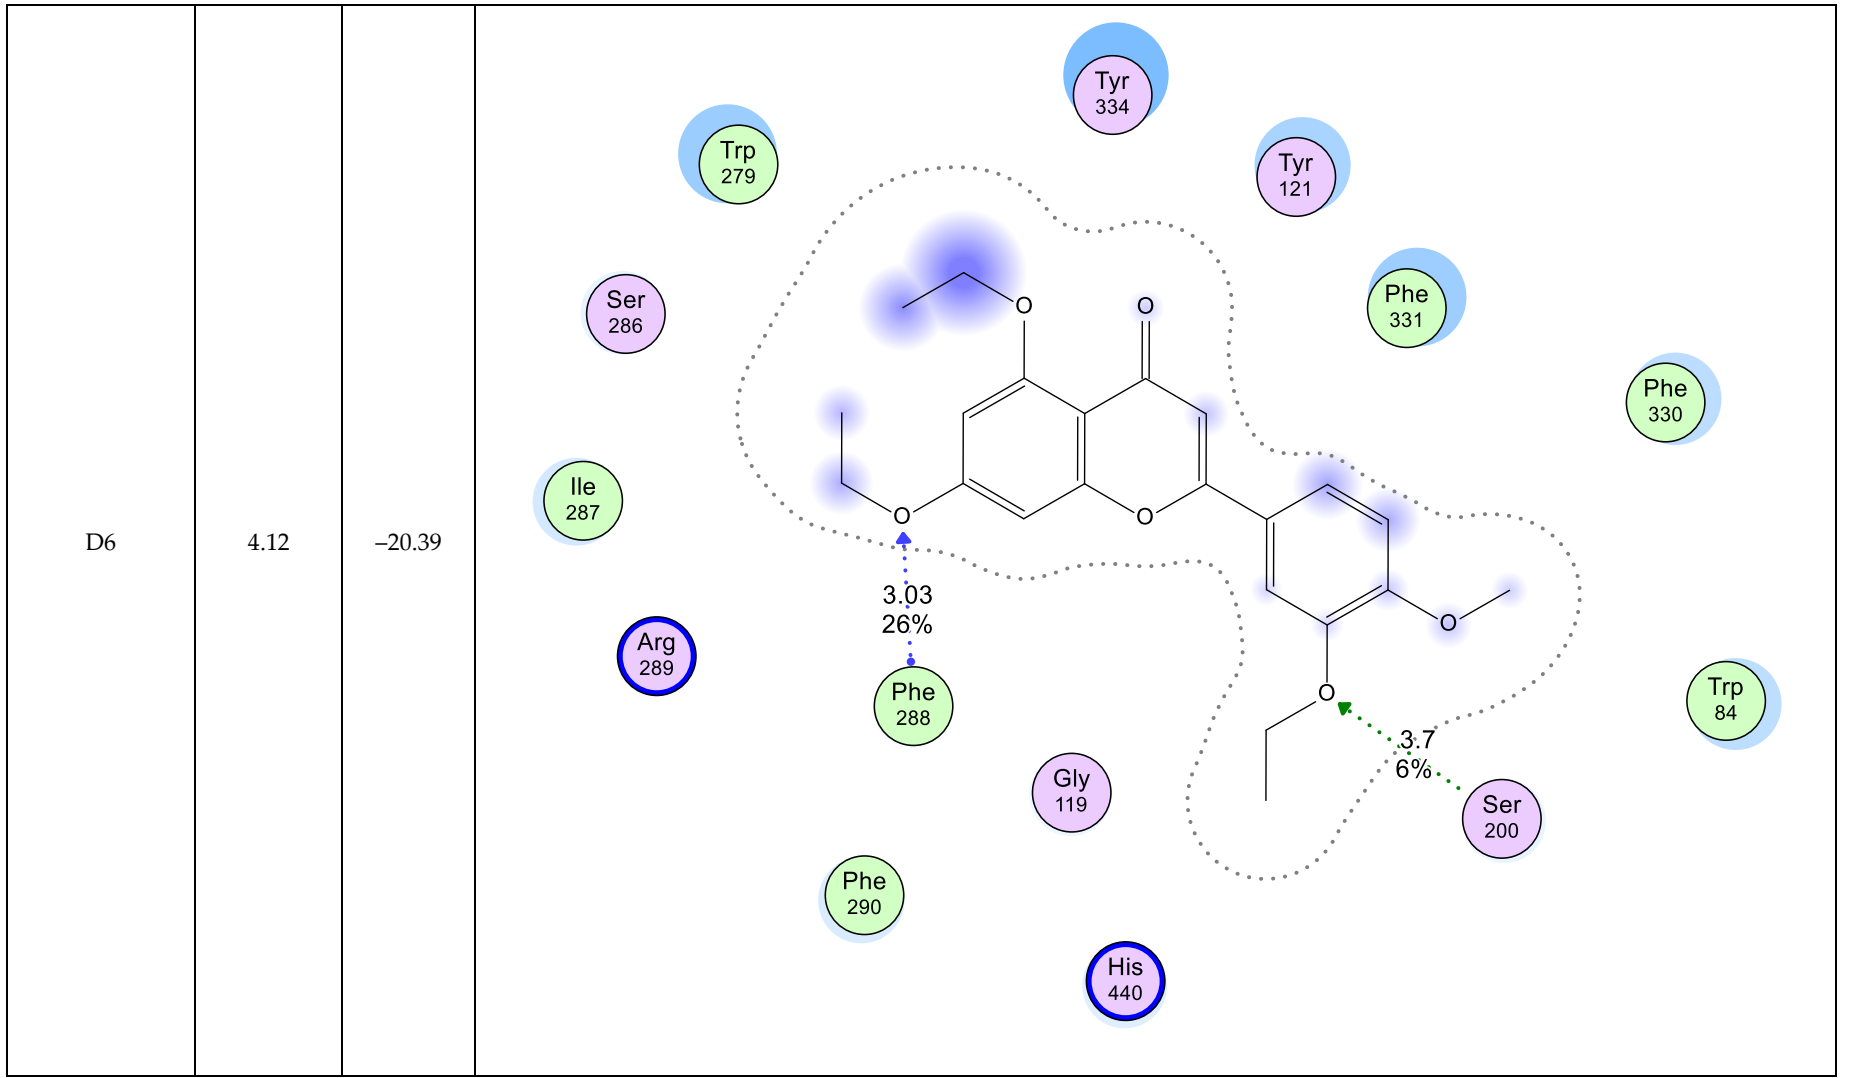

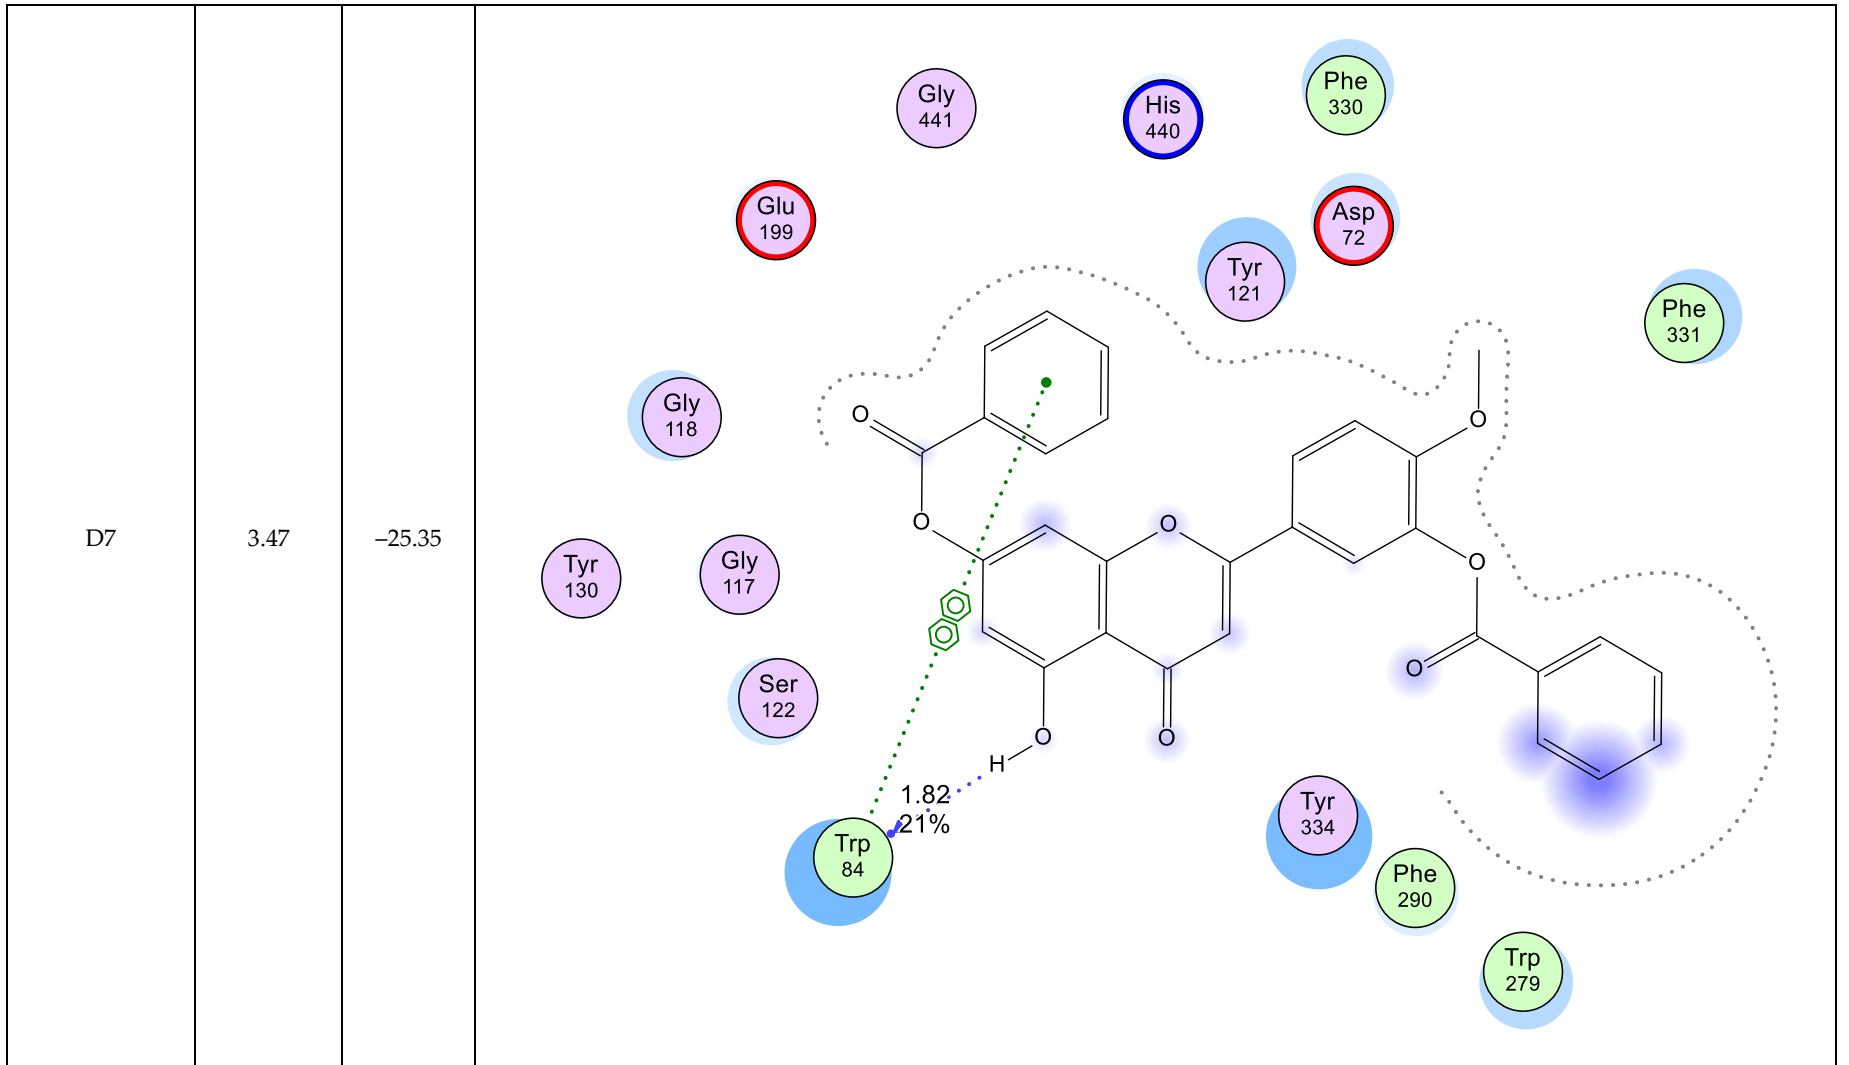

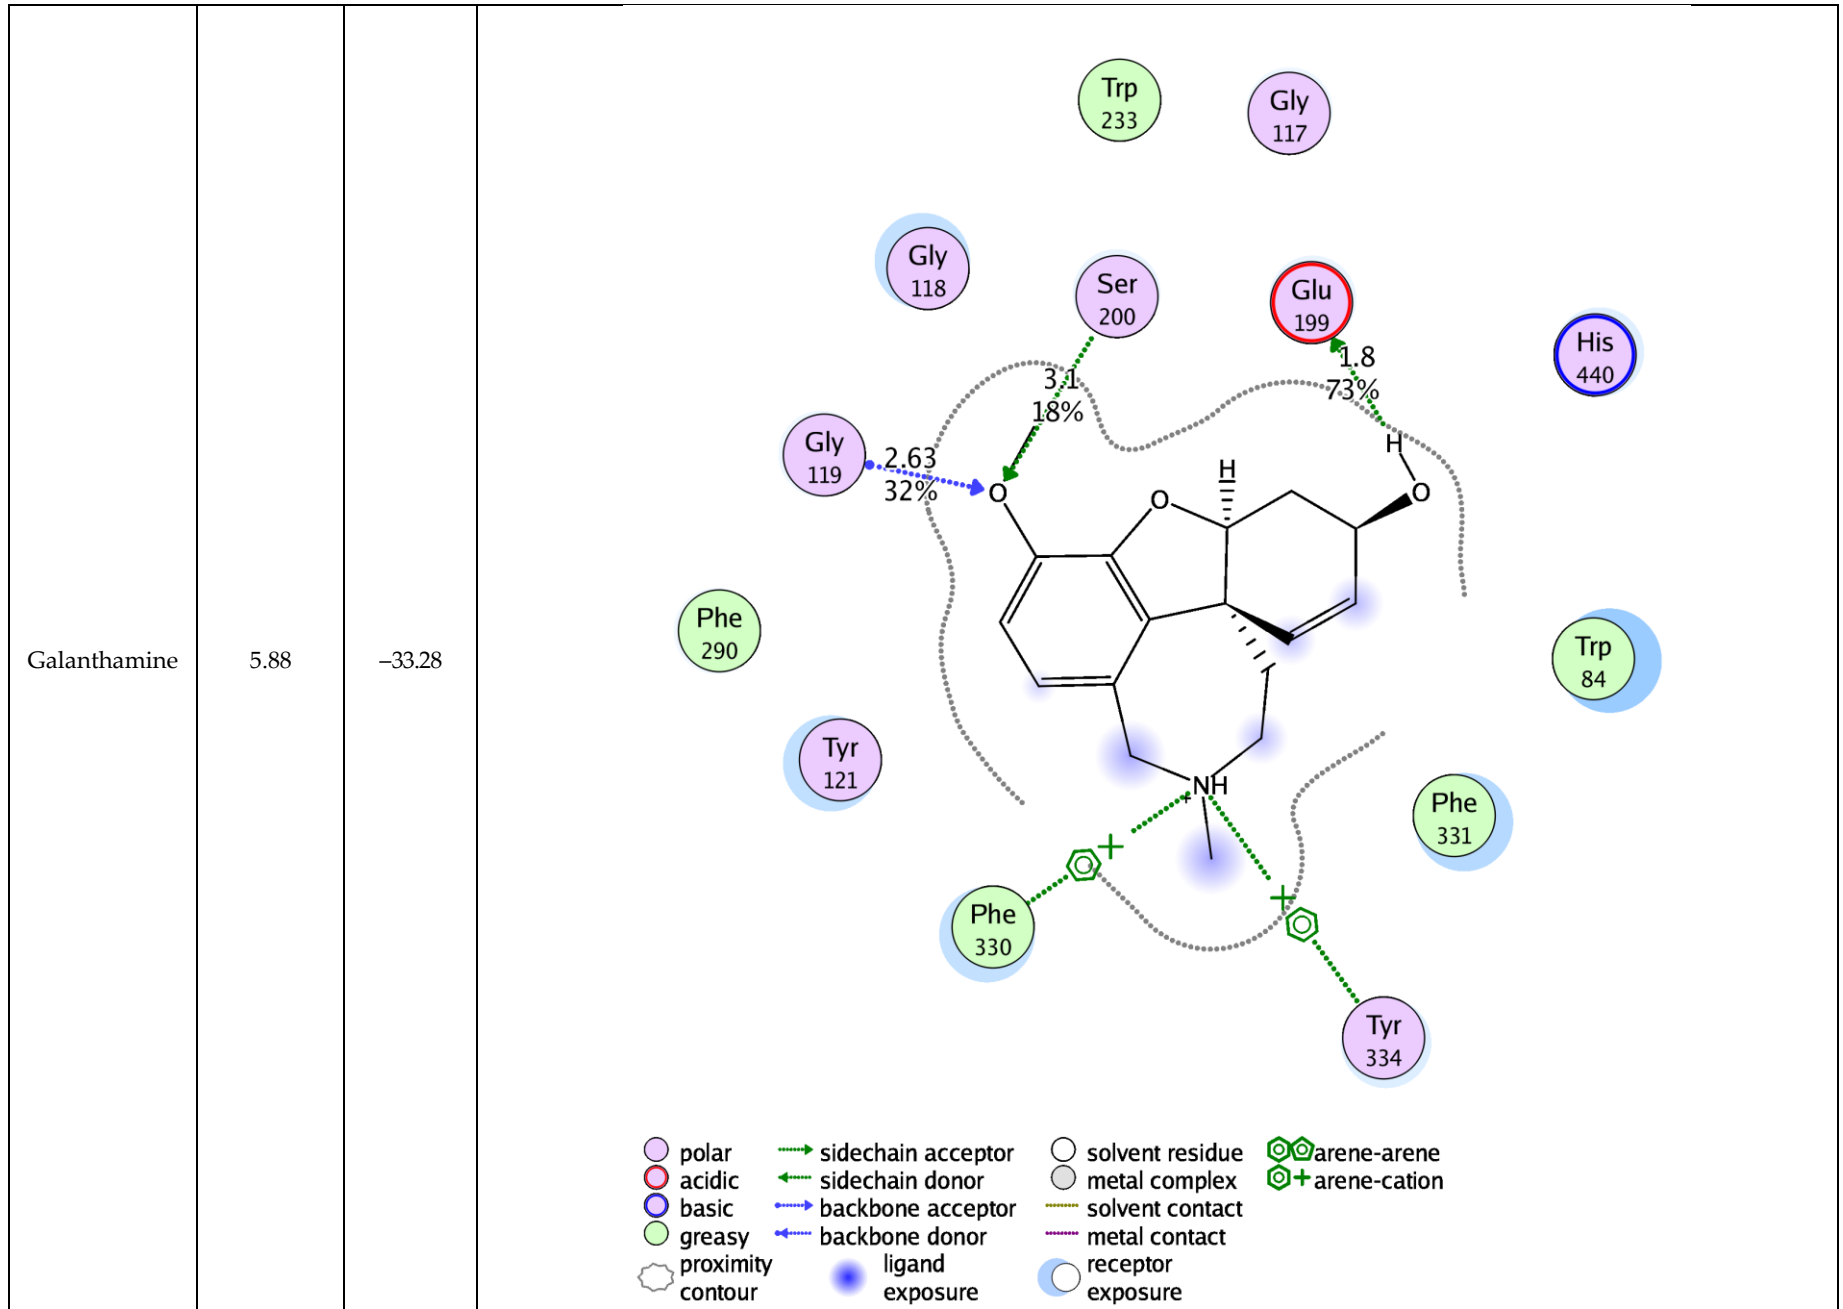

**Table S6.** Docking results and ligand interaction (Co-crystallized 6EQM)

| Compound          | Observed pIC50 | Docking score (kJ.mol <sup>-1</sup> ) | Interactions |
|-------------------|----------------|---------------------------------------|--------------|
| B1<br>(Baicalein) | 4.16           | -17.64                                |              |

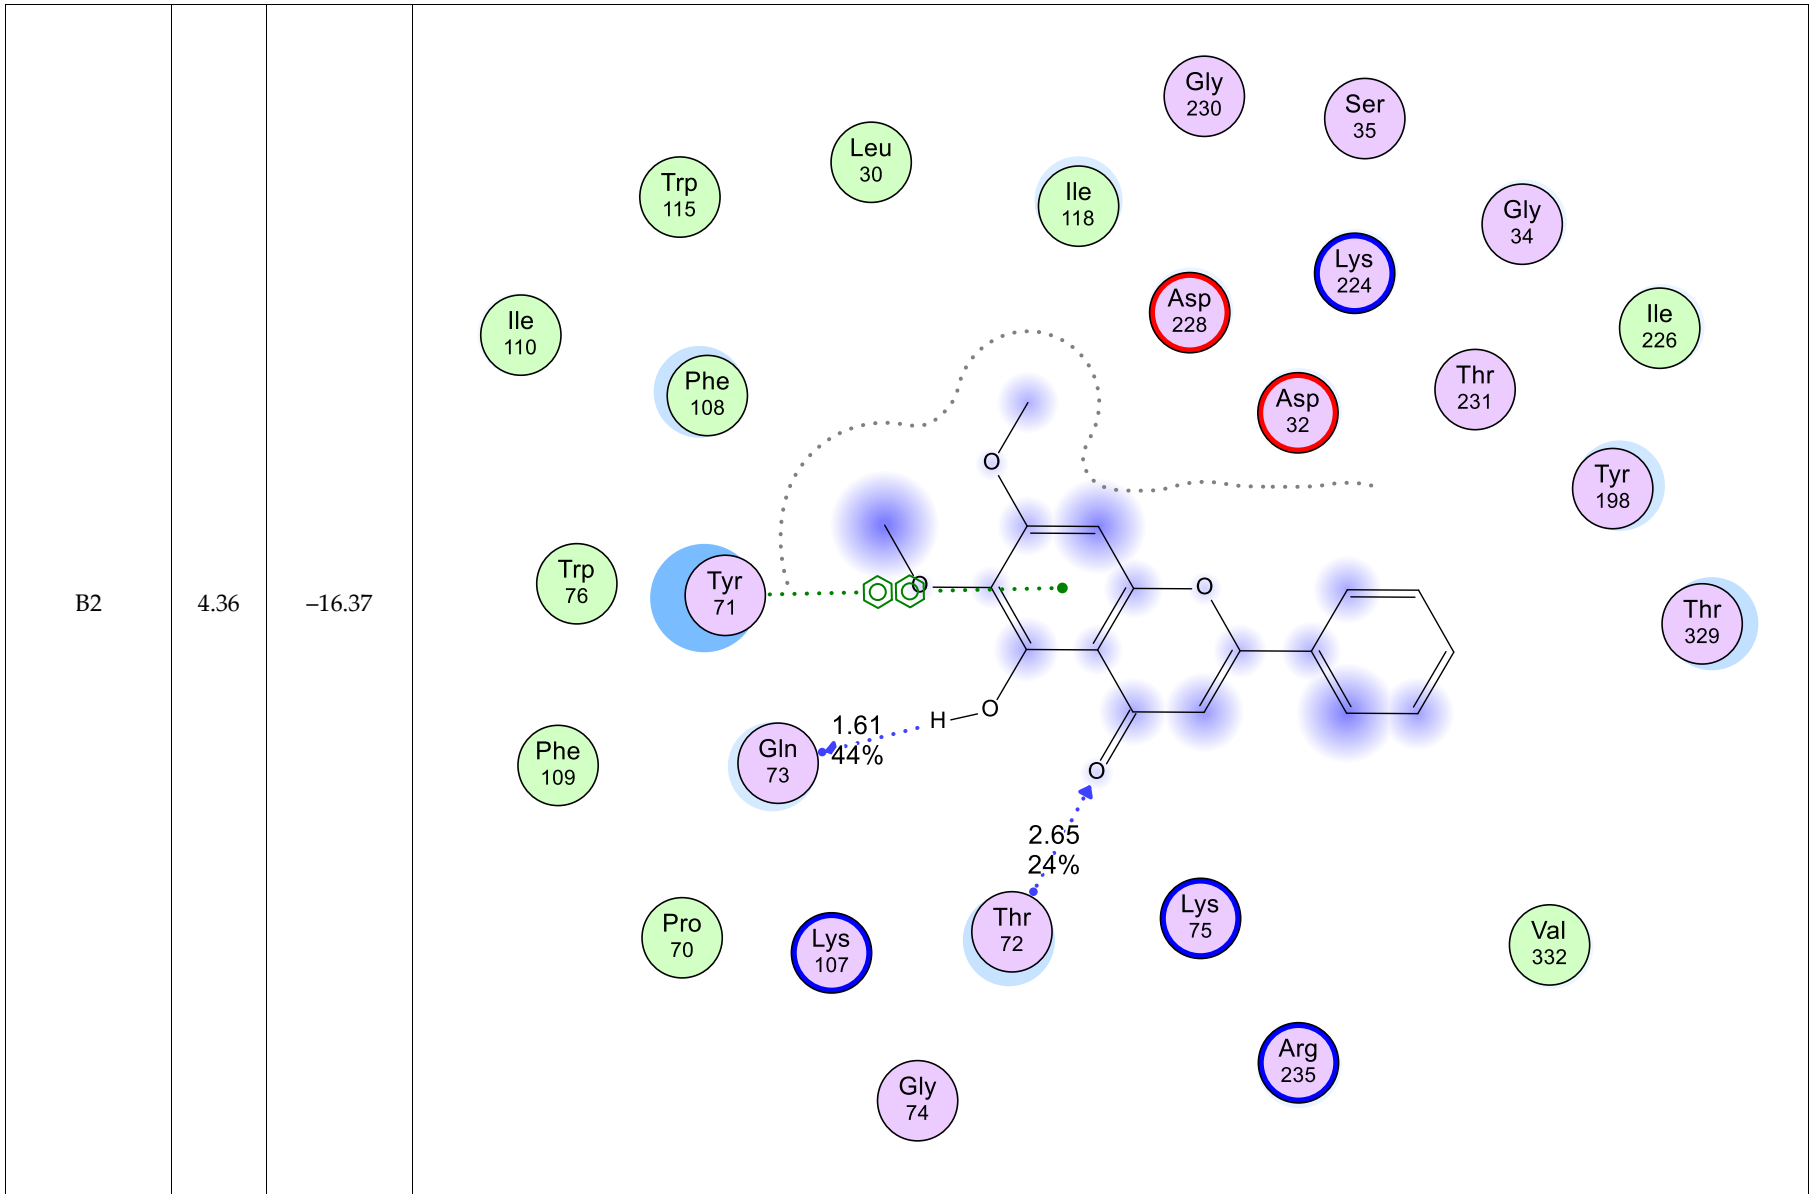

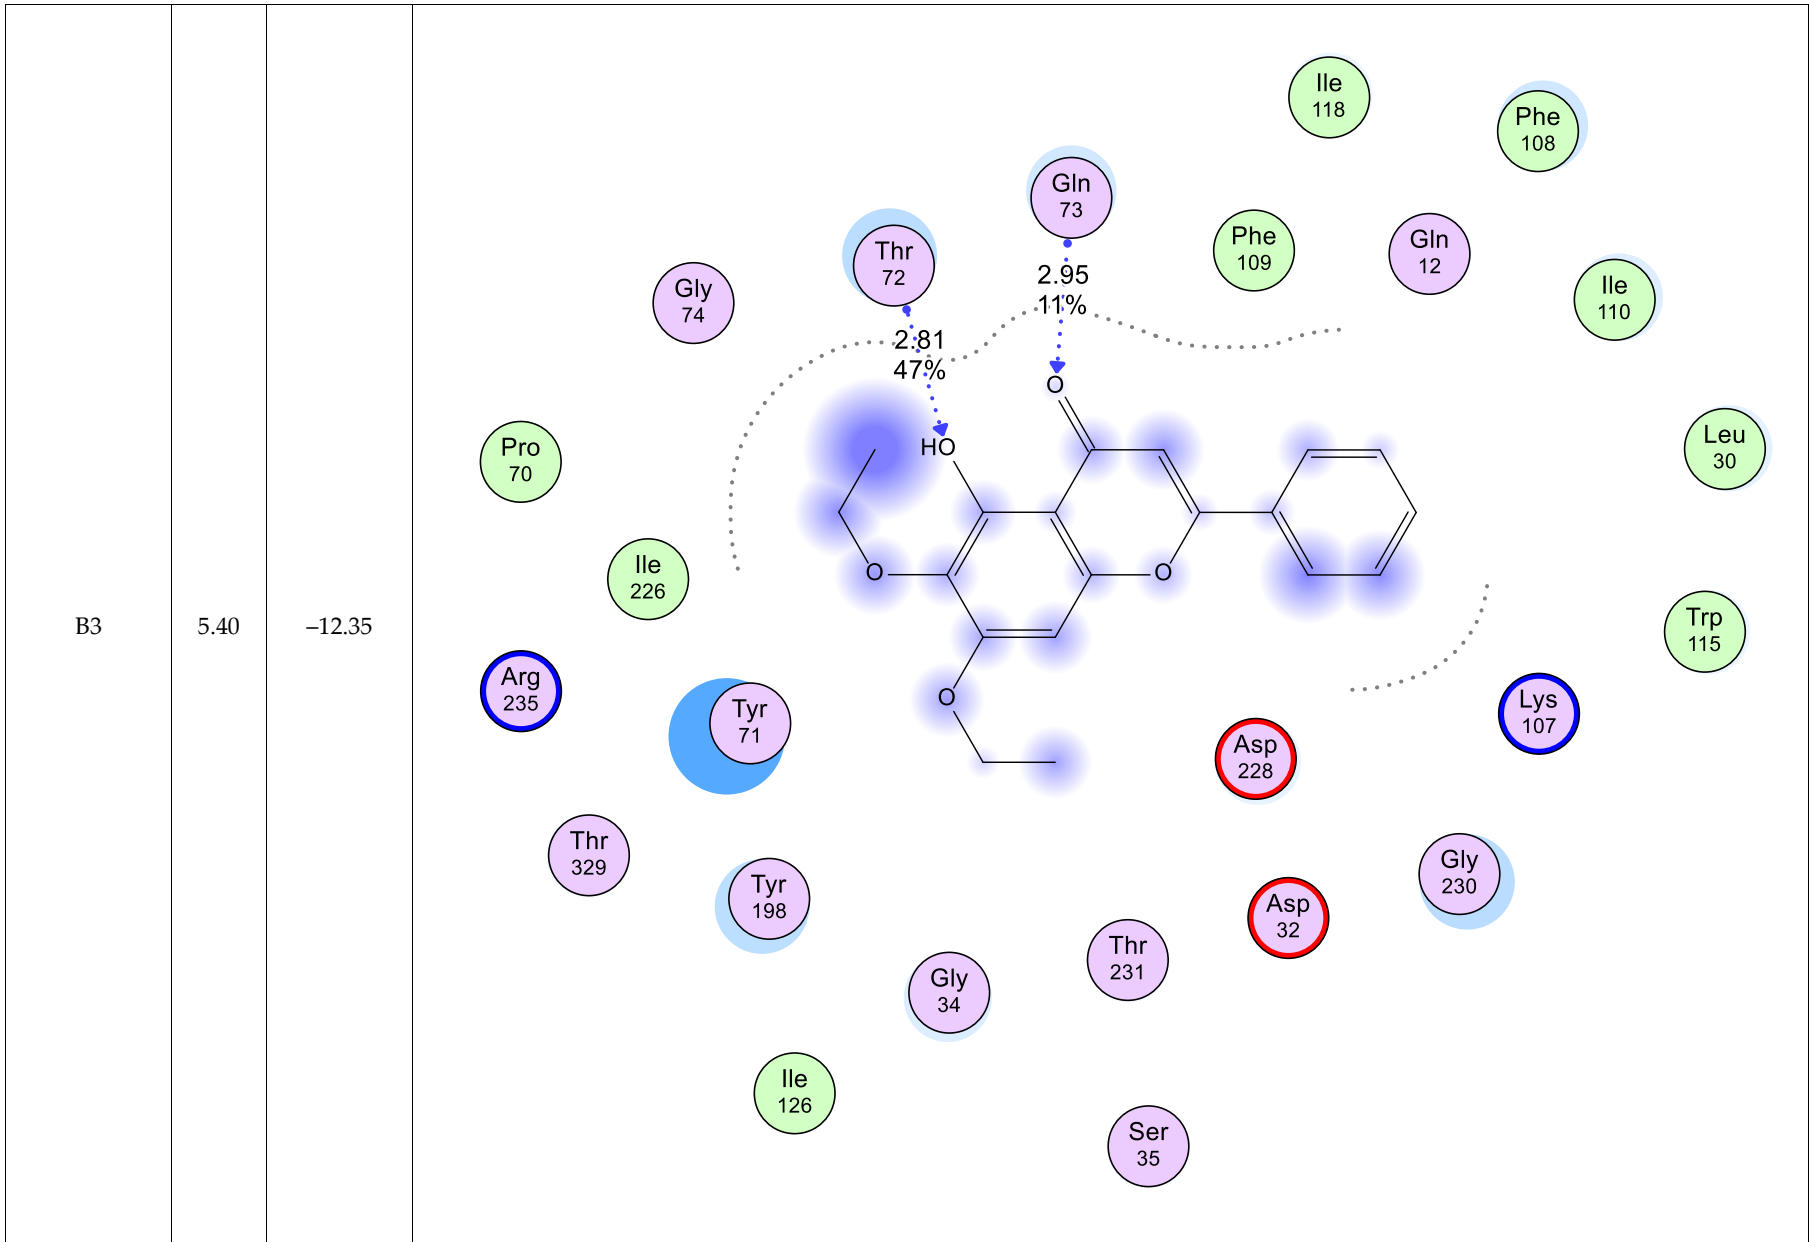



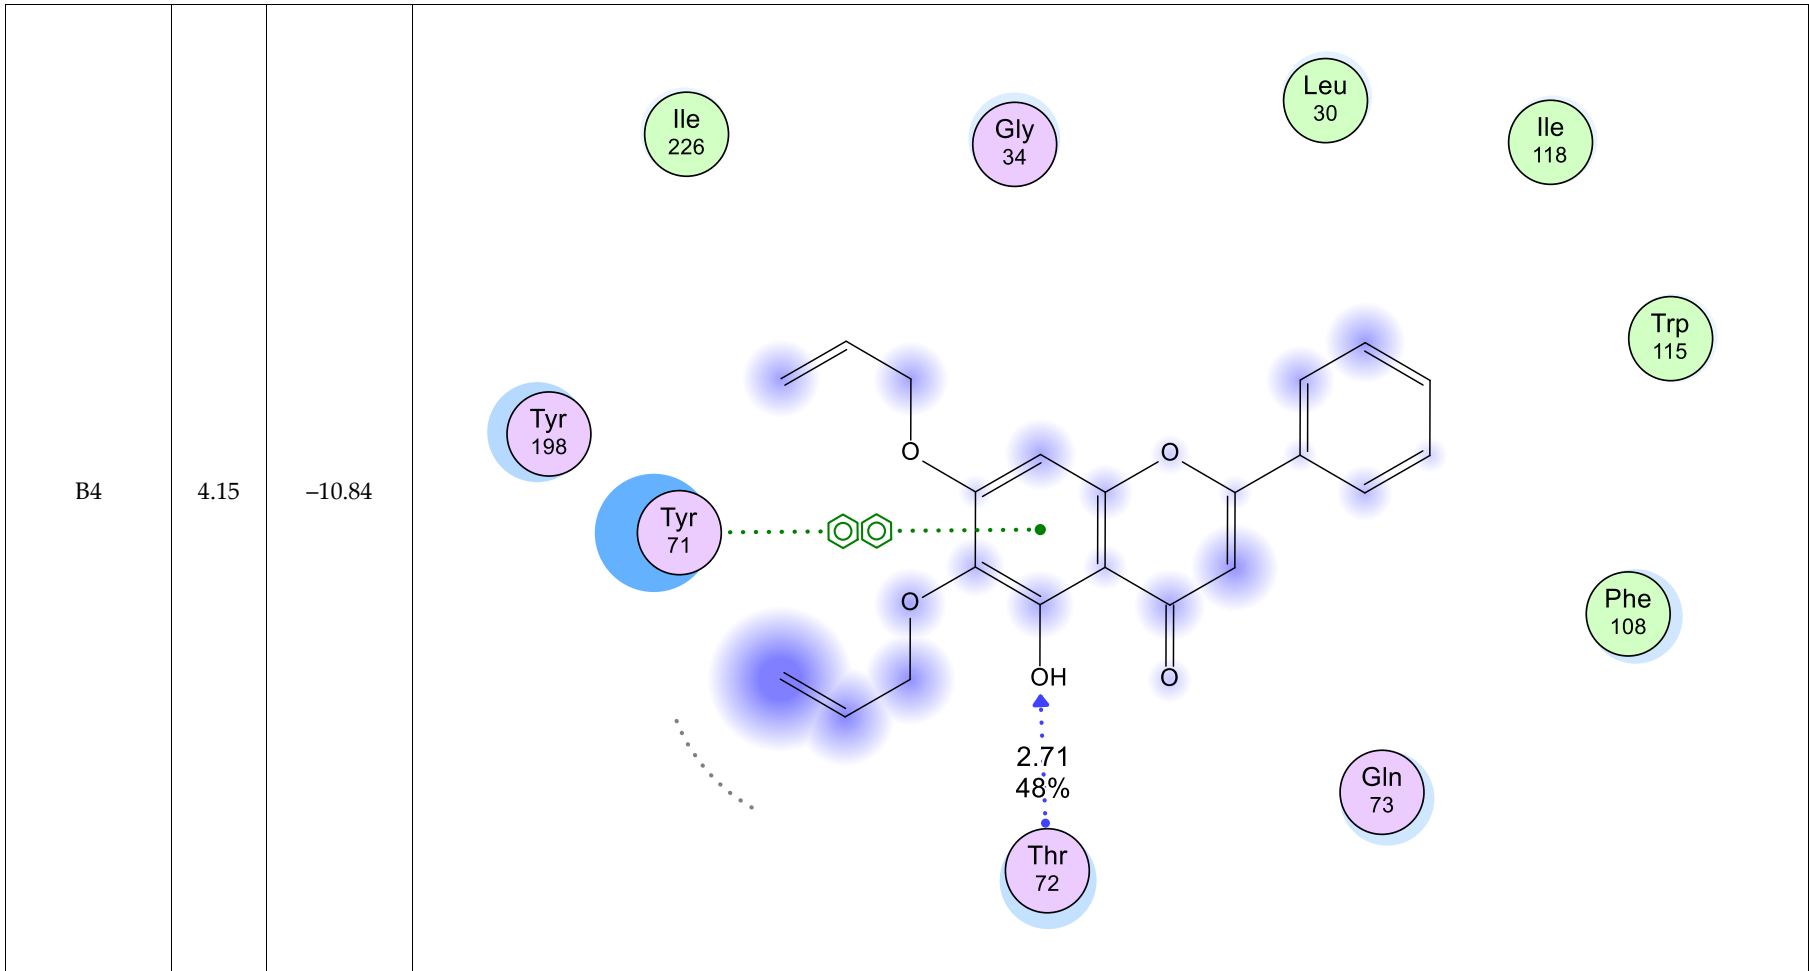

B5

4.77

-8.29

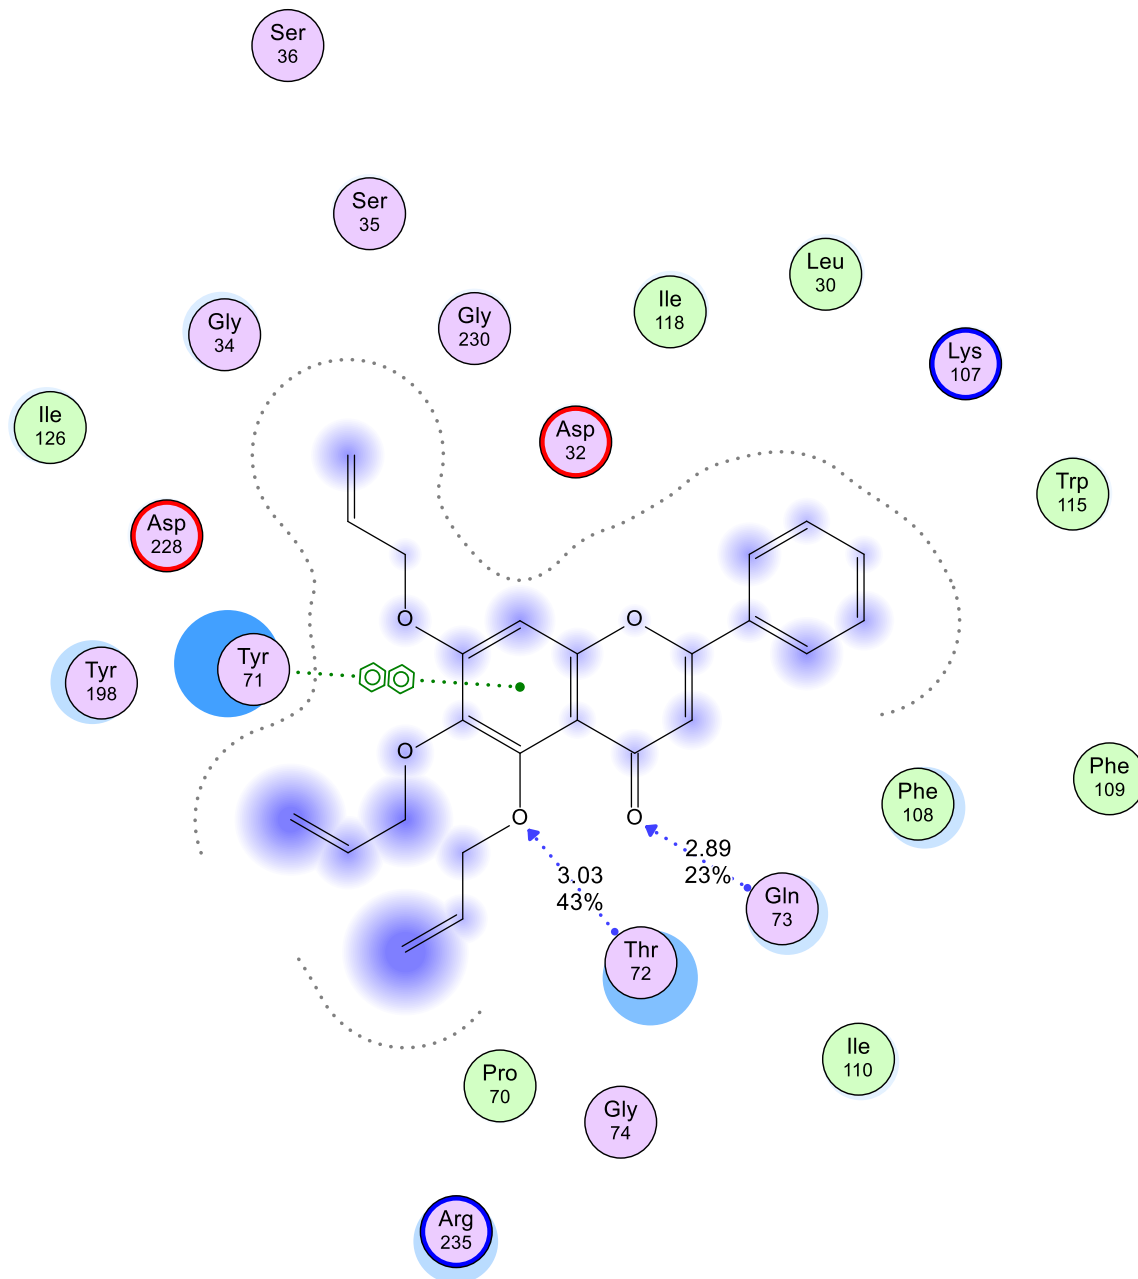



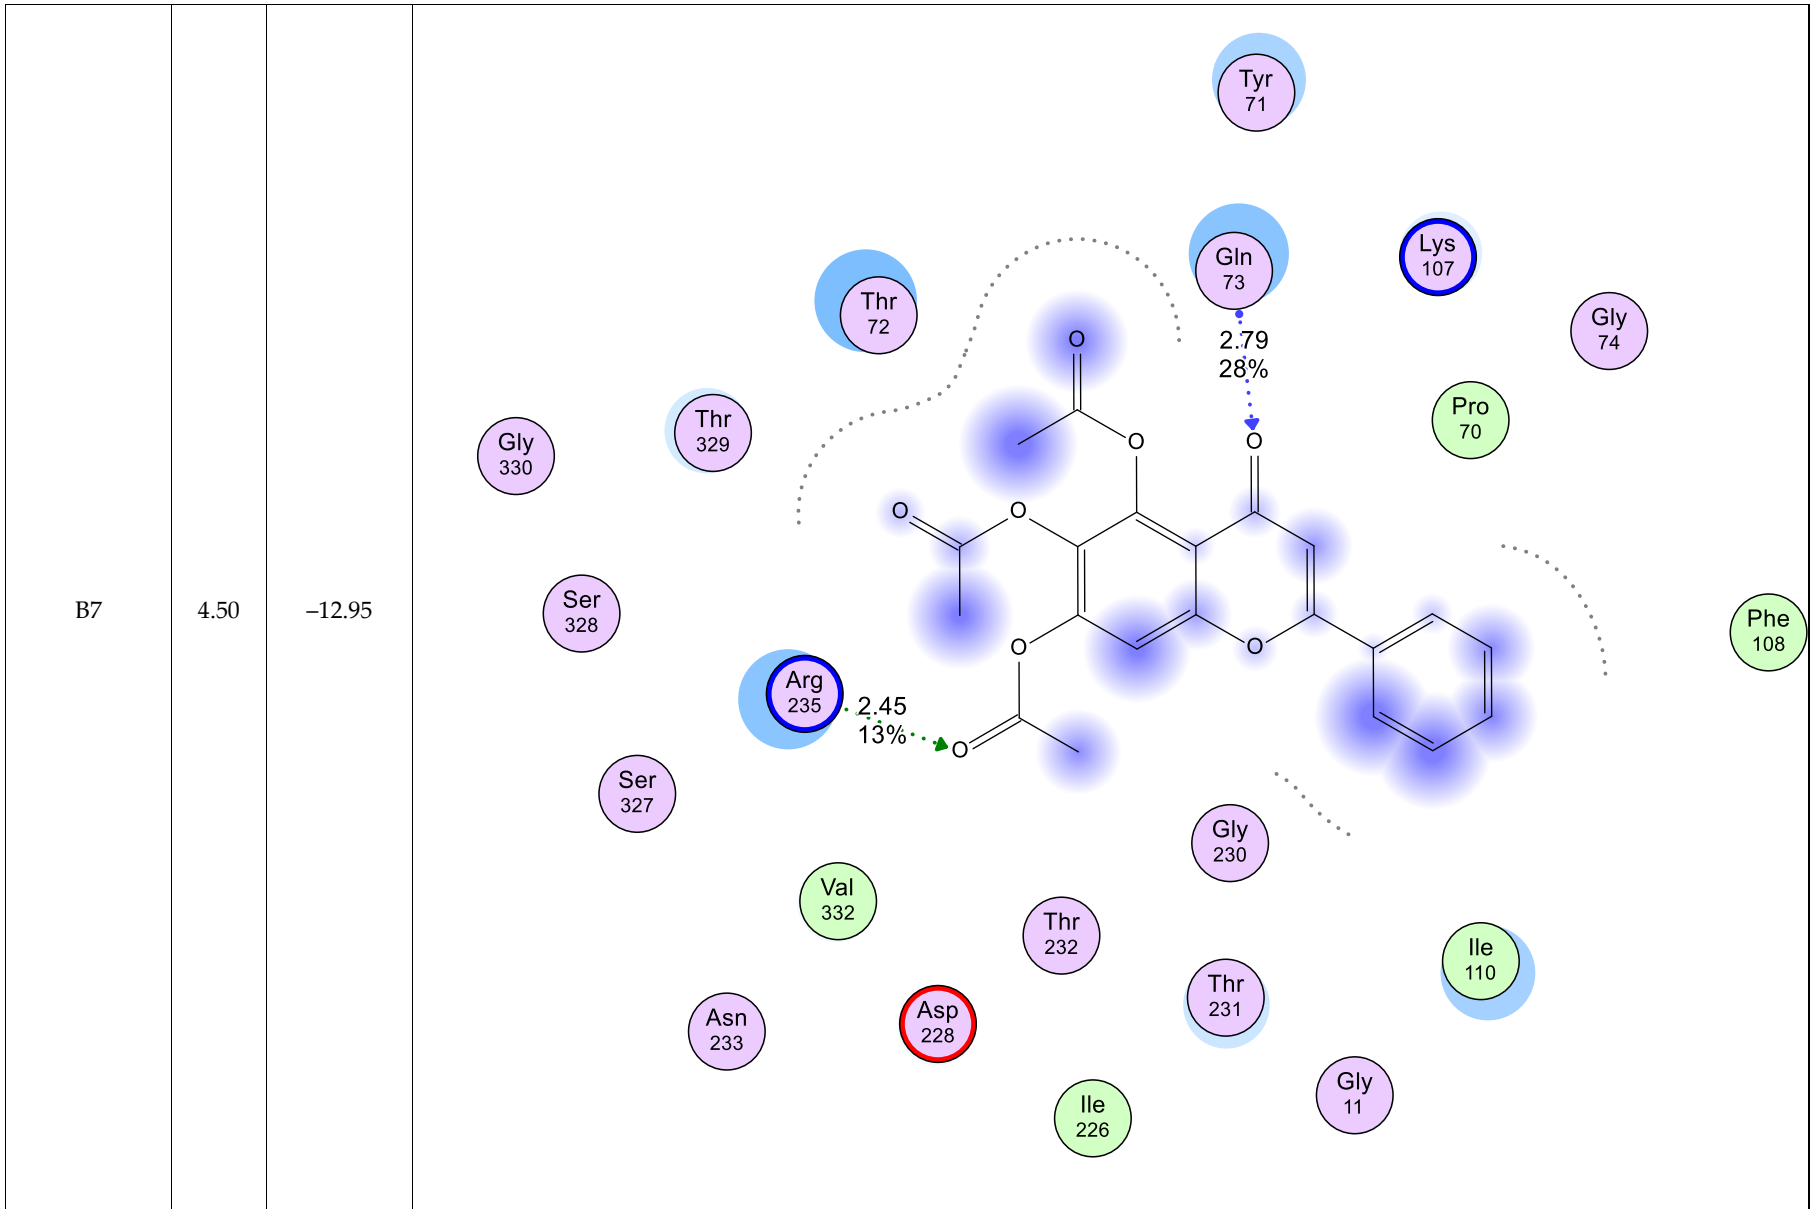

B8

4.65

-10.75

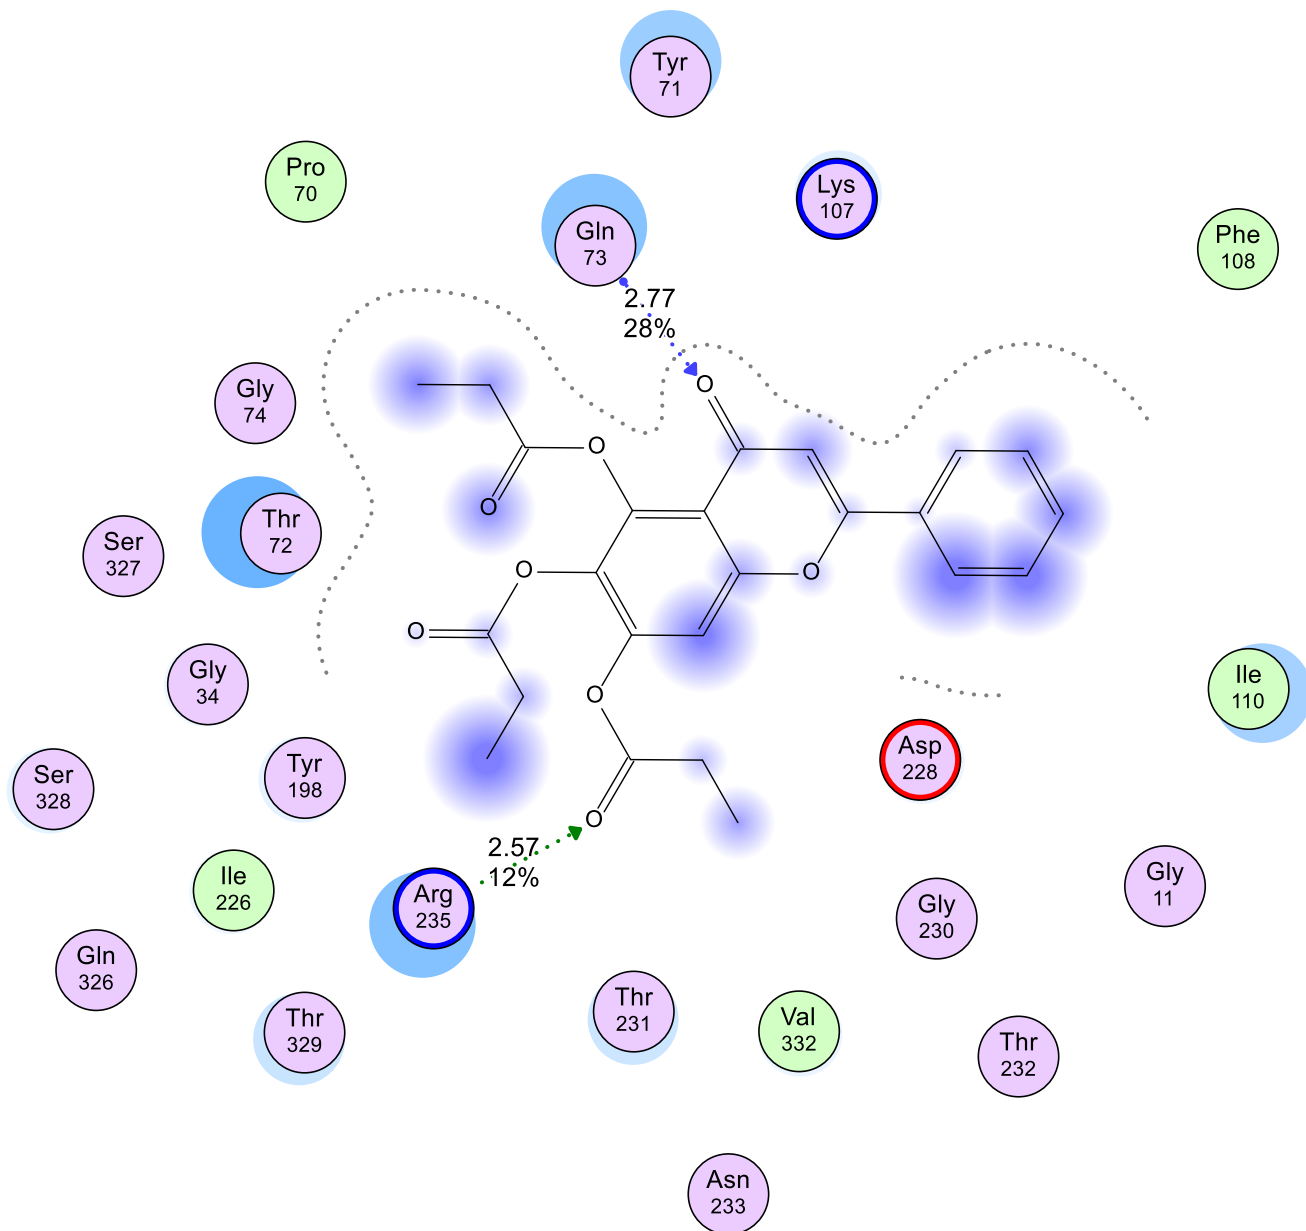

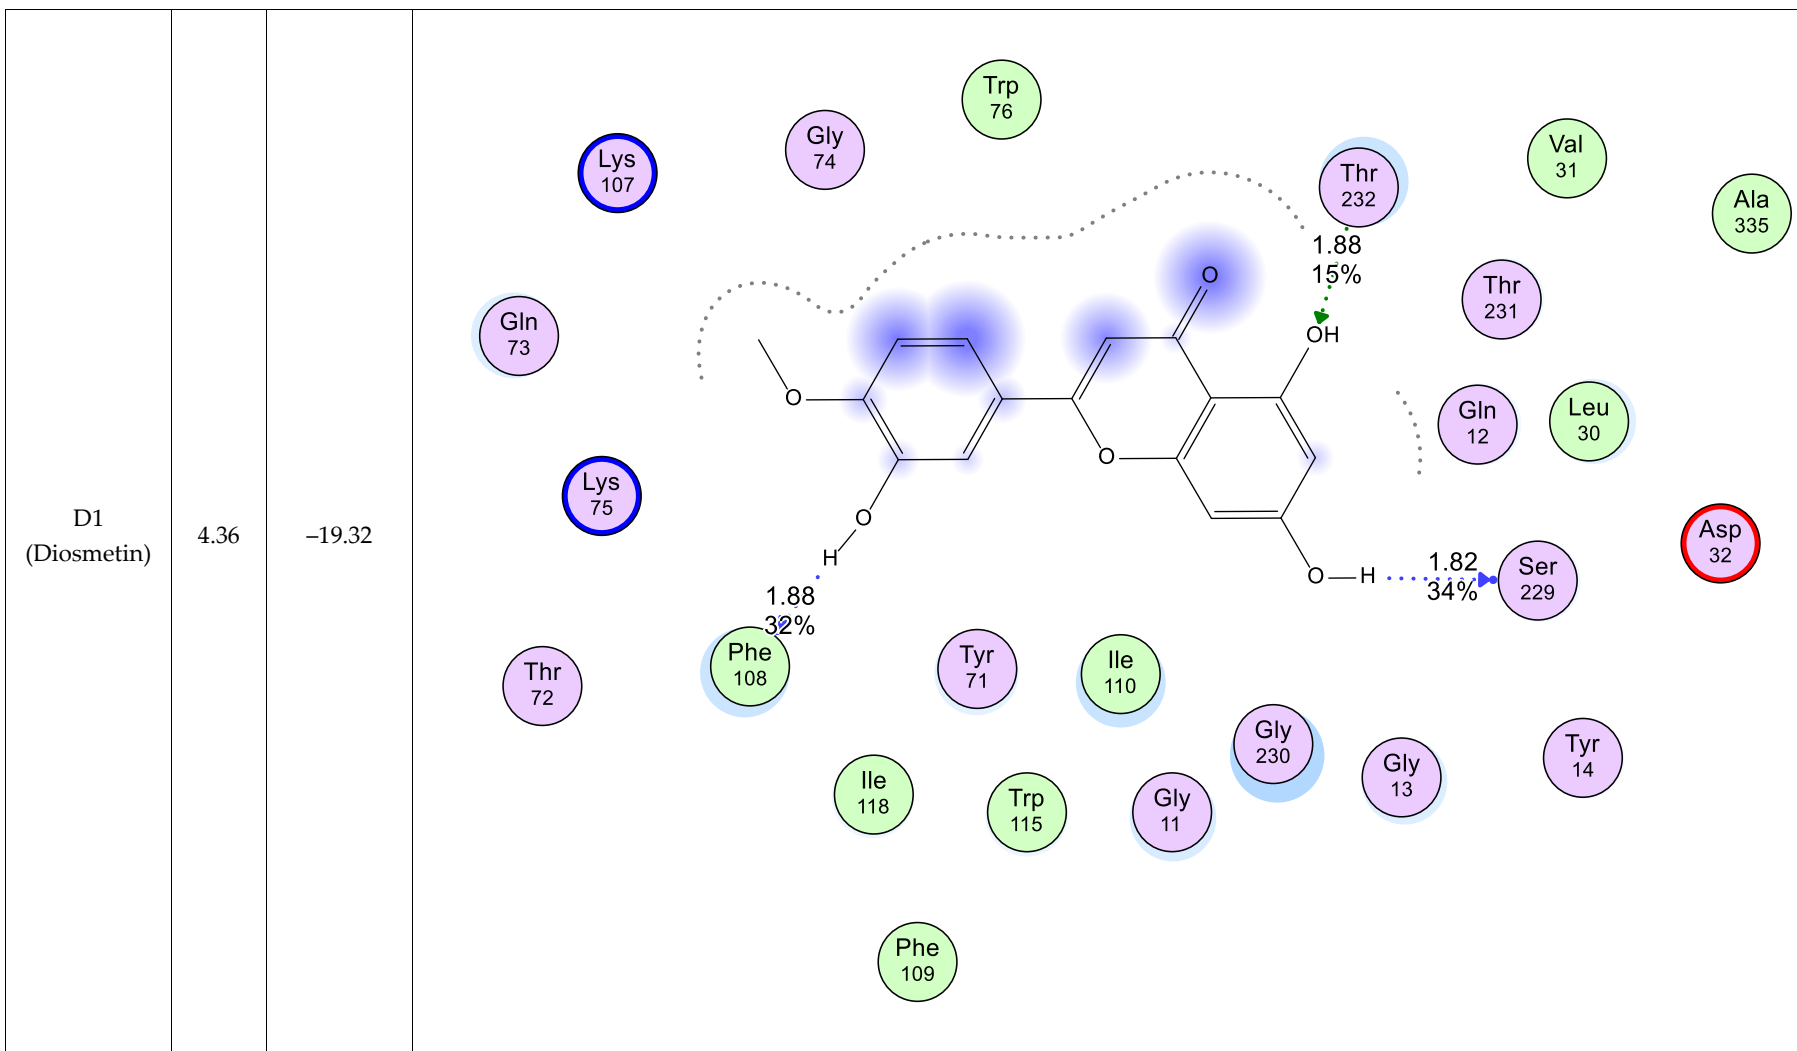

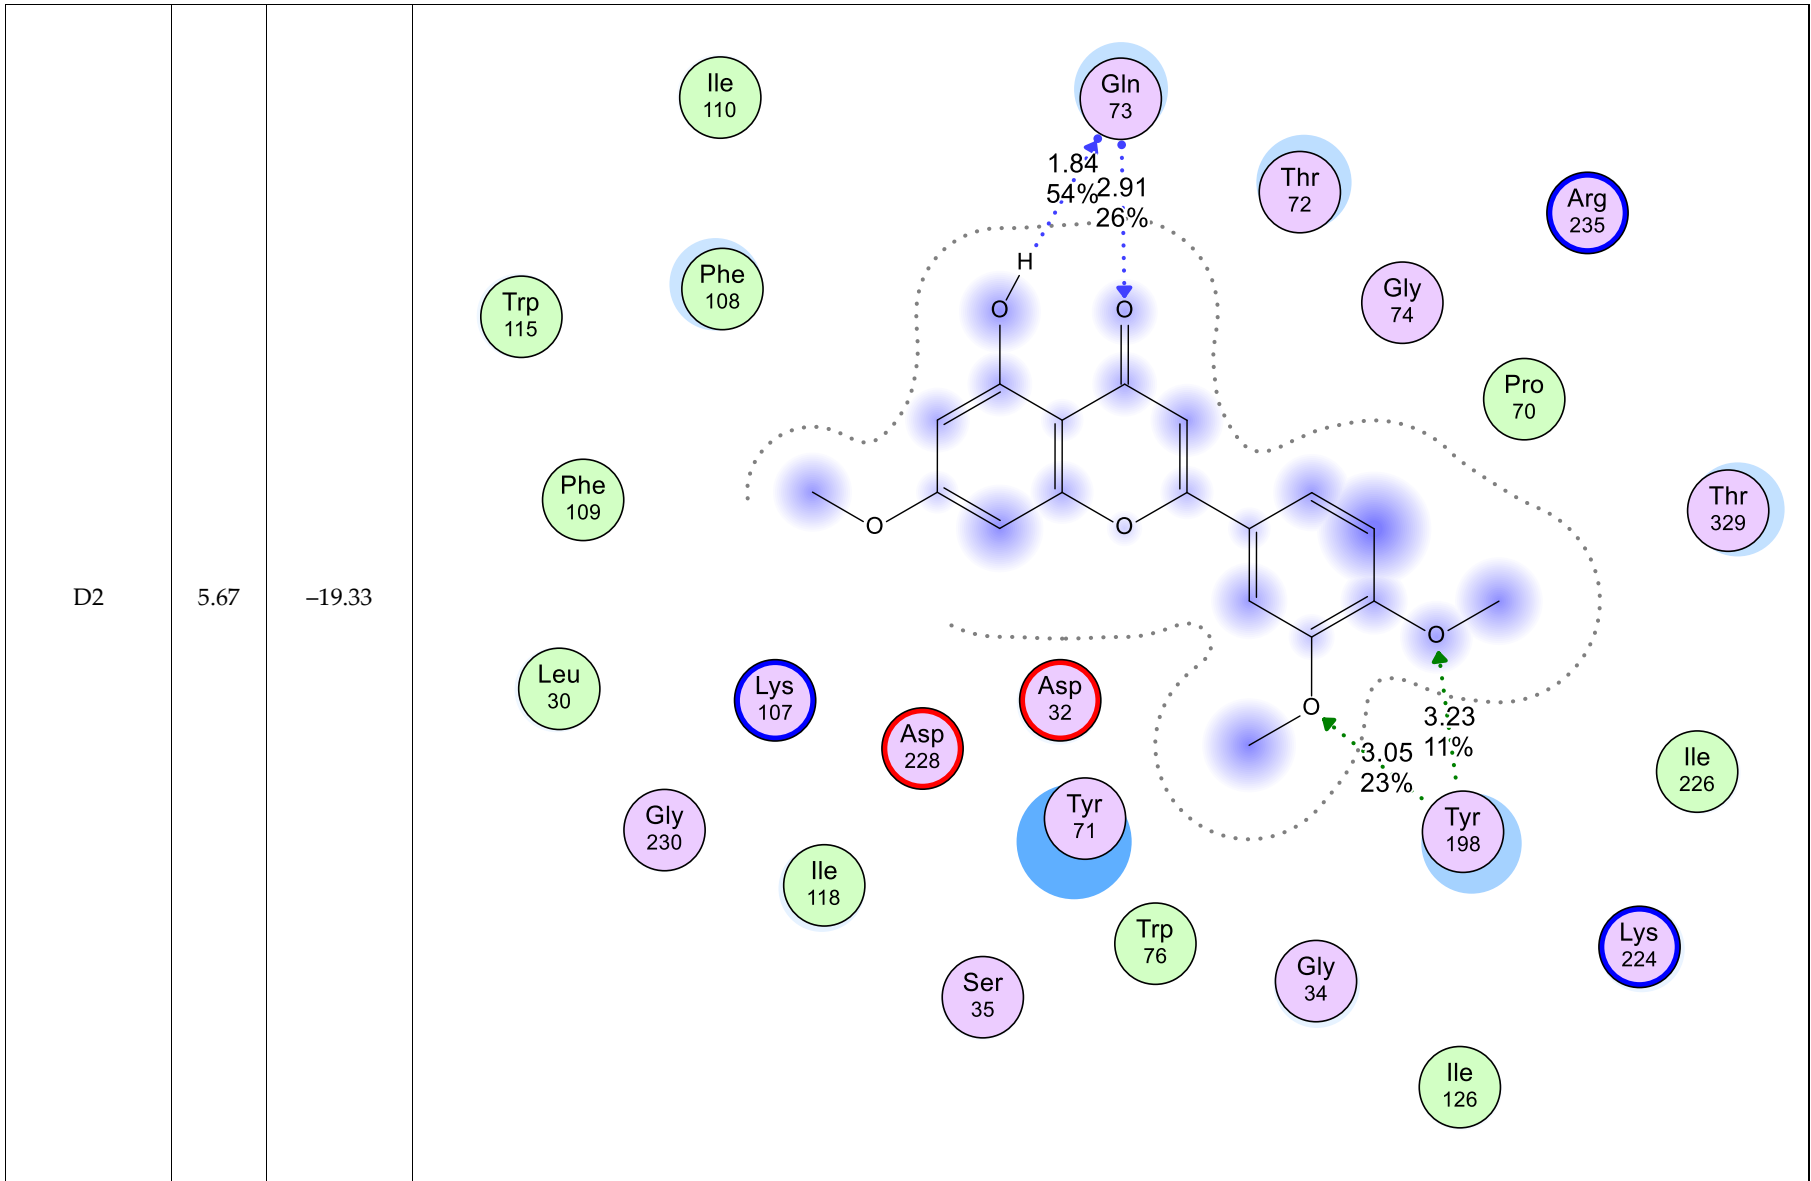

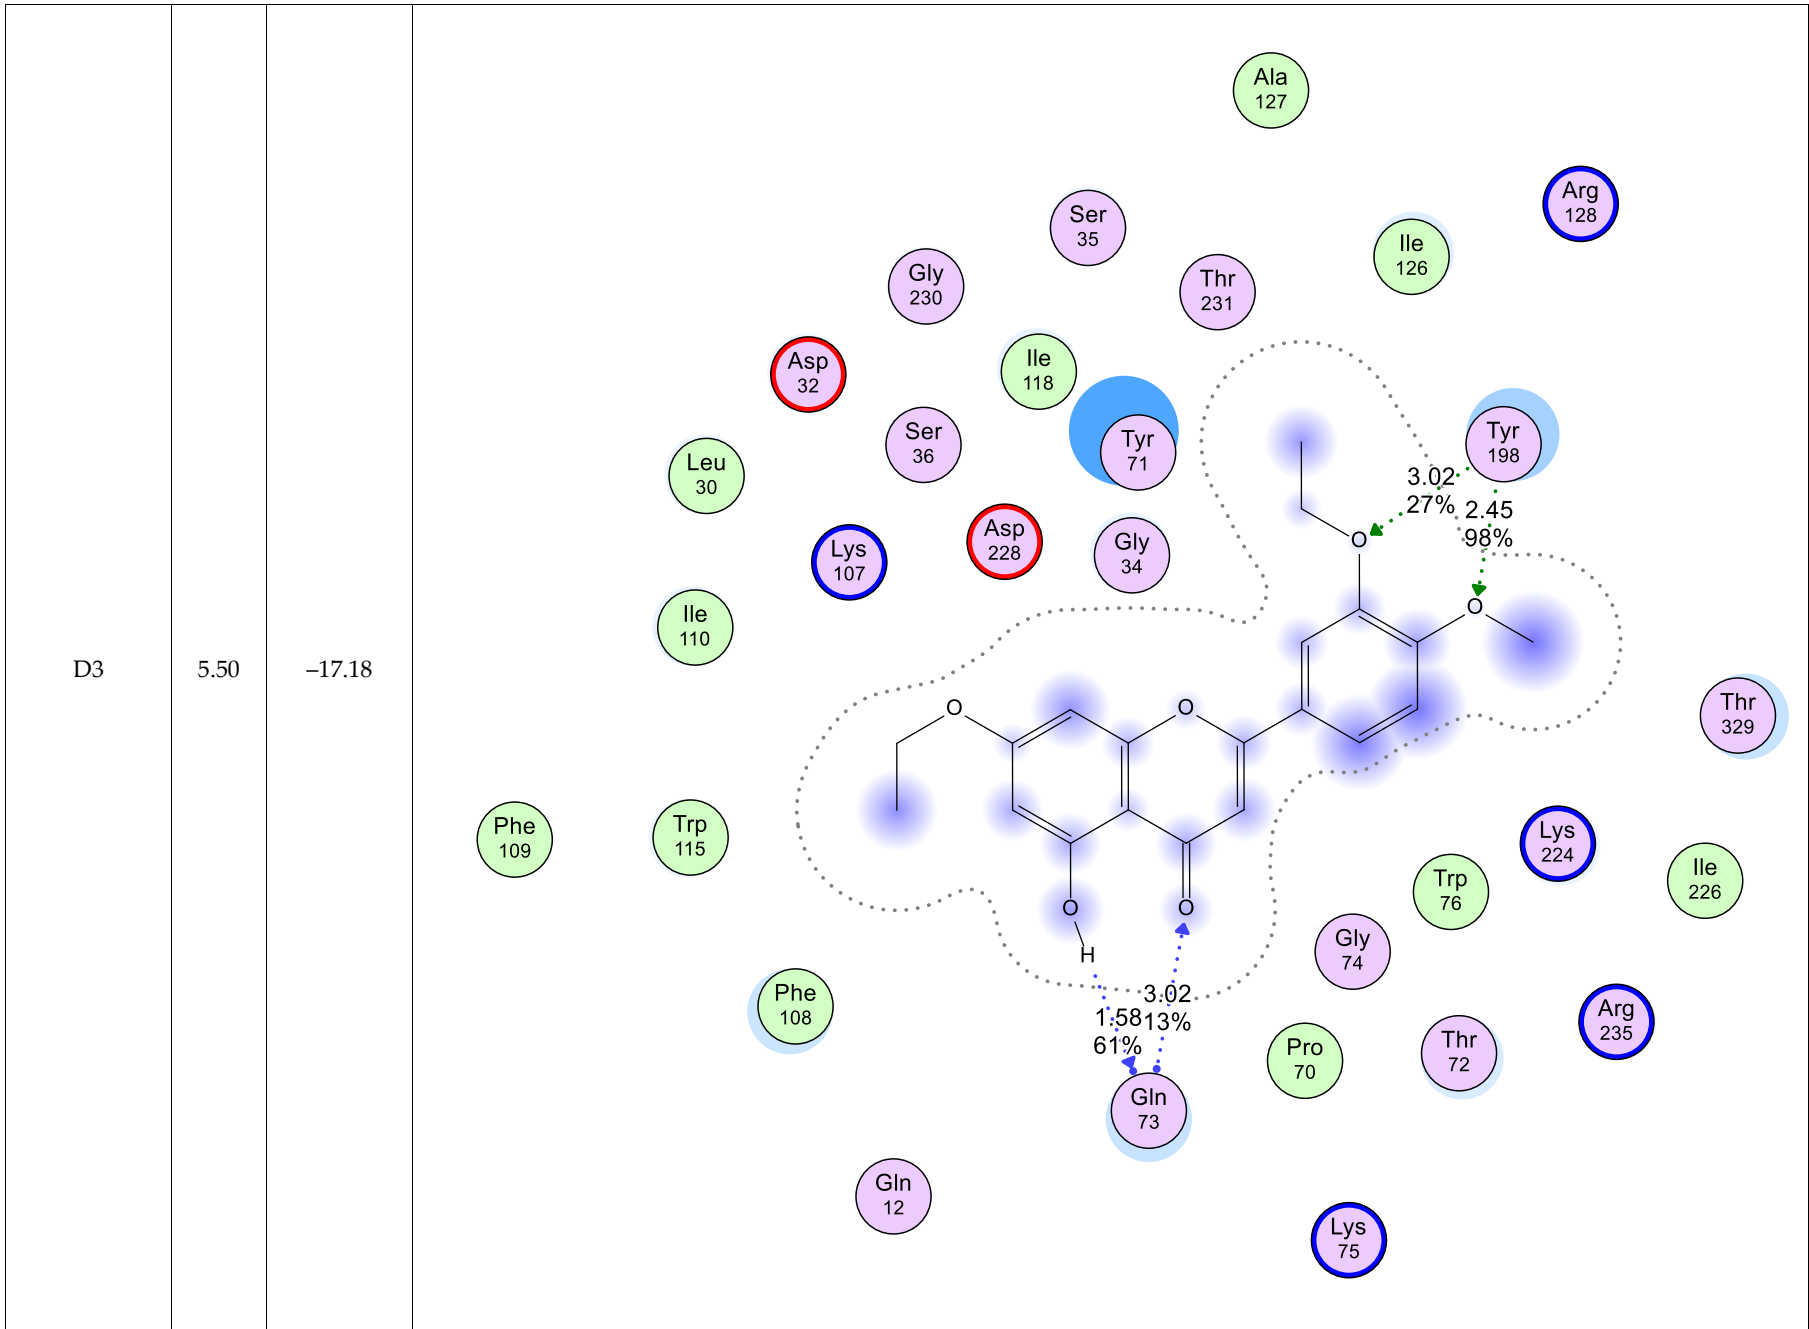



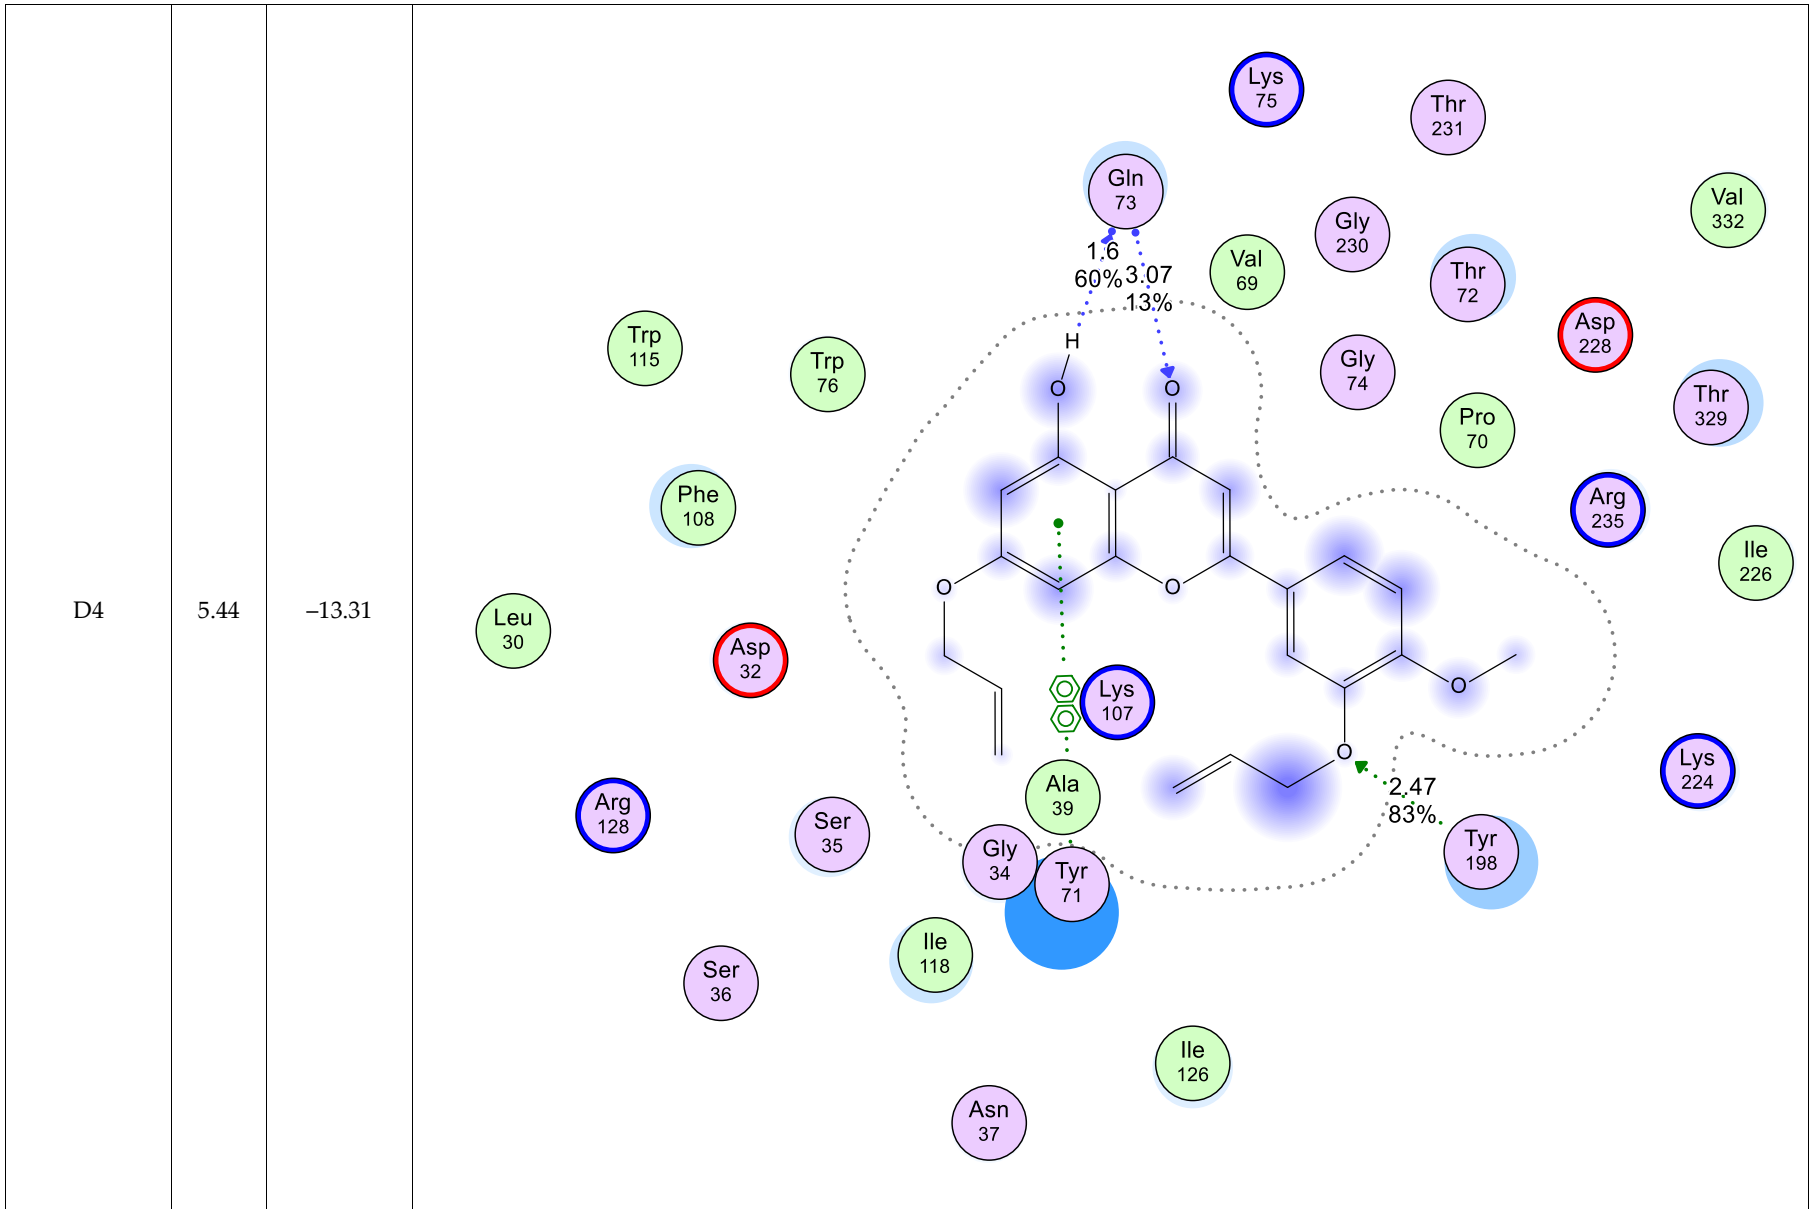

D5

5.78

-13.46

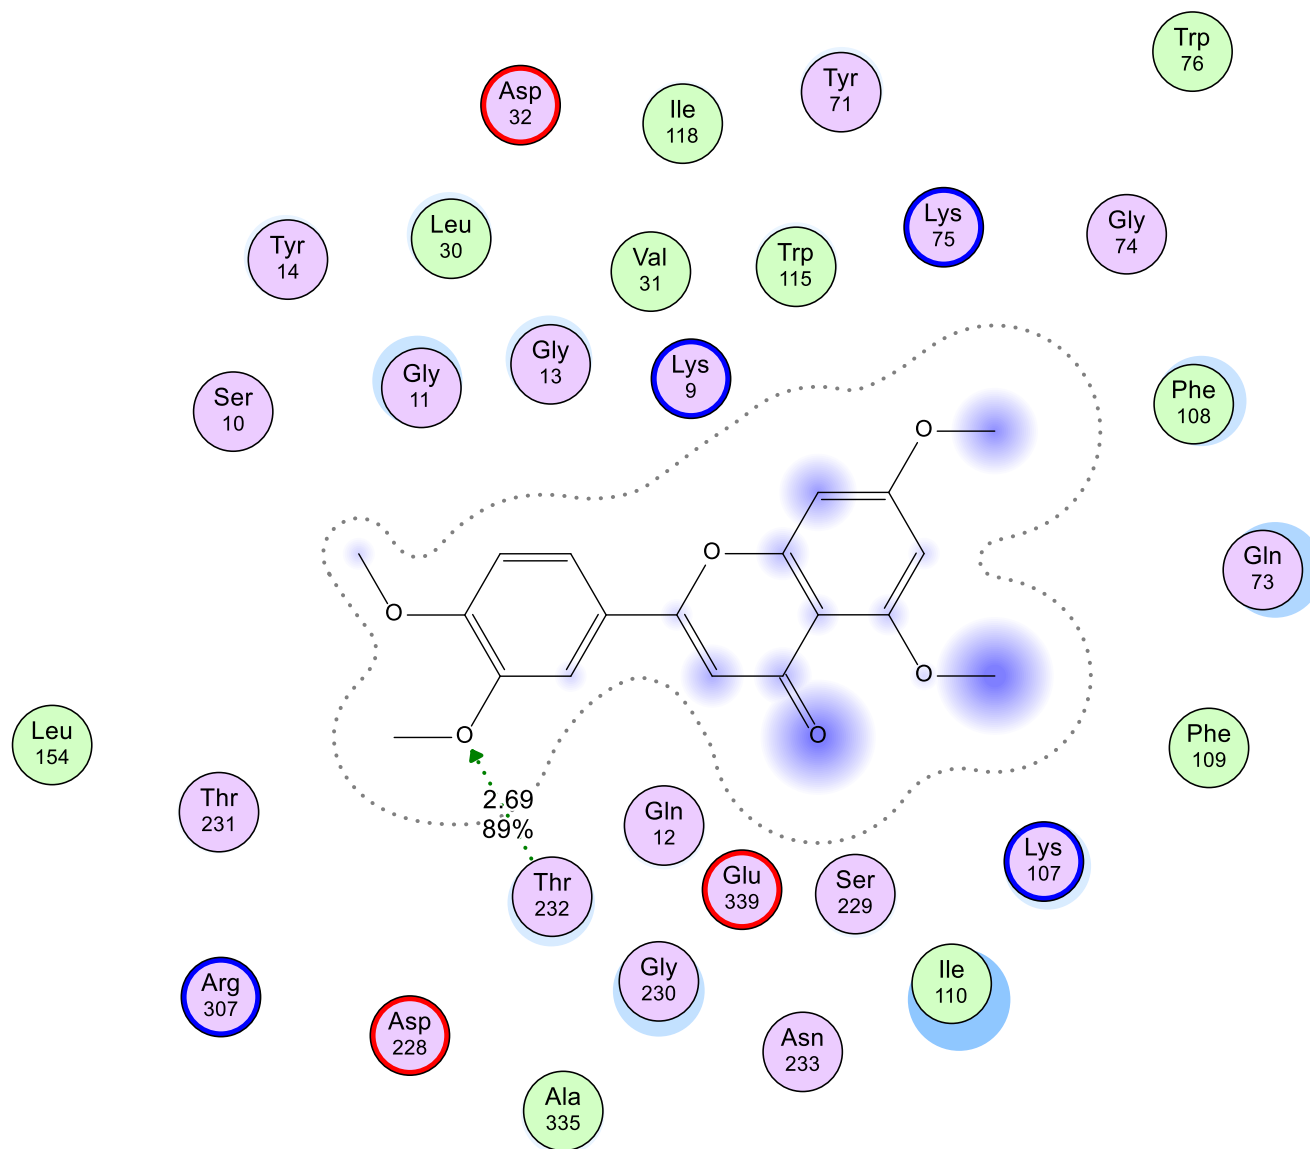

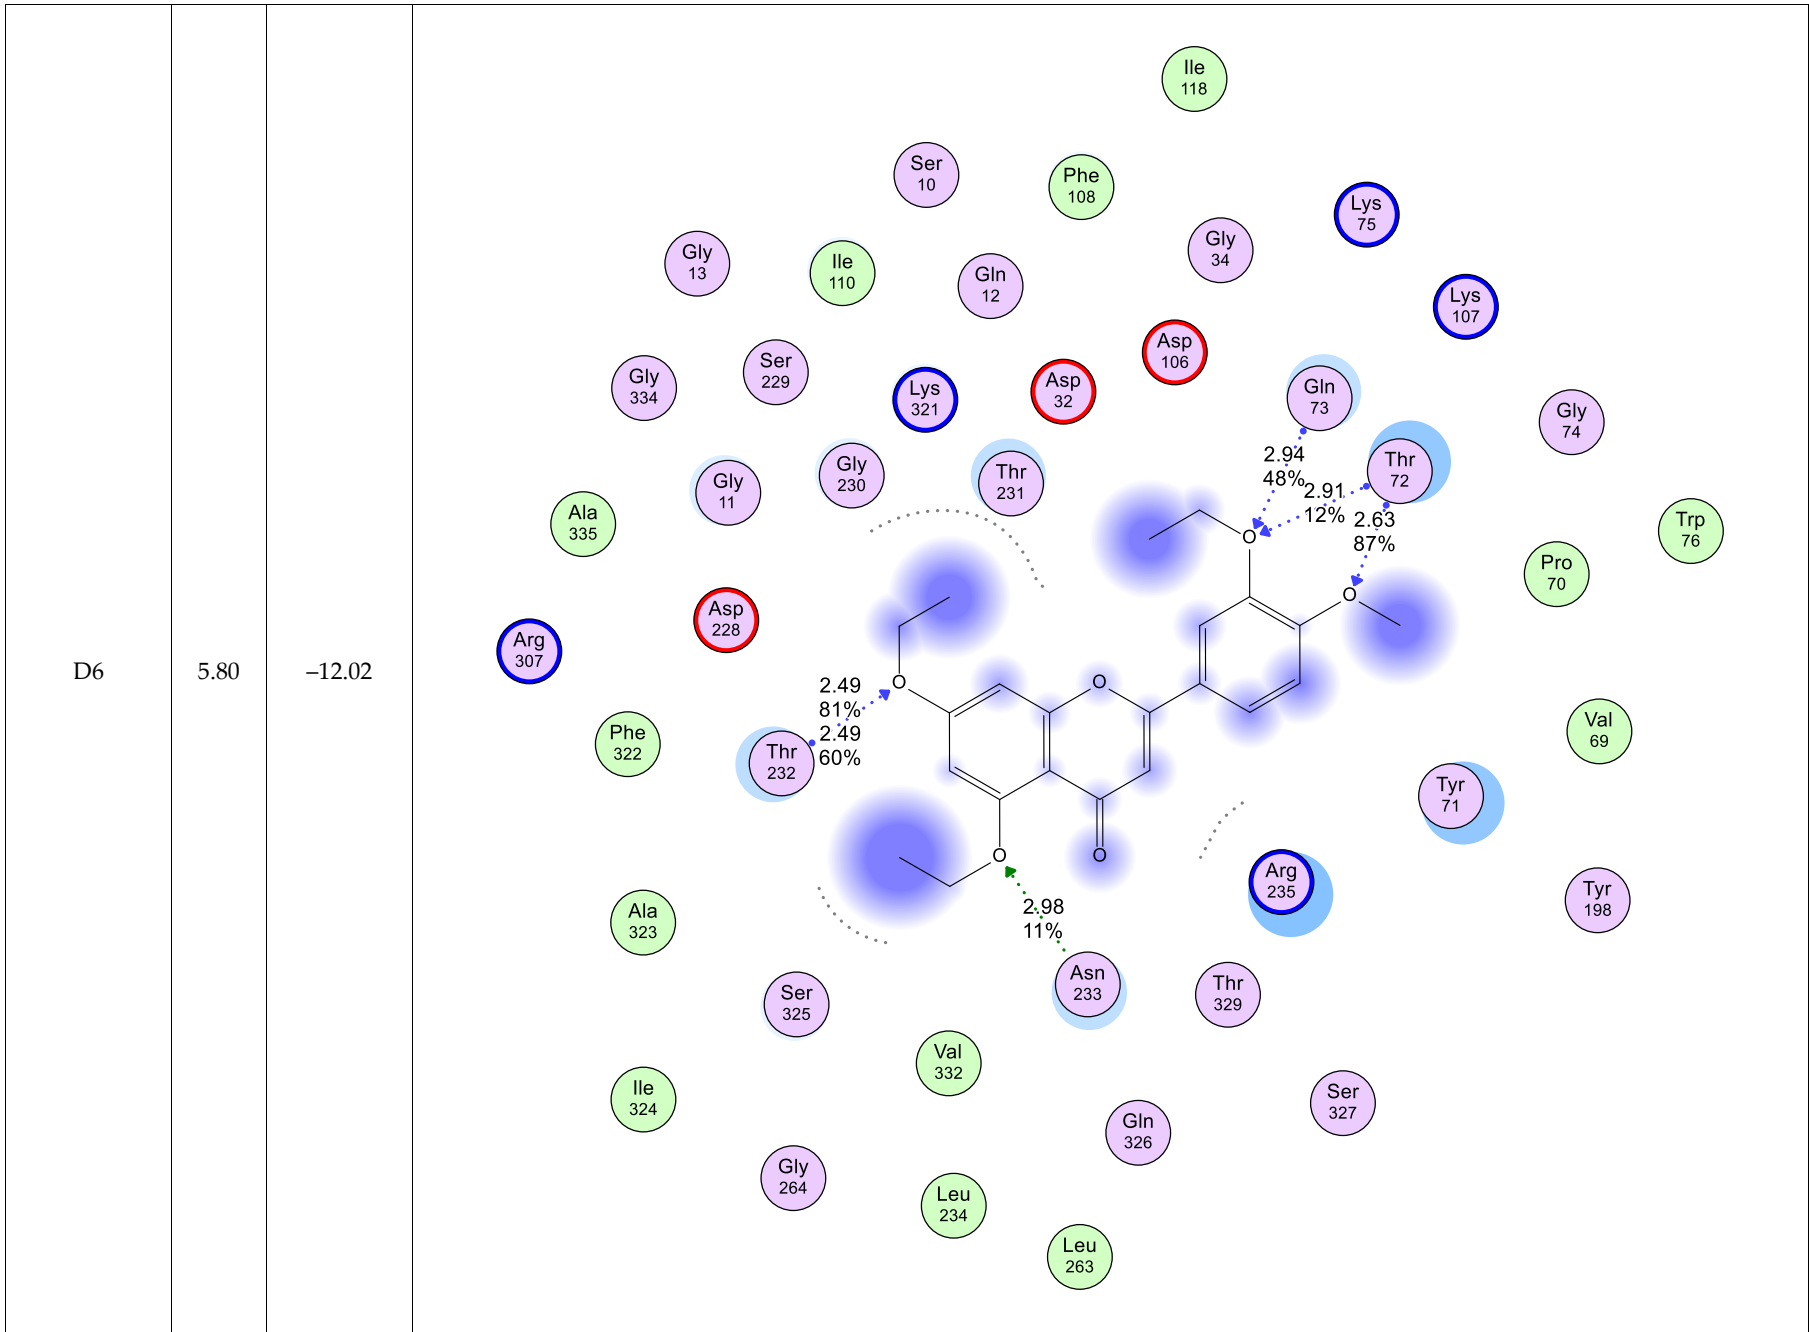

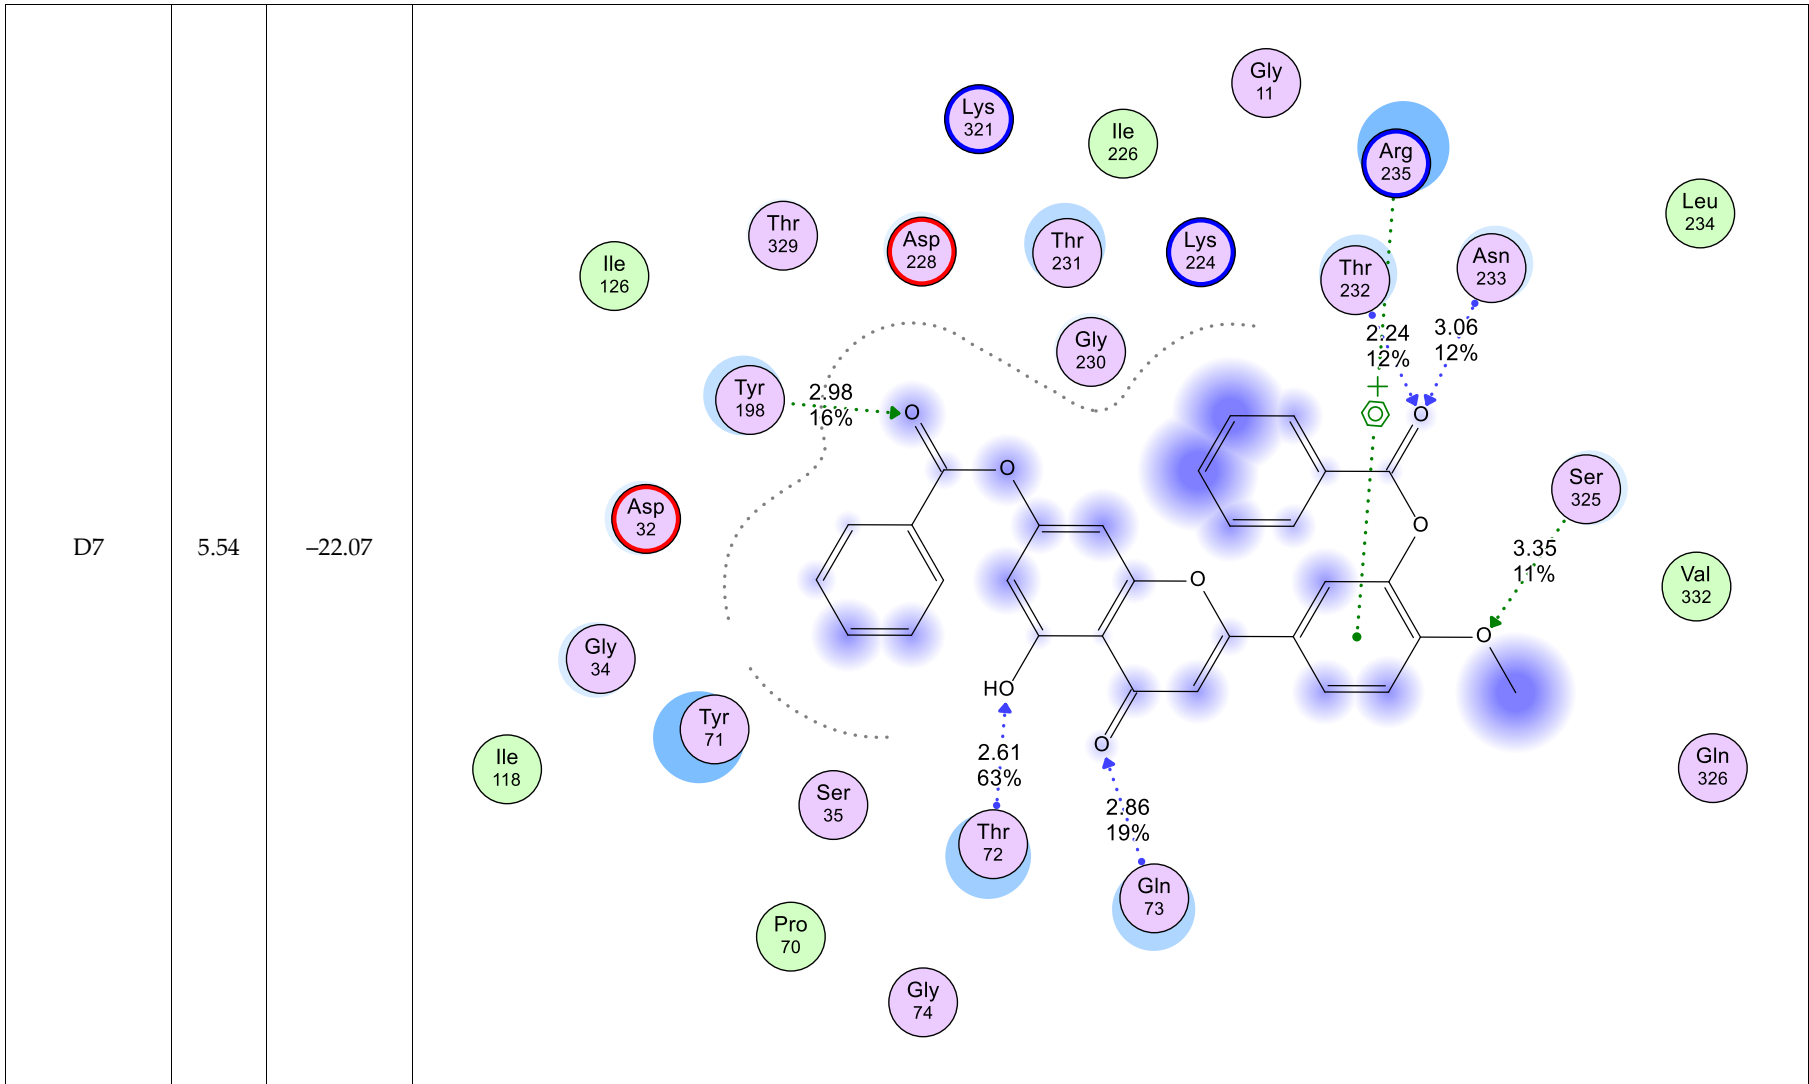

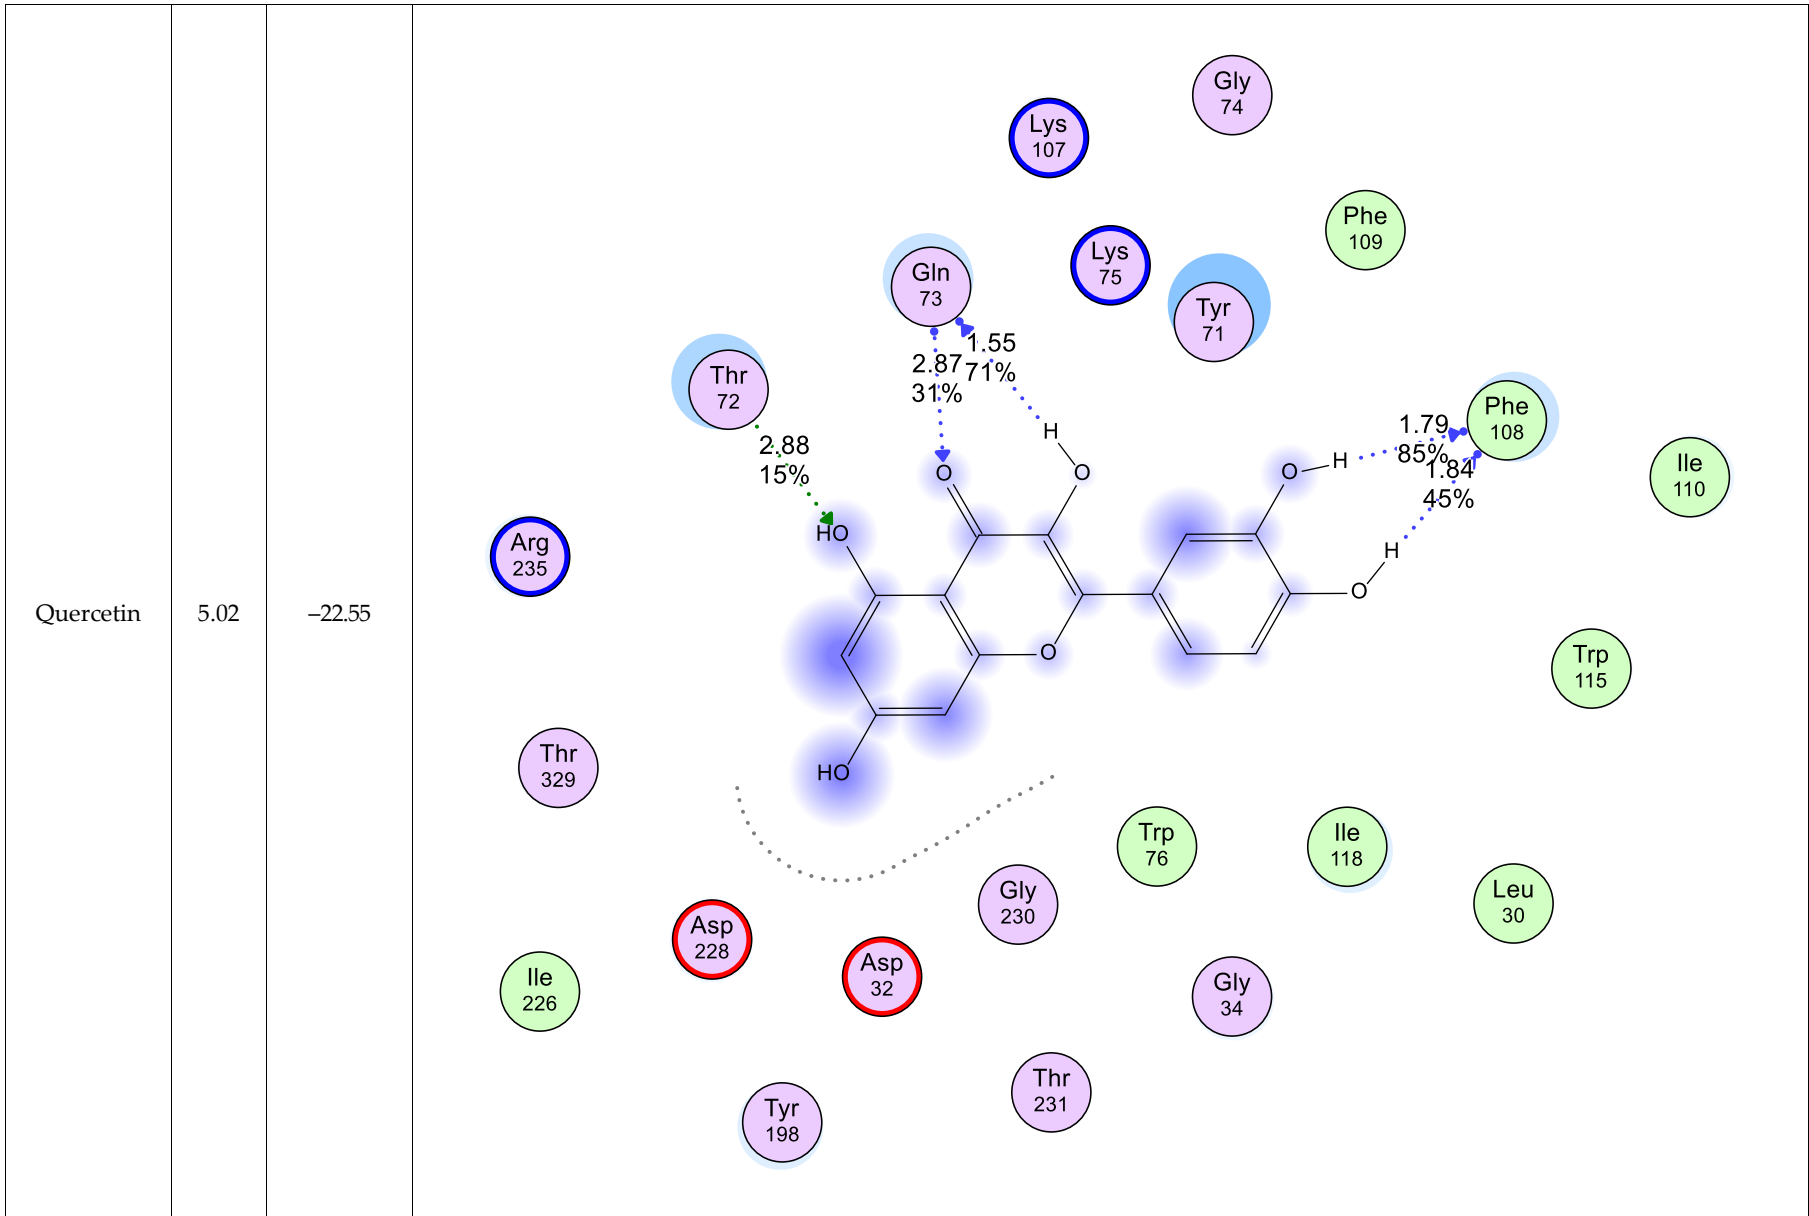

Umibecestat

7.96  
[4]

-47.04

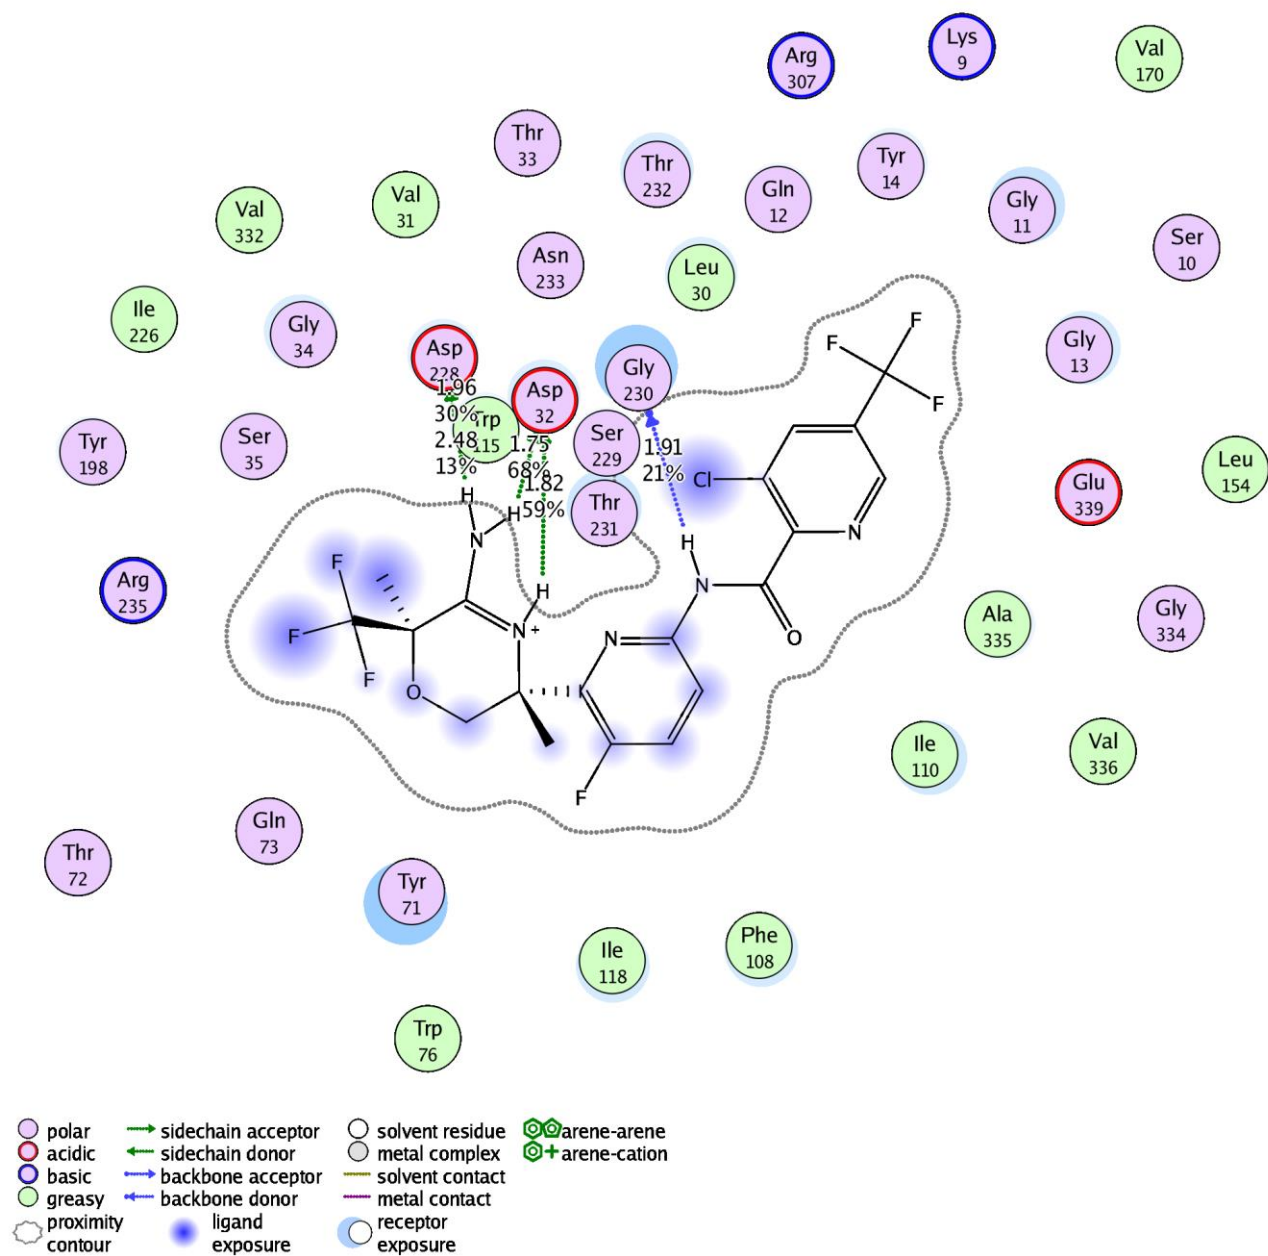

**Table S7.** Spectra of synthesized flavone derivatives

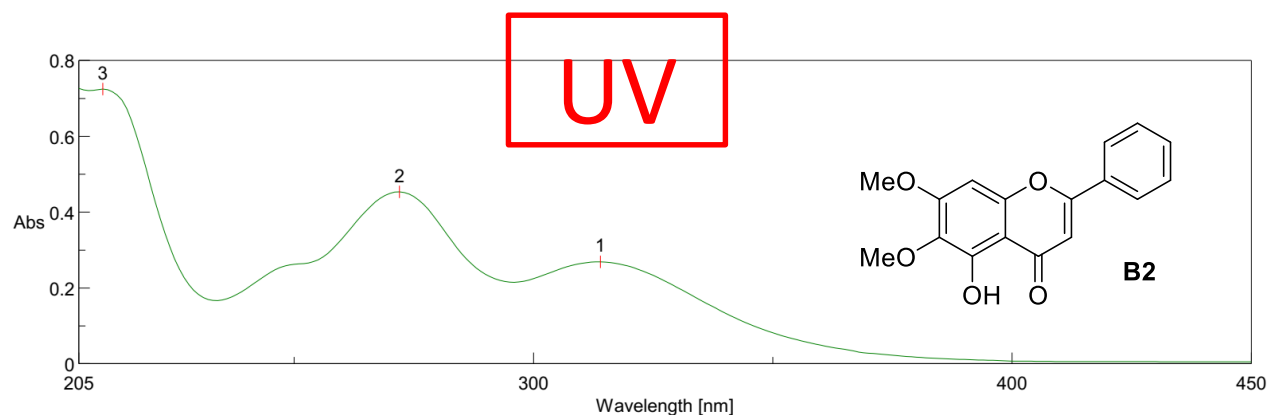

[ Result of Peak Picking ]

| No. | Position | Intensity | No. | Position | Intensity |
|-----|----------|-----------|-----|----------|-----------|
| 1   | 314      | 0.268399  | 2   | 272      | 0.452919  |
|     |          |           | 3   | 210      | 0.724239  |

SHIMADZU

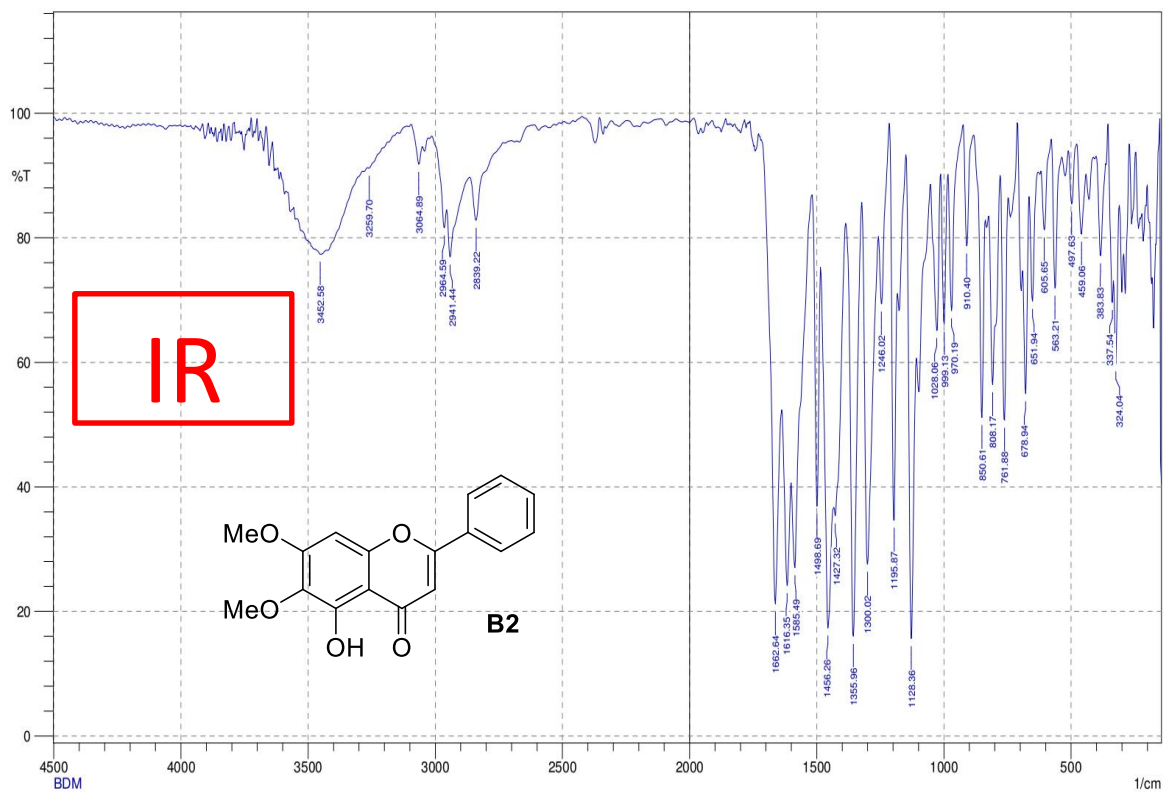

Sample name  
BDM

Apodization;  
Resolution;  
No. of Scans;

Date/Time; 5/11/2020 7:16:36 PM  
User; IR-Prestige





# MS

|               |         |             |                      |                 |              |                        |                       |
|---------------|---------|-------------|----------------------|-----------------|--------------|------------------------|-----------------------|
| Sample Name   | BDM 2   | Position    | P2-C1                | Instrument Name | Instrument 1 | User Name              |                       |
| Inj Vol       | 2       | InjPosition |                      | SampleType      | Sample       | IRM Calibration Status | Success               |
| Data Filename | BDM 2.d | ACQ Method  | Cot ngan - MSMS_Pos. | Comment         |              | Acquired Time          | 04/08/2020 8:02:09 PM |

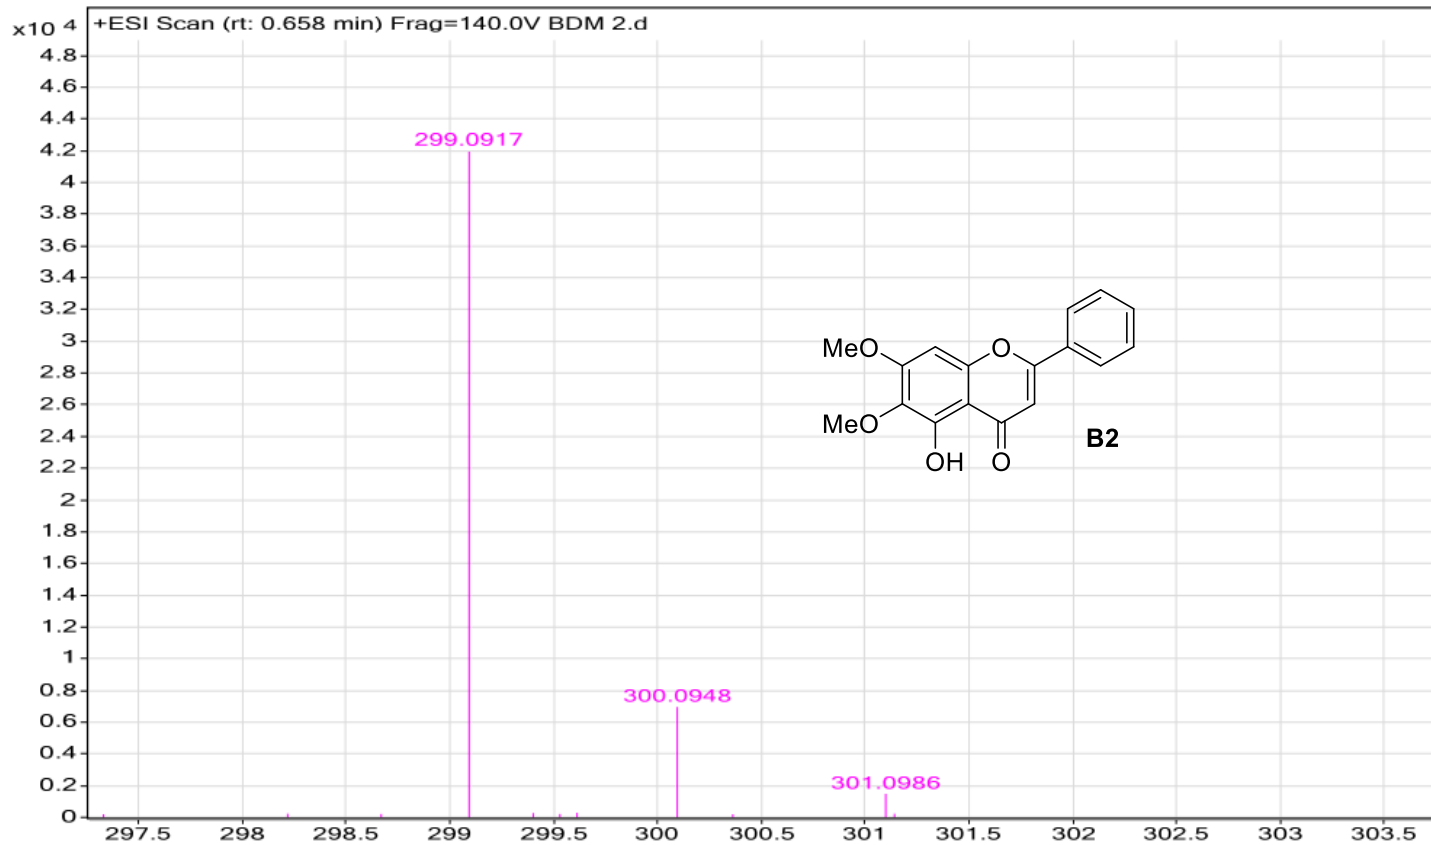

# <sup>1</sup>H-NMR

BDM-DMSO-1H

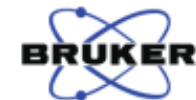

12.757

8.106  
8.092  
8.089  
7.625  
7.614  
7.611  
7.609  
7.598  
7.583  
7.570  
7.566  
7.022  
6.968  
3.937  
3.746  
3.298  
2.507  
2.503  
2.500  
2.496  
2.493

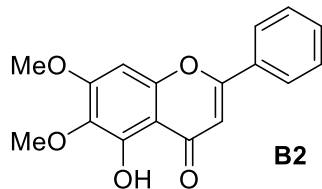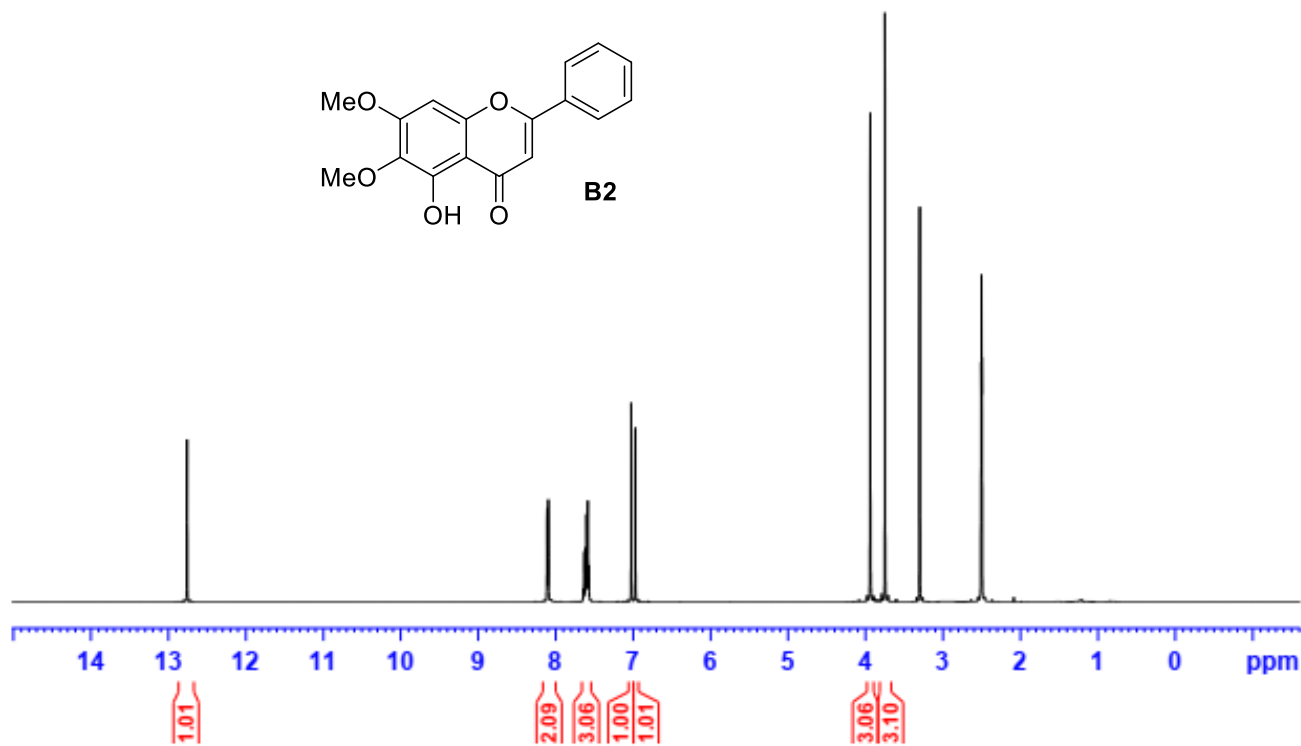

Current Data Parameters  
NAME 113HUAN\_BDM  
EXPNO 10  
PROCNO 1

F2 - Acquisition Parameters  
Date 20191008  
Time 12.10  
INSTRUM spect  
PROBHD 5 mm PABBO BB/  
PULPROG zg30  
TD 65536  
SOLVENT DMSO  
NS 16  
DS 2  
SWH 10000.000 Hz  
FIDRES 0.152588 Hz  
AQ 3.2767999 sec  
RG 127.68  
DW 50.000 usec  
DE 6.50 usec  
TE 304.6 K  
D1 1.00000000 sec  
TDD 1

----- CHANNEL f1 -----  
SFO1 500.1920889 MHz  
NUC1 1H  
P1 10.20 usec  
PLW1 22.00000000 W

F2 - Processing parameters  
SI 65536  
SF 500.1890050 MHz  
WDW EM  
SSB 0  
LB 0.30 Hz  
GB 0  
PC 1.00

# <sup>1</sup>H-NMR

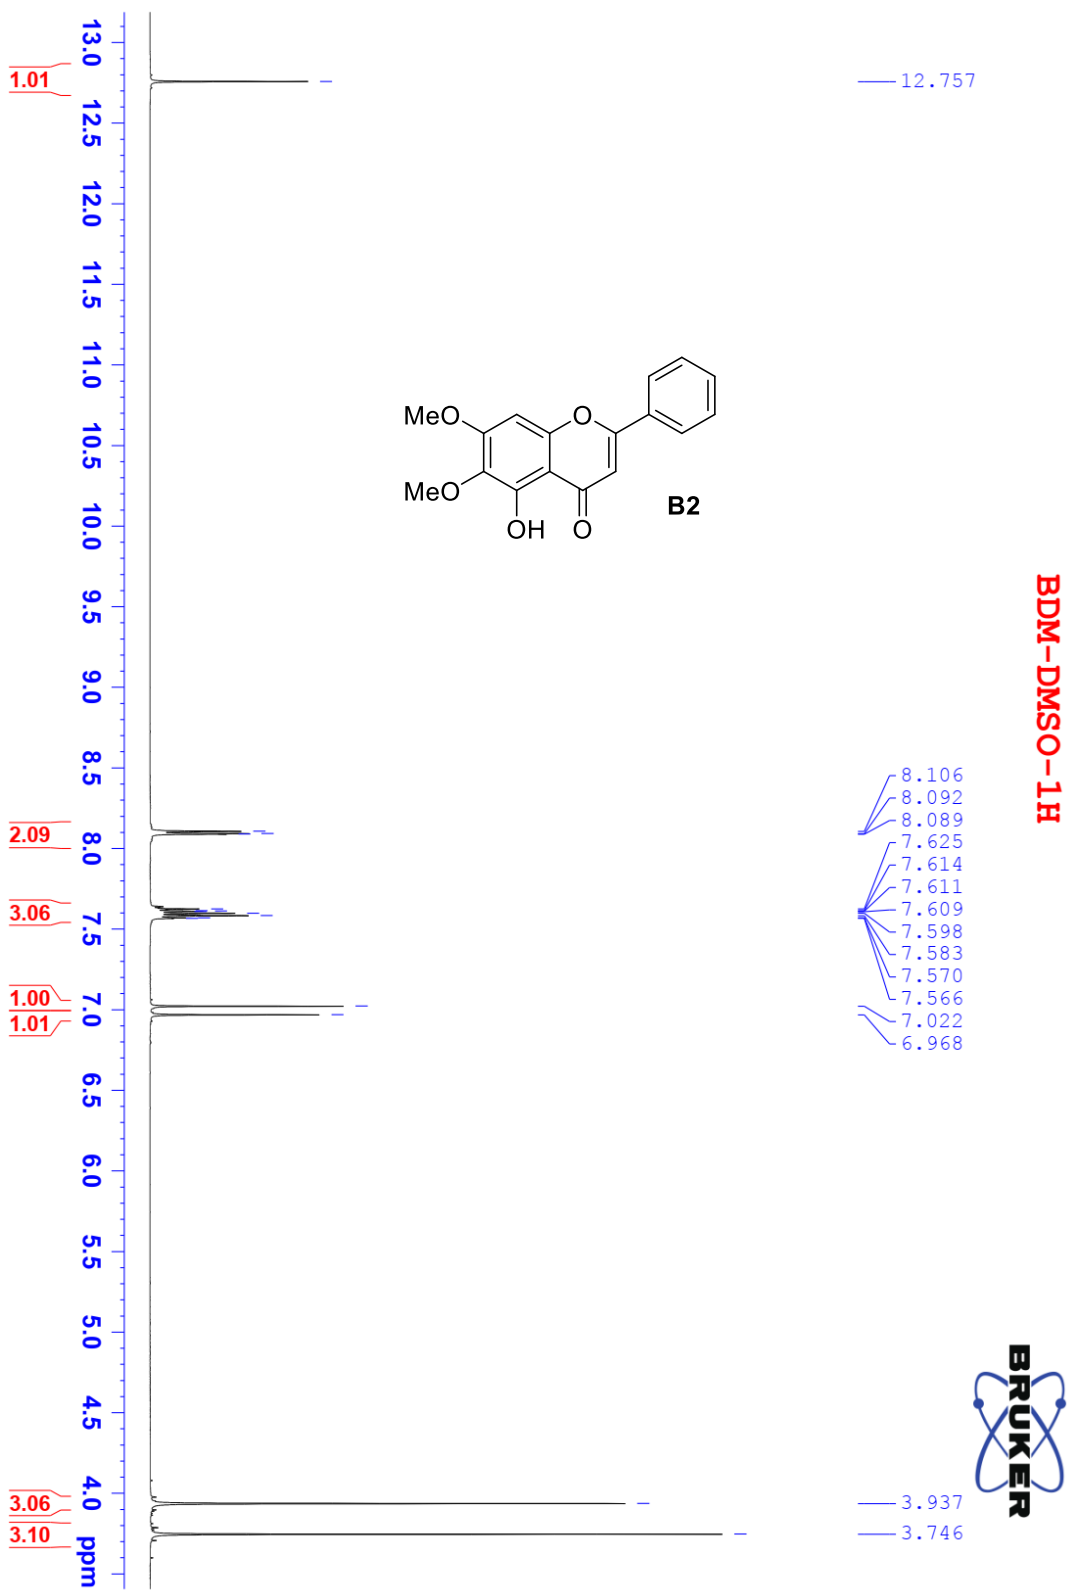

# <sup>1</sup>H-NMR

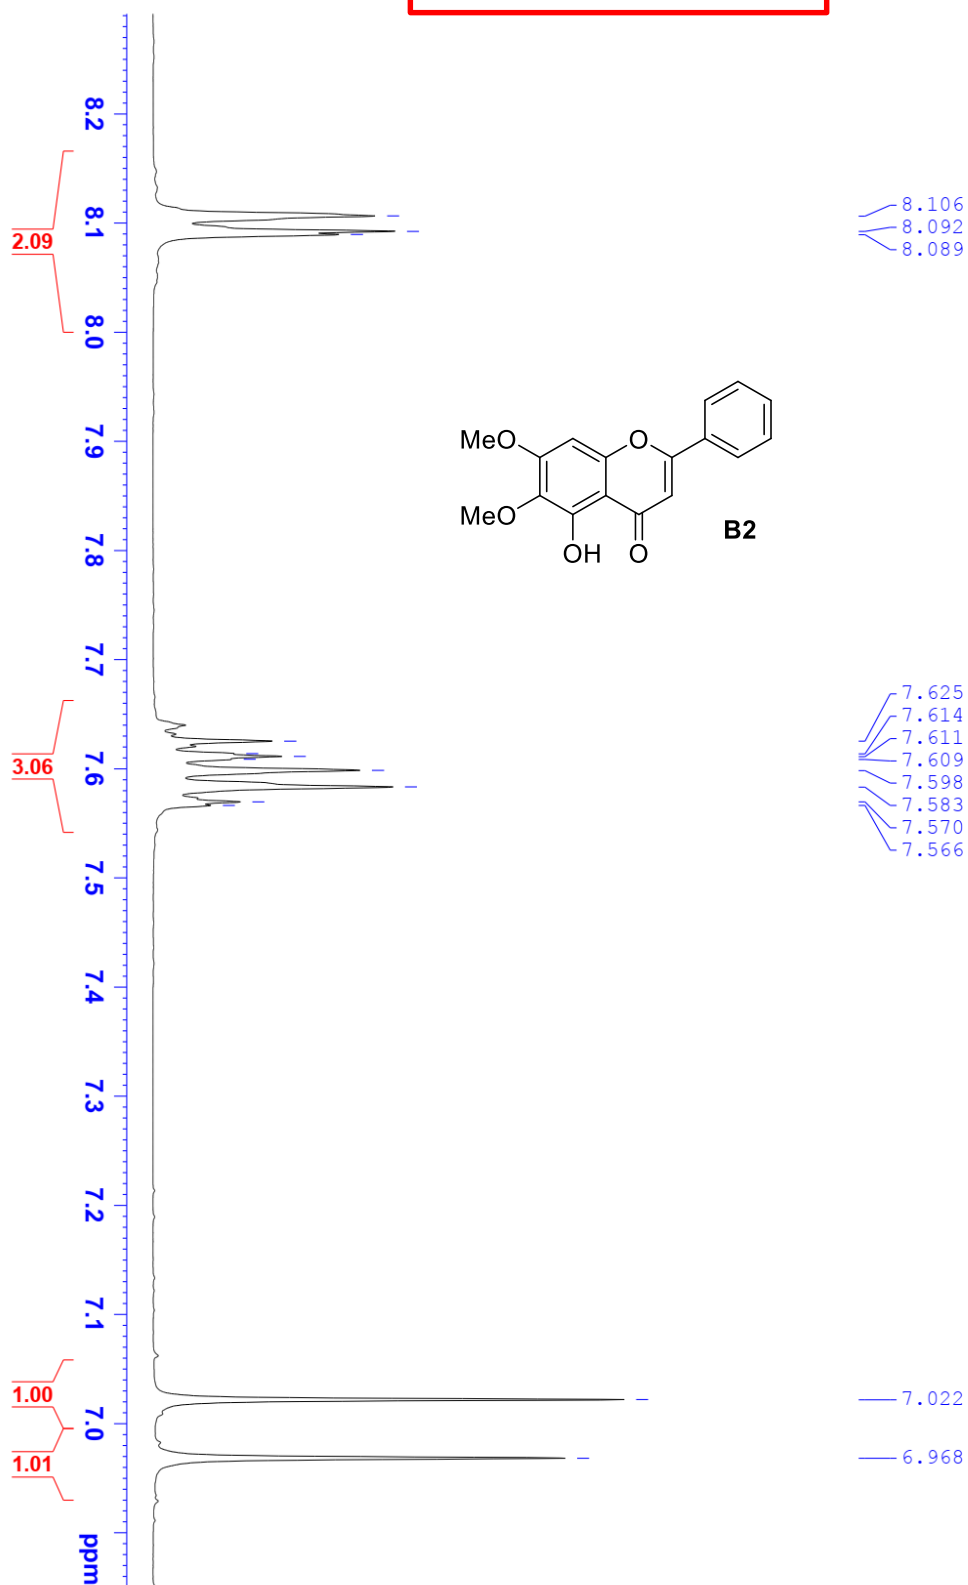

# <sup>13</sup>C-NMR

BDM-DMSO-C13CPD

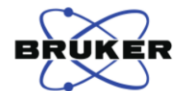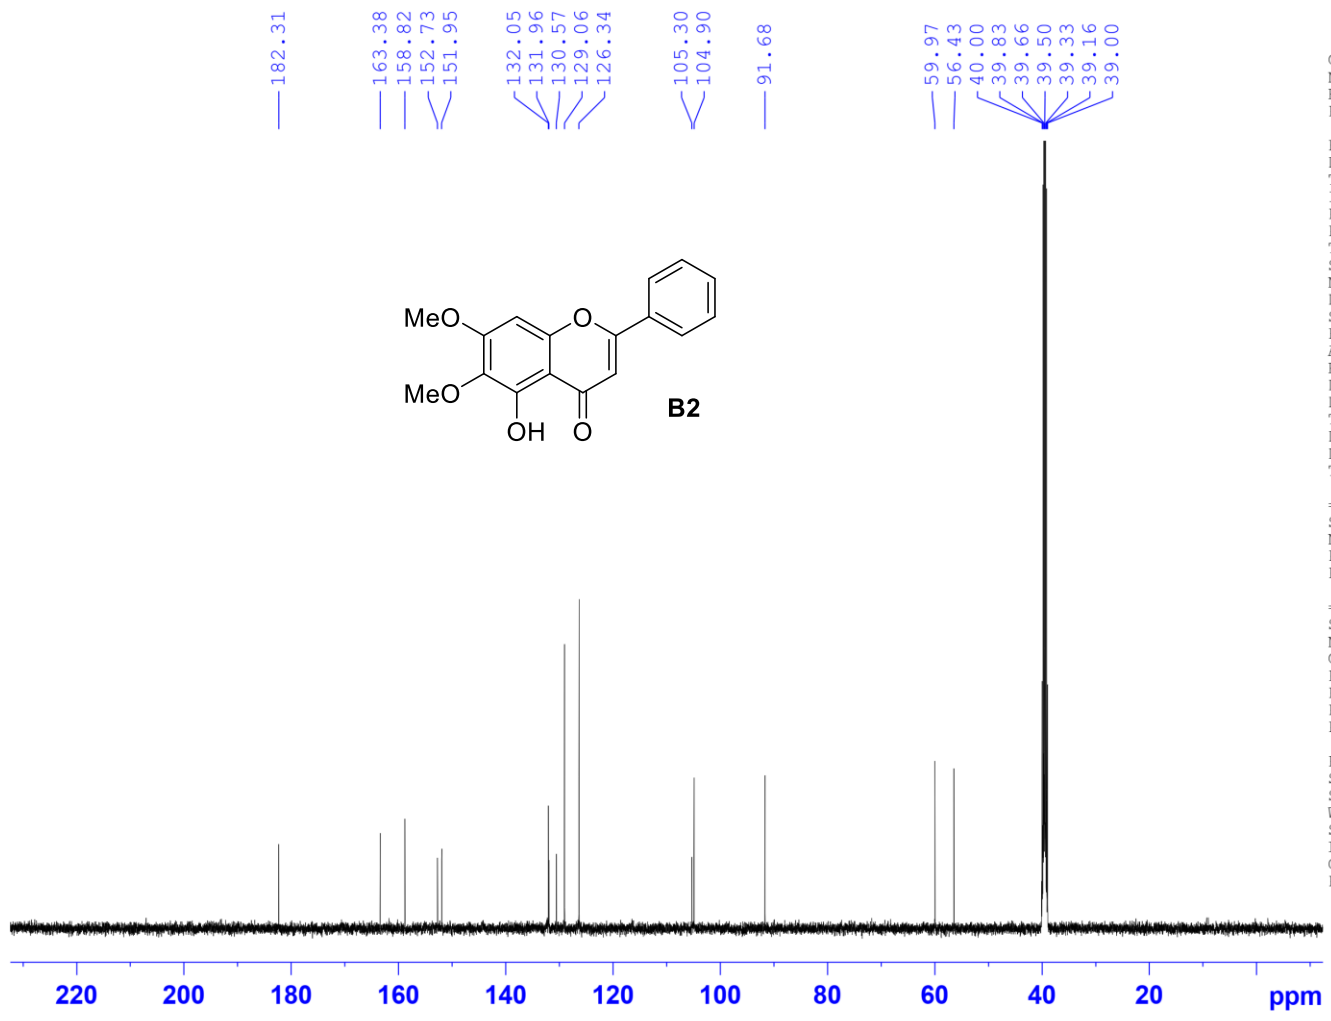

Current Data Parameters  
NAME 113HUAN\_BDM  
EXPNO 2  
PROCNO 1

F2 - Acquisition Parameters  
Date\_ 20191008  
Time 16.40  
INSTRUM spect  
PROBHD 5 mm PABBO BB/  
PULPROG zgpg30  
TD 65536  
SOLVENT DMSO  
NS 256  
DS 4  
SWH 31250.000 Hz  
FIDRES 0.476837 Hz  
AQ 1.0485760 sec  
RG 198.57  
DW 16.000 usec  
DE 6.50 usec  
TE 304.1 K  
D1 2.00000000 sec  
D11 0.03000000 sec  
TDO 1

==== CHANNEL f1 =====  
SFO1 125.7864591 MHz  
NUC1 13C  
P1 10.00 usec  
PLW1 88.00000000 W

==== CHANNEL f2 =====  
SFO2 500.1910008 MHz  
NUC2 1H  
CPDPRG[2] waltz16  
PCPD2 80.00 usec  
PLW2 22.00000000 W  
PLW12 0.35764000 W  
PLW13 0.17989001 W

F2 - Processing parameters  
SI 32768  
SF 125.7726928 MHz  
WDW EM  
SSB 0  
LB 1.00 Hz  
GB 0  
PC 1.40

# $^{13}\text{C-NMR}$

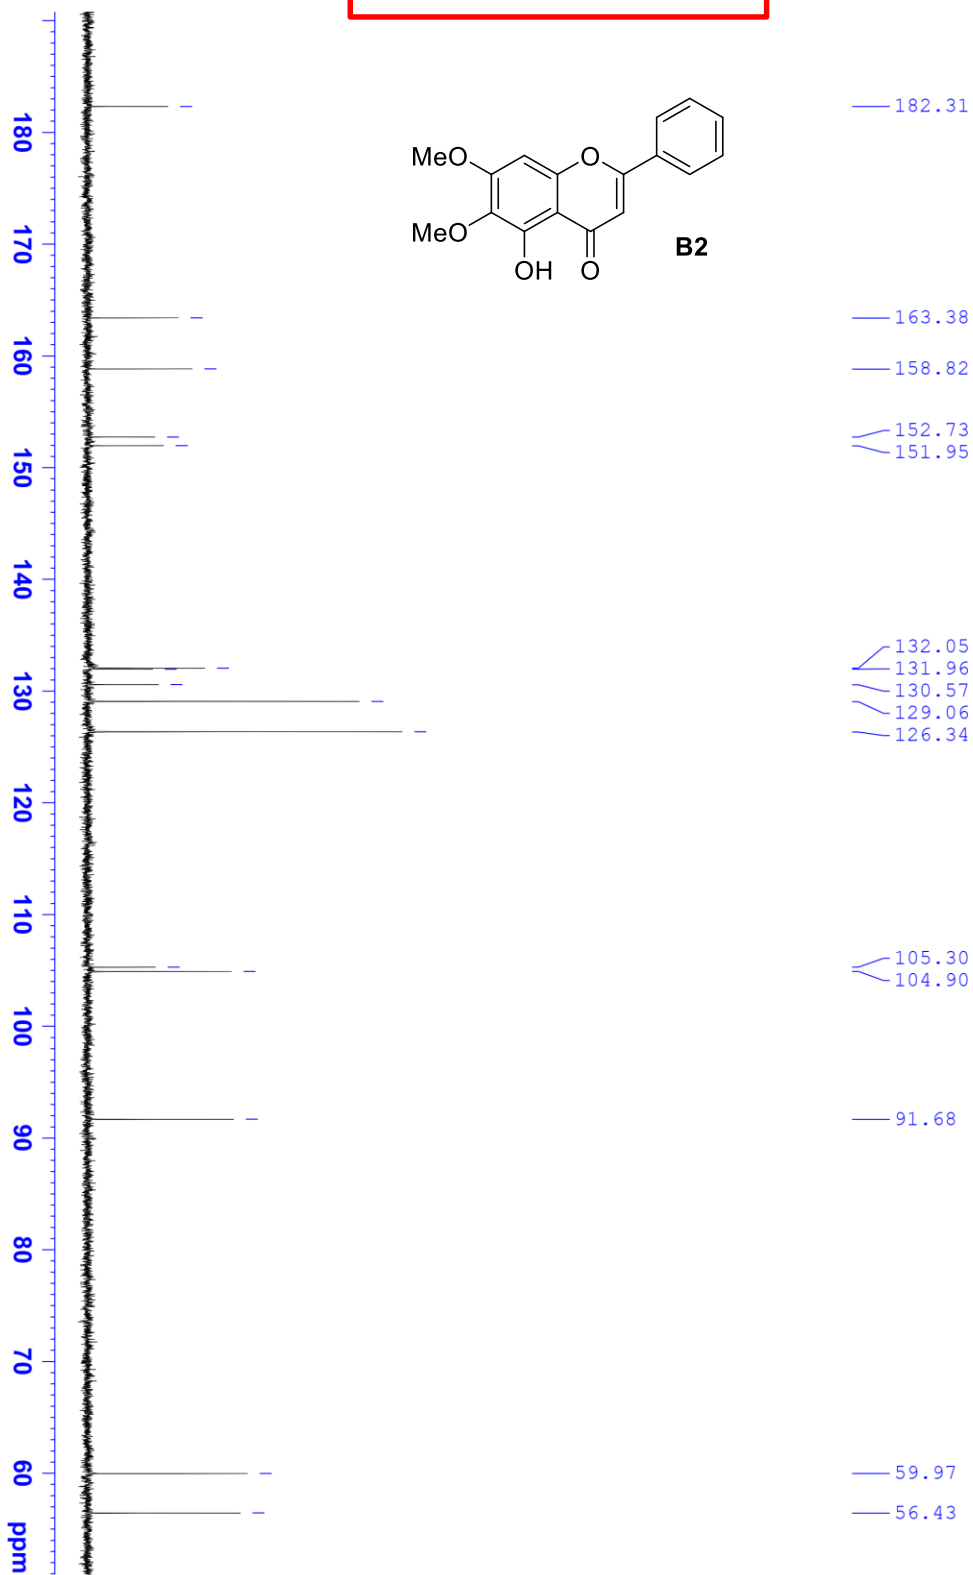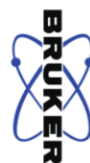

# $^{13}\text{C}$ -NMR

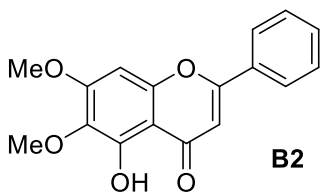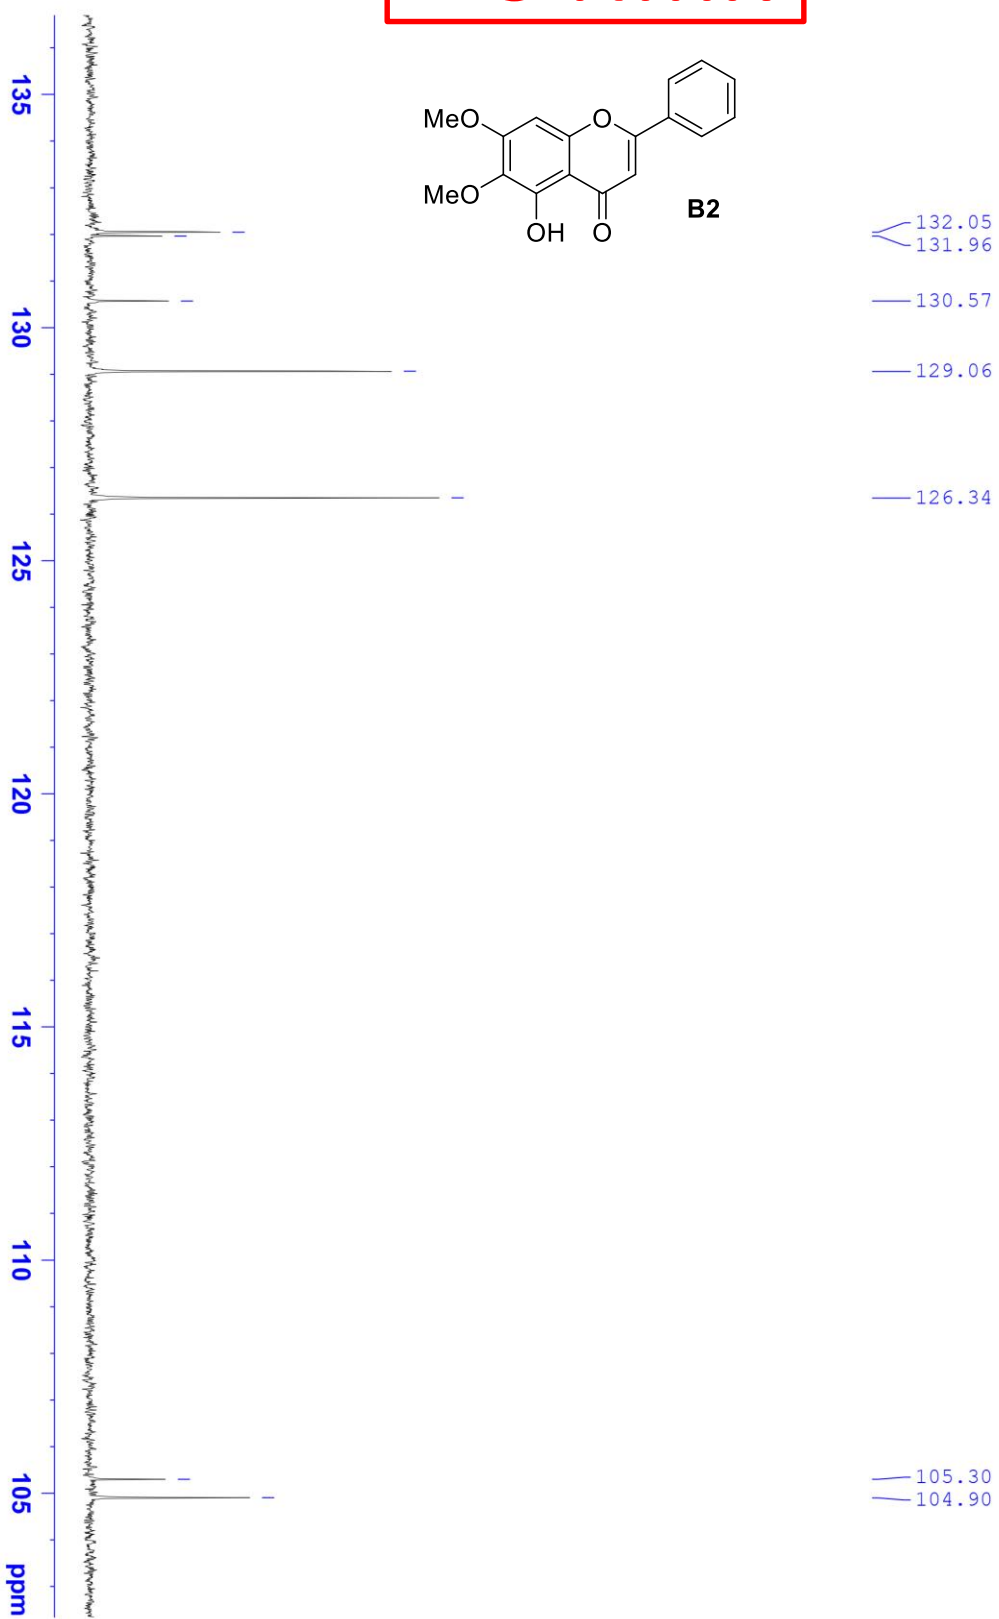

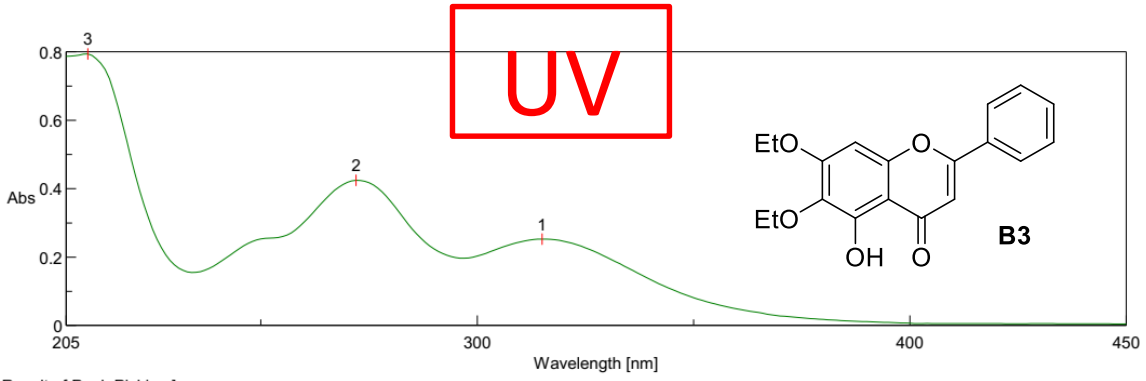

[ Result of Peak Picking ]

| No. | Position | Intensity | No. | Position | Intensity | No. | Position | Intensity |
|-----|----------|-----------|-----|----------|-----------|-----|----------|-----------|
| 1   | 315      | 0.252366  | 2   | 272      | 0.424071  | 3   | 210      | 0.793522  |

**SHIMADZU**

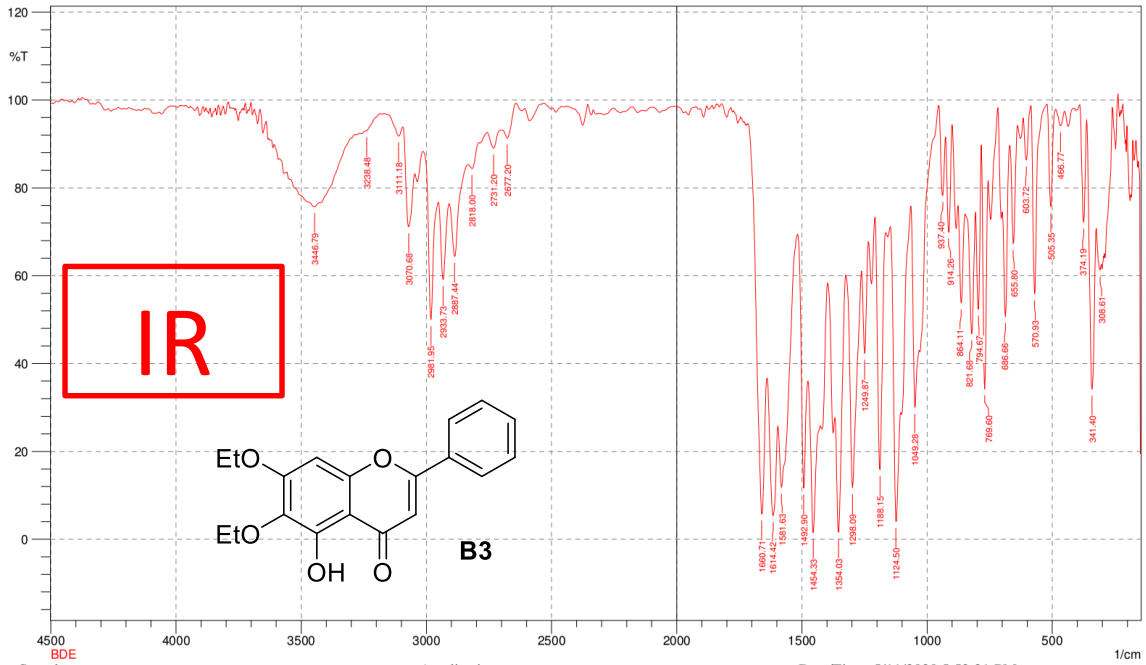

Sample name  
BDE

Apodization;  
Resolution;  
No. of Scans;

Date/Time; 5/11/2020 5:52:21 PM  
User; IR-Prestige



# MS

## Qualitative Analysis Report

**Data Filename** BDE 4.d      **Sample Name** BDE 4  
**Sample Type** Sample      **Position** P2-B2  
**Instrument Name** Instrument 1      **User Name**  
**Acq Method** Cot ngan - MSMS\_Pos.m      **Acquired Time** 04/08/2020 7:17:38 PM  
**IRM Calibration Status** Success      **DA Method** COTNGAN.M.m  
**Comment**  
**Sample Group**  
**Stream Name** LC 1      **Info.**  
**Acquisition SW** 6200 series TOF/6500 series  
**Version** Q-TOF B.06.01 (B6172 SP1)

### User Chromatograms

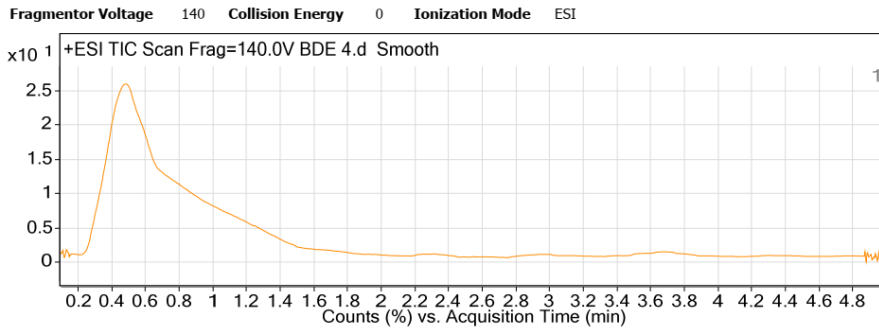

### User Spectra

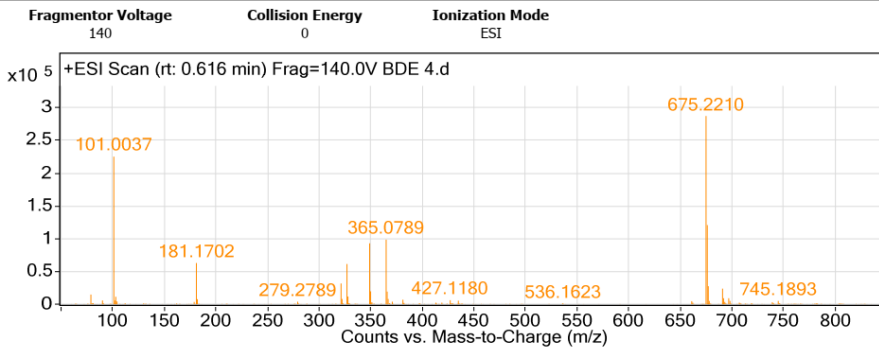

### Peak List

| m/z      | z | Abund     |
|----------|---|-----------|
| 101.0037 | 1 | 225364.16 |
| 181.1702 | 1 | 62704.9   |
| 321.3268 | 1 | 31494.73  |
| 327.123  | 1 | 61334.02  |
| 349.105  | 1 | 92764.2   |
| 365.0789 | 1 | 98738.83  |
| 675.221  | 1 | 287090.03 |
| 676.2238 | 1 | 120780.58 |
| 677.2262 | 1 | 27656.04  |
| 691.1934 | 1 | 23767.92  |

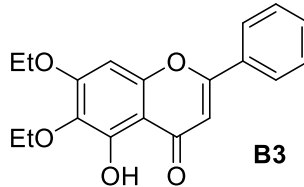

--- End Of Report ---

# MS

|               |         |             |                      |                 |              |                        |                       |
|---------------|---------|-------------|----------------------|-----------------|--------------|------------------------|-----------------------|
| Sample Name   | BDE 4   | Position    | P2-B2                | Instrument Name | Instrument 1 | User Name              |                       |
| Inj Vol       | 2       | InjPosition |                      | SampleType      | Sample       | IRM Calibration Status | Success               |
| Data Filename | BDE 4.d | ACQ Method  | Cot ngan - MSMS_Pos. | Comment         |              | Acquired Time          | 04/08/2020 7:17:38 PM |

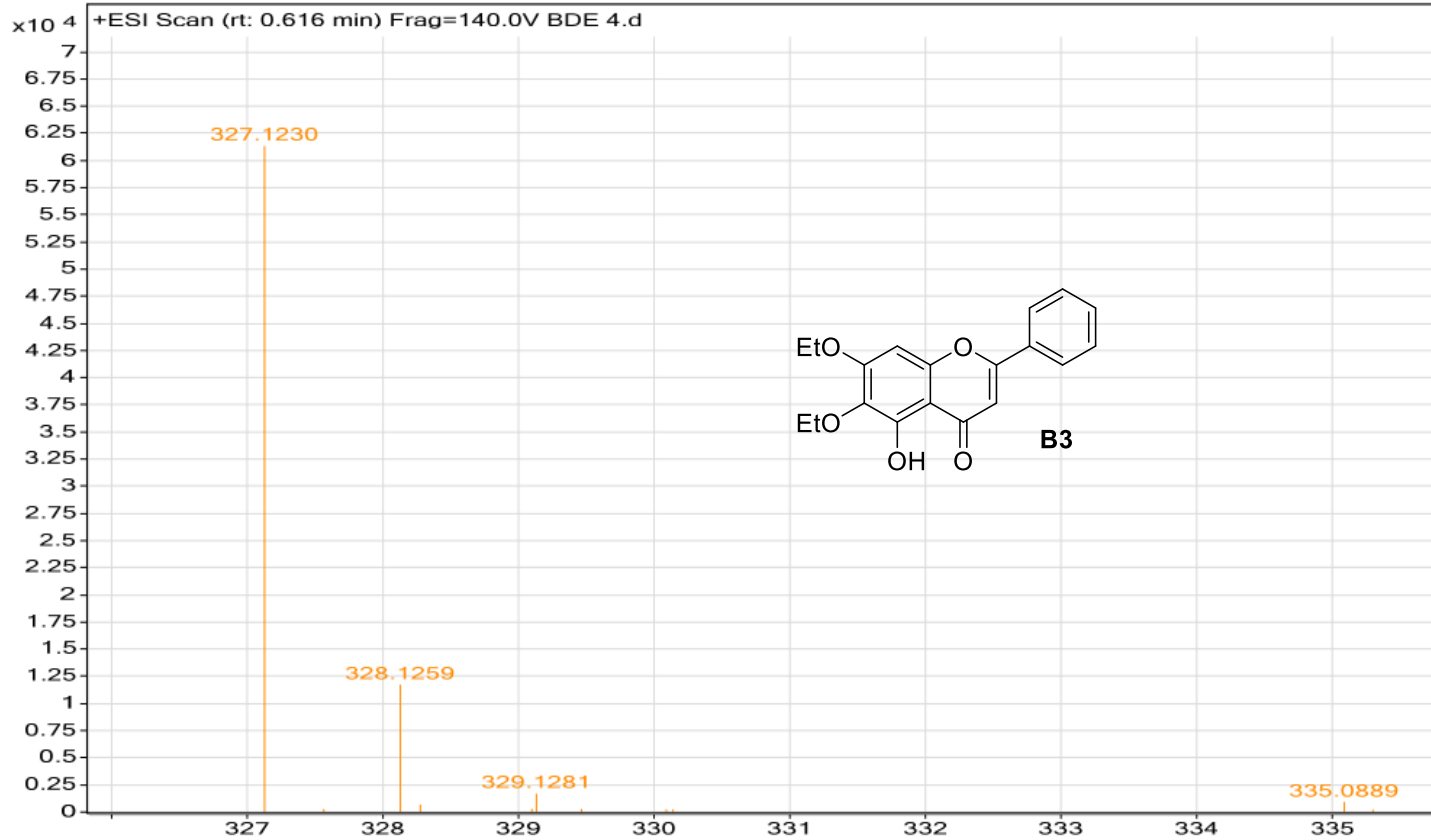

# <sup>1</sup>H-NMR

BDE-DMSO-1H

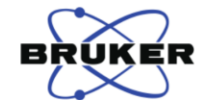

— 12.723

8.102  
8.100  
8.097  
8.090  
8.086  
8.083  
7.635  
7.620  
7.615  
7.609  
7.606  
7.603  
7.599  
7.594  
7.591  
7.583  
7.582  
7.579  
7.569  
7.566  
7.562  
7.004  
6.936  
4.213  
4.199  
4.185  
4.172  
4.014  
4.000  
3.986  
3.972  
3.300  
2.507  
2.503  
2.500  
2.496  
2.493  
1.413  
1.399  
1.385  
1.276  
1.262  
1.248

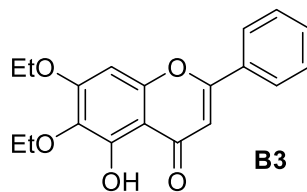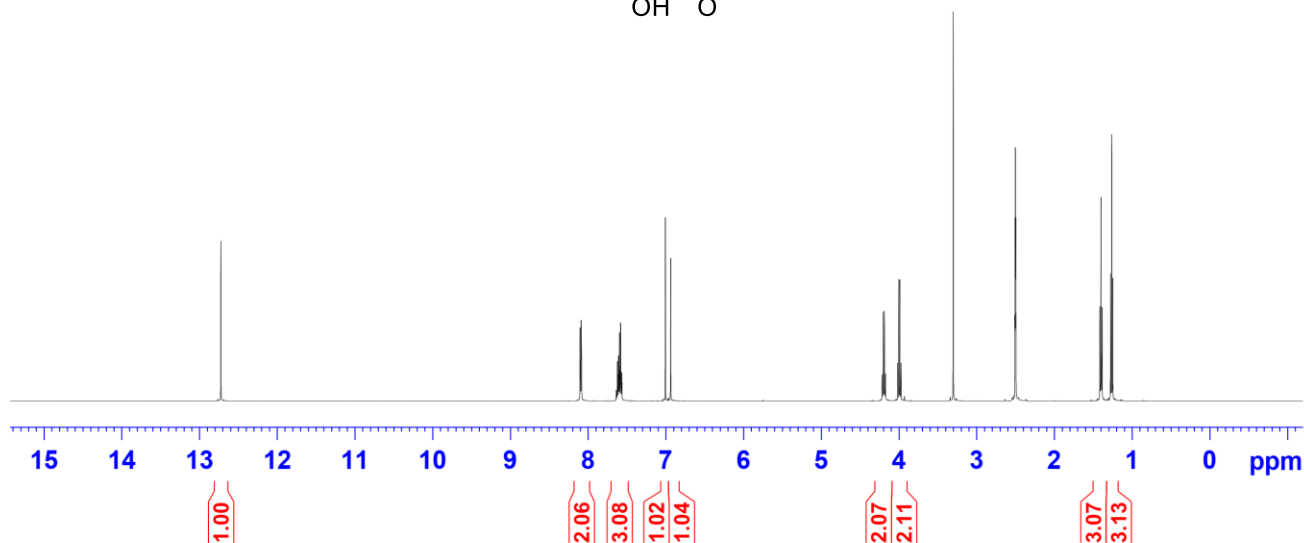

Current Data Parameters  
NAME 110HUAN\_BDE  
EXPNO 10  
PROCNO 1

F2 - Acquisition Parameters  
Date\_ 20191126  
Time\_ 11.33  
INSTRUM spect  
PROBHD 5 mm PABBO BB/  
PULPROG zg30  
TD 65536  
SOLVENT DMSO  
NS 16  
DS 2  
SWH 10000.000 Hz  
FIDRES 0.152588 Hz  
AQ 3.276799 sec  
RG 111.09  
DW 50.000 usec  
DE 6.50 usec  
TE 303.9 K  
D1 1.0000000 sec  
TD0 1

===== CHANNEL f1 =====  
SFO1 500.1920889 MHz  
NUC1 1H  
P1 10.20 usec  
PLW1 22.00000000 W

F2 - Processing parameters  
SI 65536  
SF 500.1890047 MHz  
WDW EM  
SSB 0  
LB 0.30 Hz  
GB 0  
PC 1.00

# <sup>1</sup>H-NMR

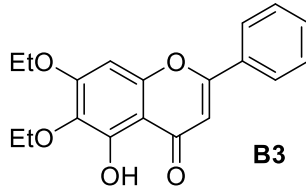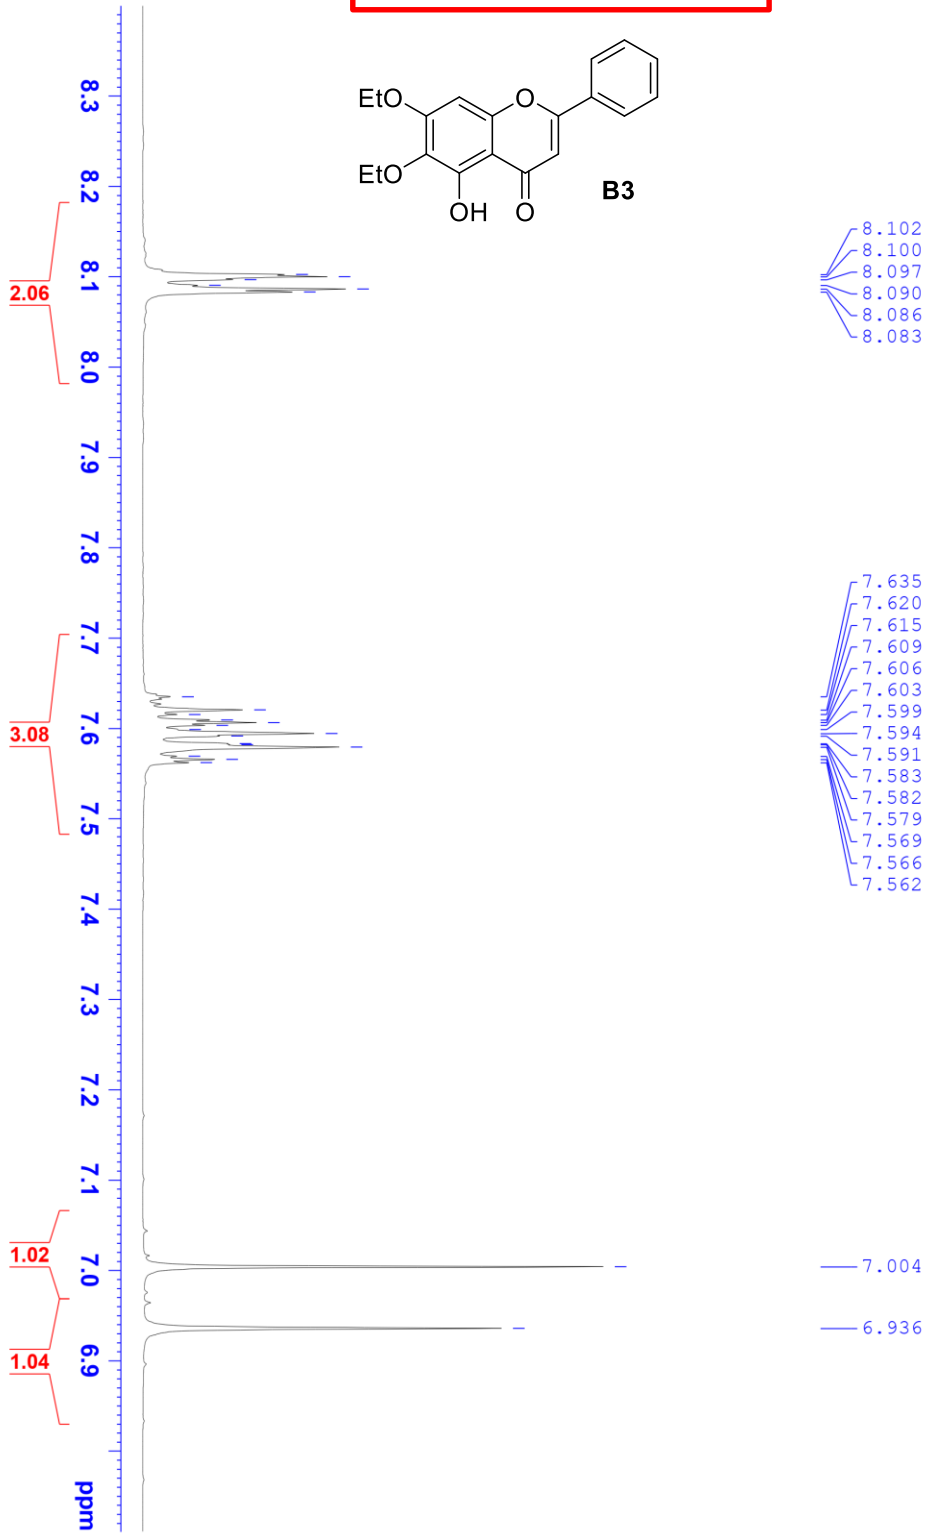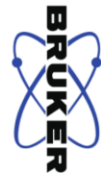

# <sup>1</sup>H-NMR

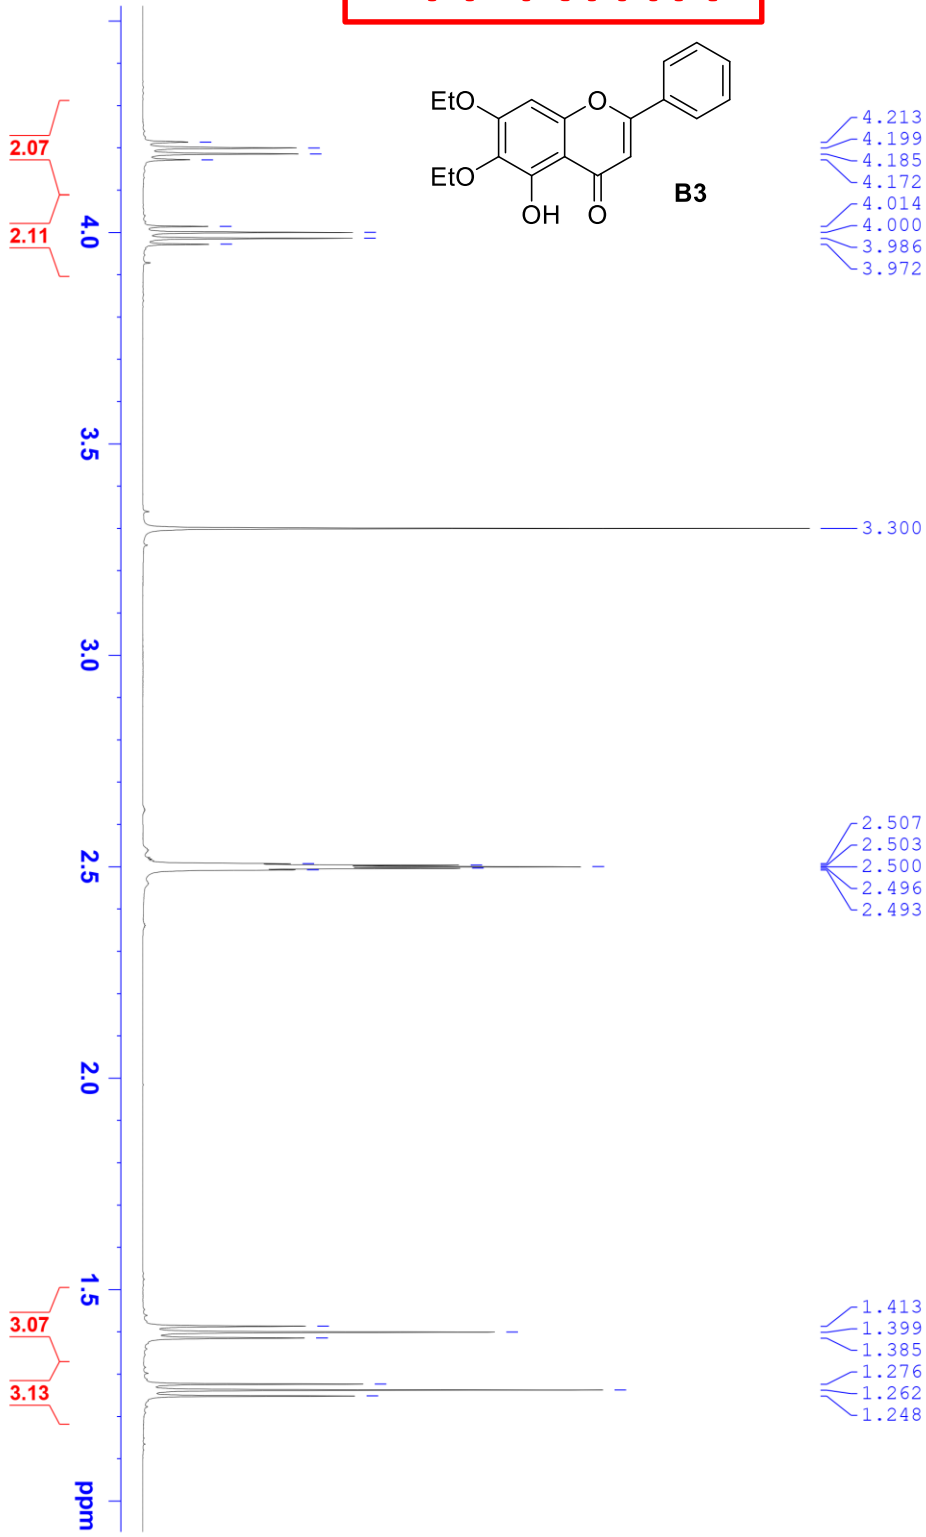

# <sup>13</sup>C-NMR

BDE-DMSO-C13CPD

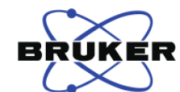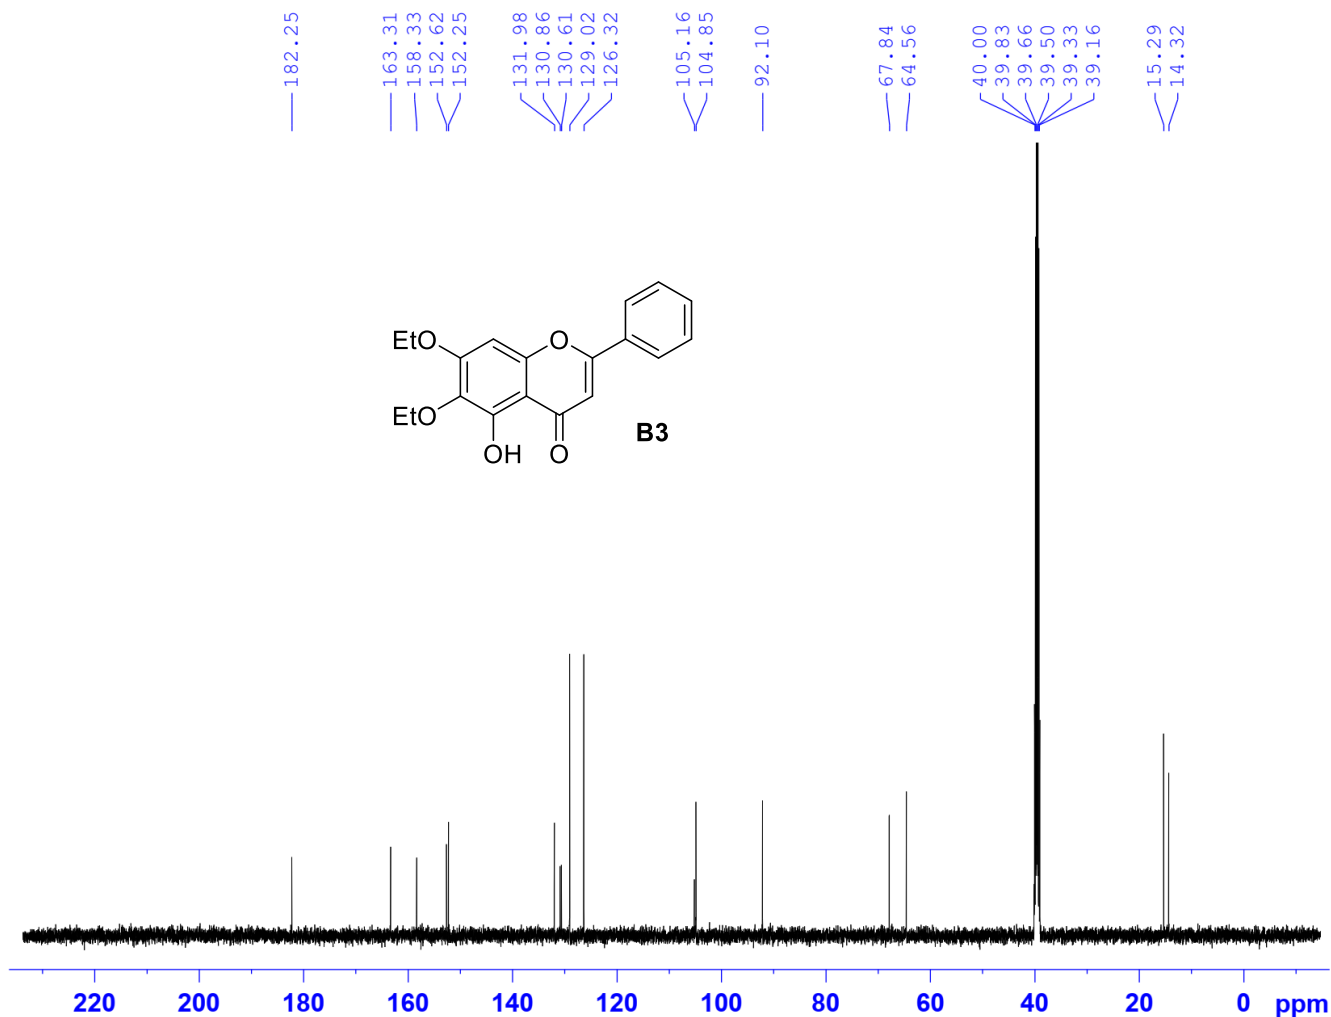

Current Data Parameters  
NAME 110HUAN\_BDE  
EXPNO 2  
PROCNO 1

F2 - Acquisition Parameters  
Date\_ 20191126  
Time\_ 17.24  
INSTRUM spect  
PROBHD 5 mm PABBO BB/  
PULPROG zgpg30  
TD 65536  
SOLVENT DMSO  
NS 256  
DS 4  
SWH 31250.000 Hz  
FIDRES 0.476837 Hz  
AQ 1.0485760 sec  
RG 198.57  
DW 16.000 usec  
DE 6.50 usec  
TE 306.5 K  
D1 2.00000000 sec  
D11 0.03000000 sec  
TD0 1

===== CHANNEL f1 =====  
SFO1 125.7864591 MHz  
NUC1 13C  
P1 10.00 usec  
PLW1 88.00000000 W

===== CHANNEL f2 =====  
SFO2 500.1910008 MHz  
NUC2 1H  
CPDPRG[2] waltz16  
PCPD2 80.00 usec  
PLW2 22.00000000 W  
PLW12 0.35764000 W  
PLW13 0.17989001 W

F2 - Processing parameters  
SI 32768  
SF 125.7726952 MHz  
WDW EM  
SSB 0  
LB 1.00 Hz  
GB 0  
PC 1.40

# $^{13}\text{C-NMR}$

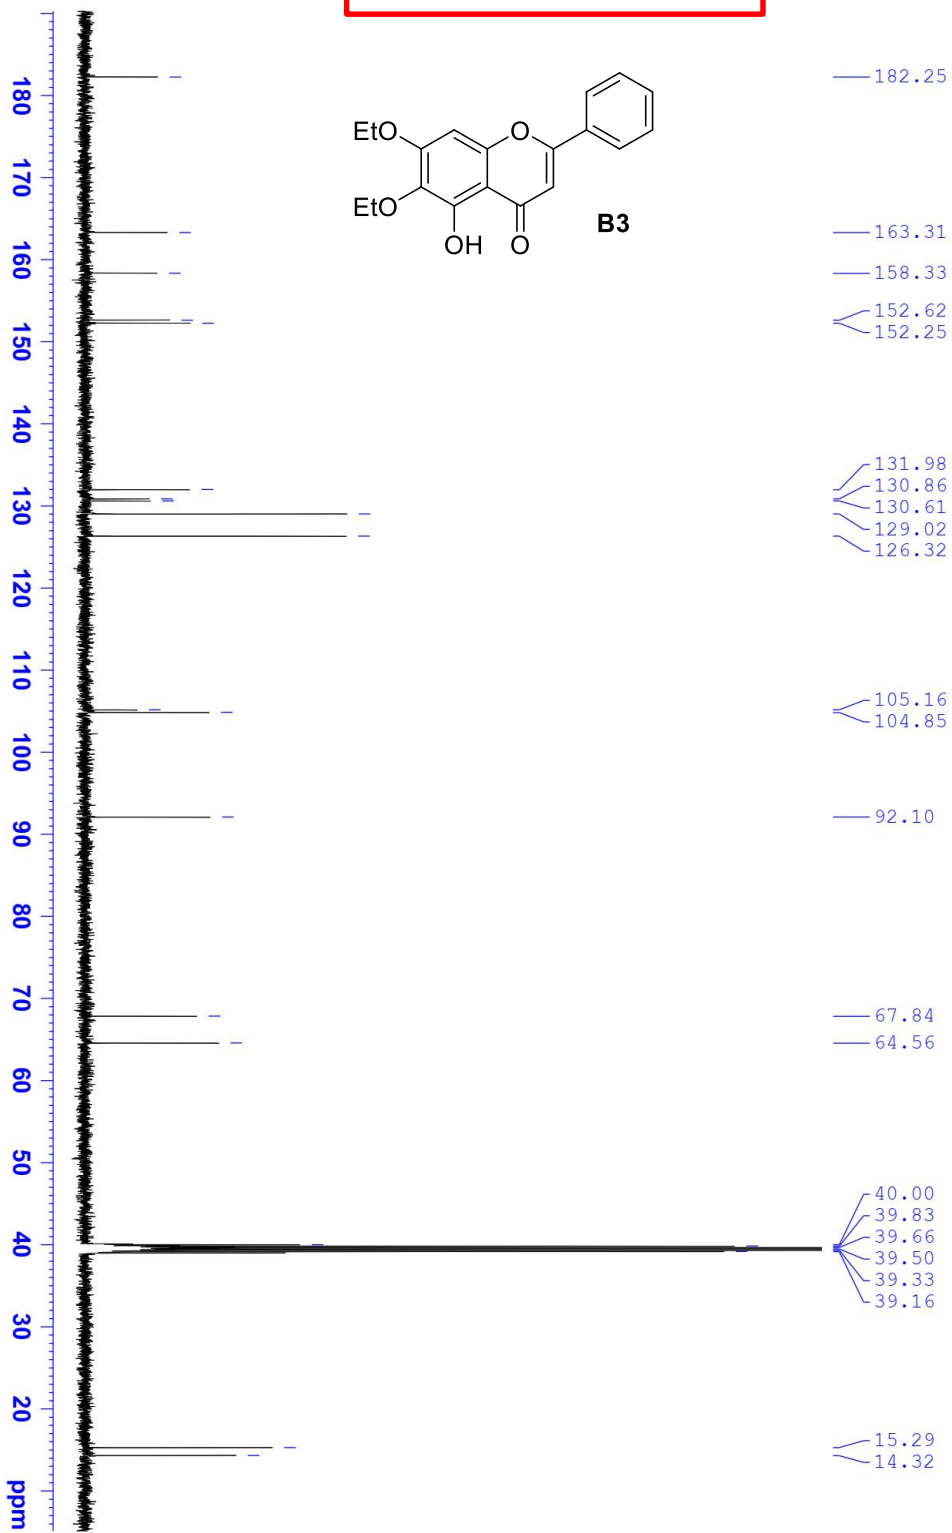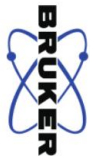

# $^{13}\text{C-NMR}$

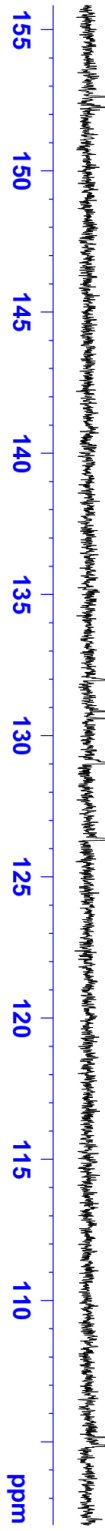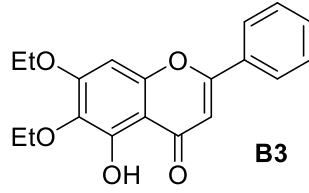

152.62  
152.25

131.98  
130.86  
130.61  
129.02

126.32

105.16  
104.85

**BDE-DMSO-C13CPD**

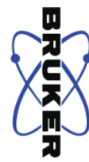



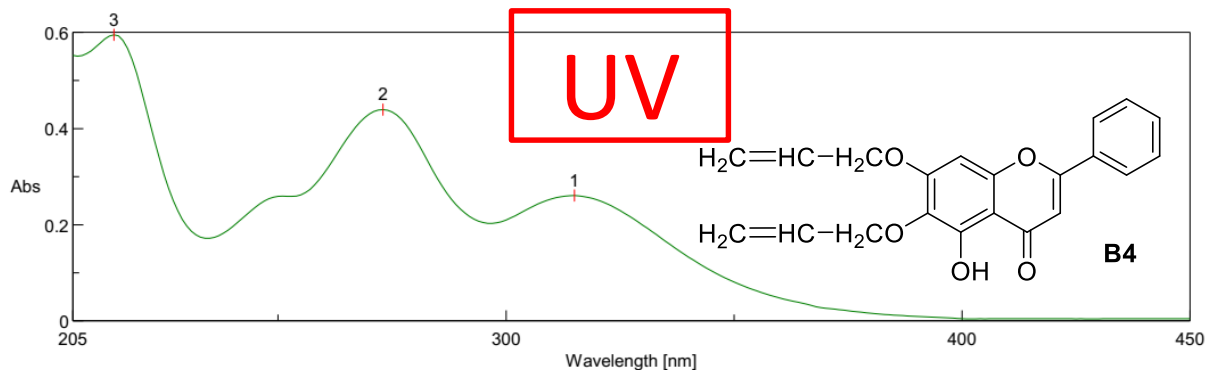

[ Result of Peak Picking ]

| No. | Position | Intensity | No. | Position | Intensity | No. | Position | Intensity |
|-----|----------|-----------|-----|----------|-----------|-----|----------|-----------|
| 1   | 315      | 0.260353  | 2   | 273      | 0.439249  | 3   | 214      | 0.594943  |

**SHIMADZU**

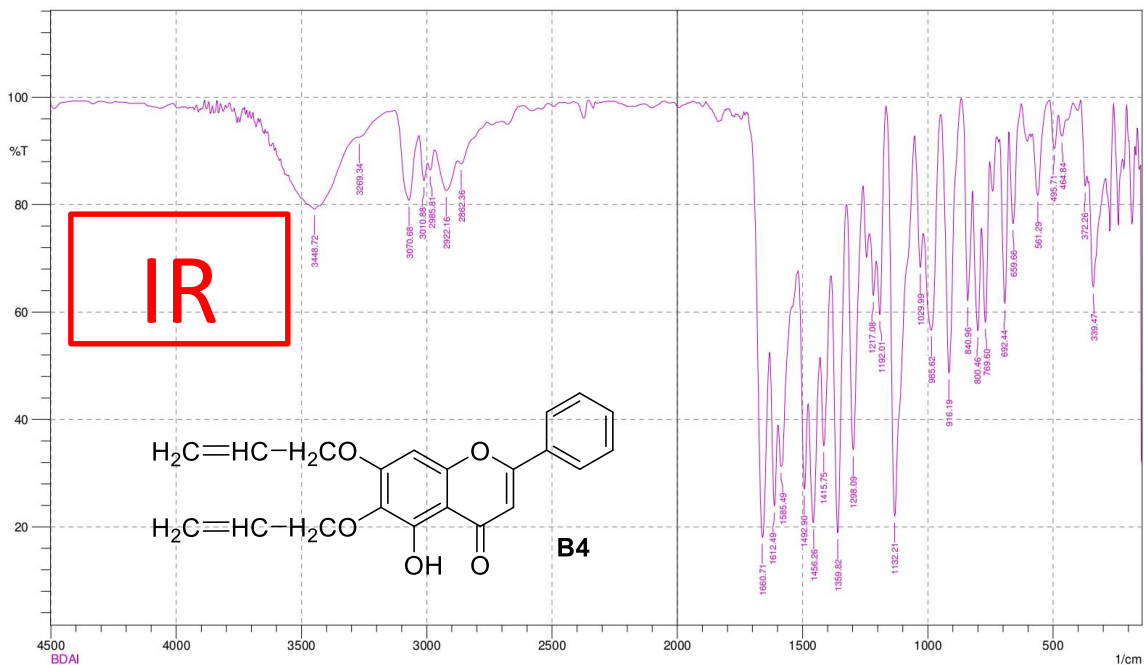

Sample name  
BDAI

Apodization;  
Resolution;  
No. of Scans;

Date/Time; 5/11/2020 7:32:35 PM  
User; IR-Prestige

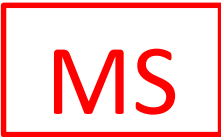

## Qualitative Analysis Report

**Data Filename** BDAI 6.d      **Sample Name** BDAI 6  
**Sample Type** Sample      **Position** P2-C5  
**Instrument Name** Instrument 1      **User Name**  
**Acq Method** Cot ngan - MSMS\_Pos.m      **Acquired Time** 04/08/2020 8:24:25 PM  
**IRM Calibration Status** **Success**      **DA Method** COTNGAN.M.m  
**Comment**  
**Sample Group**      **Info.**  
**Stream Name** LC 1      **Acquisition SW** 6200 series TOF/6500 series  
**Version** Q-TOF B.06.01 (B6172 SP1)

### User Chromatograms

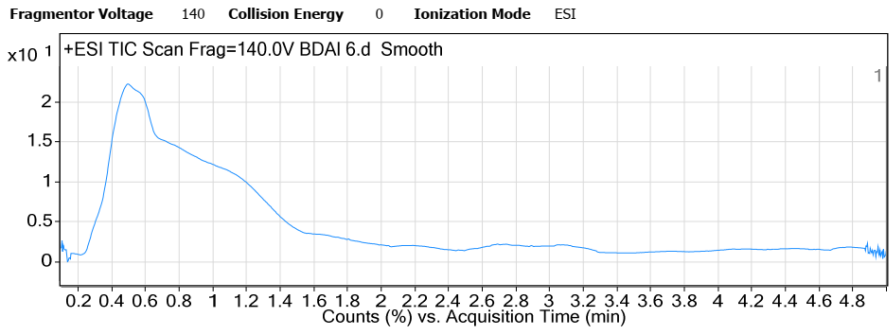

### User Spectra

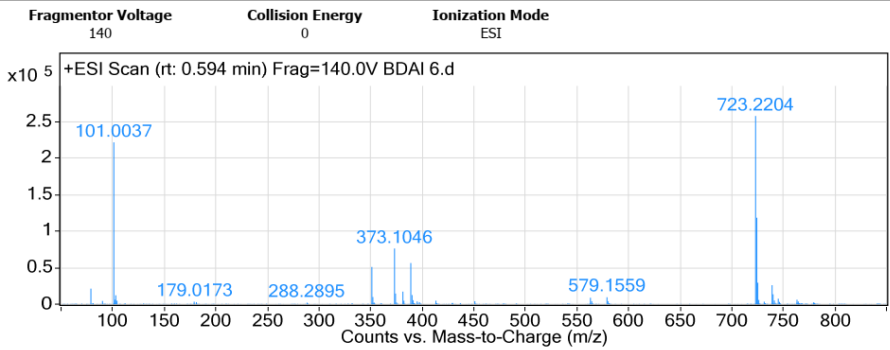

### Peak List

| m/z      | z | Abund     |
|----------|---|-----------|
| 79.0213  | 1 | 21162.16  |
| 101.0037 | 1 | 221657.94 |
| 351.1224 | 1 | 50865.48  |
| 373.1046 | 1 | 76269.85  |
| 381.2974 | 1 | 17324.84  |
| 389.0783 | 1 | 56522.68  |
| 723.2204 | 1 | 257544.19 |
| 724.223  | 1 | 118534.92 |
| 725.2257 | 1 | 29415.95  |
| 739.193  | 1 | 26186.25  |

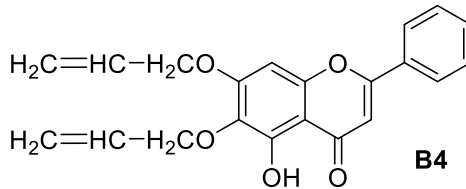

--- End Of Report ---

# MS

|               |          |             |                      |                 |              |                        |                       |
|---------------|----------|-------------|----------------------|-----------------|--------------|------------------------|-----------------------|
| Sample Name   | BDAI 6   | Position    | P2-C5                | Instrument Name | Instrument 1 | User Name              |                       |
| Inj Vol       | 2        | InjPosition |                      | SampleType      | Sample       | IRM Calibration Status | Success               |
| Data Filename | BDAI 6.d | ACQ Method  | Cot ngan - MSMS_Pos. | Comment         |              | Acquired Time          | 04/08/2020 8:24:25 PM |

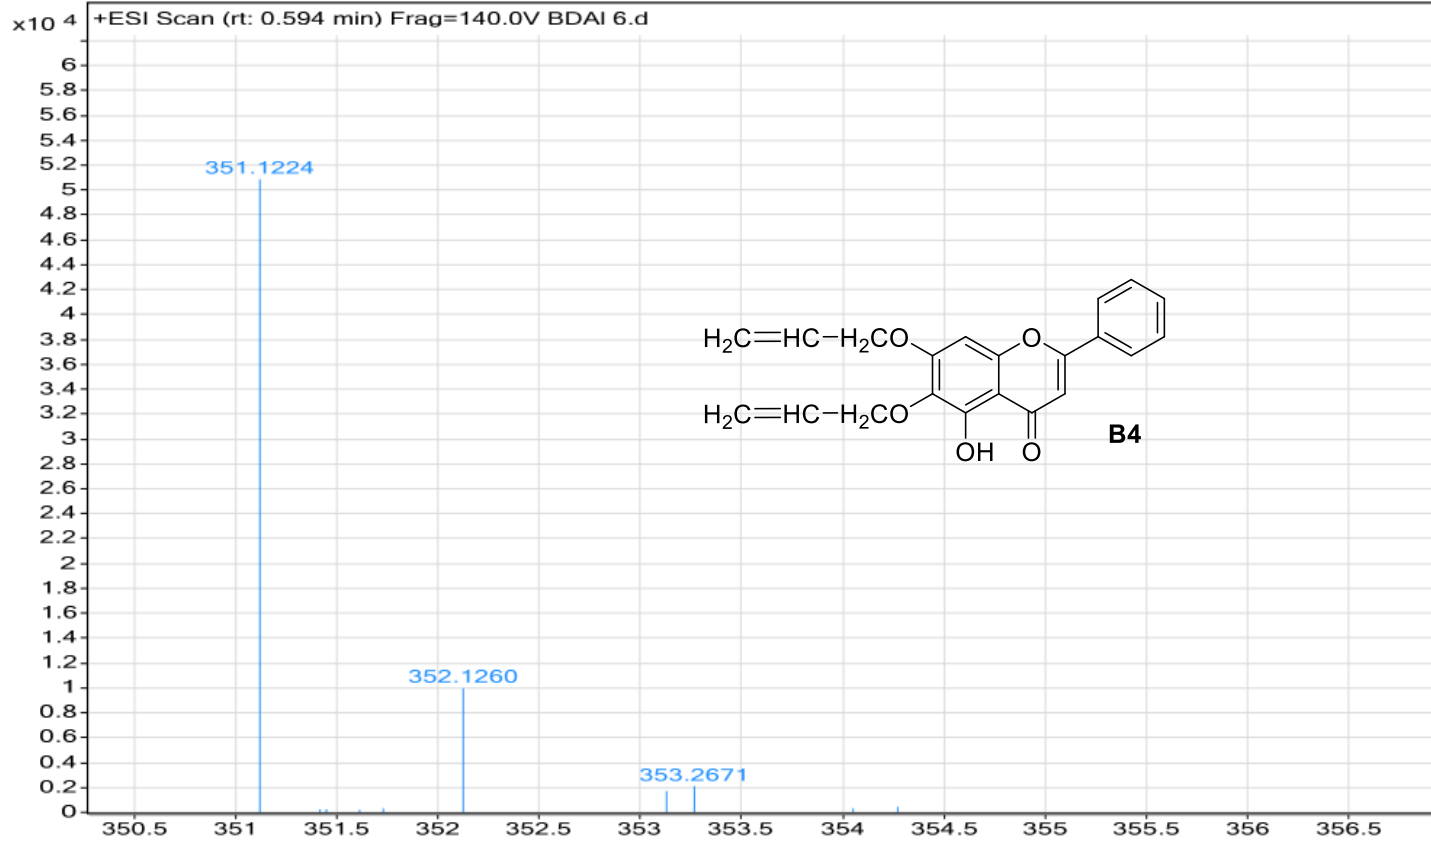

# <sup>1</sup>H-NMR

BDAL-DMSO-1H

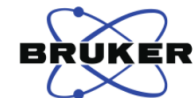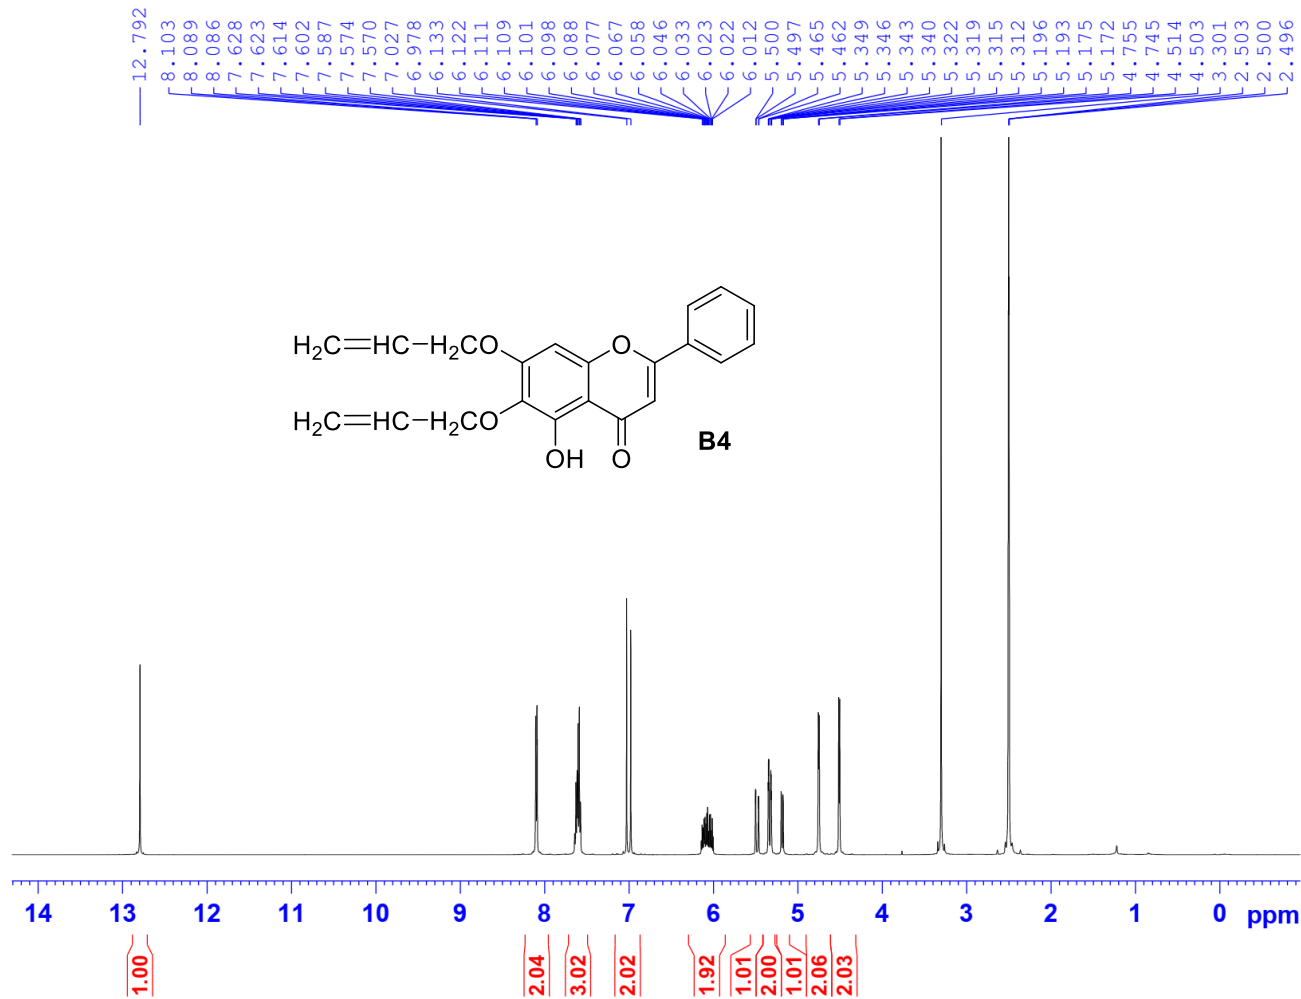

Current Data Parameters  
NAME 110HUAN\_BDAL  
EXPNO 10  
PROCNO 1

F2 - Acquisition Parameters  
Date\_ 20191126  
Time 11.29  
INSTRUM spect  
PROBHD 5 mm PABBO BB/  
PULPROG zg30  
TD 65536  
SOLVENT DMSO  
NS 16  
DS 2  
SWH 10000.000 Hz  
FIDRES 0.152588 Hz  
AQ 3.2767999 sec  
RG 127.68  
DW 50.000 usec  
DE 6.50 usec  
TE 303.9 K  
D1 1.00000000 sec  
TD0 1

==== CHANNEL f1 =====  
SFO1 500.1920889 MHz  
NUC1 1H  
P1 10.20 usec  
PLW1 22.00000000 W

F2 - Processing parameters  
SI 65536  
SF 500.1890052 MHz  
WDW EM  
SSB 0  
LB 0.30 Hz  
GB 0  
PC 1.00

# <sup>1</sup>H-NMR

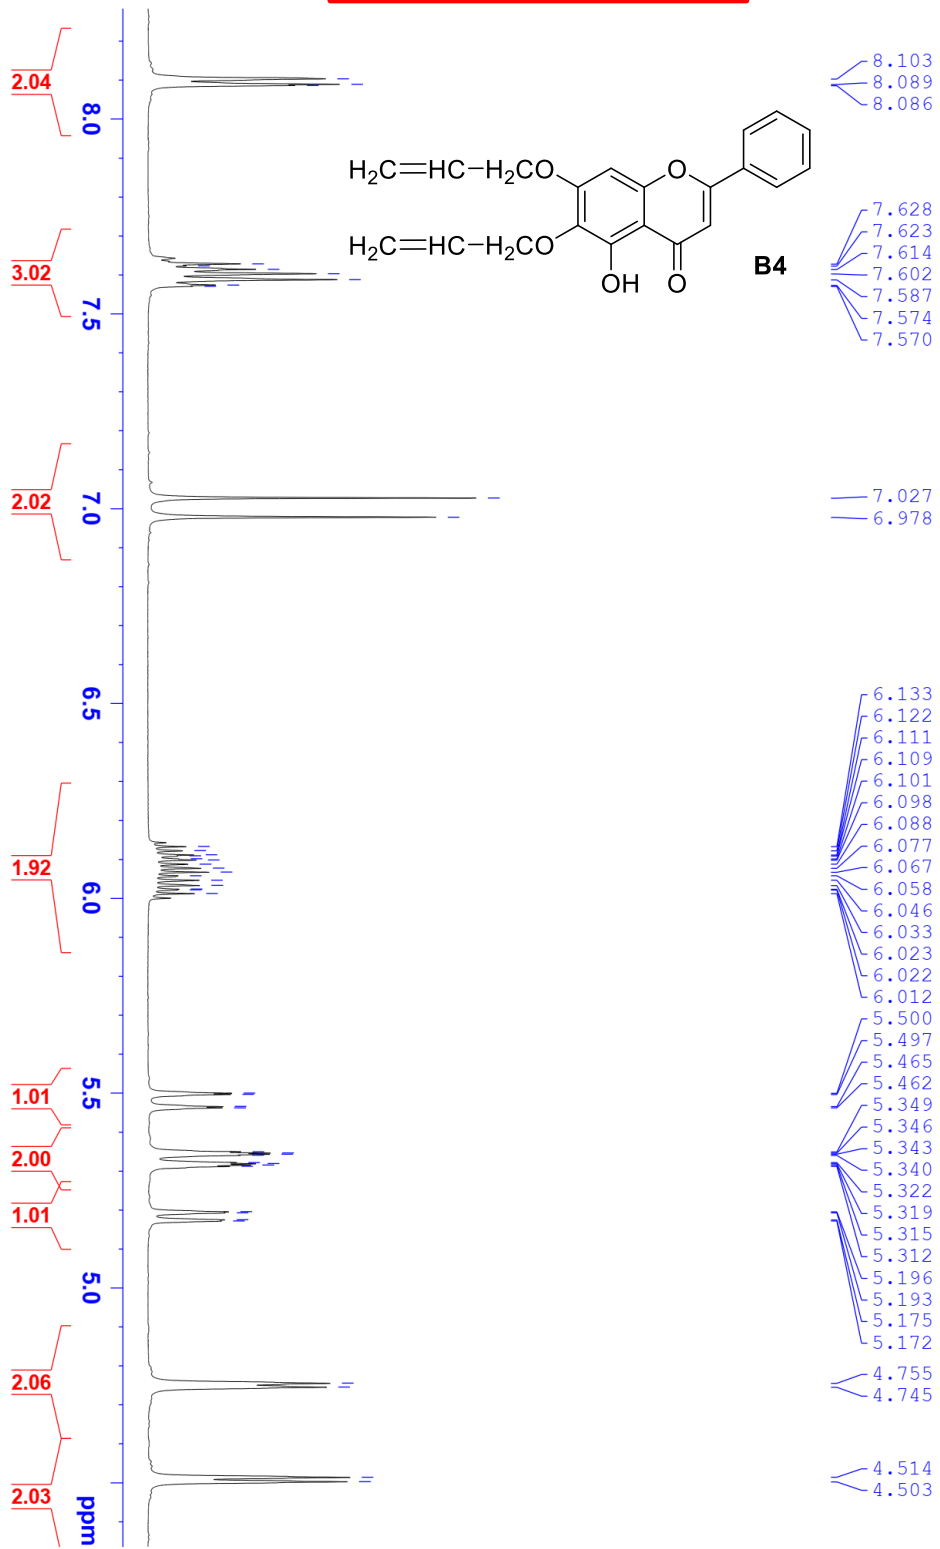

BDAL-DMSO-1H

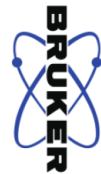

# 13C-NMR

BDAL-DMSO-C13CPD

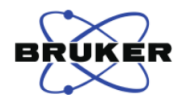

182.28  
163.43  
157.76  
152.61  
152.29  
134.39  
132.67  
132.03  
130.60  
130.58  
129.05  
126.34  
117.75  
117.51  
105.29  
104.91  
92.53  
72.96  
69.22  
40.00  
39.83  
39.66  
39.50  
39.33  
39.16  
39.00

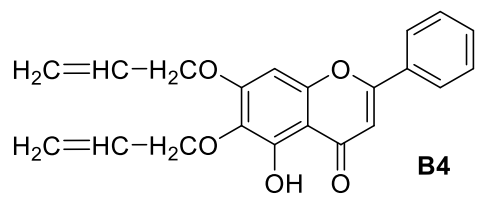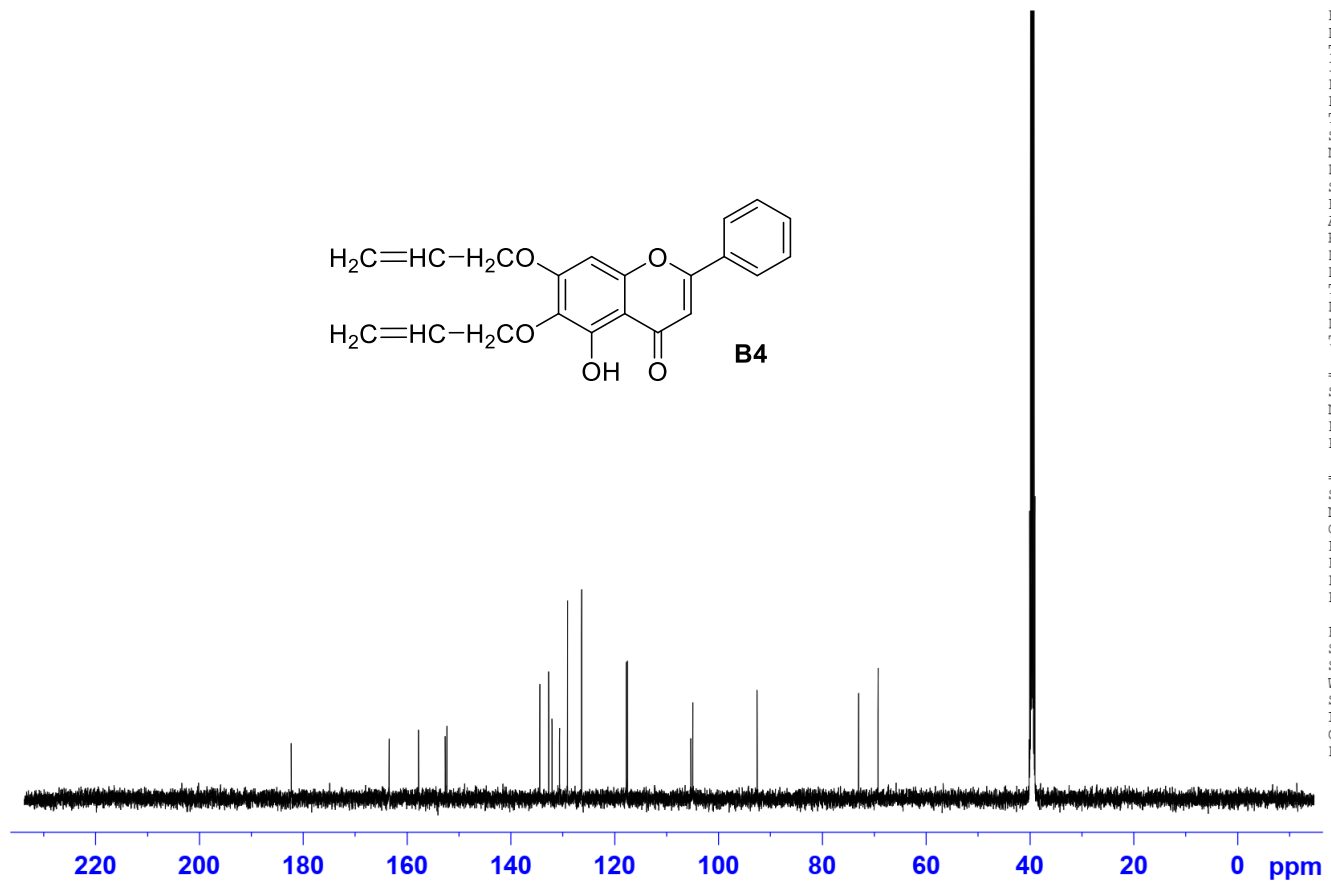

```
Current Data Parameters
NAME      110HUAN_BDAL
EXPNO     2
PROCNO    1

F2 - Acquisition Parameters
Date_     20191126
Time      17.15
INSTRUM   spect
PROBHD    5 mm PABBO BB/
PULPROG   zgpg30
TD         65536
SOLVENT   DMSO
NS         512
DS         4
SWH        31250.000 Hz
FIDRES     0.476837 Hz
AQ         1.0485760 sec
RG         198.57
DW         16.000 usec
DE         6.50 usec
TE         307.0 K
D1         2.00000000 sec
D11        0.03000000 sec
TD0        1

===== CHANNEL f1 =====
SFO1      125.7864591 MHz
NUC1       13C
P1         10.00 usec
PLW1       88.00000000 W

===== CHANNEL f2 =====
SFO2      500.1910008 MHz
NUC2       1H
CPDPRG[2] waltz16
PCPD2     80.00 usec
PLW2      22.00000000 W
PLW12     0.35764000 W
PLW13     0.17989001 W

F2 - Processing parameters
SI         32768
SF         125.7726956 MHz
WDW        EM
SSB        0
LB         1.00 Hz
GB         0
PC         1.40
```

# $^{13}\text{C}$ -NMR

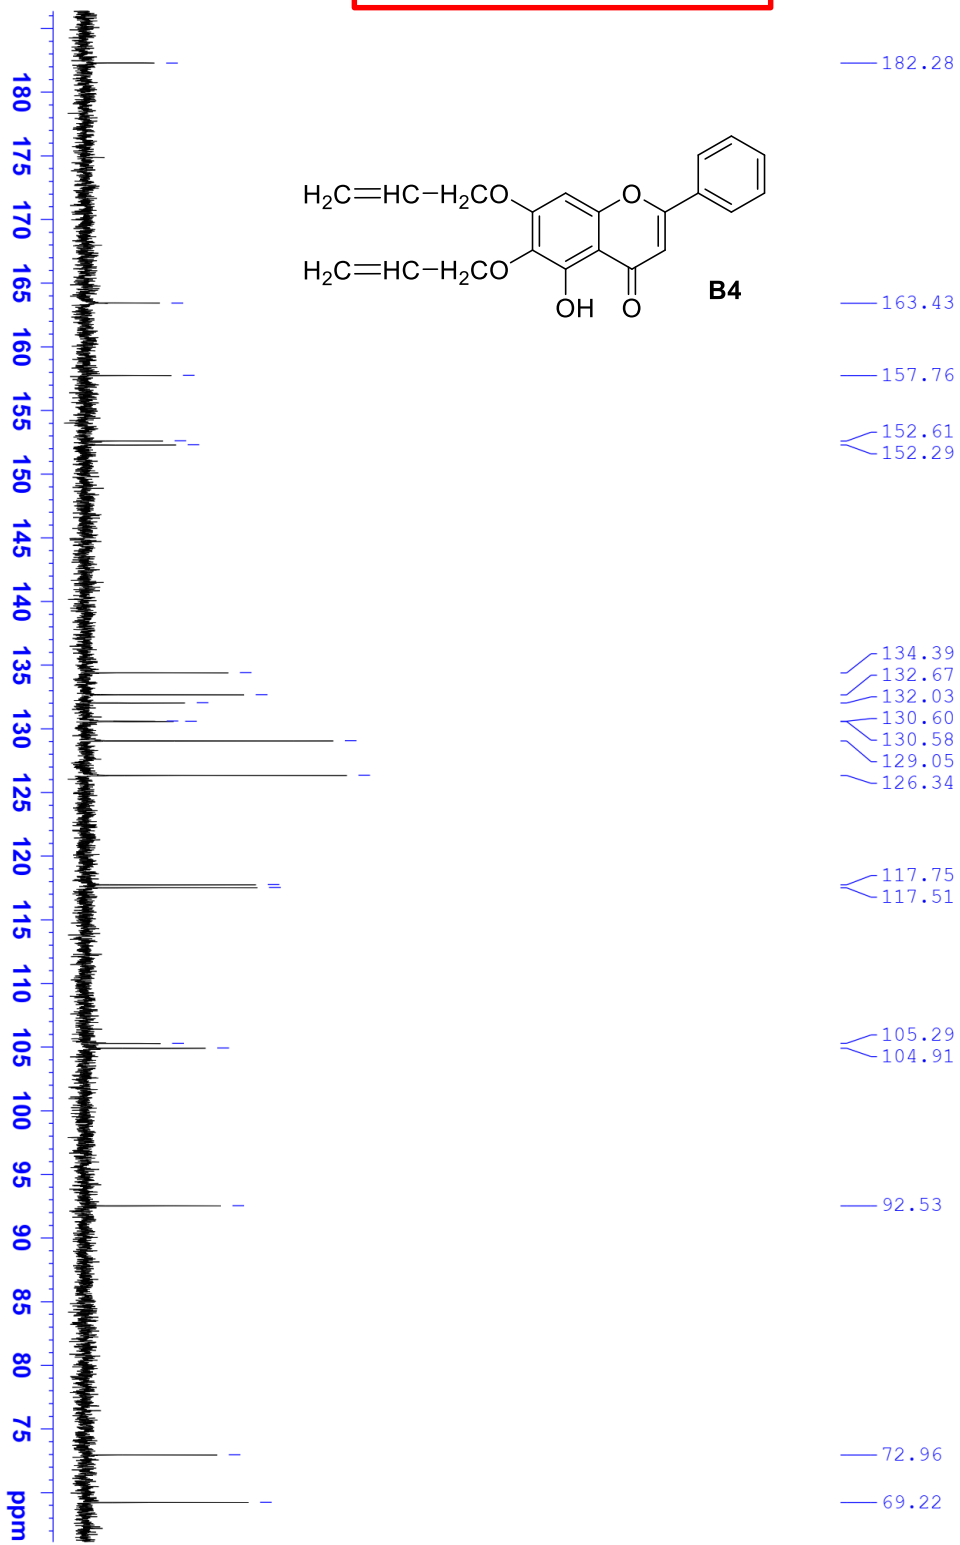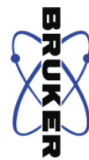

# <sup>13</sup>C-NMR

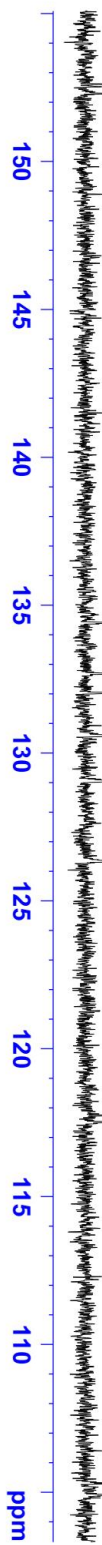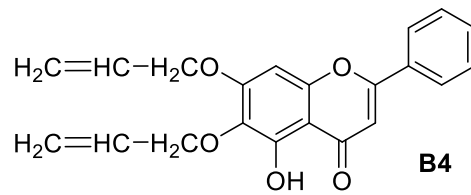

152.61  
152.29

134.39

132.67  
132.03

130.60  
130.58

129.05

126.34

117.75  
117.51

105.29  
104.91

**BDAL-DMSO-C13CPD**

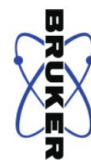



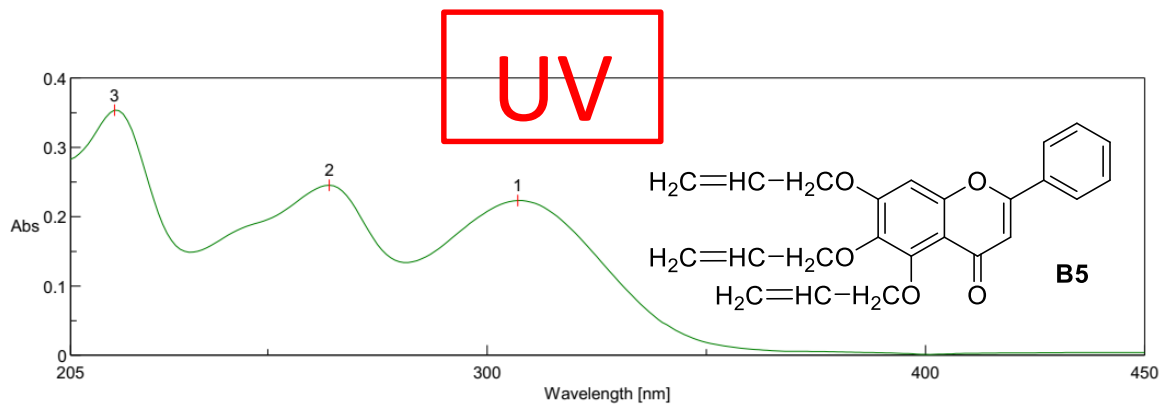

[ Result of Peak Picking ]

| No. | Position | Intensity | No. | Position | Intensity |
|-----|----------|-----------|-----|----------|-----------|
| 1   | 307      | 0.223122  | 2   | 264      | 0.245246  |
|     |          |           | 3   | 215      | 0.353469  |

**SHIMADZU**

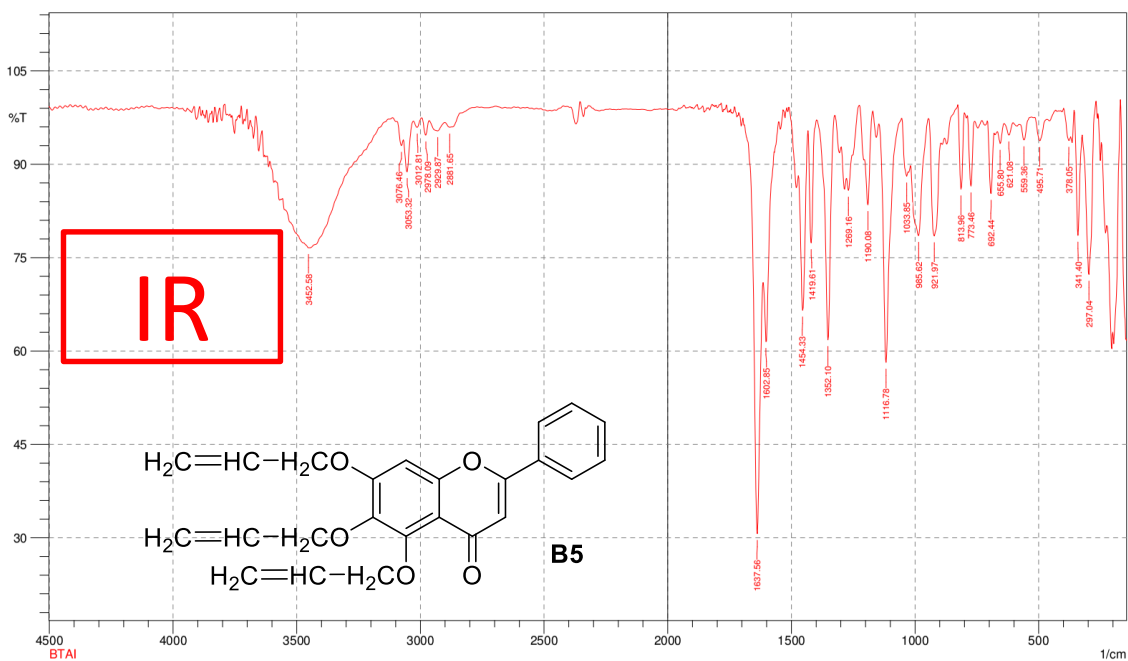

BTAI  
Sample name  
BTAI

Apodization;  
Resolution;  
No. of Scans;

Date/Time: 5/8/2020 5:35:02 PM  
User: IR-Prestige

# MS

## Qualitative Analysis Report

|                               |                       |                               |                                                          |
|-------------------------------|-----------------------|-------------------------------|----------------------------------------------------------|
| <b>Data Filename</b>          | BTAI 7.d              | <b>Sample Name</b>            | BTAI 7                                                   |
| <b>Sample Type</b>            | Sample                | <b>Position</b>               | P2-C3                                                    |
| <b>Instrument Name</b>        | Instrument 1          | <b>User Name</b>              |                                                          |
| <b>Acq Method</b>             | Cot ngan - MSMS_Pos.m | <b>Acquired Time</b>          | 04/08/2020 8:13:17 PM                                    |
| <b>IRM Calibration Status</b> | Success               | <b>DA Method</b>              | COTNGAN.M.m                                              |
| <b>Comment</b>                |                       |                               |                                                          |
| <b>Sample Group</b>           |                       | <b>Info.</b>                  |                                                          |
| <b>Stream Name</b>            | LC 1                  | <b>Acquisition SW Version</b> | 6200 series TOF/6500 series<br>Q-TOF B.06.01 (B6172 SP1) |

### User Chromatograms

Fragmentor Voltage 140 Collision Energy 0 Ionization Mode ESI

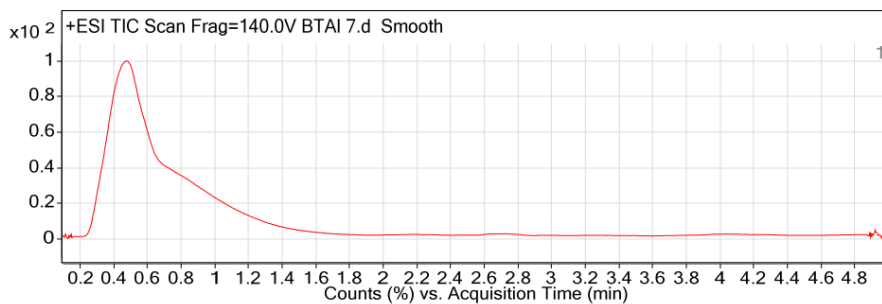

### User Spectra

Fragmentor Voltage 140 Collision Energy 0 Ionization Mode ESI

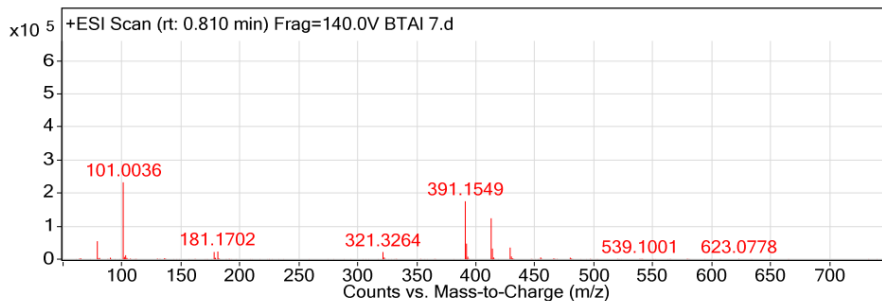

### Peak List

| m/z      | z | Abund     |
|----------|---|-----------|
| 79.0213  | 1 | 54313.98  |
| 101.0036 | 1 | 232908.31 |
| 391.1549 | 1 | 175124.36 |
| 392.1574 | 1 | 46811.03  |
| 413.1363 | 1 | 124046.12 |
| 803.2834 | 1 | 568929.69 |
| 804.2872 | 1 | 294397.13 |
| 805.2892 | 1 | 88924.84  |
| 819.257  | 1 | 166365.66 |
| 820.2596 | 1 | 80525.21  |

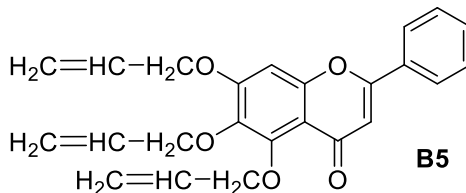

--- End Of Report ---

# MS

|               |          |             |                      |                 |              |                        |                       |
|---------------|----------|-------------|----------------------|-----------------|--------------|------------------------|-----------------------|
| Sample Name   | BTAI 7   | Position    | P2-C3                | Instrument Name | Instrument 1 | User Name              |                       |
| Inj Vol       | 2        | InjPosition |                      | SampleType      | Sample       | IRM Calibration Status | Success               |
| Data Filename | BTAI 7.d | ACQ Method  | Cot ngan - MSMS_Pos. | Comment         |              | Acquired Time          | 04/08/2020 8:13:17 PM |

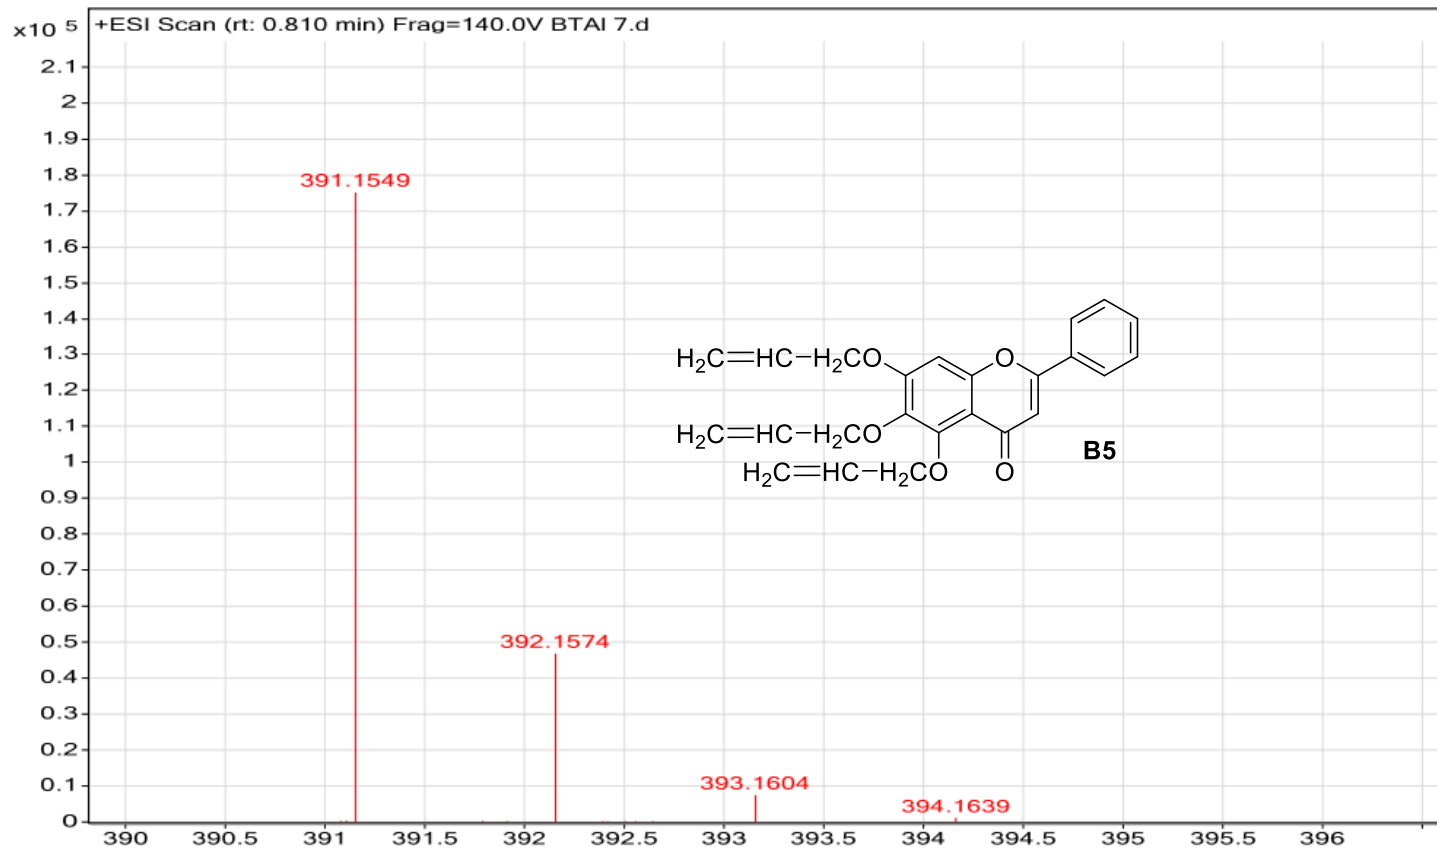

# <sup>1</sup>H-NMR

BTAL-DMSO-1H

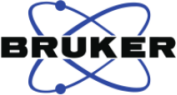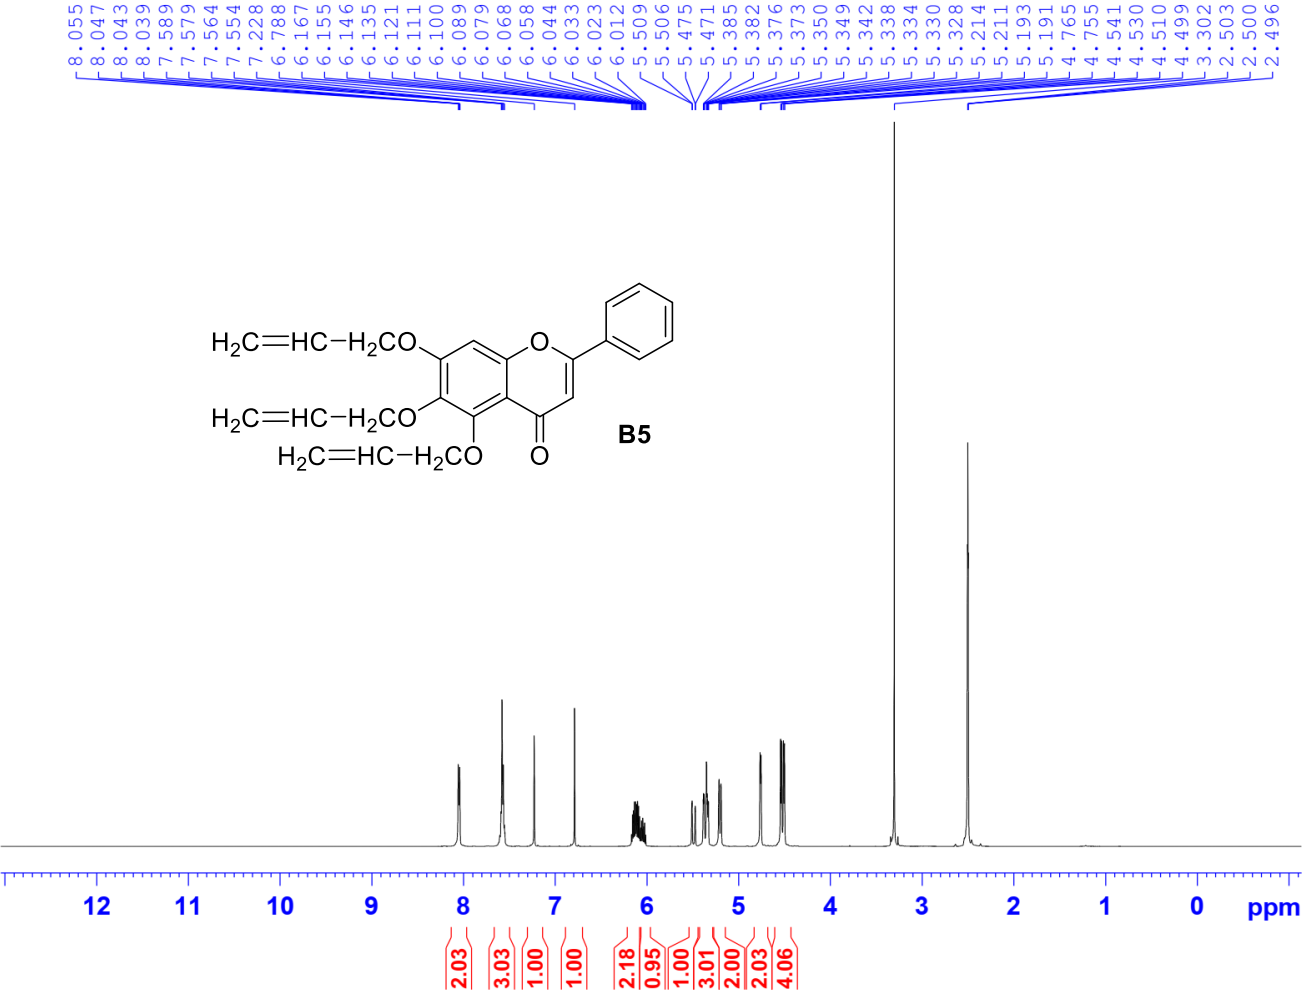

Current Data Parameters  
NAME 110HUAN\_BTAL  
EXPNO 10  
PROCNO 1

F2 - Acquisition Parameters  
Date\_ 20191126  
Time 11.18  
INSTRUM spect  
PROBHD 5 mm PABBO BB/  
PULPROG zg30  
TD 65536  
SOLVENT DMSO  
NS 16  
DS 2  
SWH 10000.000 Hz  
FIDRES 0.152588 Hz  
AQ 3.2767999 sec  
RG 111.09  
DW 50.000 usec  
DE 6.50 usec  
TE 304.0 K  
D1 1.00000000 sec  
TD0 1

==== CHANNEL f1 =====  
SF01 500.1920889 MHz  
NUC1 1H  
P1 10.20 usec  
PLW1 22.00000000 W

F2 - Processing parameters  
SI 65536  
SF 500.1890053 MHz  
WDW EM  
SSB 0  
LB 0.30 Hz  
GB 0  
PC 1.00

# <sup>1</sup>H-NMR

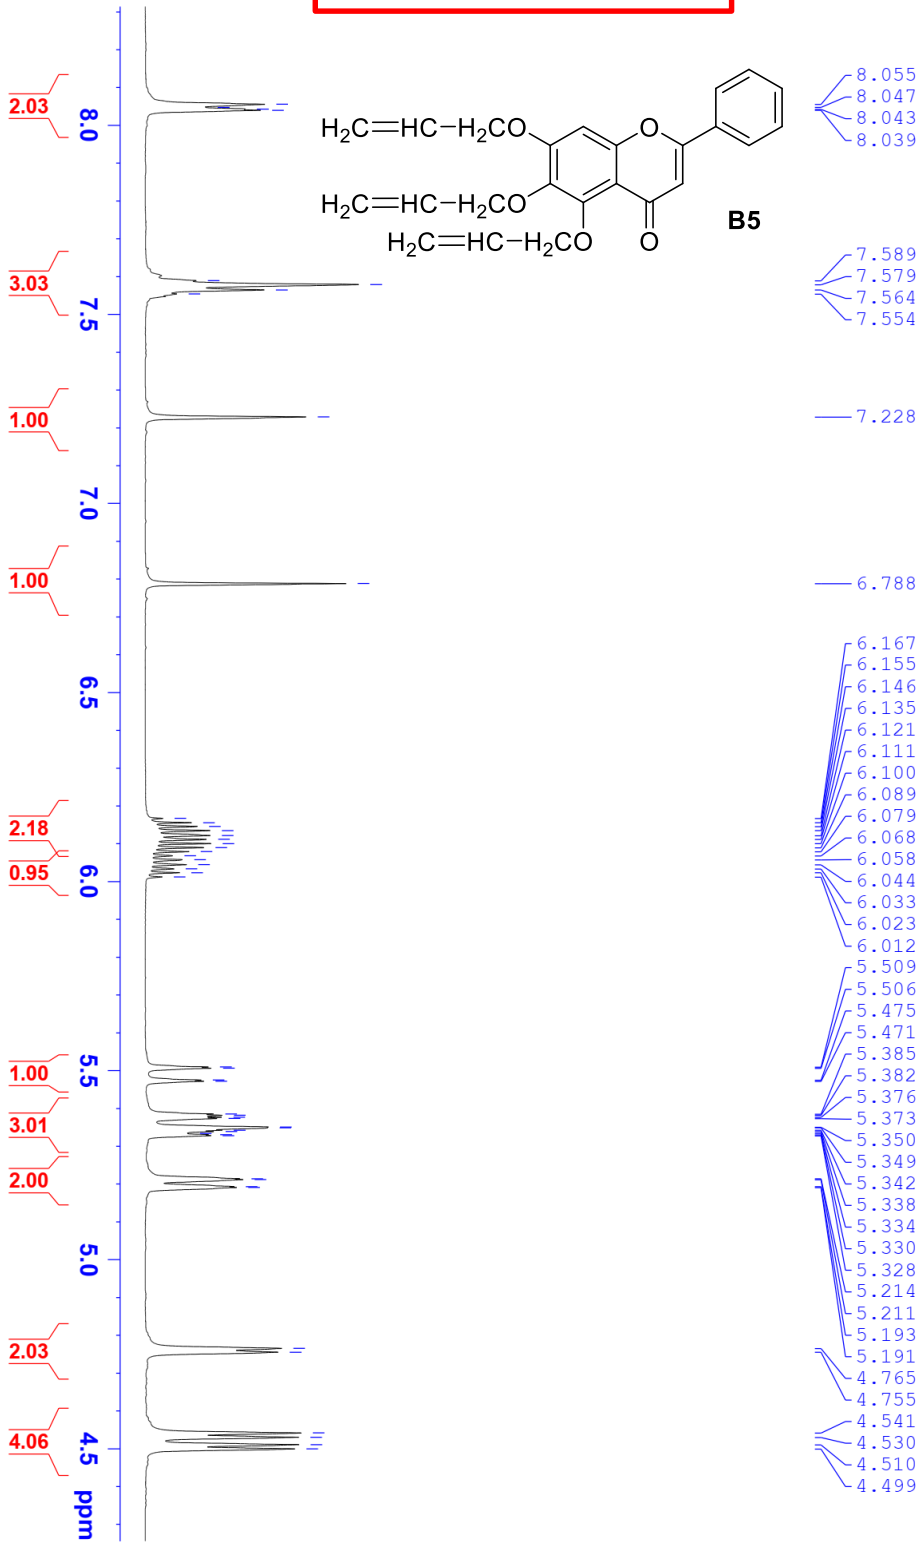

BTAL-DMSO-1H

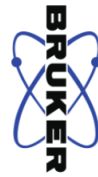

# <sup>1</sup>H-NMR

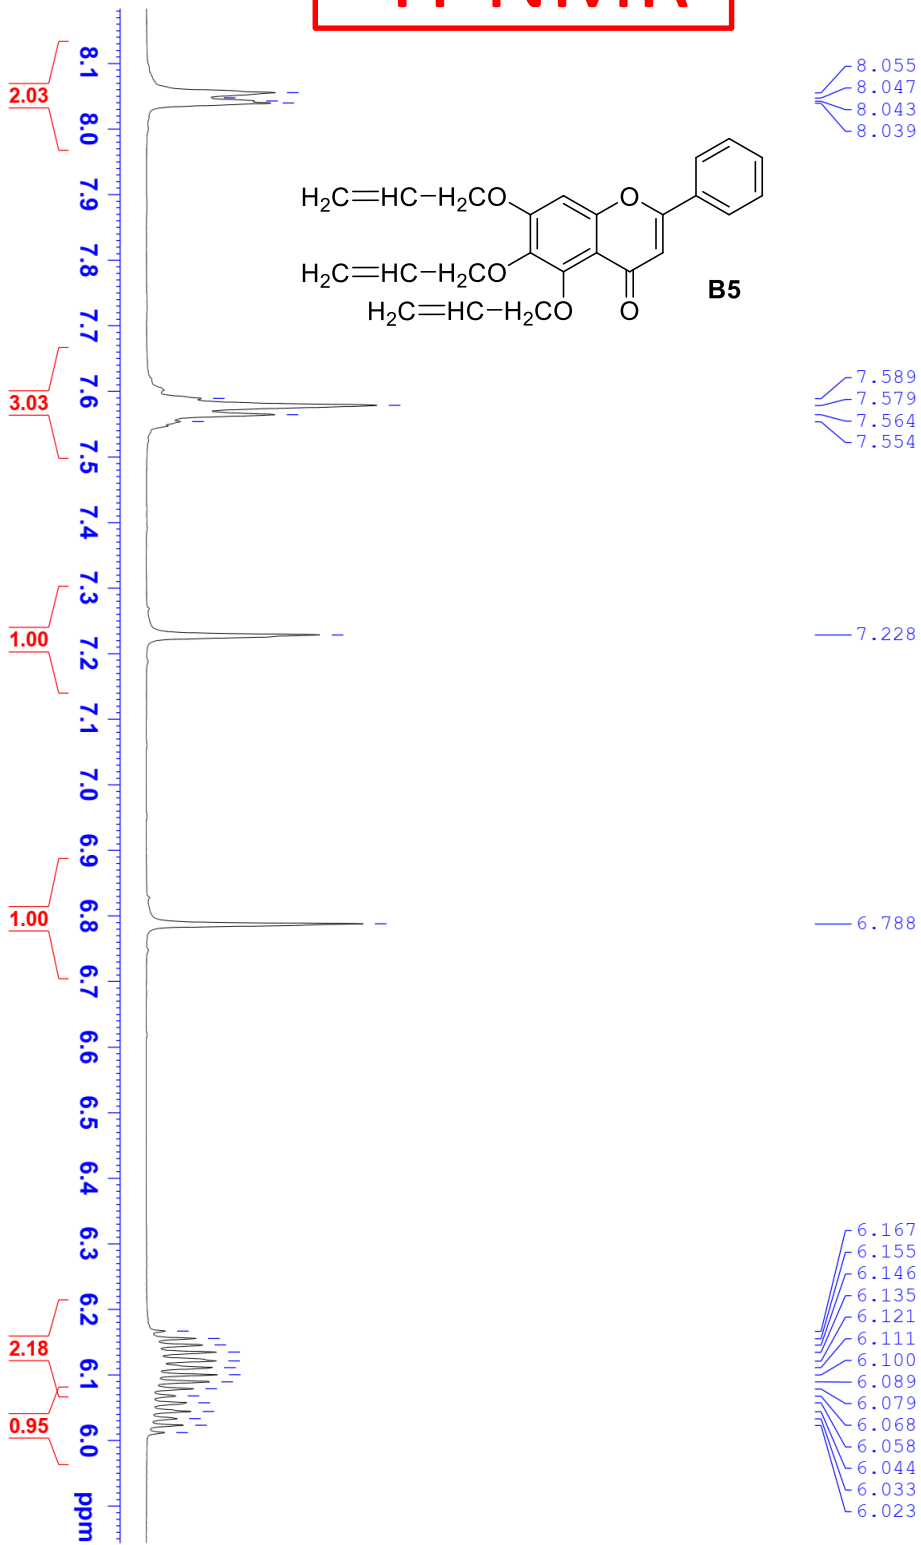

BT11-DMSO-1H

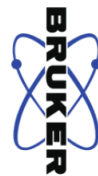

# <sup>1</sup>H-NMR

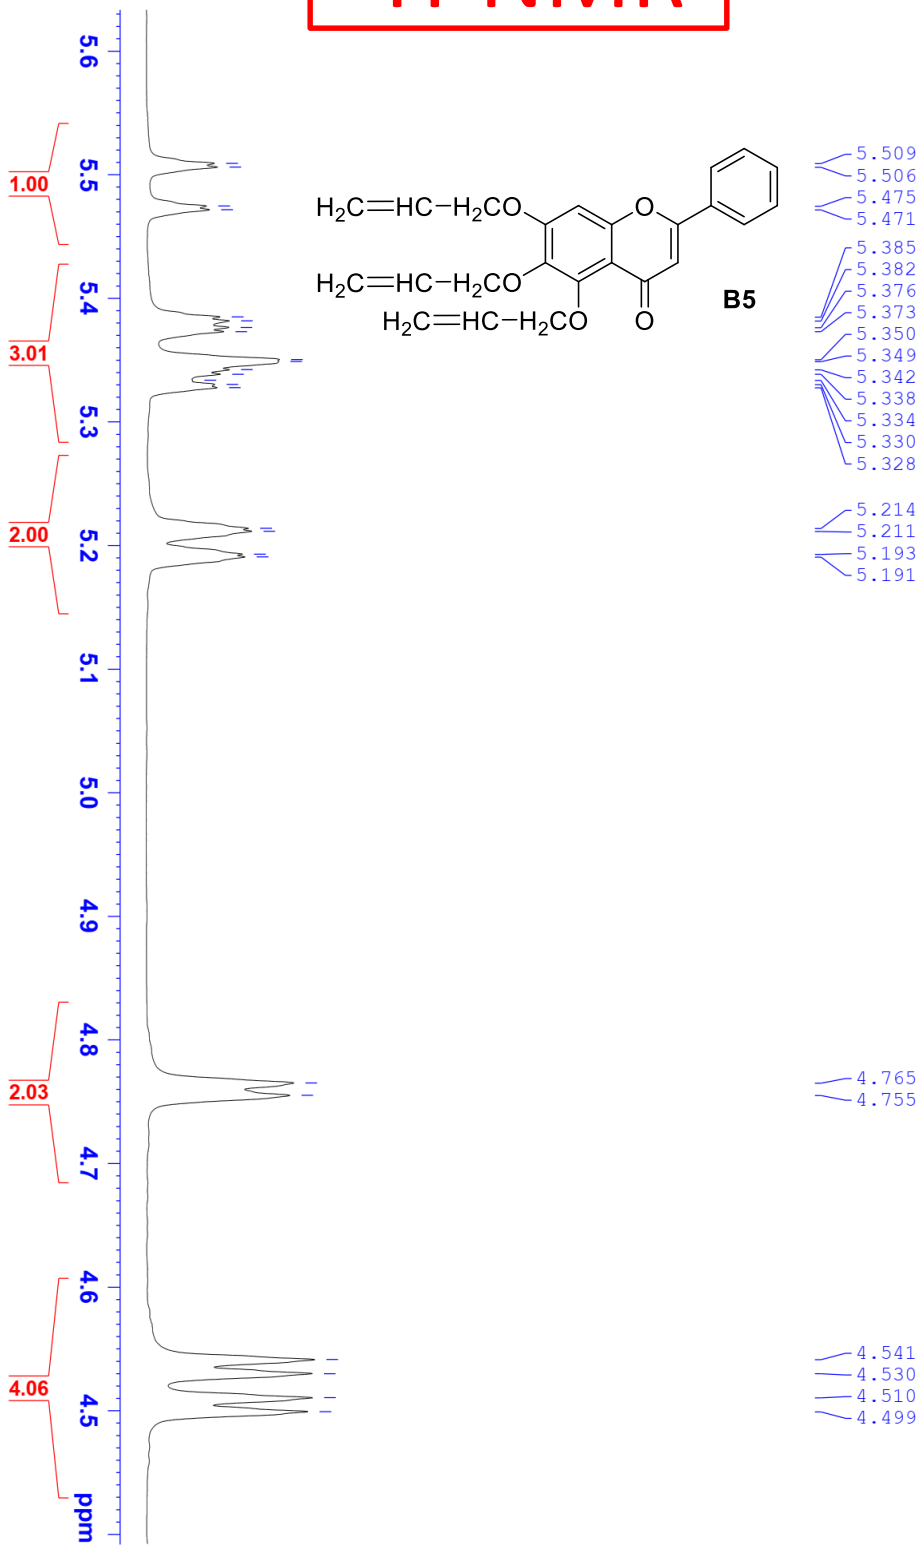

BTAL-DMSO-1H

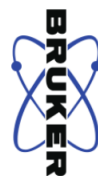

# <sup>13</sup>C-NMR

BTAL-DMSO-C13CPD

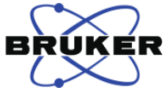

175.66  
160.09  
156.37  
153.83  
150.37  
138.75  
134.58  
134.27  
132.64  
131.41  
130.86  
128.97  
125.92  
117.83  
117.39  
117.21  
112.40  
107.52  
98.20  
74.99  
73.79  
69.22  
40.00  
39.83  
39.66  
39.50  
39.33  
39.16  
39.00

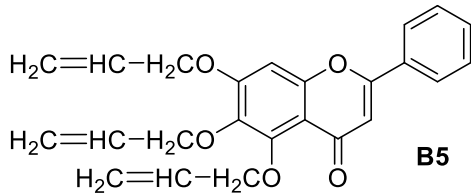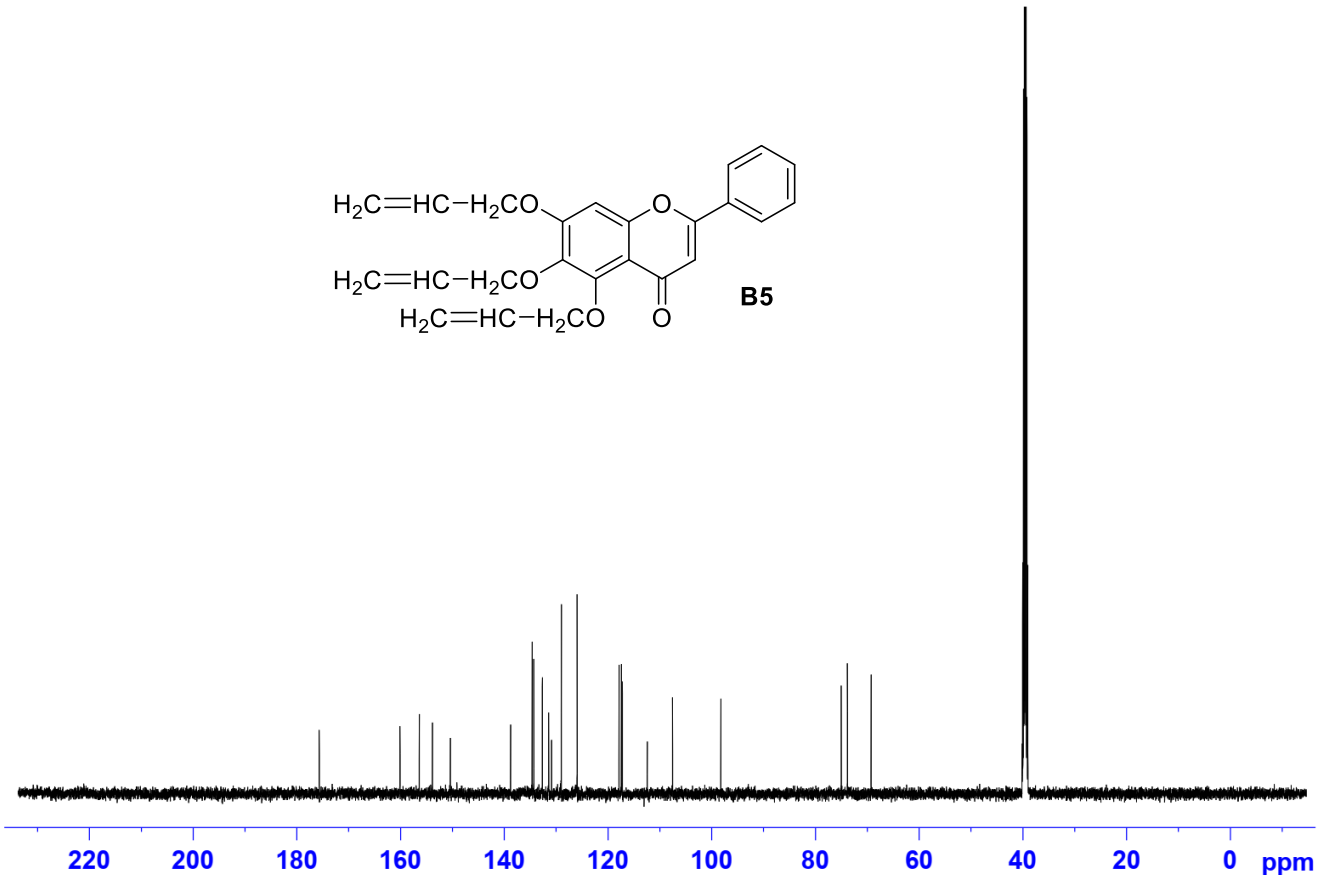

Current Data Parameters  
NAME 110HUAN\_BTAL  
EXPNO 2  
PROCNO 1

F2 - Acquisition Parameters  
Date\_ 20191126  
Time 13.41  
INSTRUM spect  
PROBHD 5 mm PABBO BB/  
PULPROG zgpg30  
TD 65536  
SOLVENT DMSO  
NS 256  
DS 4  
SWH 31250.000 Hz  
FIDRES 0.476837 Hz  
AQ 1.0485760 sec  
RG 198.57  
DW 16.000 usec  
DE 6.50 usec  
TE 305.0 K  
D1 2.00000000 sec  
D11 0.03000000 sec  
TD0 1

==== CHANNEL f1 =====  
SFO1 125.7864591 MHz  
NUC1 13C  
P1 10.00 usec  
PLW1 88.00000000 W

==== CHANNEL f2 =====  
SFO2 500.1910008 MHz  
NUC2 1H  
CPDPRG[2] waltz16  
PCPD2 80.00 usec  
PLW2 22.00000000 W  
PLW12 0.35764000 W  
PLW13 0.17989001 W

F2 - Processing parameters  
SI 32768  
SF 125.7726941 MHz  
WDW EM  
SSB 0  
LB 1.00 Hz  
GB 0  
PC 1.40



# $^{13}\text{C}$ -NMR

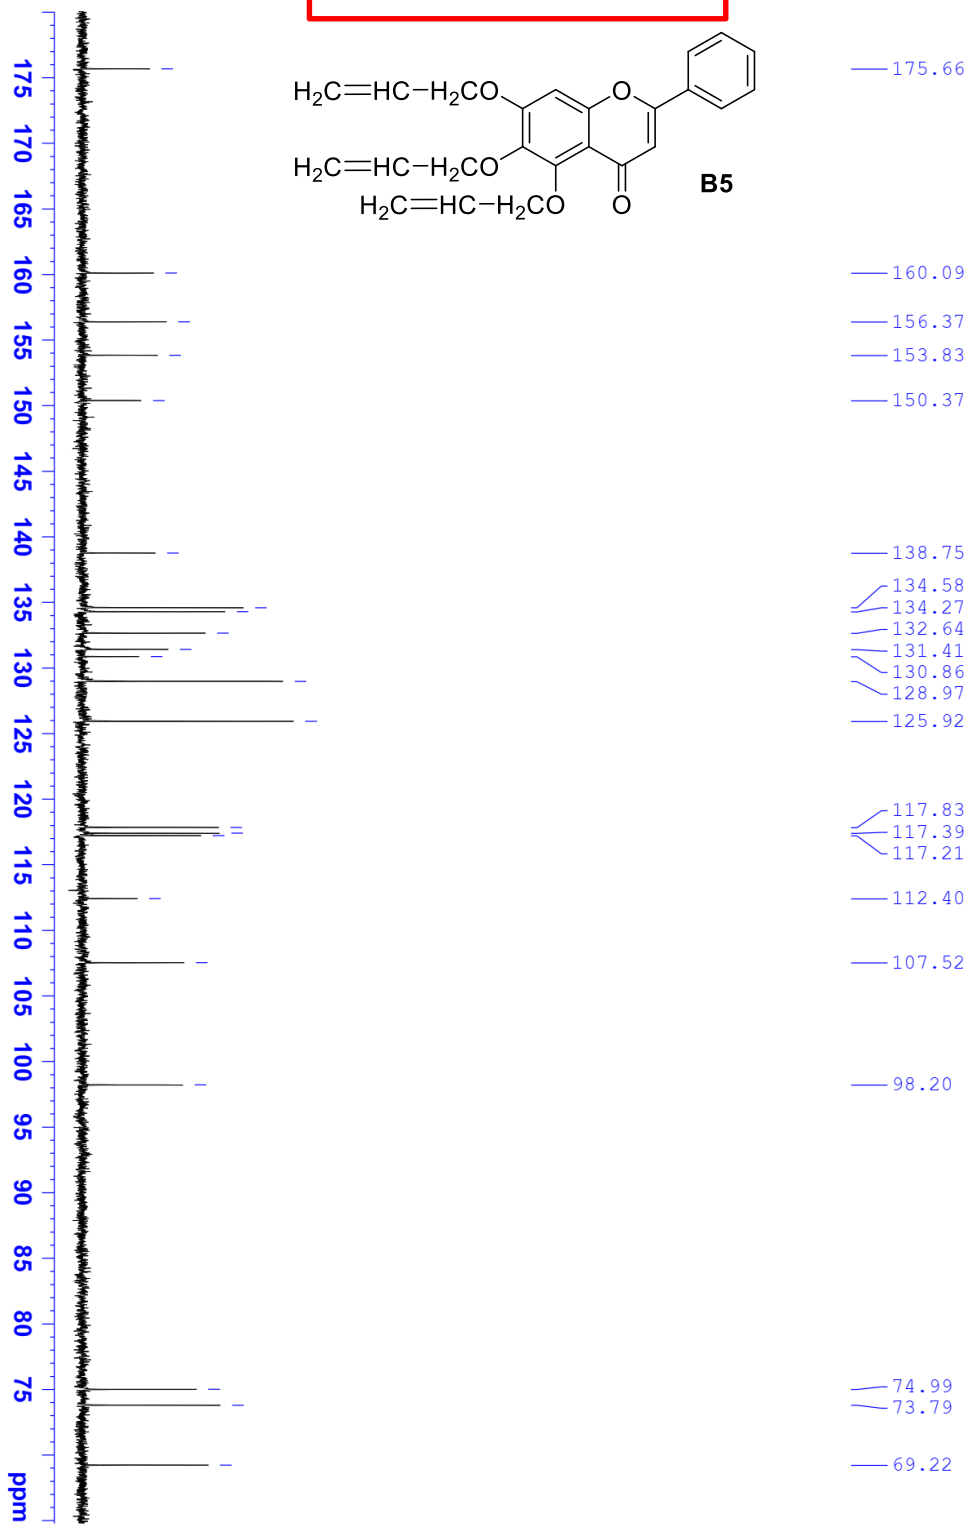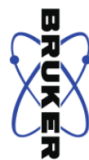

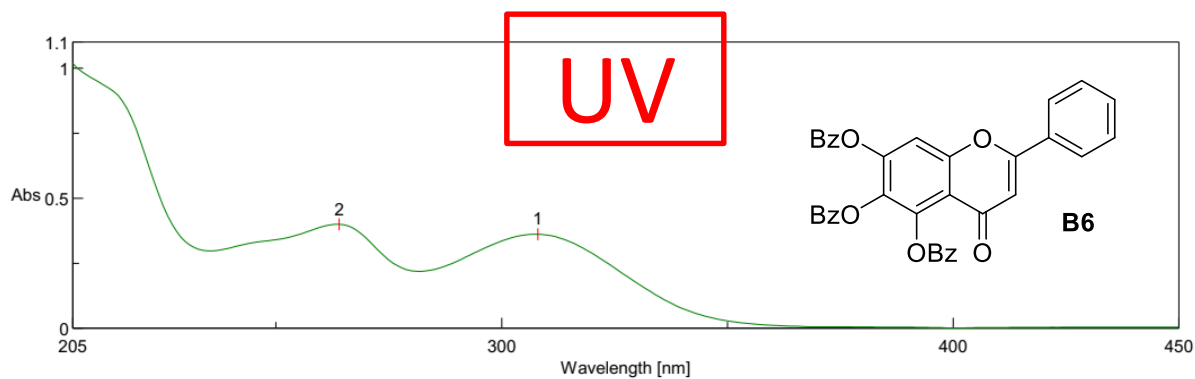

[ Result of Peak Picking ]

| No. | Position | Intensity | No. | Position | Intensity |
|-----|----------|-----------|-----|----------|-----------|
| 1   | 308      | 0.361351  | 2   | 264      | 0.399643  |

SHIMADZU

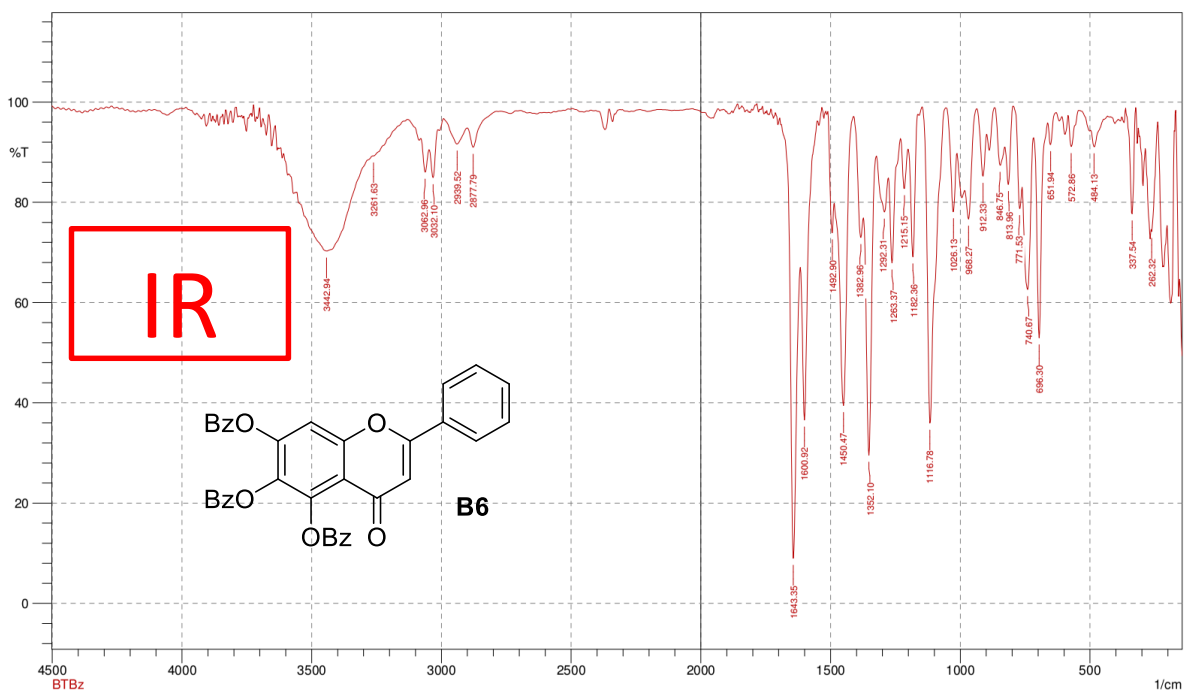

Sample name  
BTBz

Apodization;  
Resolution;  
No. of Scans;

Date/Time; 5/8/2020 2:41:42 PM  
User; IR-Prestige

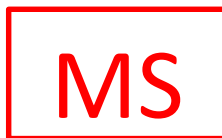

## Qualitative Analysis Report

**Data Filename** BTBZ 9.d **Sample Name** BTBZ 9  
**Sample Type** Sample **Position** P2-C2  
**Instrument Name** Instrument 1 **User Name**  
**Acq Method** Cot ngan - MSMS\_Pos.m **Acquired Time** 04/08/2020 8:07:43 PM  
**IRM Calibration Status** **Success** **DA Method** COTNGAN.M.m  
**Comment**  
**Sample Group** **Info.**  
**Stream Name** LC 1 **Acquisition SW** 6200 series TOF/6500 series  
**Version** Q-TOF B.06.01 (B6172 SP1)

### User Chromatograms

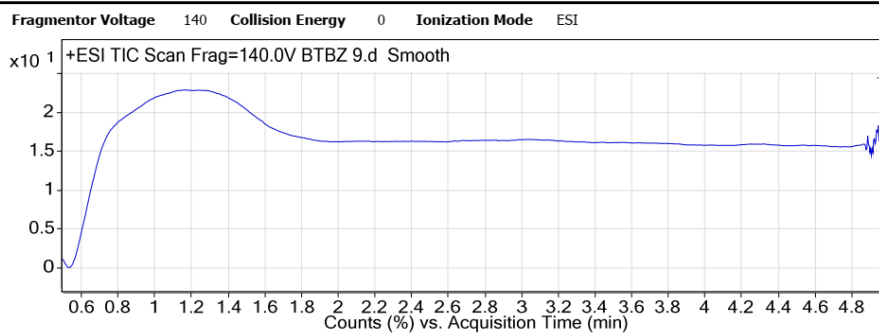

### User Spectra

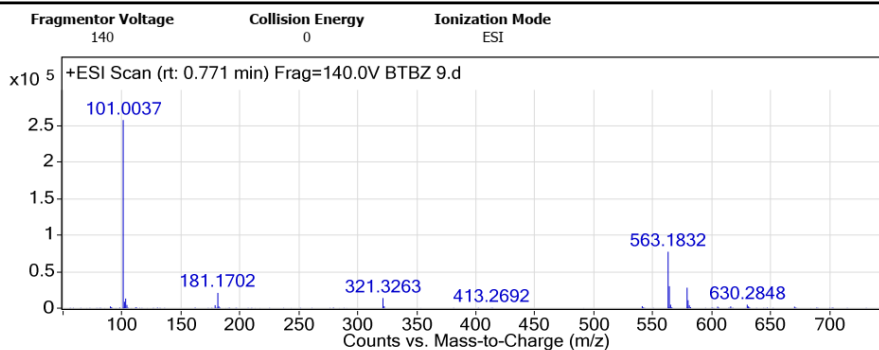

### Peak List

| <i>m/z</i> | <i>z</i> | Abund     |
|------------|----------|-----------|
| 101.0037   | 1        | 258011.27 |
| 102.006    | 1        | 8774.61   |
| 102.9991   | 1        | 13193.66  |
| 181.1702   | 1        | 20953.3   |
| 321.3263   | 1        | 13905.09  |
| 563.1832   | 1        | 77298.47  |
| 564.1861   | 1        | 30128.7   |
| 579.1568   | 1        | 28046.29  |
| 580.1599   | 1        | 10937.76  |
| 630.2848   | 1        | 4755.01   |

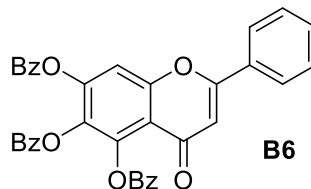

--- End Of Report ---

# MS

|               |          |             |                      |                 |              |                        |                       |
|---------------|----------|-------------|----------------------|-----------------|--------------|------------------------|-----------------------|
| Sample Name   | BTBZ 9   | Position    | P2-C2                | Instrument Name | Instrument 1 | User Name              |                       |
| Inj Vol       | 2        | InjPosition |                      | SampleType      | Sample       | IRM Calibration Status | Success               |
| Data Filename | BTBZ 9.d | ACQ Method  | Cot ngan - MSMS_Pos. | Comment         |              | Acquired Time          | 04/08/2020 8:07:43 PM |

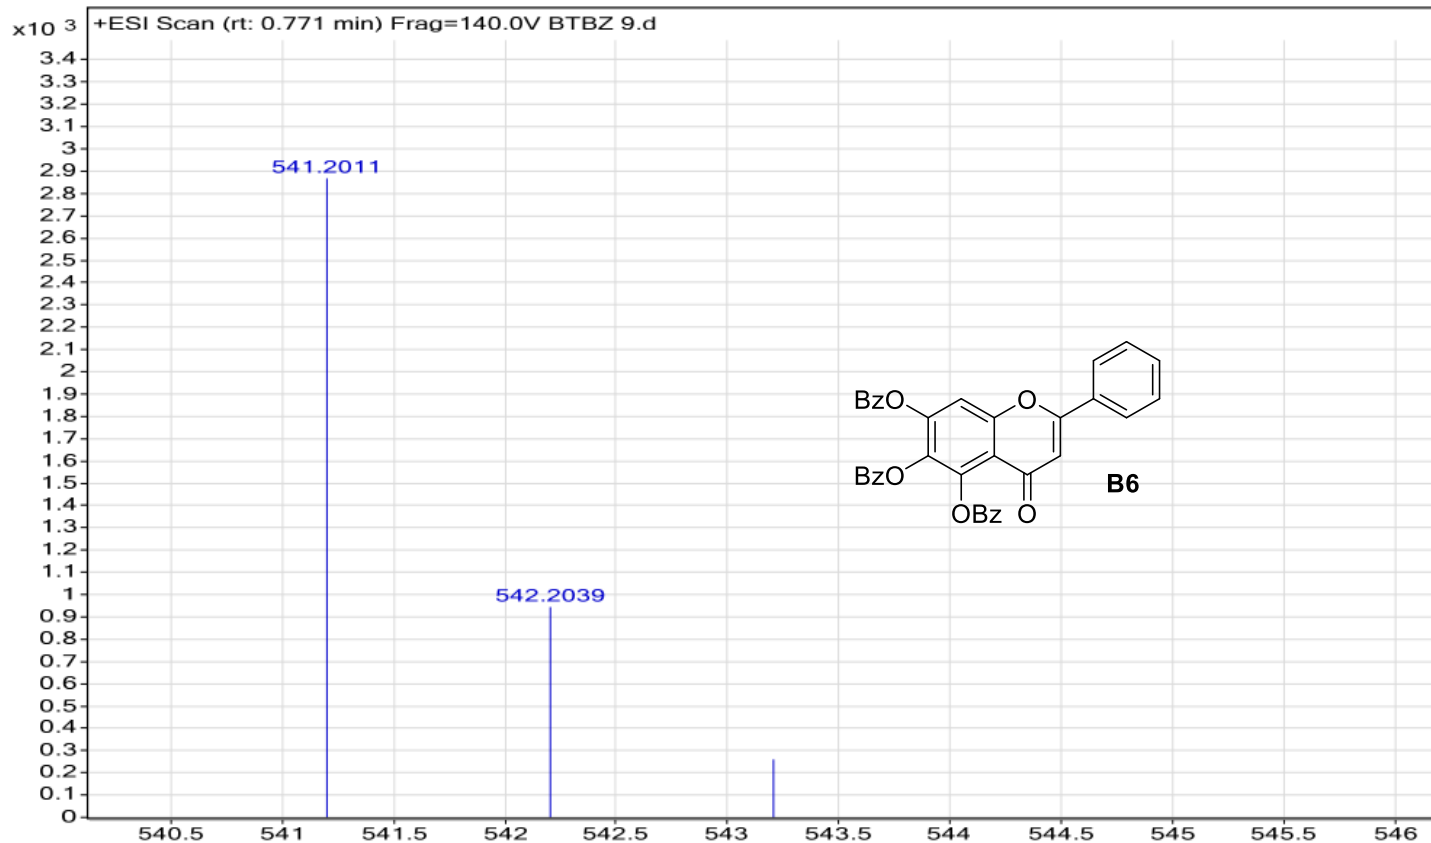

# <sup>1</sup>H-NMR

BTBZ-DMSO-1H

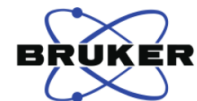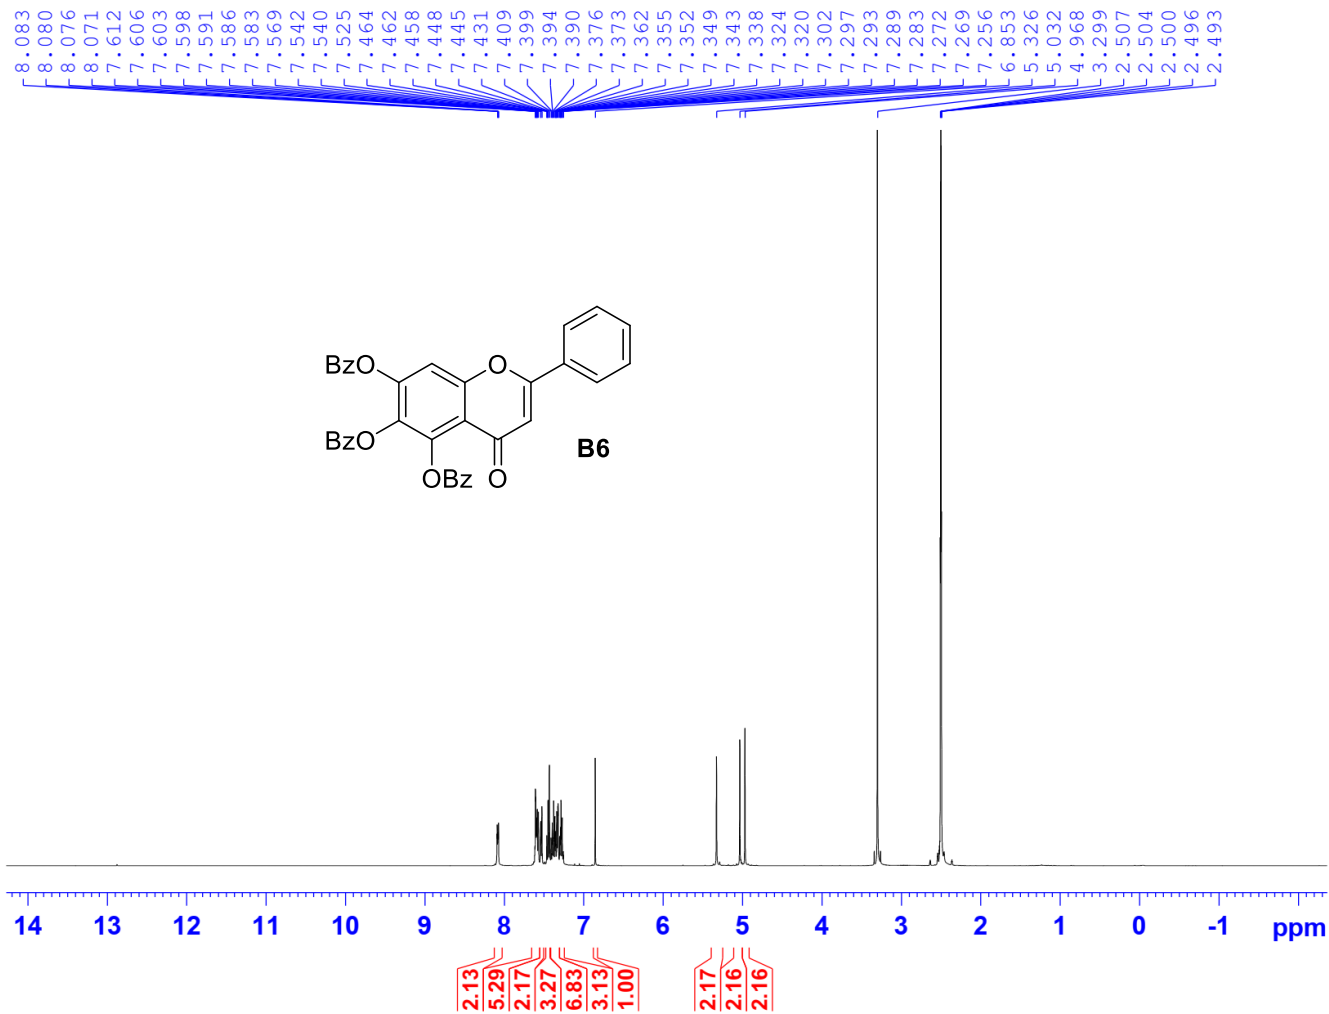

Current Data Parameters  
NAME 110HUAN\_BT BZ  
EXPNO 10  
PROCNO 1

F2 - Acquisition Parameters  
Date\_ 20191126  
Time 11.25  
INSTRUM spect  
PROBHD 5 mm PABBO BB/  
PULPROG zg30  
TD 65536  
SOLVENT DMSO  
NS 16  
DS 2  
SWH 10000.000 Hz  
FIDRES 0.152588 Hz  
AQ 3.2767999 sec  
RG 157.35  
DW 50.000 usec  
DE 6.50 usec  
TE 303.9 K  
D1 1.00000000 sec  
TDO 1

===== CHANNEL f1 =====  
SFO1 500.1920889 MHz  
NUC1 1H  
P1 10.20 usec  
PLW1 22.00000000 W

F2 - Processing parameters  
SI 65536  
SF 500.1890048 MHz  
WDW EM  
SSB 0  
LB 0.30 Hz  
GB 0  
PC 1.00

# <sup>1</sup>H-NMR

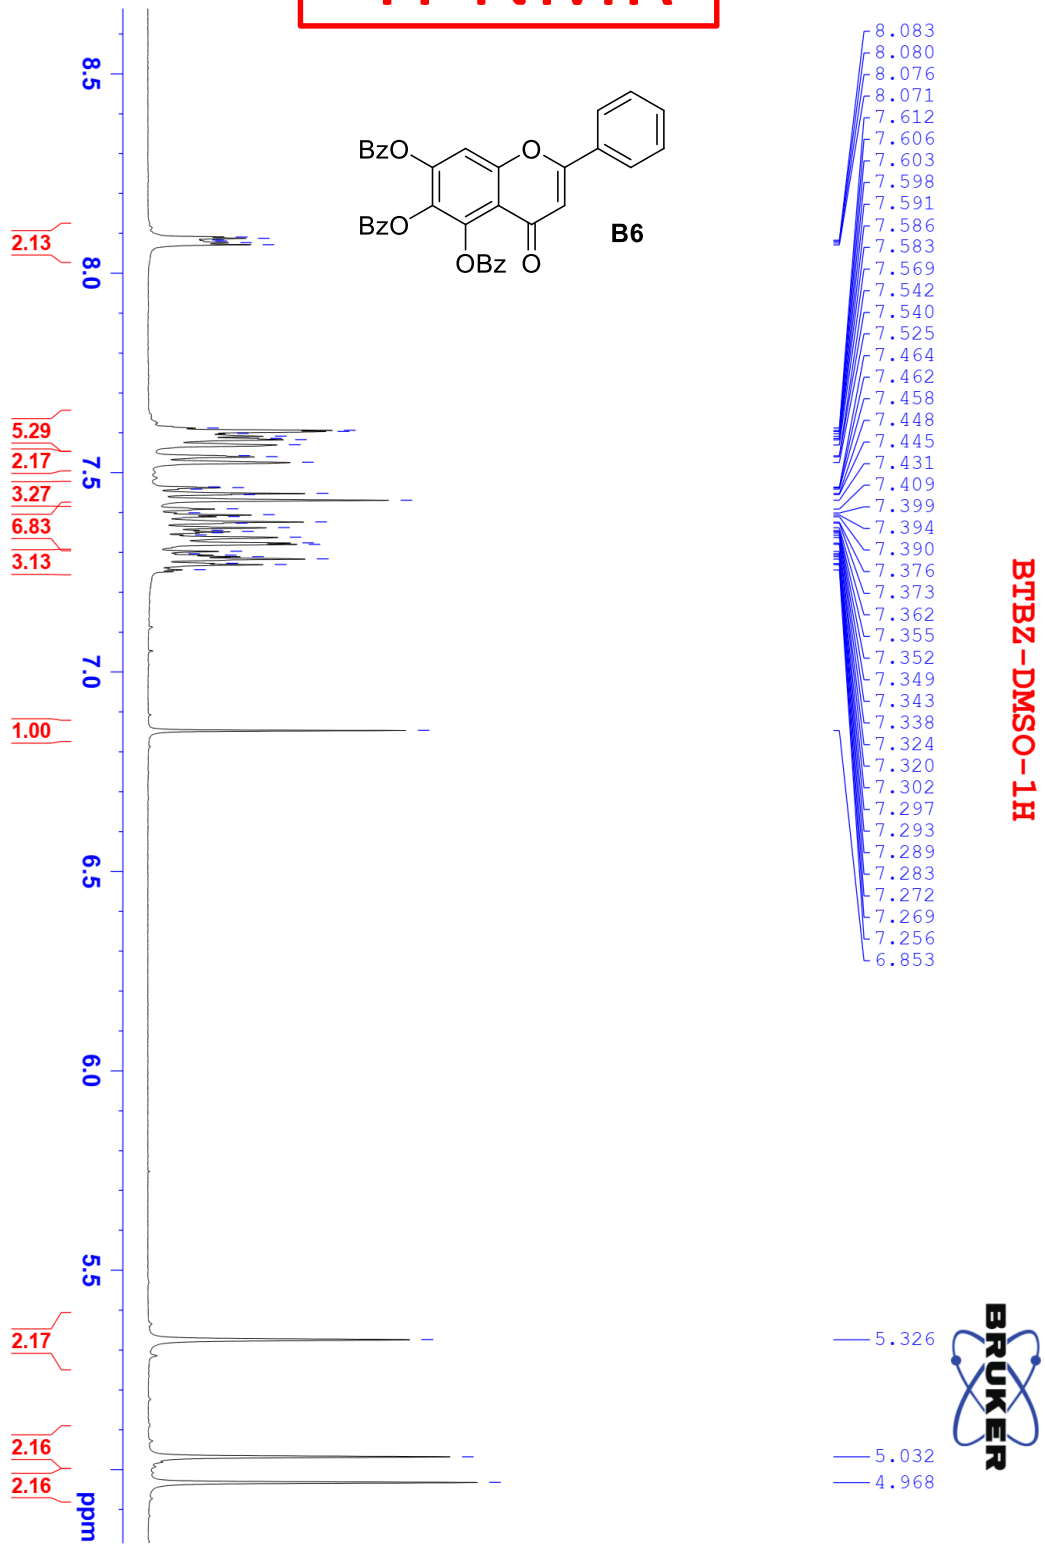

# $^1\text{H-NMR}$

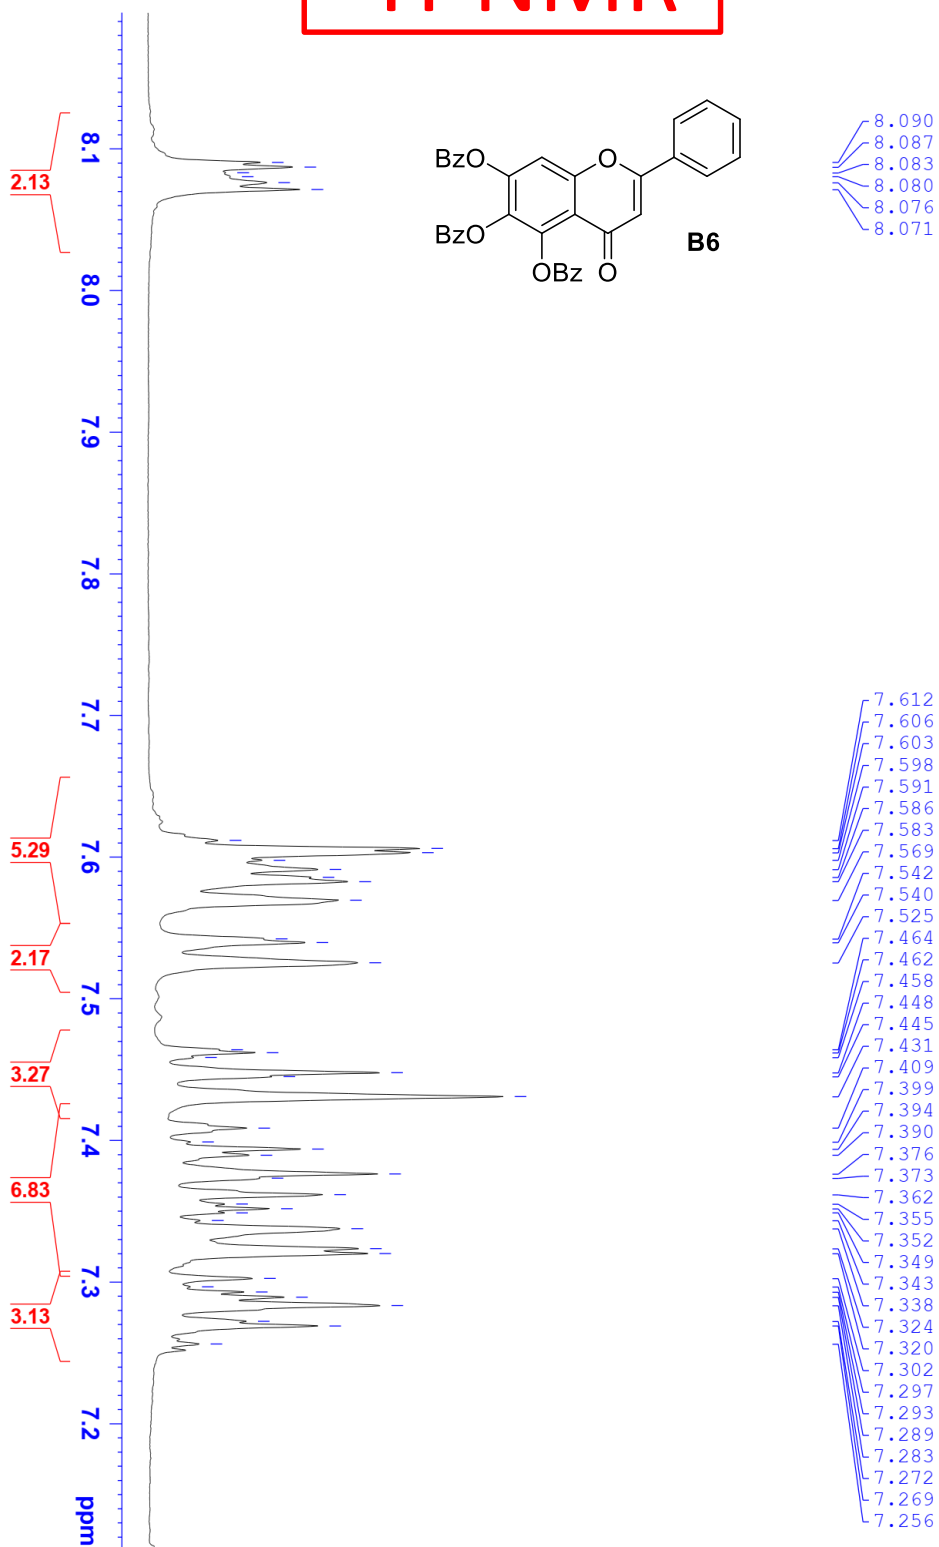

# <sup>13</sup>C-NMR

BTBZ-DMSO-C13CPD

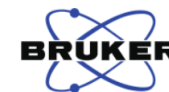

175.80  
160.23  
156.70  
154.03  
150.55  
139.16  
137.34  
137.06  
135.90  
131.48  
130.87  
129.02  
128.47  
128.32  
128.18  
128.04  
128.01  
127.88  
127.85  
127.76  
125.96  
112.58  
107.61  
98.58  
75.75  
74.94  
70.57  
40.00  
39.83  
39.66  
39.50  
39.33  
39.16  
39.00

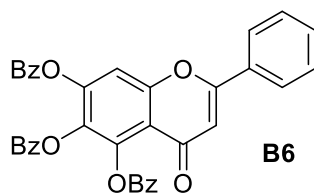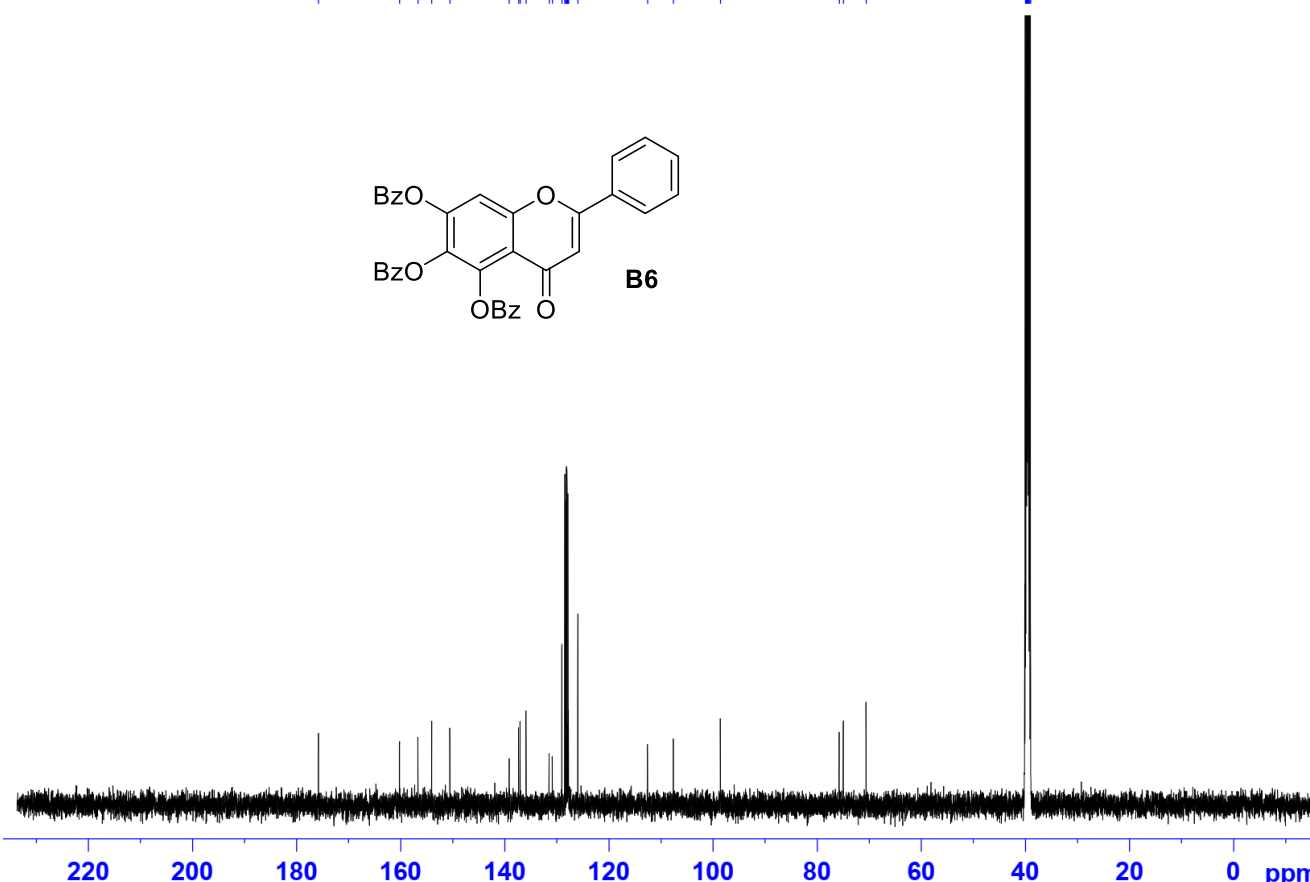

```
Current Data Parameters
NAME      110HUAN_BTZ
EXPNO     2
PROCNO    1

F2 - Acquisition Parameters
Date_     20191126
Time_     12.04
INSTRUM   spect
PROBHD    5 mm PABBO BB/
PULPROG   zgpg30
TD         65536
SOLVENT   DMSO
NS         2048
DS         4
SWH        31250.000 Hz
FIDRES     0.476837 Hz
AQ         1.0485760 sec
RG         198.57
DW         16.000 usec
DE         6.50 usec
TE         305.2 K
D1         2.00000000 sec
D11        0.03000000 sec
TD0        1

===== CHANNEL f1 =====
SFO1      125.7864591 MHz
NUC1       13C
P1         10.00 usec
PLW1       88.00000000 W

===== CHANNEL f2 =====
SFO2      500.1910008 MHz
NUC2       1H
CPDPRG[2] waltz16
PCPD2     80.00 usec
PLW2      22.00000000 W
PLW12     0.35764000 W
PLW13     0.17989001 W

F2 - Processing parameters
SI         32768
SF         125.7726241 MHz
WDW        EM
SSB        0
LB         1.00 Hz
GB         0
PC         1.40
```



# $^{13}\text{C}$ -NMR

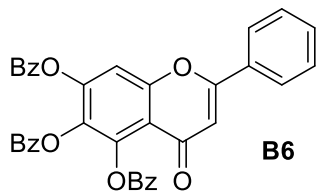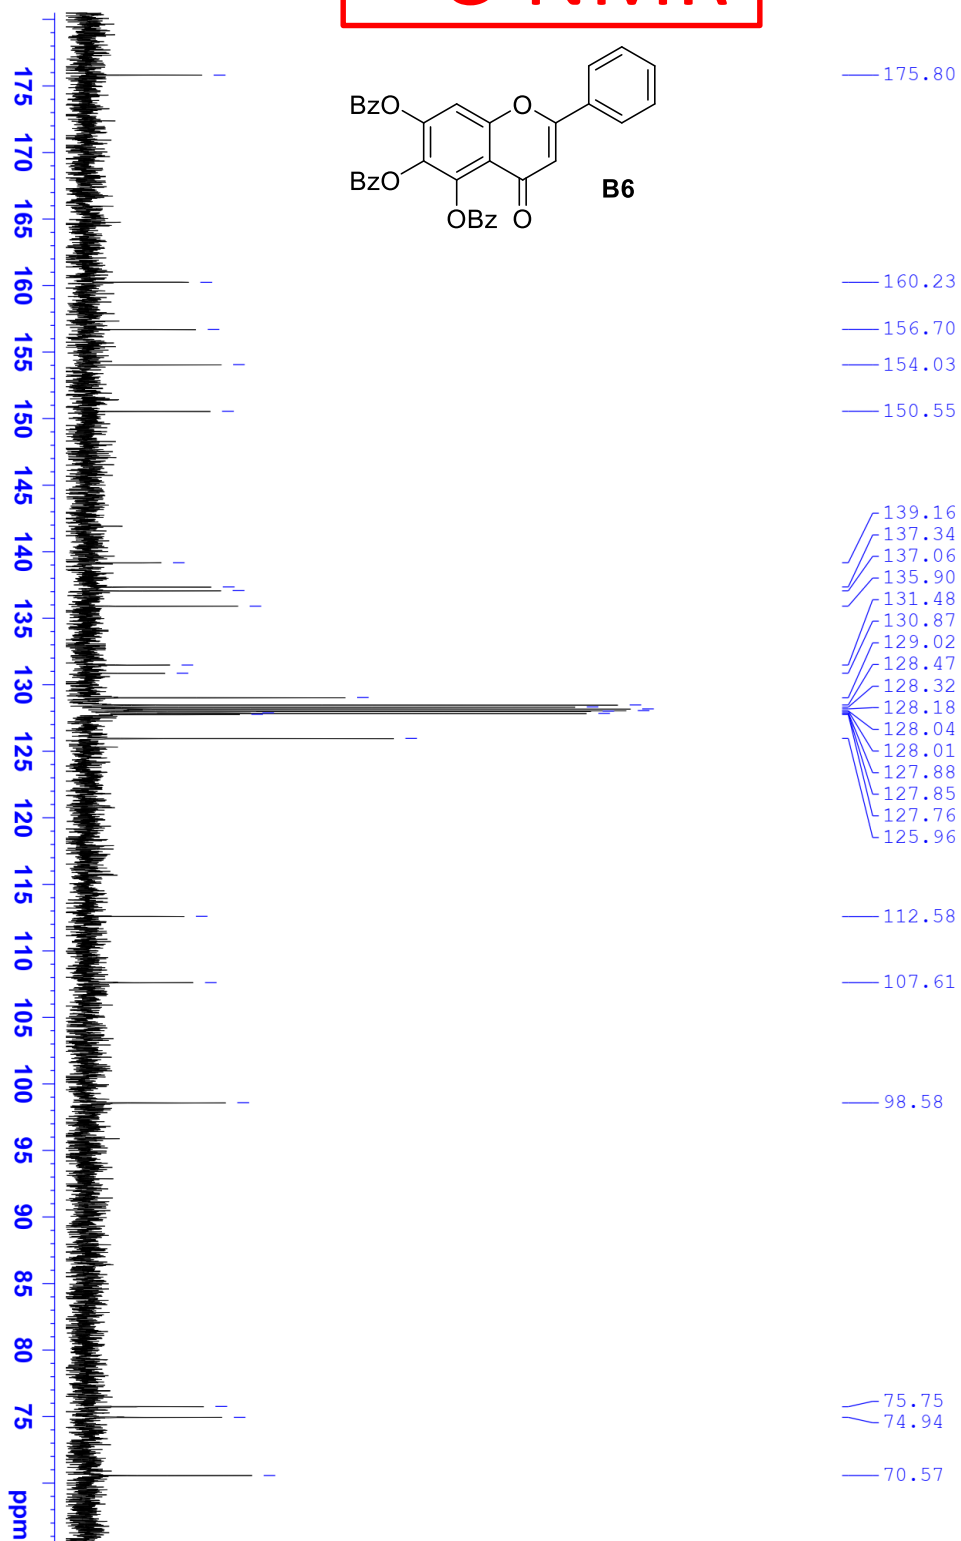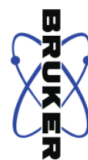

# $^{13}\text{C}$ -NMR

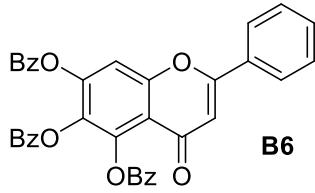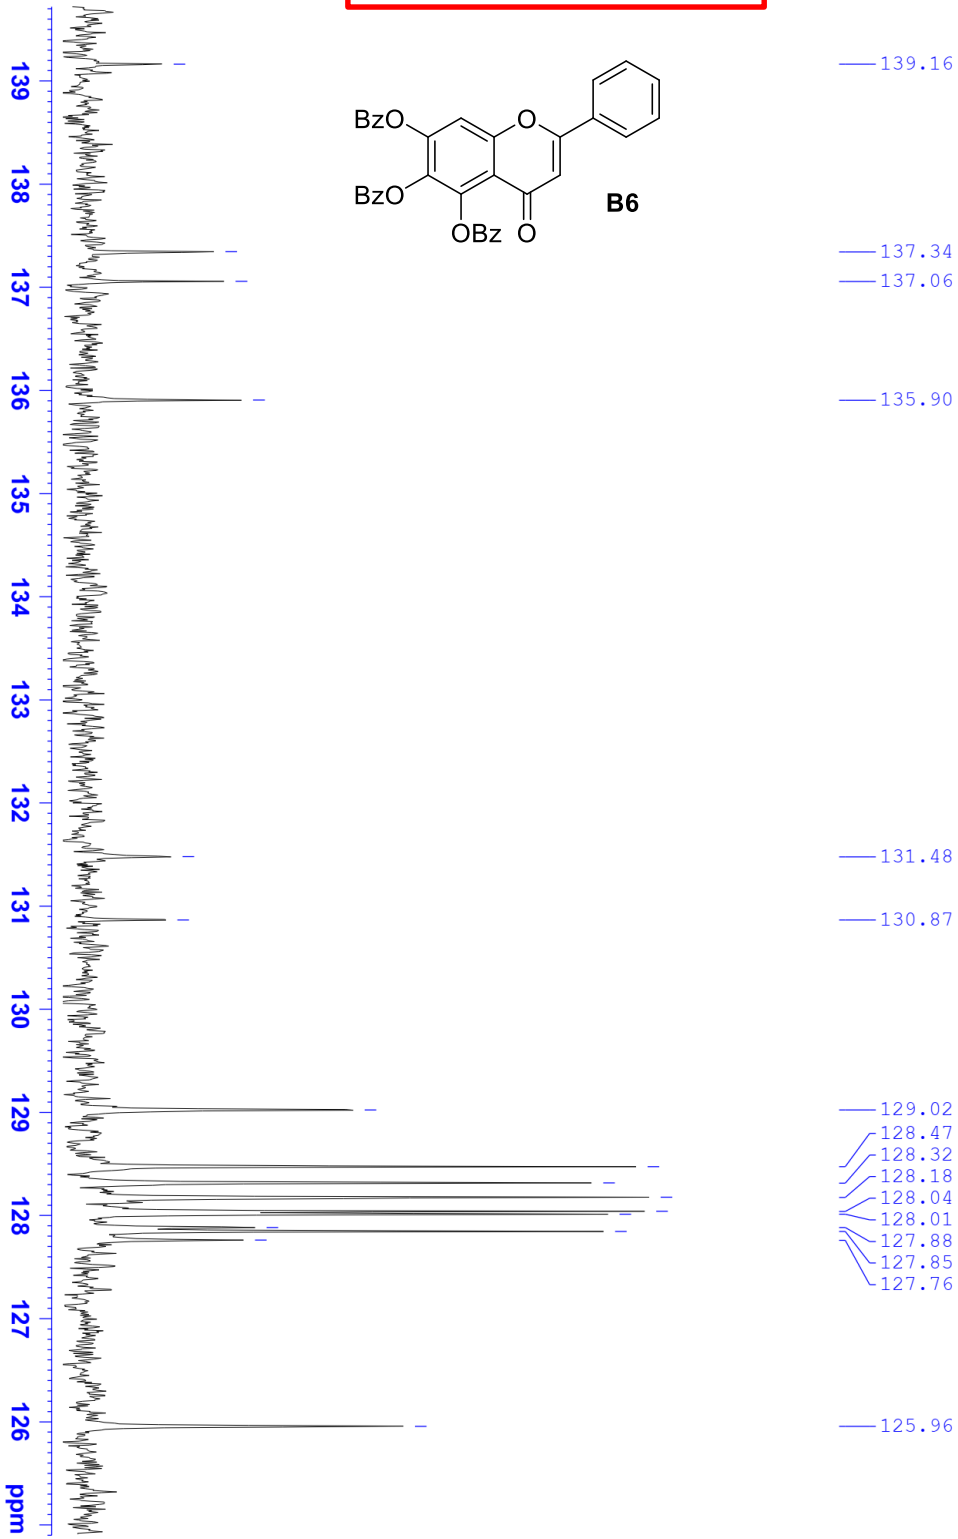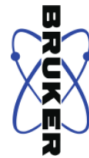

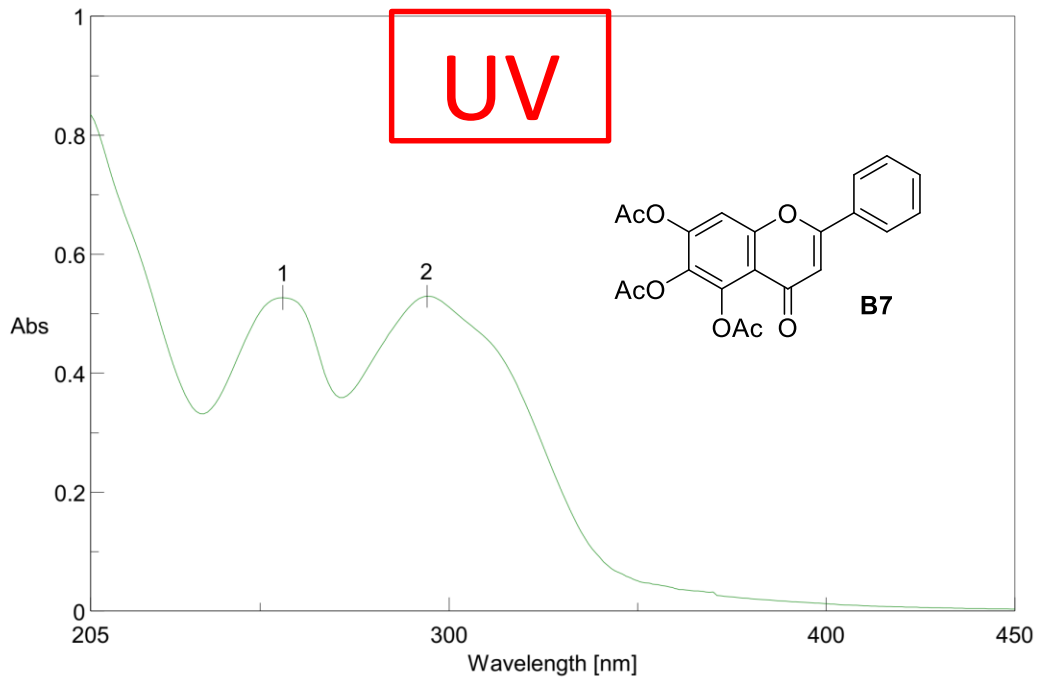

[ Result of Peak Picking ]

| No. | Position | Intensity | No. | Position | Intensity |
|-----|----------|-----------|-----|----------|-----------|
| 1   | 256      | 0.526452  | 2   | 294      | 0.529178  |

SHIMADZU

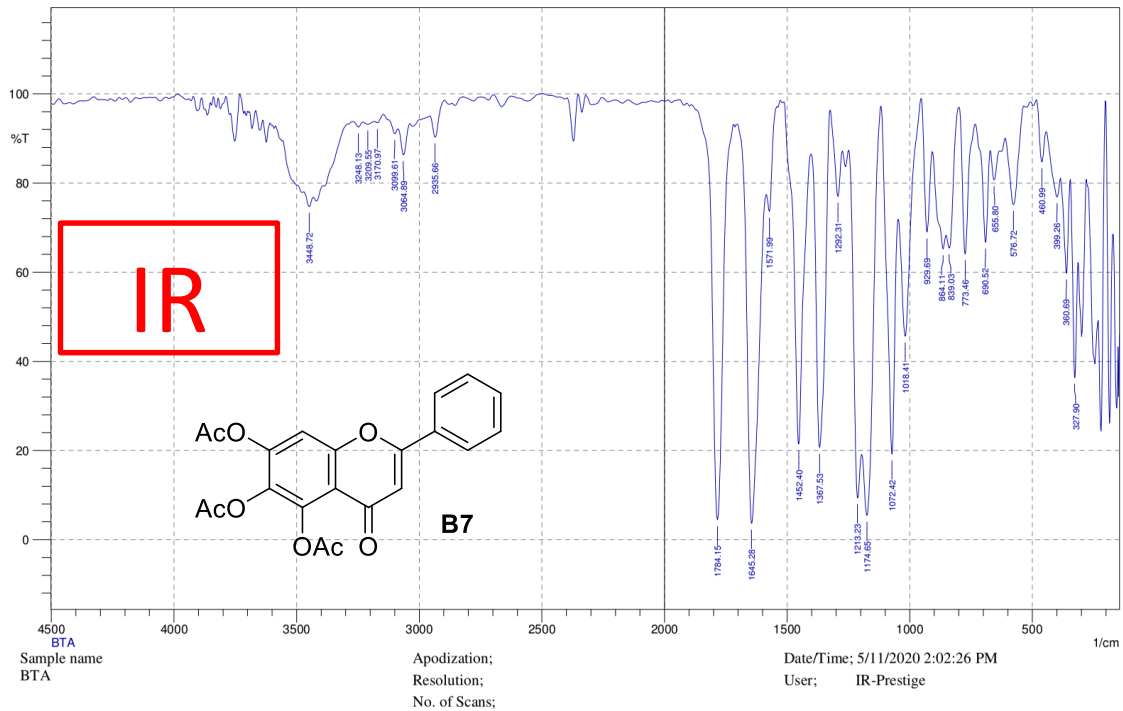

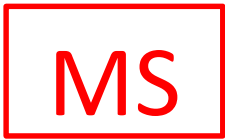

# Qualitative Analysis Report

**Data Filename** BTA 10.d **Sample Name** BTA 10  
**Sample Type** Sample **Position** P2-B1  
**Instrument Name** Instrument 1 **User Name**  
**Acq Method** Cot ngan - MSMS\_Pos.m **Acquired Time** 04/08/2020 7:12:04 PM  
**IRM Calibration Status** **Success** **DA Method** COTNGAN.M.m  
**Comment**  
**Sample Group** **Info.**  
**Stream Name** LC 1 **Acquisition SW** 6200 series TOF/6500 series  
**Version** Q-TOF B.06.01 (B6172 SP1)

## User Chromatograms

**Fragmentor Voltage** 140 **Collision Energy** 0 **Ionization Mode** ESI

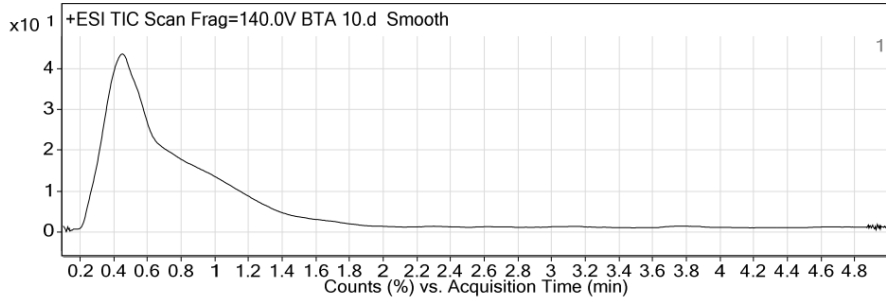

## User Spectra

**Fragmentor Voltage** 140 **Collision Energy** 0 **Ionization Mode** ESI

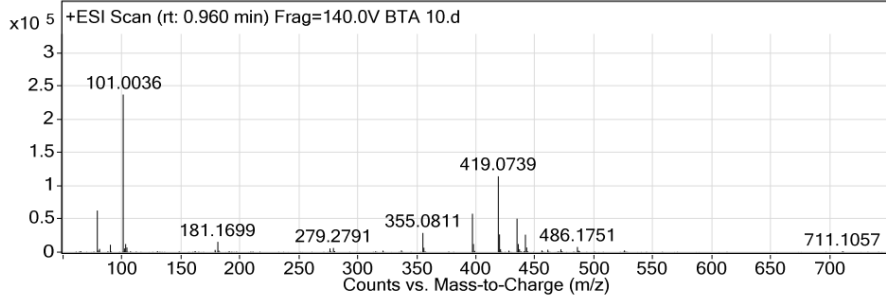

## Peak List

| m/z      | z | Abund     |
|----------|---|-----------|
| 79.0213  | 1 | 62825.86  |
| 101.0036 | 1 | 237001.98 |
| 397.0916 | 1 | 57811.62  |
| 419.0739 | 1 | 114020.98 |
| 435.0476 | 1 | 50508.92  |
| 815.1593 | 1 | 282822.72 |
| 816.1616 | 1 | 139684.63 |
| 831.133  | 1 | 223102.61 |
| 832.1356 | 1 | 108772.73 |
| 833.1357 | 1 | 42507.65  |

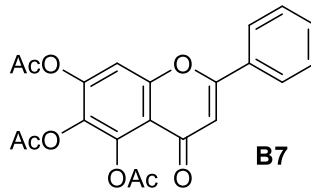

--- End Of Report ---

# MS

|               |          |             |                      |                 |              |                        |                       |
|---------------|----------|-------------|----------------------|-----------------|--------------|------------------------|-----------------------|
| Sample Name   | BTA 10   | Position    | P2-B1                | Instrument Name | Instrument 1 | User Name              |                       |
| Inj Vol       | 2        | InjPosition |                      | SampleType      | Sample       | IRM Calibration Status | Success               |
| Data Filename | BTA 10.d | ACQ Method  | Cot ngan - MSMS_Pos. | Comment         |              | Acquired Time          | 04/08/2020 7:12:04 PM |

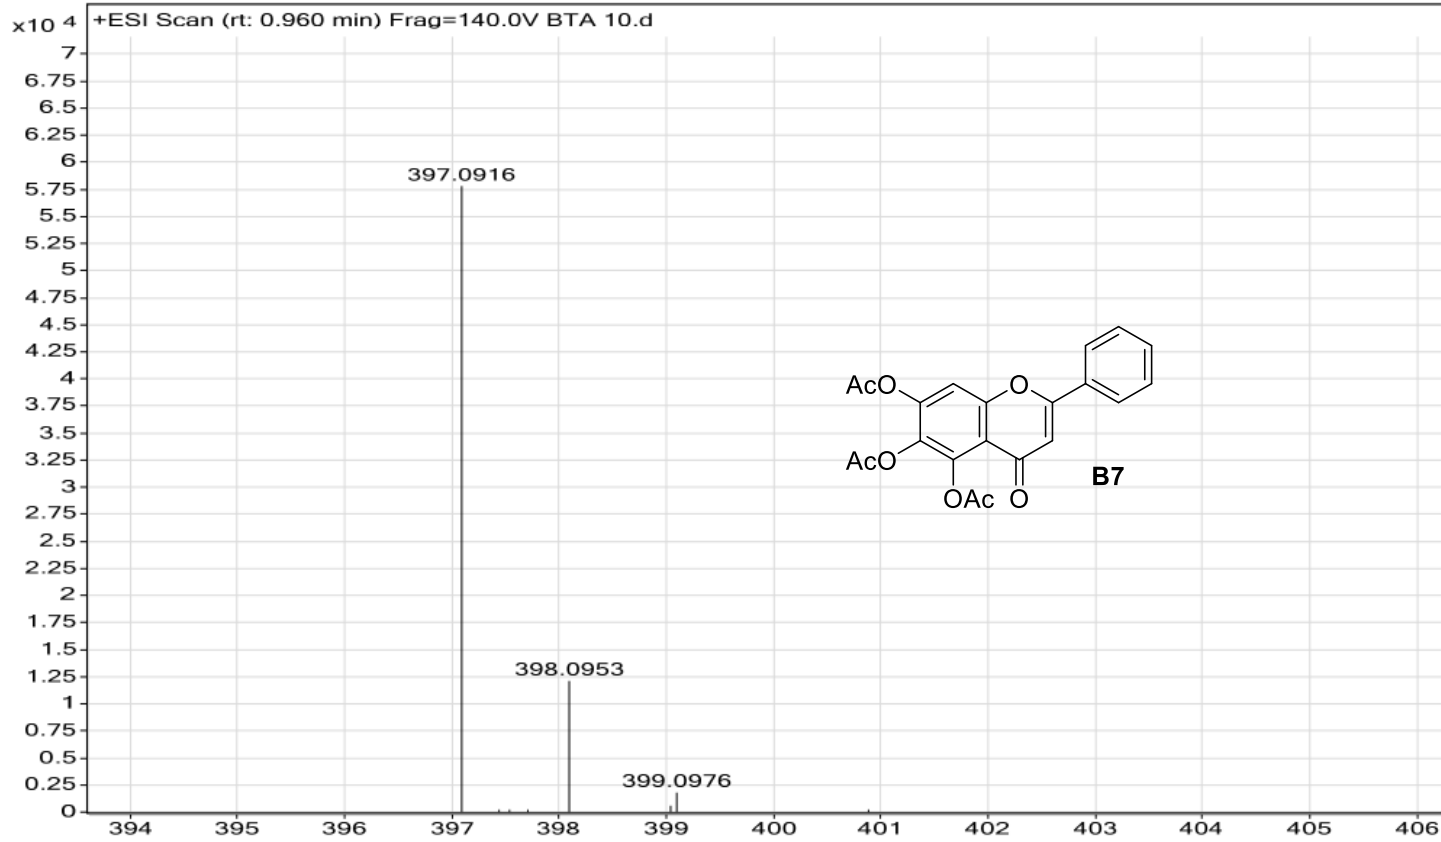

# <sup>1</sup>H-NMR

BTA-DMSO-1H

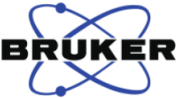

8.092  
8.090  
8.087  
8.080  
8.076  
8.073  
7.829  
7.624  
7.619  
7.613  
7.610  
7.607  
7.601  
7.586  
7.576  
7.572  
7.569  
6.938

3.296  
2.507  
2.504  
2.500  
2.497  
2.493  
2.372  
2.368  
2.355

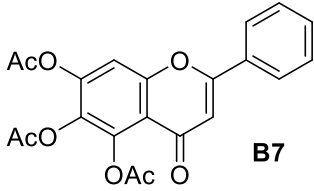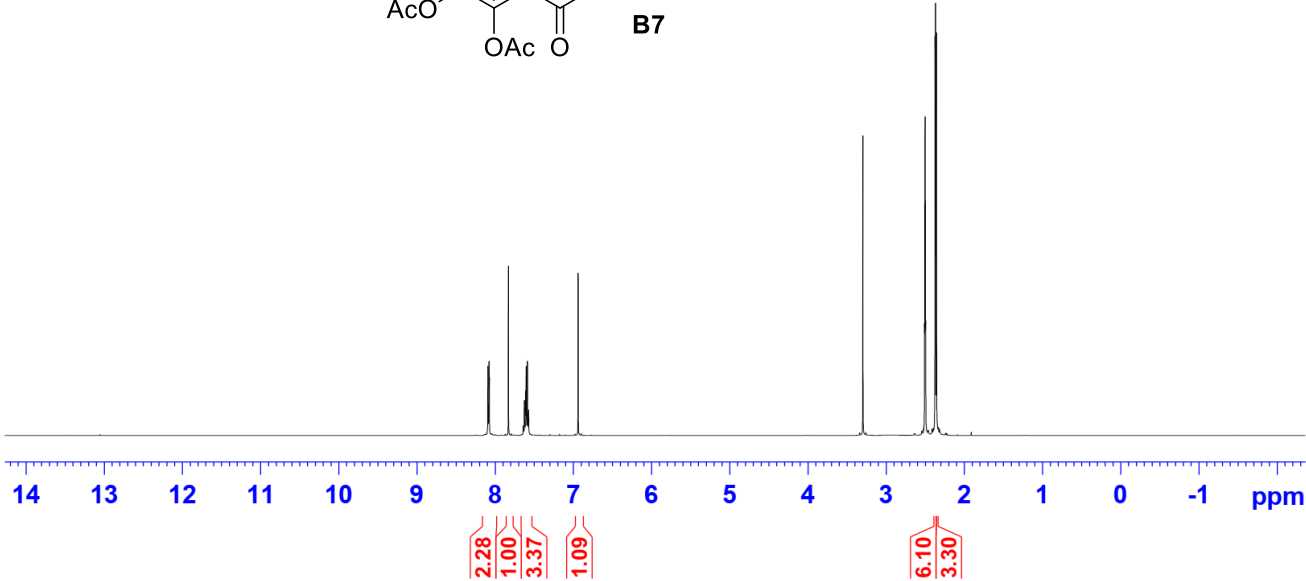

Current Data Parameters  
NAME 113HUAN\_BTA  
EXPNO 10  
PROCNO 1

F2 - Acquisition Parameters  
Date\_ 20191008  
Time\_ 12.03  
INSTRUM spect  
PROBHD 5 mm PABBO BB/  
PULPROG zg30  
TD 65536  
SOLVENT DMSO  
NS 16  
DS 2  
SWH 10000.000 Hz  
FIDRES 0.152588 Hz  
AQ 3.2767999 sec  
RG 127.68  
DW 50.000 usec  
DE 6.50 usec  
TE 304.7 K  
D1 1.00000000 sec  
TDO 1

==== CHANNEL f1 =====  
SF01 500.1920889 MHz  
NUC1 1H  
P1 10.20 usec  
PLW1 22.00000000 W

F2 - Processing parameters  
SI 65536  
SF 500.1890048 MHz  
WDW EM  
SSB 0  
LB 0.30 Hz  
GB 0  
PC 1.00

# <sup>1</sup>H-NMR

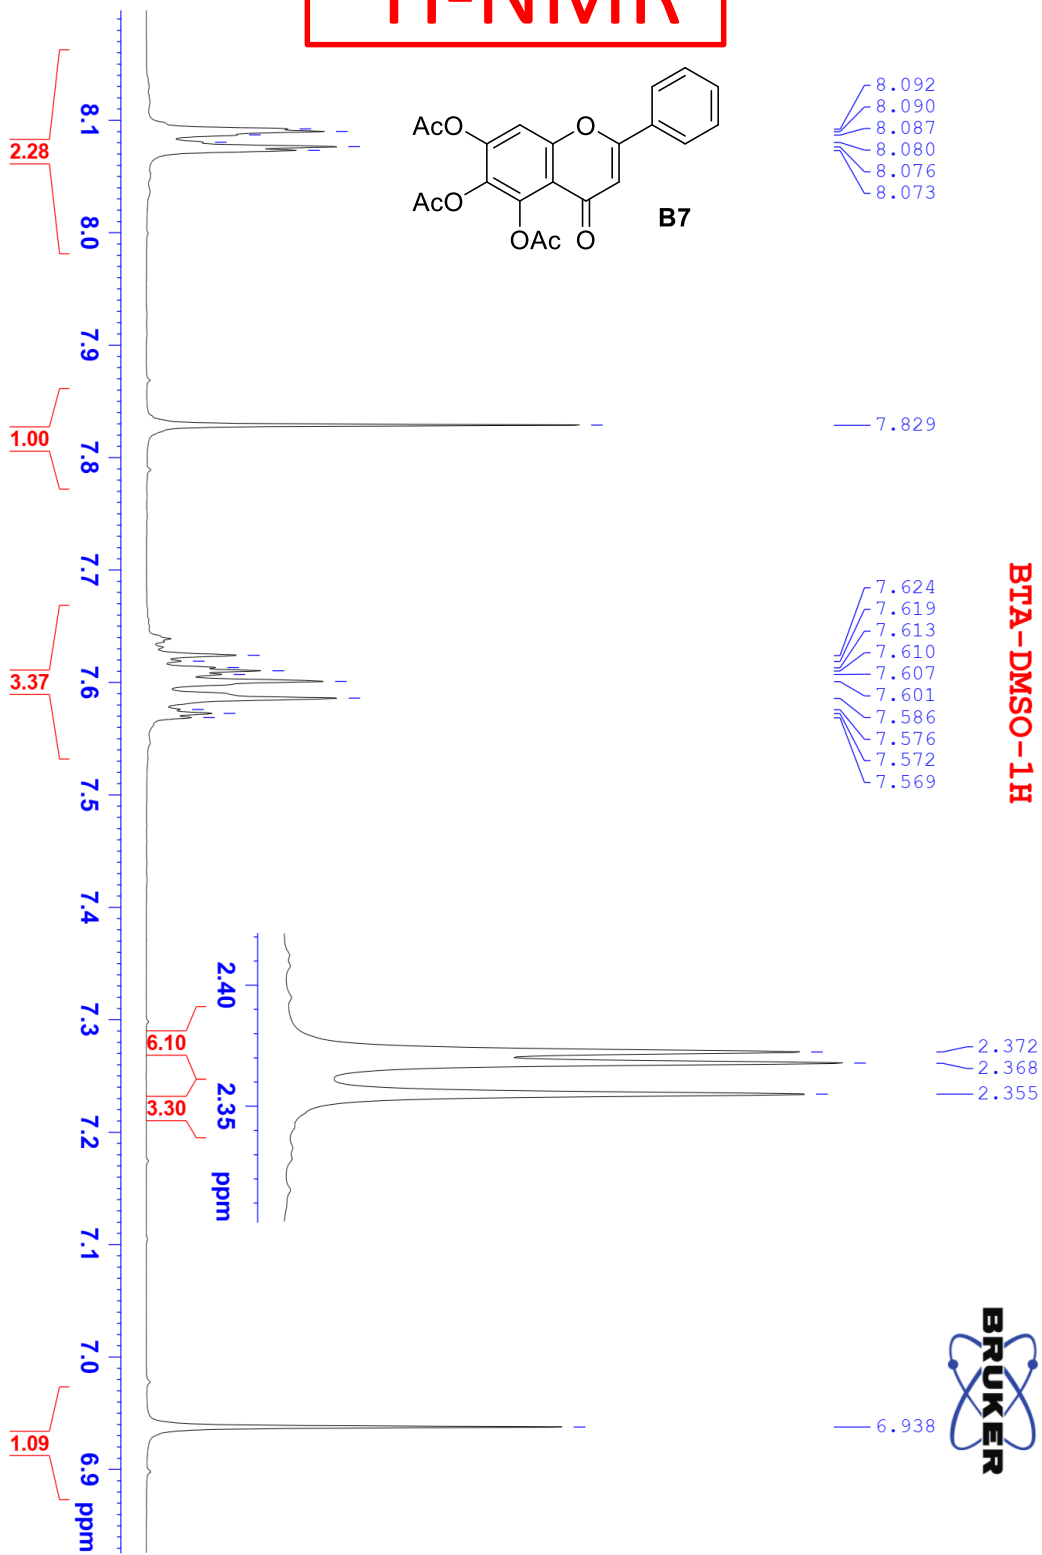

# $^{13}\text{C}$ -NMR

BTA-DMSO-C13CPD

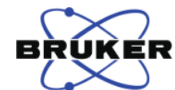

175.28  
167.79  
167.47  
167.44  
162.00  
153.56  
146.71  
141.18  
132.57  
131.98  
130.39  
129.06  
126.35  
115.05  
111.10  
107.53

40.00  
39.83  
39.66  
39.50  
39.33  
39.16  
39.00  
20.44  
20.33  
19.69

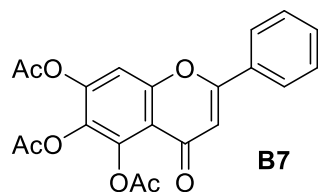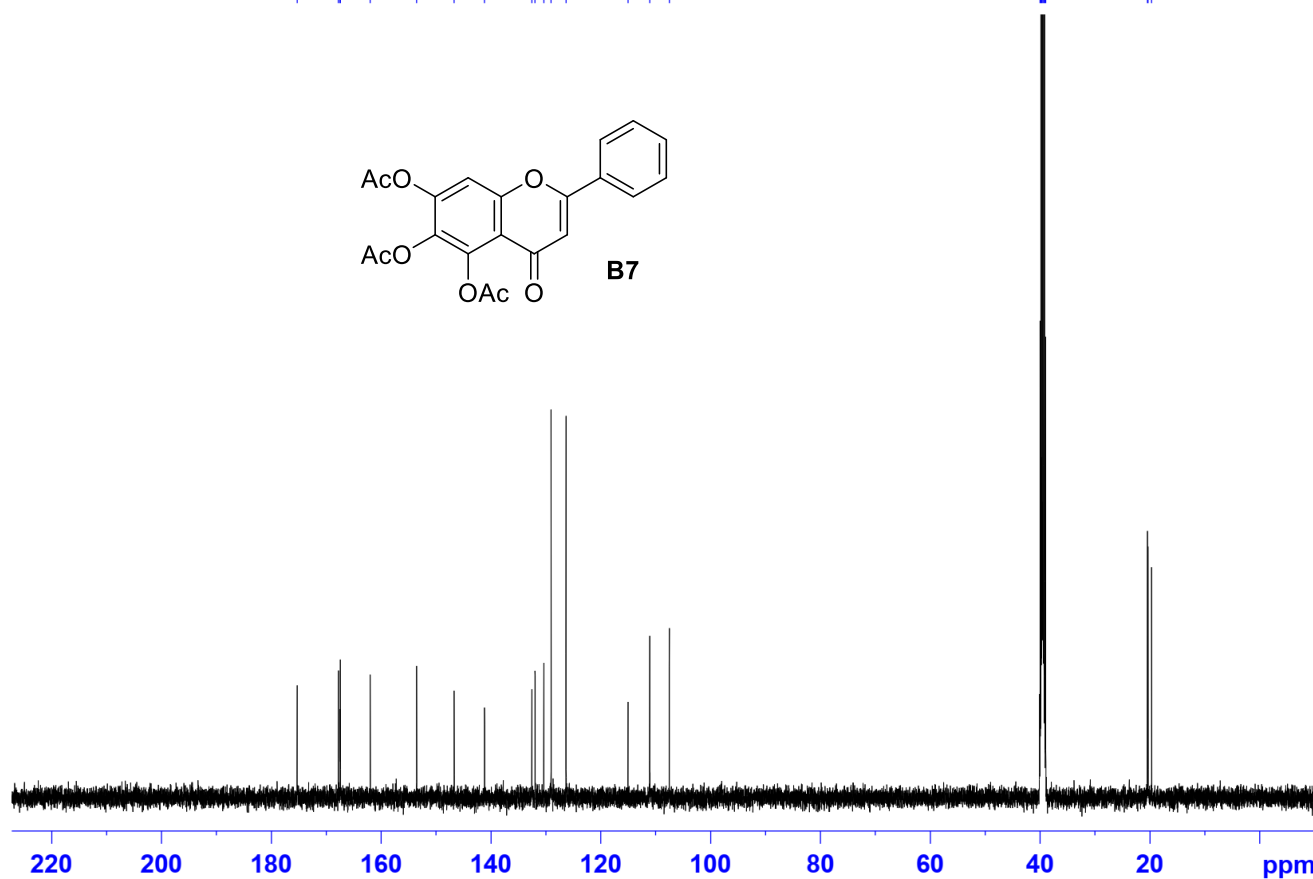

Current Data Parameters  
NAME 113HUAN\_BTA  
EXPNO 2  
PROCNO 1

F2 - Acquisition Parameters  
Date\_ 20191008  
Time\_ 16.14  
INSTRUM spect  
PROBHD 5 mm PABBO BB/  
PULPROG zgpg30  
TD 65536  
SOLVENT DMSO  
NS 256  
DS 4  
SWH 31250.000 Hz  
FIDRES 0.476837 Hz  
AQ 1.0485760 sec  
RG 198.57  
DW 16.000 usec  
DE 6.50 usec  
TE 304.3 K  
D1 2.00000000 sec  
D11 0.03000000 sec  
TDO 1

=====  
CHANNEL f1  
SFO1 125.7864591 MHz  
NUC1 13C  
P1 10.00 usec  
PLW1 88.00000000 W

=====  
CHANNEL f2  
SFO2 500.1910008 MHz  
NUC2 1H  
CPDPRG[2] waltz16  
PCPD2 80.00 usec  
PLW2 22.00000000 W  
PLW12 0.35764000 W  
PLW13 0.17989001 W

F2 - Processing parameters  
SI 32768  
SF 125.7726931 MHz  
WDW EM  
SSB 0  
LB 1.00 Hz  
GB 0  
PC 1.40



# $^{13}\text{C}$ -NMR

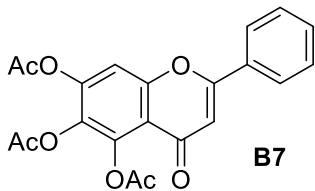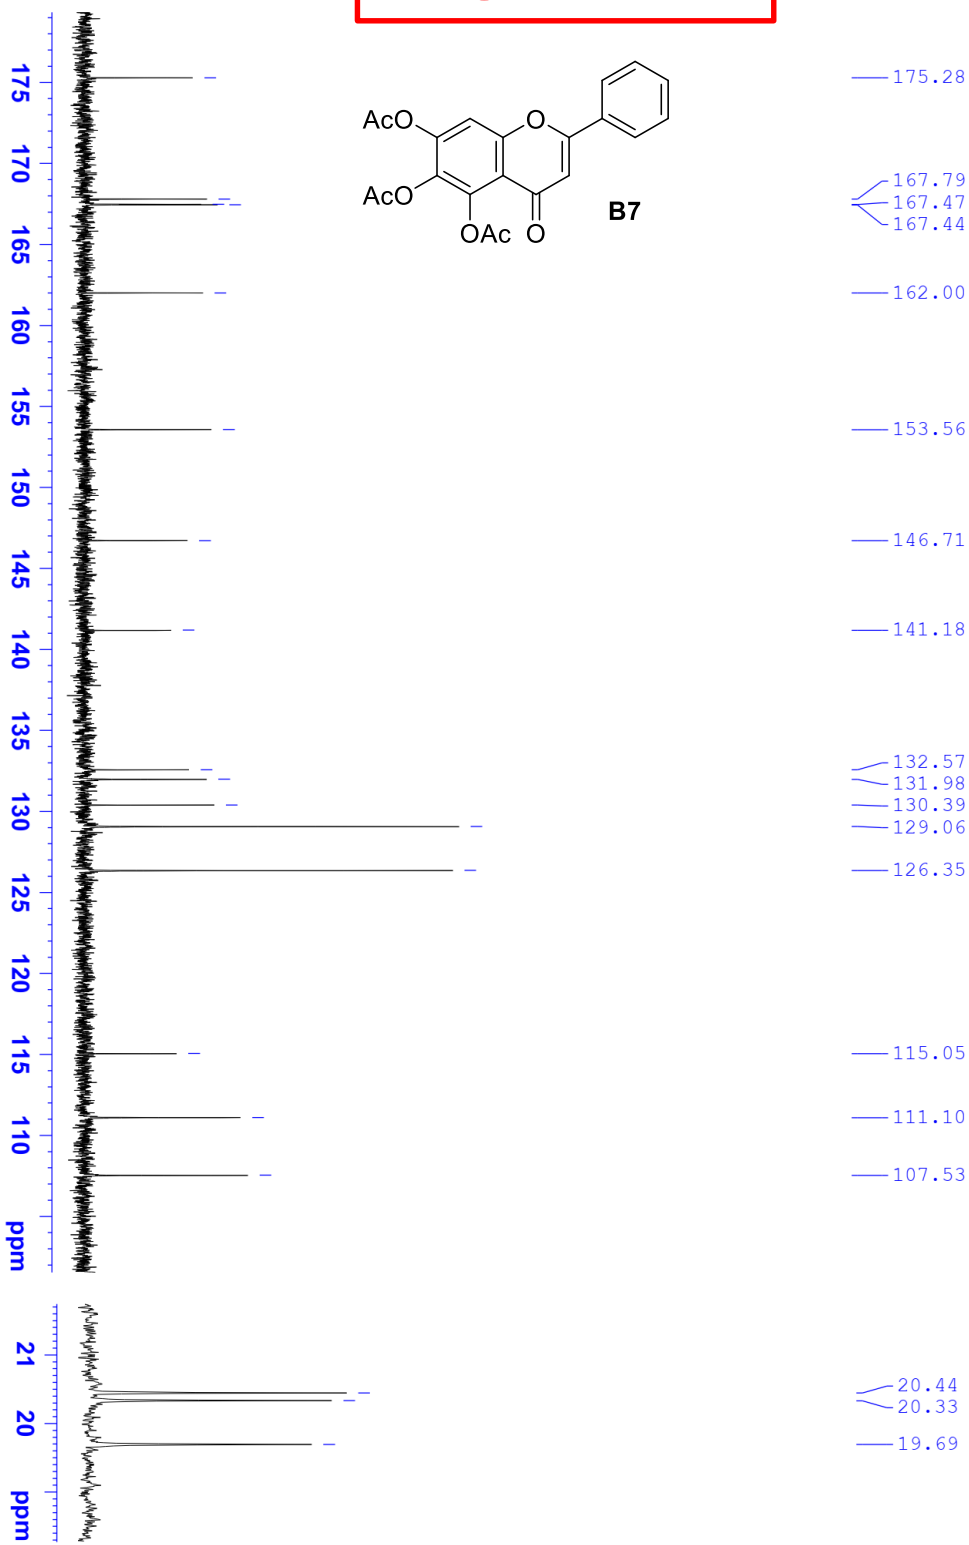

**BTA-DMSO-C13CPD**

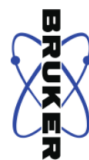

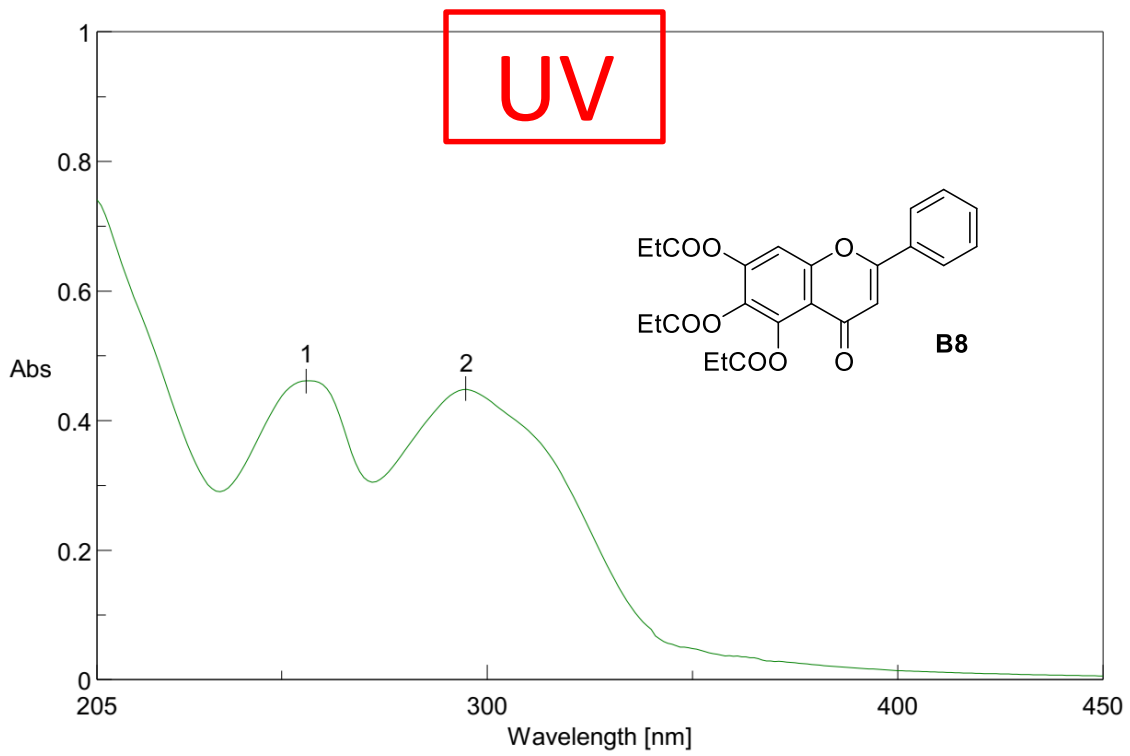

[ Result of Peak Picking ]

| No. | Position | Intensity | No. | Position | Intensity |
|-----|----------|-----------|-----|----------|-----------|
| 1   | 256      | 0.461275  | 2   | 295      | 0.447673  |

SHIMADZU

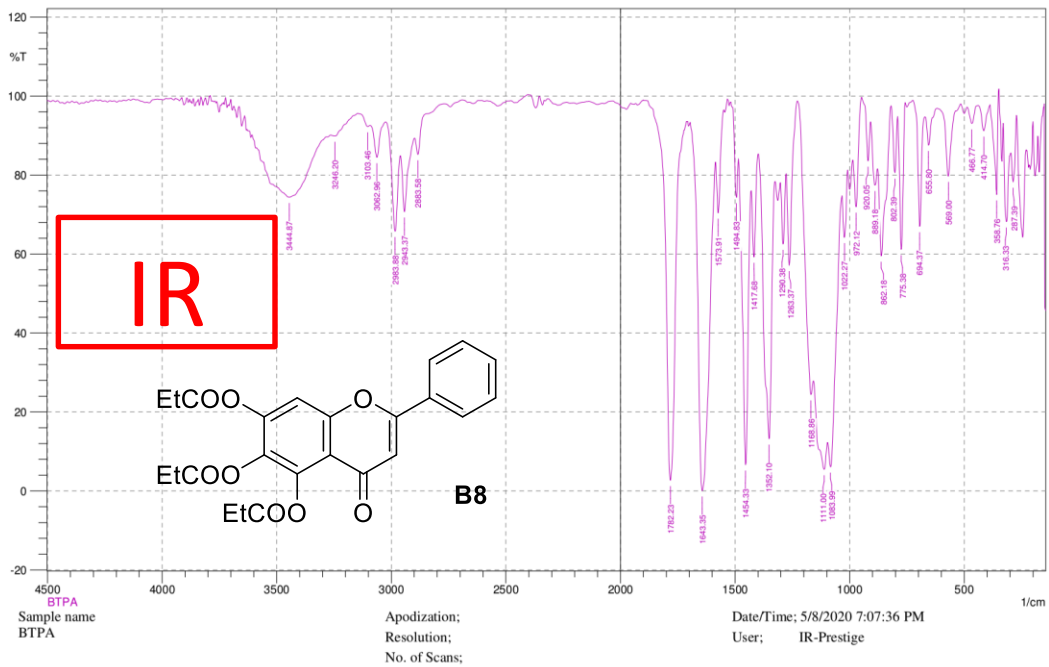

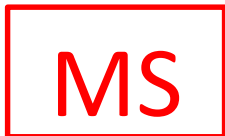

## Qualitative Analysis Report

**Data Filename** BTPA-11.d **Sample Name** BTPA-11  
**Sample Type** Sample **Position** P2-B6  
**Instrument Name** Instrument 1 **User Name**  
**Acq Method** Cot ngan - MSMS\_Pos.m **Acquired Time** 04/08/2020 7:39:54 PM  
**IRM Calibration Status** Success **DA Method** COTNGAN.M.m  
**Comment**  
**Sample Group** **Info.**  
**Stream Name** LC 1 **Acquisition SW** 6200 series TOF/6500 series  
**Version** Q-TOF B.06.01 (B6172 SP1)

### User Chromatograms

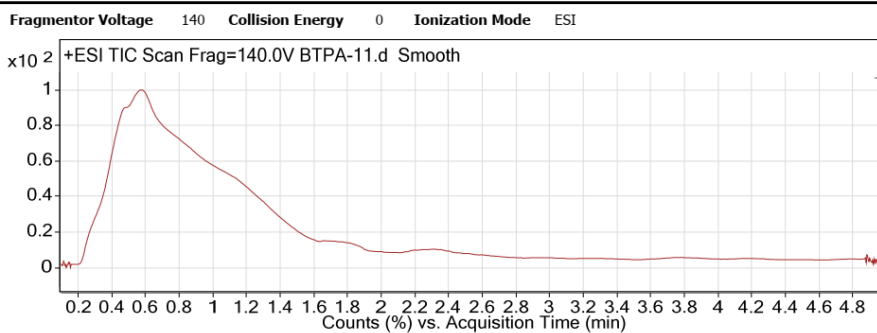

### User Spectra

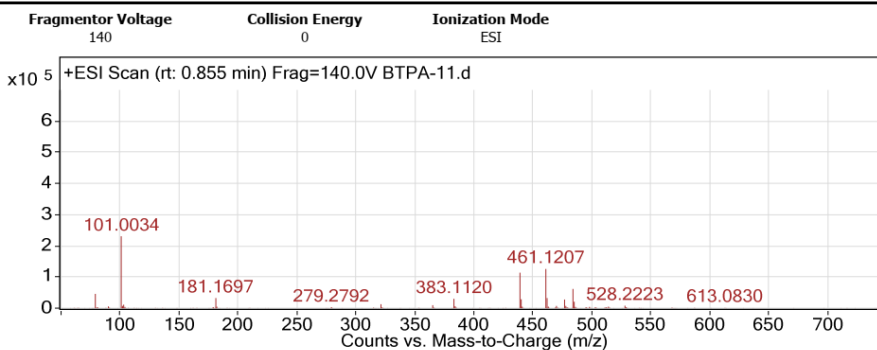

### Peak List

| m/z      | z | Abund     |
|----------|---|-----------|
| 101.0034 | 1 | 230474.77 |
| 439.1384 | 1 | 113750.94 |
| 461.1207 | 1 | 126043.83 |
| 484.1962 | 1 | 61900.38  |
| 899.2526 | 1 | 602931.81 |
| 900.2562 | 1 | 308889.25 |
| 901.258  | 1 | 98654.03  |
| 915.2266 | 1 | 269624.84 |
| 916.2292 | 1 | 142459.03 |
| 917.2297 | 1 | 56441.81  |

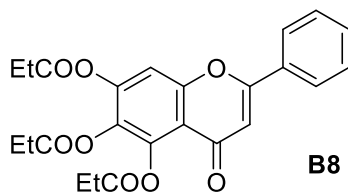

--- End Of Report ---

# MS

|               |           |             |                      |                 |              |                        |                       |
|---------------|-----------|-------------|----------------------|-----------------|--------------|------------------------|-----------------------|
| Sample Name   | BTPA-11   | Position    | P2-B6                | Instrument Name | Instrument 1 | User Name              |                       |
| Inj Vol       | 2         | InjPosition |                      | SampleType      | Sample       | IRM Calibration Status | Success               |
| Data Filename | BTPA-11.d | ACQ Method  | Cot ngan - MSMS_Pos. | Comment         |              | Acquired Time          | 04/08/2020 7:39:54 PM |

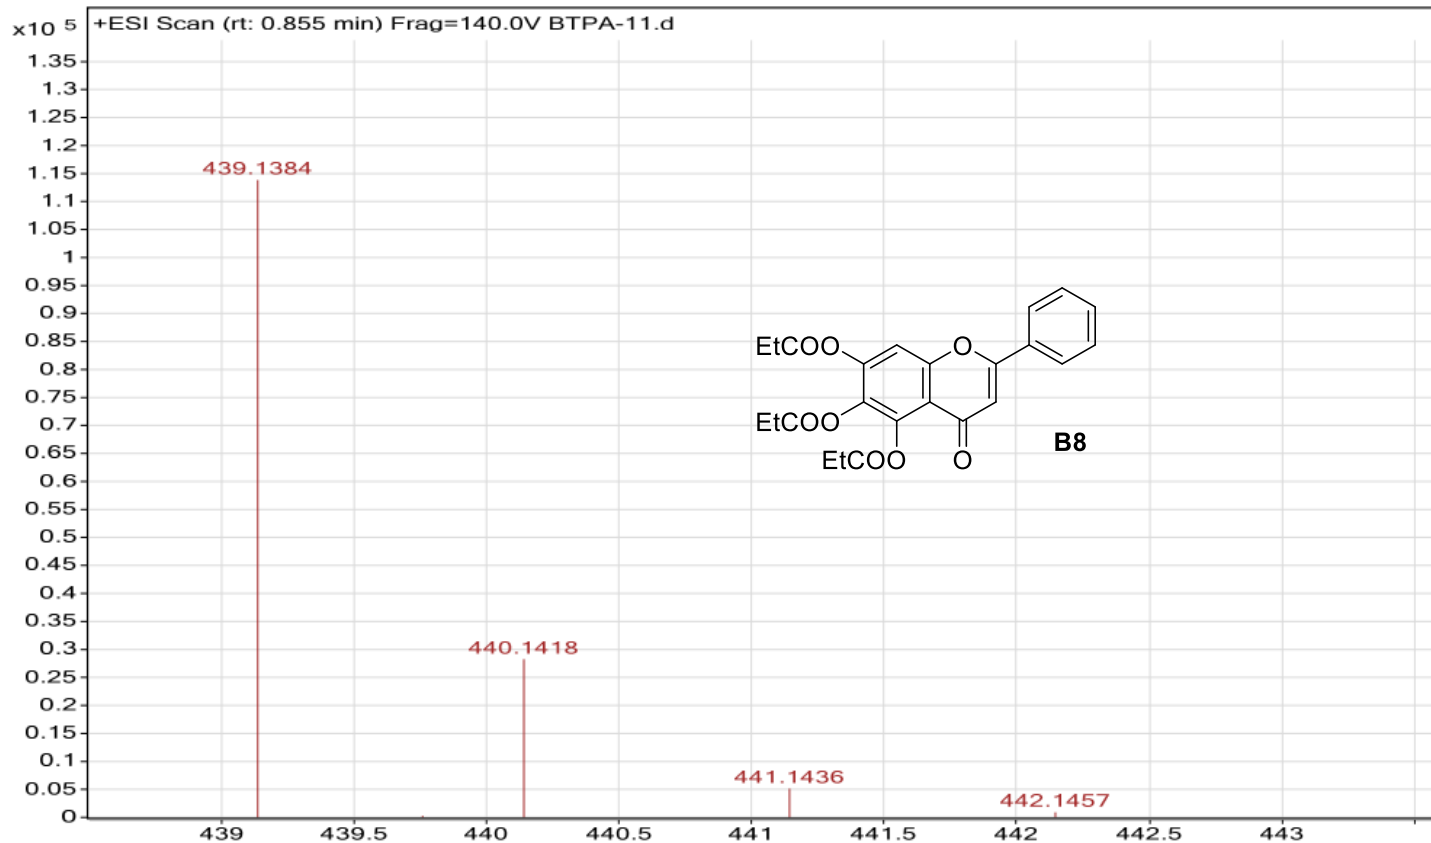

# <sup>1</sup>H-NMR

BTPA-DMSO-1H

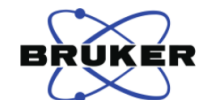

8.085  
8.083  
8.070  
8.066  
7.826  
7.618  
7.607  
7.604  
7.601  
7.596  
7.581  
7.567  
6.934  
3.317  
2.702  
2.697  
2.687  
2.682  
2.675  
2.673  
2.667  
2.660  
2.652  
2.645  
2.507  
2.503  
2.500  
2.496  
2.493  
1.193  
1.178  
1.175  
1.163  
1.160  
1.159  
1.145  
1.144

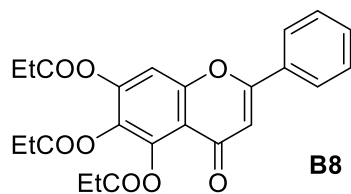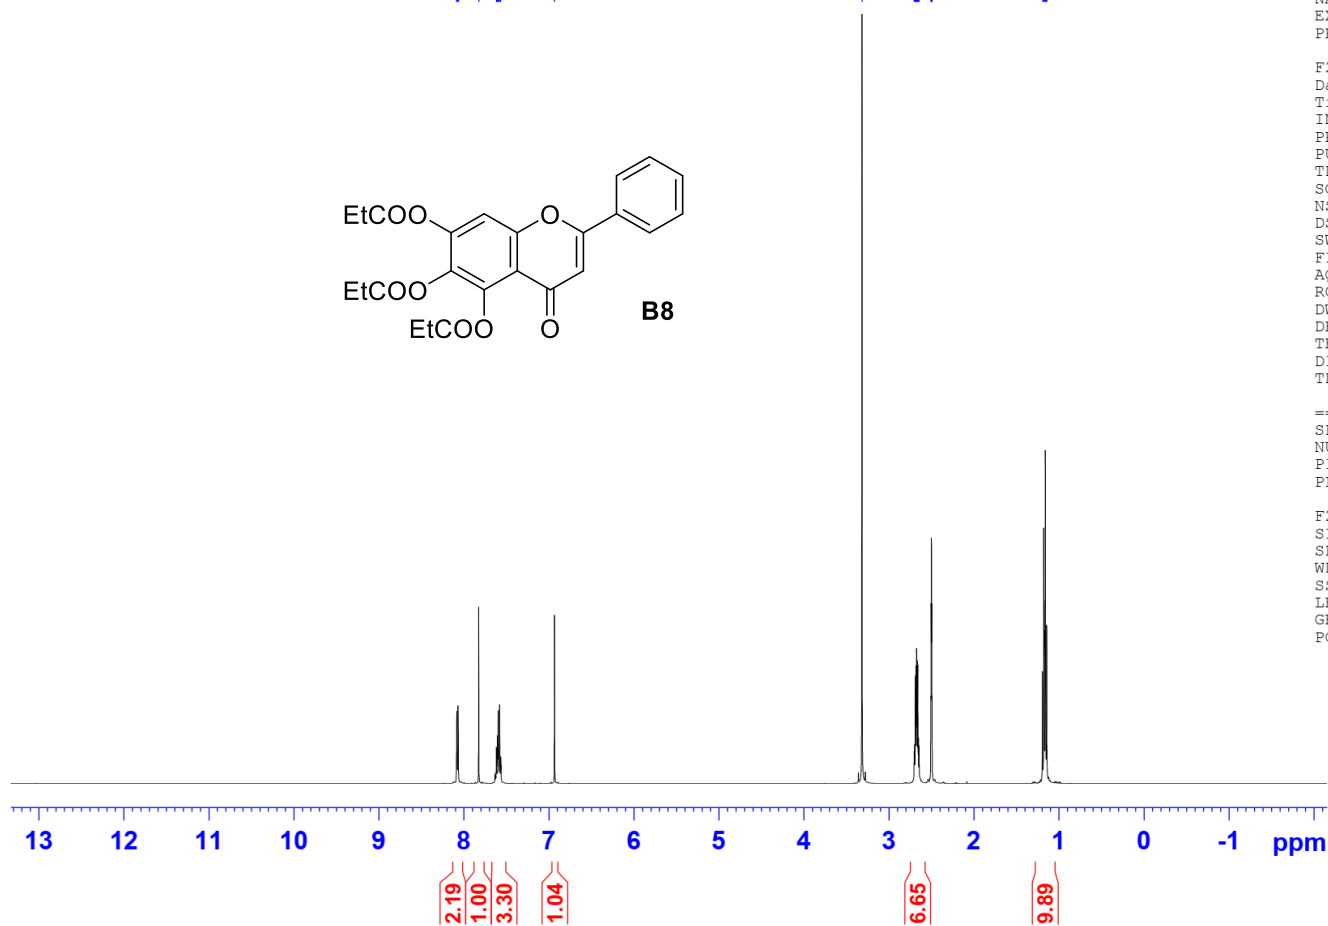

Current Data Parameters  
NAME 110HUAN\_BTPA  
EXPNO 10  
PROCNO 1

F2 - Acquisition Parameters  
Date\_ 20200109  
Time\_ 14.49  
INSTRUM spect  
PROBHD 5 mm PABBO BB/  
PULPROG zg30  
TD 65536  
SOLVENT DMSO  
NS 16  
DS 2  
SWH 10000.000 Hz  
FIDRES 0.152588 Hz  
AQ 3.2767999 sec  
RG 89.63  
DW 50.000 usec  
DE 6.50 usec  
TE 303.0 K  
D1 1.00000000 sec  
TDO 1

===== CHANNEL f1 =====  
SFO1 500.1920889 MHz  
NUC1 1H  
P1 10.20 usec  
PLW1 22.00000000 W

F2 - Processing parameters  
SI 65536  
SF 500.1890047 MHz  
WDW EM  
SSB 0  
LB 0.30 Hz  
GB 0  
PC 1.00

# <sup>1</sup>H-NMR

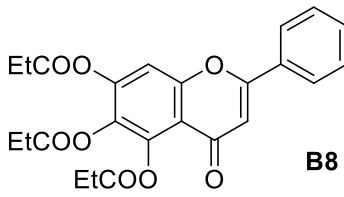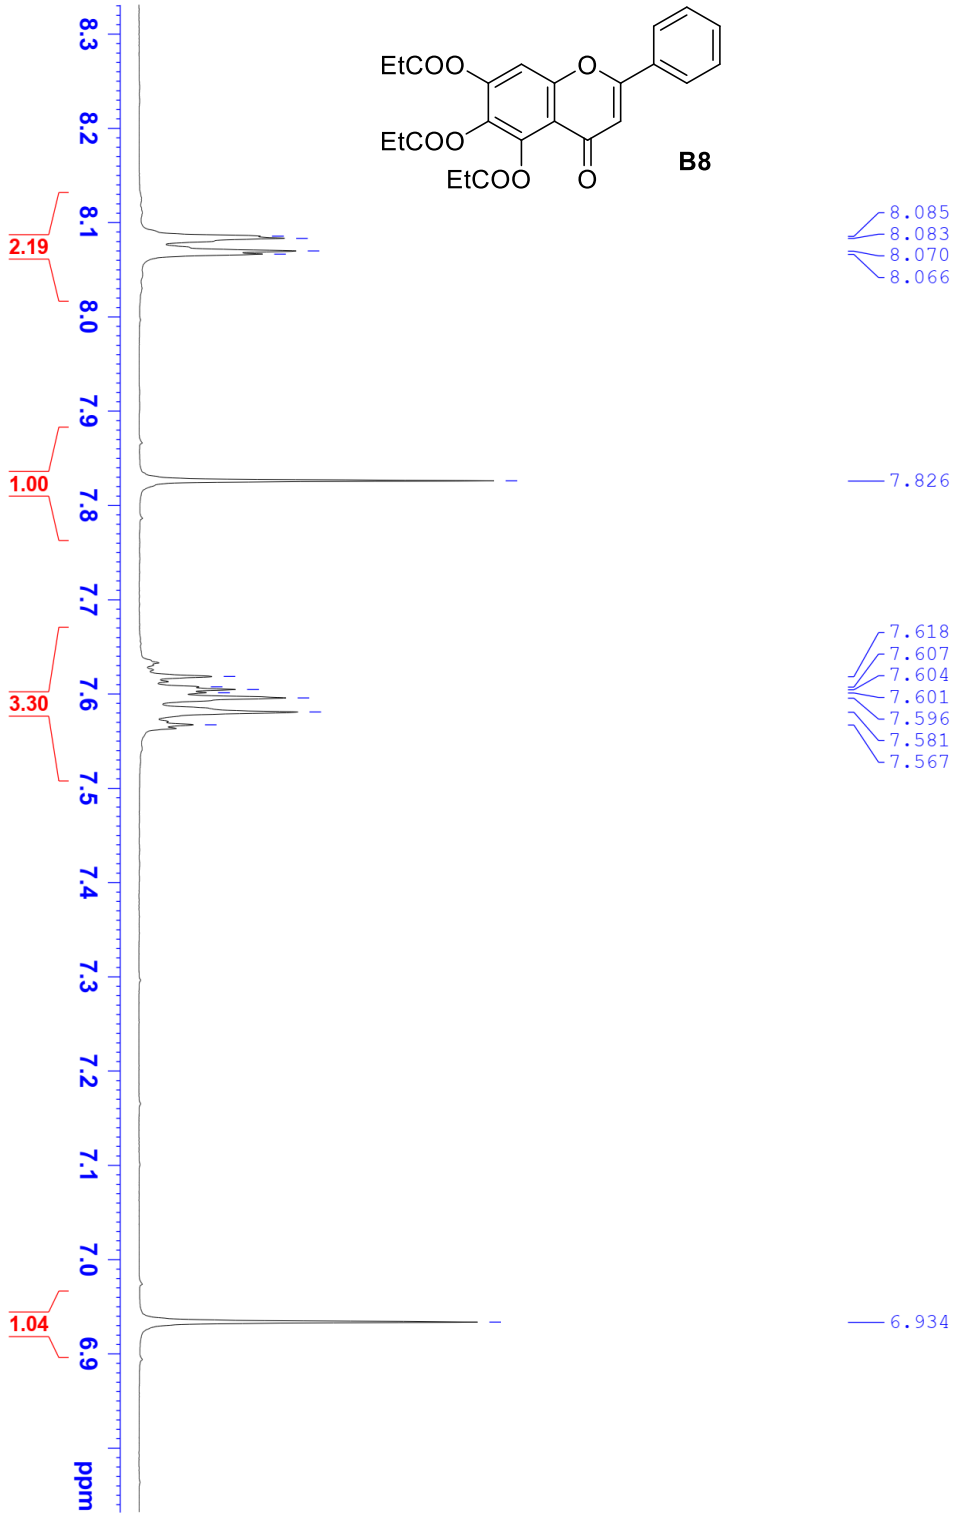

**DMSO-d<sub>6</sub>**

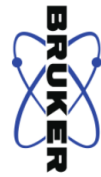

# <sup>1</sup>H-NMR

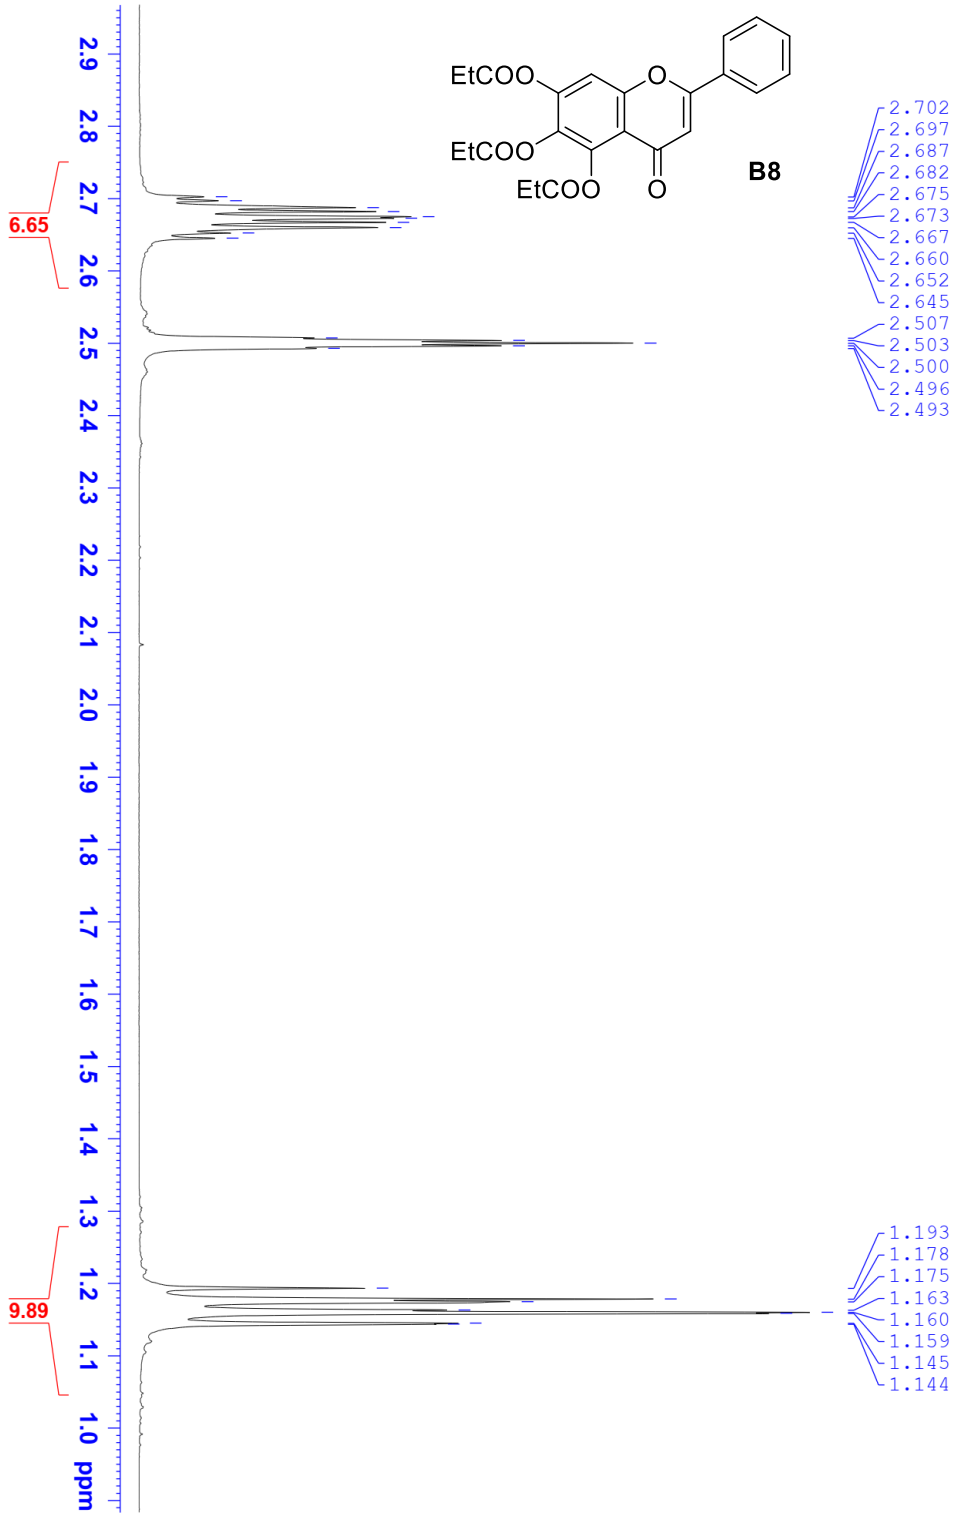

# $^{13}\text{C}$ -NMR

BTPA-DMSO-C13CPD



175.31  
171.03  
170.81  
170.72  
161.99  
153.56  
146.78  
141.24  
132.53  
131.98  
130.43  
129.08  
126.34  
115.08  
111.01  
107.54

40.09  
40.00  
39.83  
39.67  
39.50  
39.33  
39.17  
39.00  
26.72  
26.68  
26.20  
8.97  
8.71  
8.62

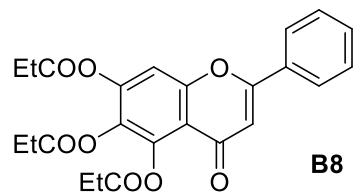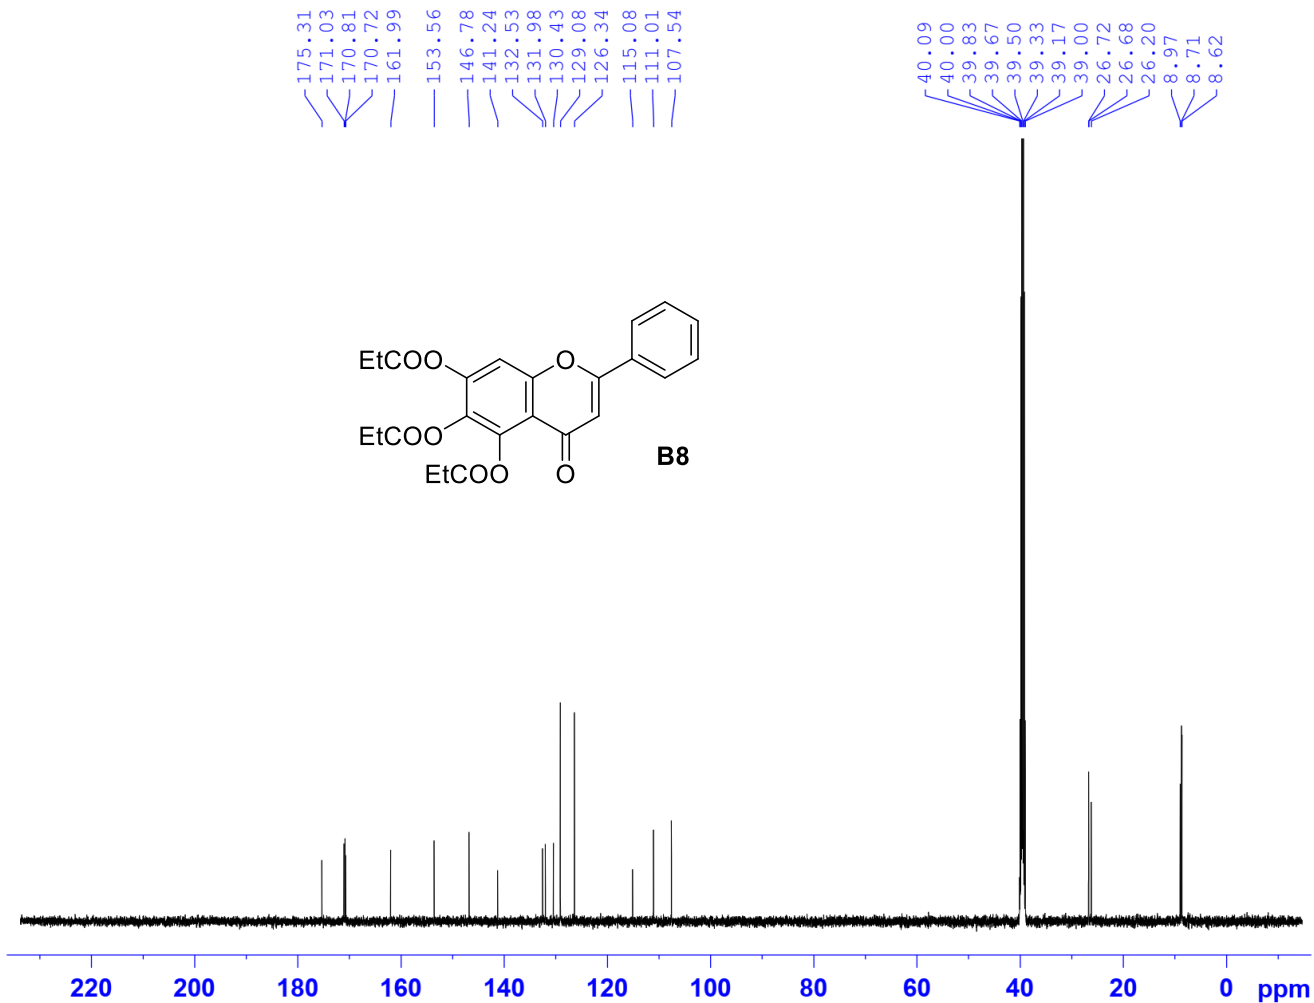

Current Data Parameters  
NAME 110HUAN\_BTFA  
EXPNO 2  
PROCNO 1

F2 - Acquisition Parameters  
Date\_ 20200109  
Time 17.18  
INSTRUM spect  
PROBHD 5 mm PABBO BB/  
PULPROG zgpg30  
TD 65536  
SOLVENT DMSO  
NS 256  
DS 4  
SWH 31250.000 Hz  
FIDRES 0.476837 Hz  
AQ 1.0485760 sec  
RG 198.57  
DW 16.000 usec  
DE 6.50 usec  
TE 303.4 K  
D1 2.00000000 sec  
D11 0.03000000 sec  
TD0 1

==== CHANNEL f1 =====  
SFO1 125.7864591 MHz  
NUC1 13C  
P1 10.00 usec  
PLW1 88.00000000 W

==== CHANNEL f2 =====  
SFO2 500.1910008 MHz  
NUC2 1H  
CPDPRG[2] waltz16  
PCPD2 80.00 usec  
PLW2 22.00000000 W  
PLW12 0.35764000 W  
PLW13 0.17989001 W

F2 - Processing parameters  
SI 32768  
SF 125.7726903 MHz  
WDW EM  
SSB 0  
LB 1.00 Hz  
GB 0  
PC 1.40



# $^{13}\text{C}$ -NMR

BTPA-DMSO-C13CPD

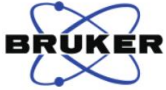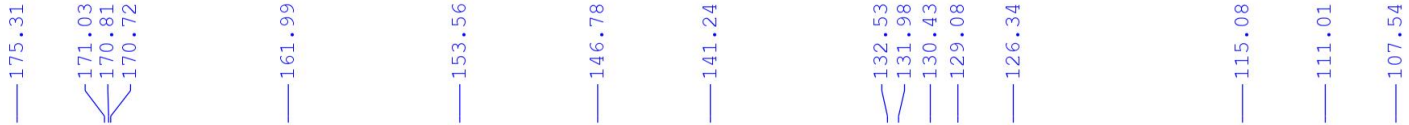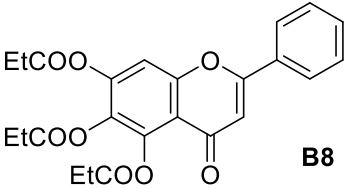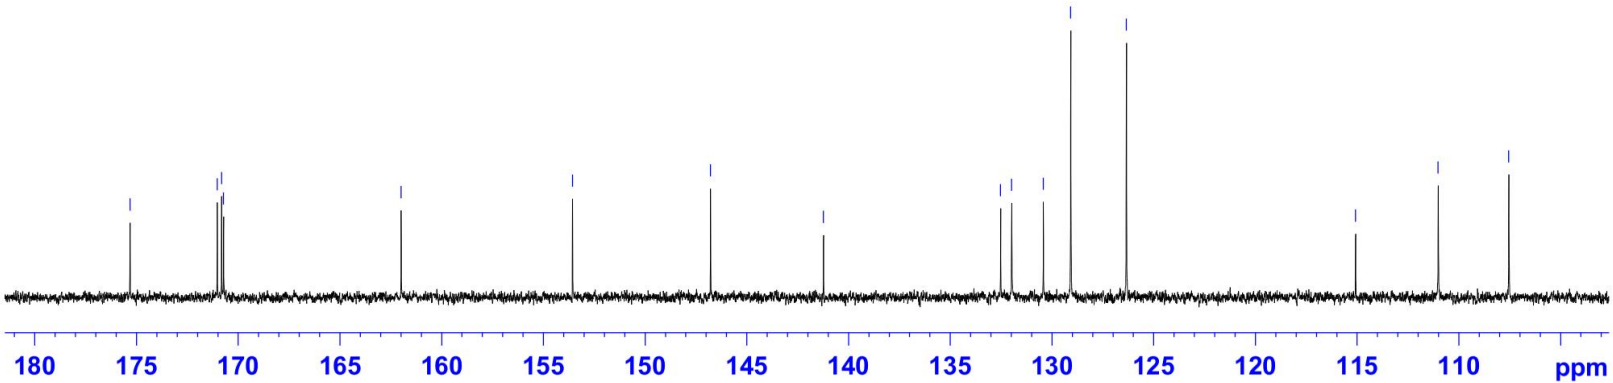

# $^{13}\text{C}$ -NMR

BTPA-DMSO-C13CPD

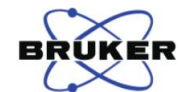

26.72  
26.68  
26.20

8.97  
8.71  
8.62

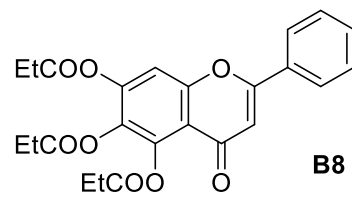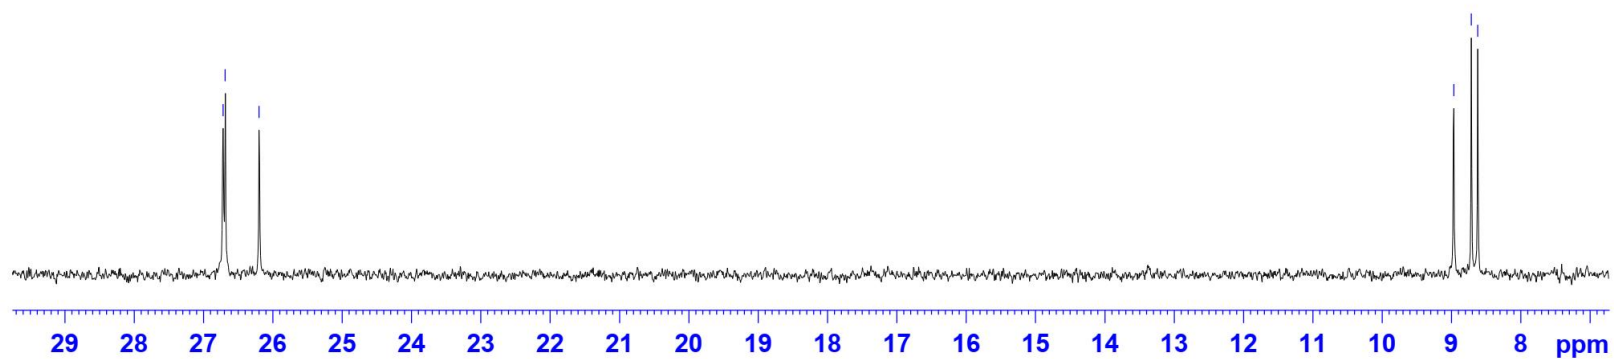

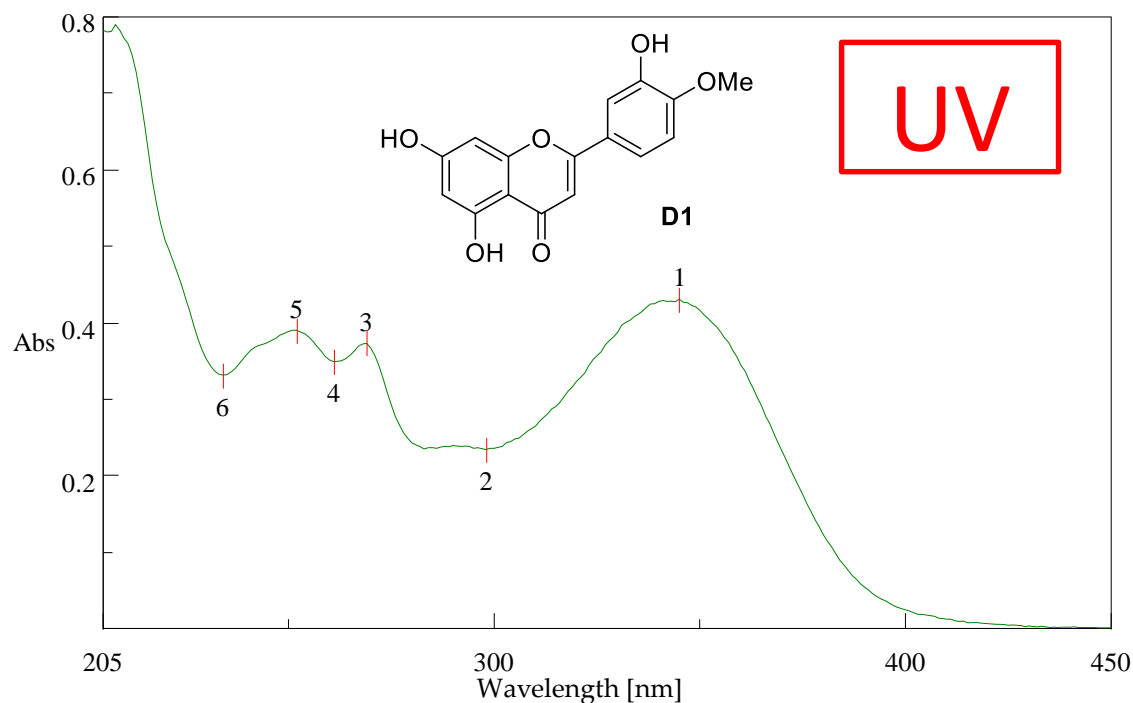

[ Result of Peak Picking ]

| No. | Position | Intensity | No. | Position | Intensity | No. | Position | Intensity |
|-----|----------|-----------|-----|----------|-----------|-----|----------|-----------|
| 1   | 345      | 0.43004   | 2   | 298      | 0.233573  | 3   | 269      | 0.372553  |
| 4   | 261      | 0.348546  | 5   | 252      | 0.389723  | 6   | 234      | 0.330926  |

VIEN CONG NGHE HOA HOC  
01 Mac Dinh Chi - Q.1 - Tp HCM

Tel: 08.38296127  
Fax: 08.38293889

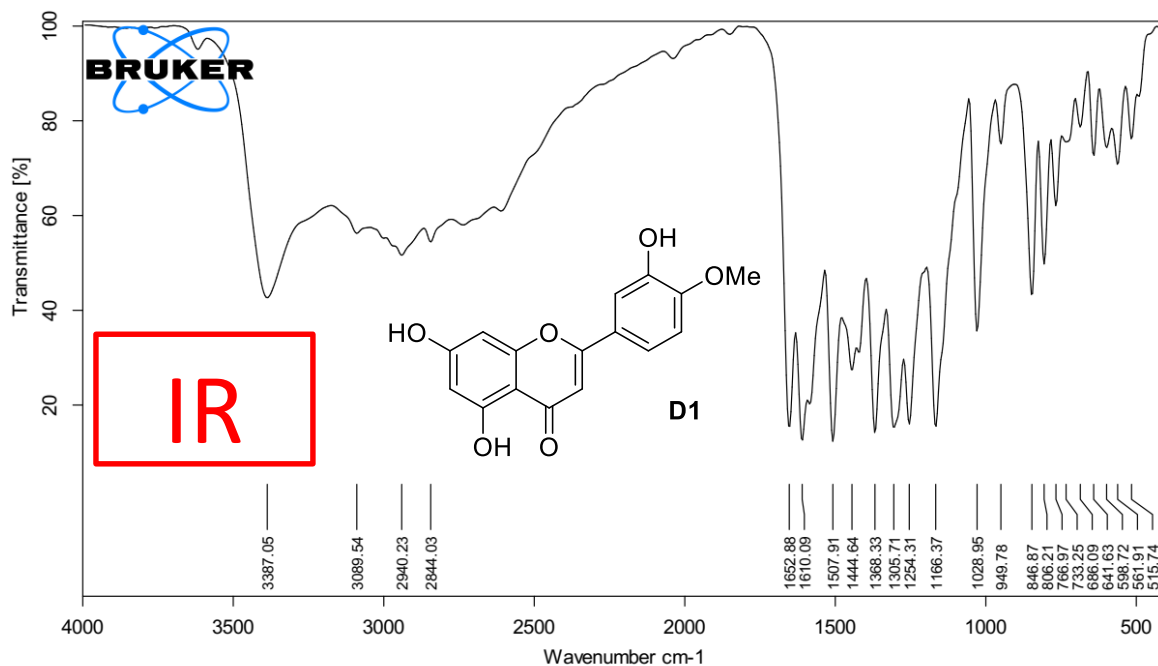

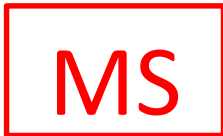

## Qualitative Analysis Report

**Data Filename** 1-DT.d **Sample Name** 1-DT  
**Sample Type** Sample **Position** P2-C6  
**Instrument Name** Instrument 1 **User Name**  
**Acq Method** Cot ngan - MSMS\_Pos.m **Acquired Time** 04/08/2020 8:29:59 PM  
**IRM Calibration Status** Success **DA Method** COTNGAN.M.m  
**Comment**  
**Sample Group** **Info.**  
**Stream Name** LC 1 **Acquisition SW** 6200 series TOF/6500 series  
**Version** Q-TOF B.06.01 (B6172 SP1)

### User Chromatograms

Fragmentor Voltage 140 Collision Energy 0 Ionization Mode ESI

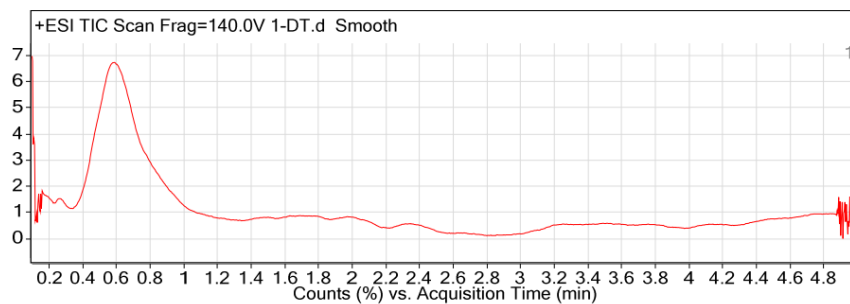

### User Spectra

Fragmentor Voltage 140 Collision Energy 0 Ionization Mode ESI

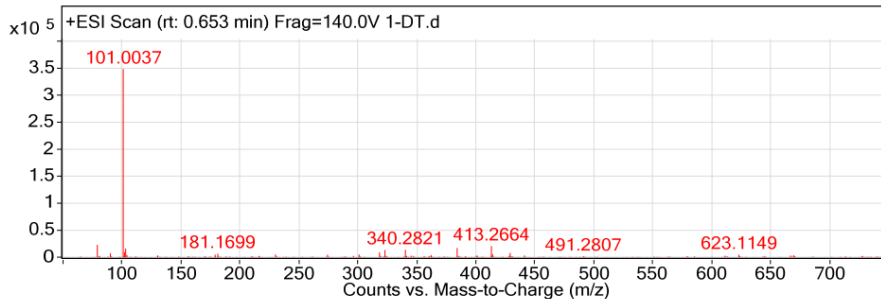

### Peak List

| m/z      | z | Abund     |
|----------|---|-----------|
| 79.0214  | 1 | 22762.52  |
| 101.0037 | 1 | 348713.09 |
| 102.0062 | 1 | 9852.9    |
| 102.9991 | 1 | 16236.17  |
| 318.3002 | 1 | 9053.3    |
| 323.0526 | 1 | 13376.74  |
| 340.2821 | 1 | 13906.29  |
| 384.3083 | 1 | 16981.61  |
| 413.2664 | 1 | 20418.92  |
| 429.2402 | 1 | 7832.86   |

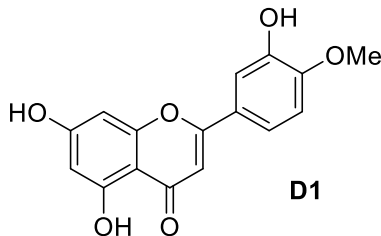

--- End Of Report ---

# MS

|               |        |             |                      |                 |              |                        |                       |
|---------------|--------|-------------|----------------------|-----------------|--------------|------------------------|-----------------------|
| Sample Name   | 1-DT   | Position    | P2-C6                | Instrument Name | Instrument 1 | User Name              |                       |
| Inj Vol       | 2      | InjPosition |                      | SampleType      | Sample       | IRM Calibration Status | Success               |
| Data Filename | 1-DT.d | ACQ Method  | Cot ngan - MSMS_Pos. | Comment         |              | Acquired Time          | 04/08/2020 8:29:59 PM |

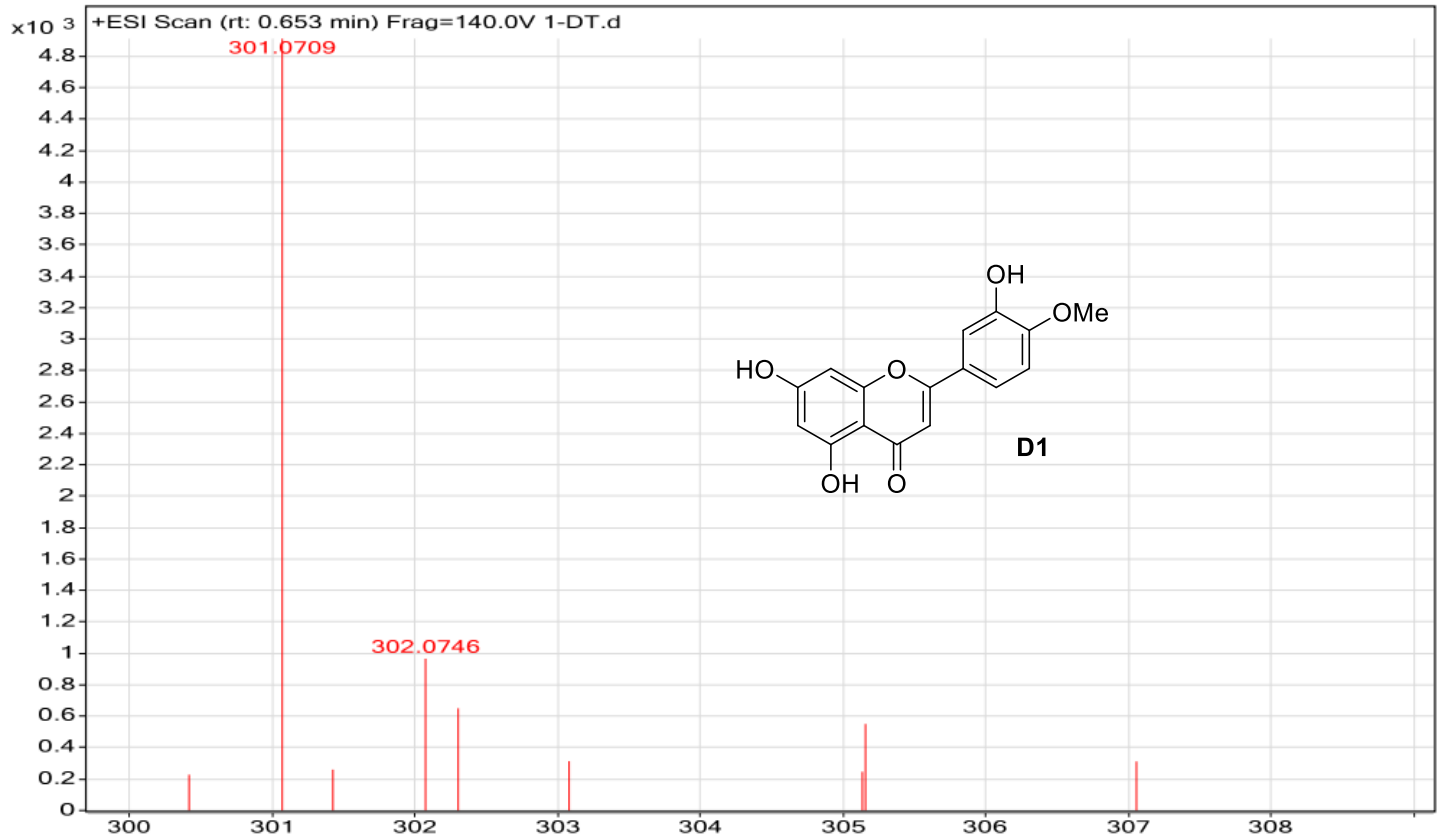

# <sup>1</sup>H-NMR

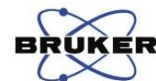

DT-DMSO-1H

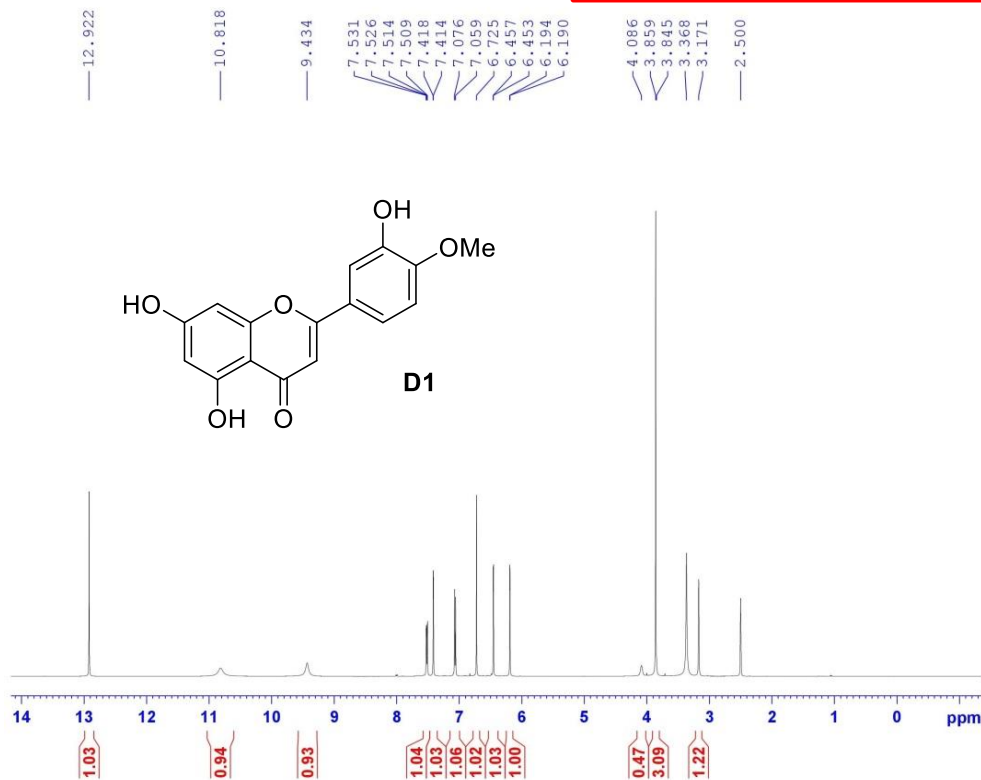

Current Data Parameters  
NAME 110HUAN\_H01  
EXPNO 1  
PROCNO 1

F2 - Acquisition Parameters  
Date\_ 20190129  
Time 19:55  
INSTRUM spect  
PROBHD 5 mm PABBO BB/  
PULPROG zg30  
TD 65536  
SOLVENT DMSO  
NS 16  
DS 2  
SWH 10000.000 Hz  
FIDRES 0.152588 Hz  
AQ 3.2767999 sec  
RG 89.63  
DW 50.000 usec  
DE 6.50 usec  
TE 301.5 K  
D1 1.00000000 sec  
TDO 1

===== CHANNEL f1 =====  
SFO1 500.2030889 MHz  
NUC1 1H  
PI 19.00 usec  
PLW1 22.00000000 W

F2 - Processing parameters  
SI 65536  
SF 500.2000042 MHz  
WFW EM  
SGB 0  
LB 0.30 Hz  
GB 0  
PC 1.00

DT-DMSO-1H

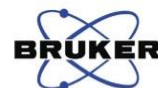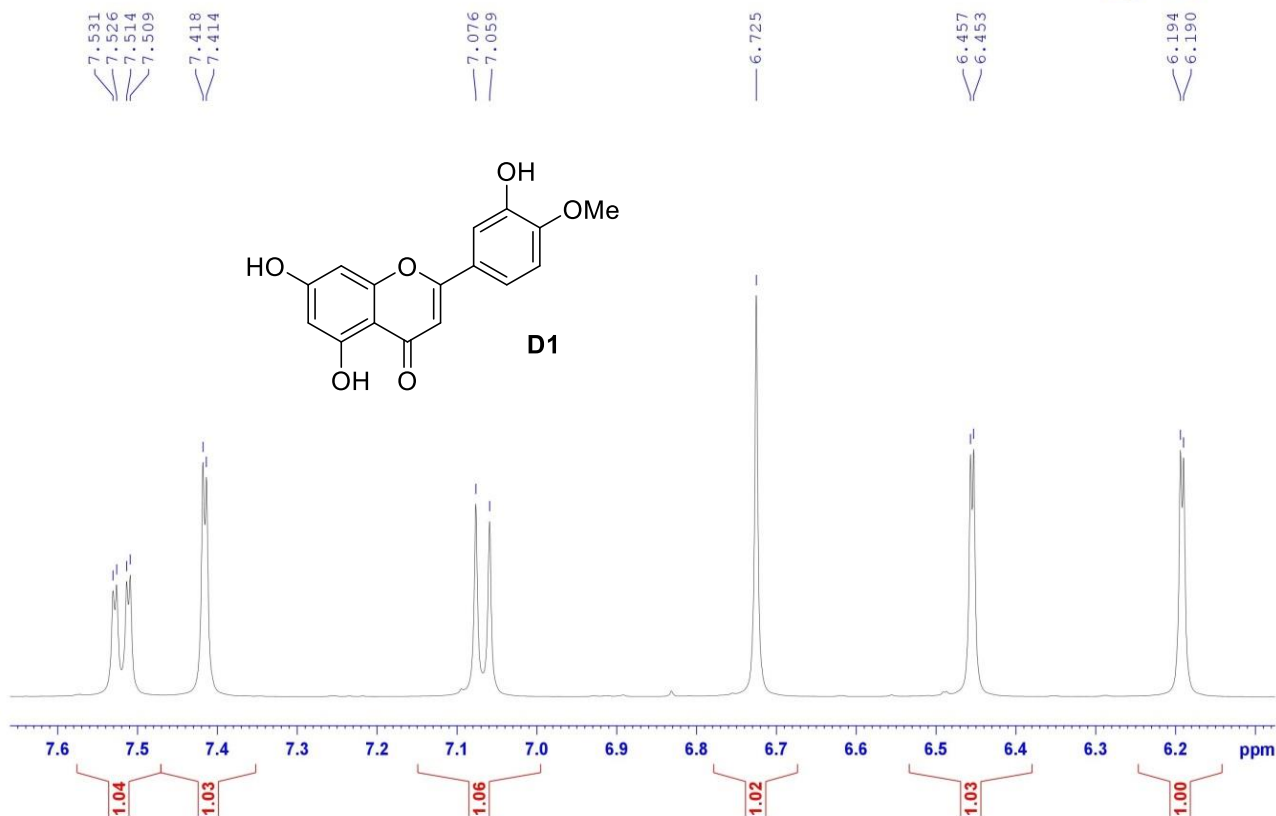

DT-DMSO-C13CPD

**$^{13}\text{C}$ -NMR**

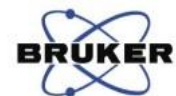

181.66  
164.17  
163.51  
161.46  
157.30  
151.12  
146.78  
123.01  
118.68  
112.95  
112.13  
103.75  
103.51  
98.86  
93.88

55.74  
48.57  
40.01  
39.84  
39.67  
39.50  
39.34  
39.17  
39.00

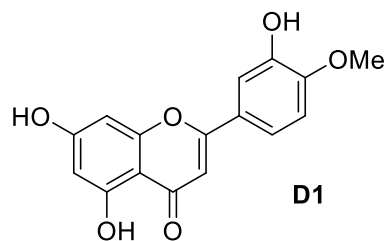

Current Data Parameters  
NAME 110HUAN\_HD1  
EXPNO 2  
PROCNO 1

F2 - Acquisition Parameters  
Date\_ 20190129  
Time 18.54  
INSTRUM spect  
PROBHD 5 mm PABBO BB/  
PULPROG zgpg30  
TD 65536  
SOLVENT DMSO  
NS 512  
DS 4  
SWH 29761.904 Hz  
FIDRES 0.454131 Hz  
AQ 1.1010048 sec  
RG 198.57  
DW 16.800 usec  
DE 6.50 usec  
TE 302.7 K  
D1 2.00000000 sec  
D11 0.03000000 sec  
TD0 1

==== CHANNEL f1 =====  
SFO1 125.7679670 MHz  
NUC1 13C  
P1 10.00 usec  
PLW1 88.00000000 W

==== CHANNEL f2 =====  
SFO2 500.2020008 MHz  
NUC2 1H  
CPDPRG[2] waltz16  
PCPD2 80.00 usec  
PLW2 22.00000000 W  
PLW12 0.34375000 W  
PLW13 0.22000000 W

F2 - Processing parameters  
SI 32768  
SF 125.7754515 MHz  
WDW EM  
SSB 0  
LB 1.00 Hz  
GB 0  
PC 1.40

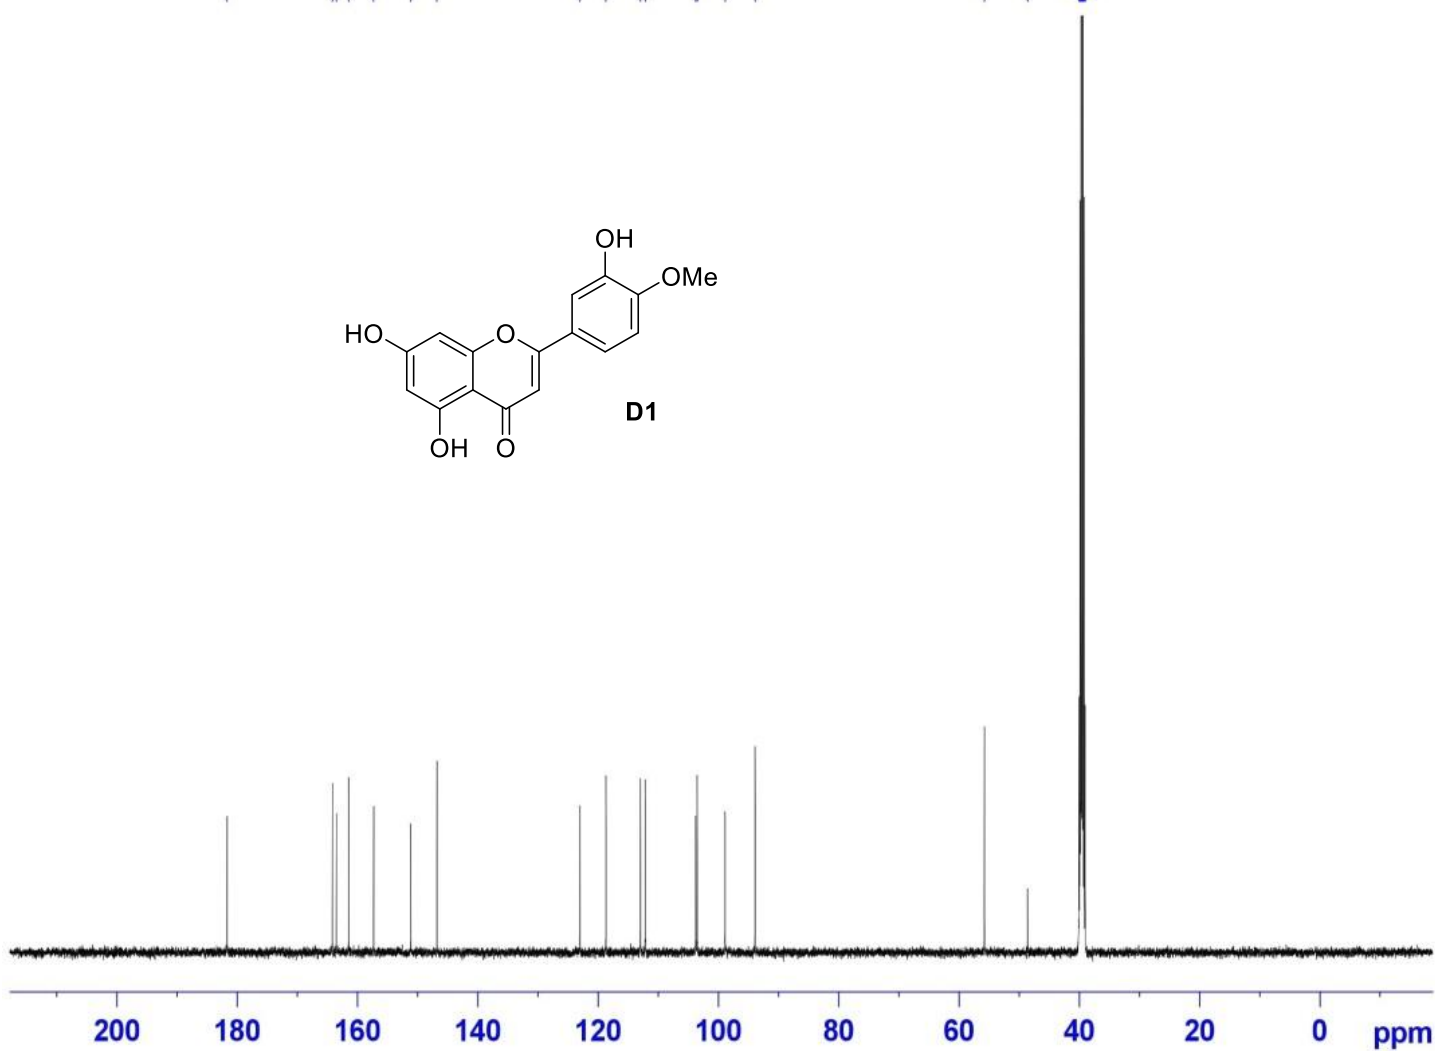

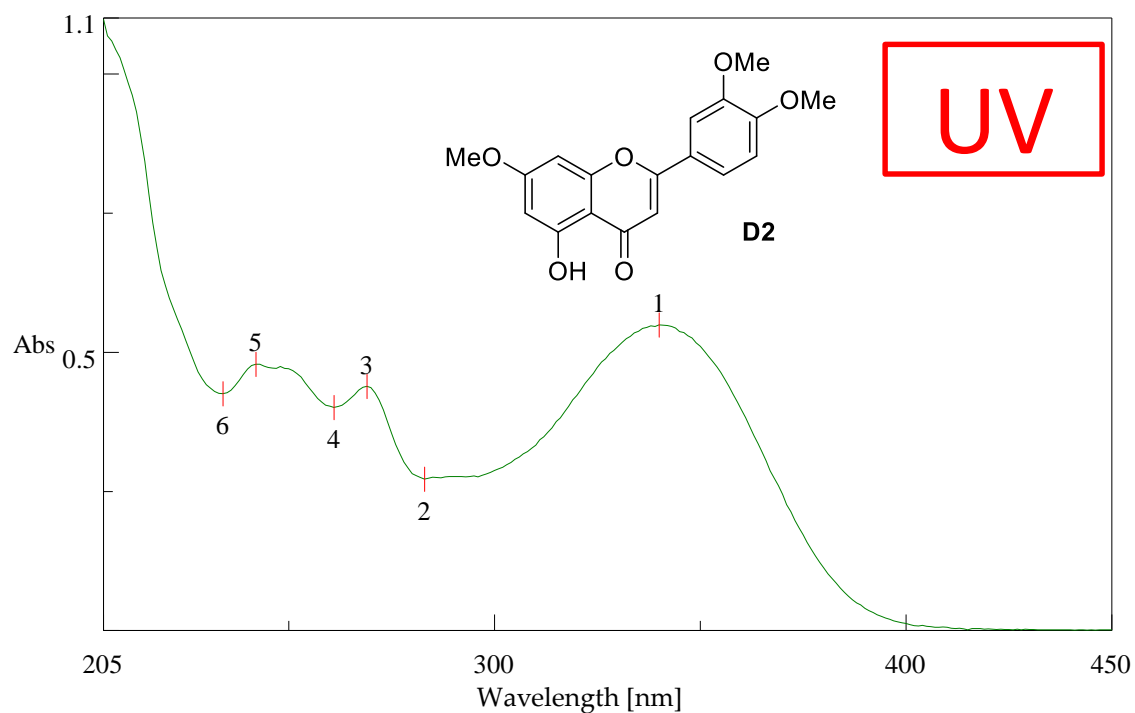

[ Result of Peak Picking ]

| No. | Position | Intensity | No. | Position | Intensity | No. | Position | Intensity |
|-----|----------|-----------|-----|----------|-----------|-----|----------|-----------|
| 1   | 340      | 0.548955  | 2   | 283      | 0.271724  | 3   | 269      | 0.438749  |
| 4   | 261      | 0.400295  | 5   | 242      | 0.478333  | 6   | 234      | 0.425517  |

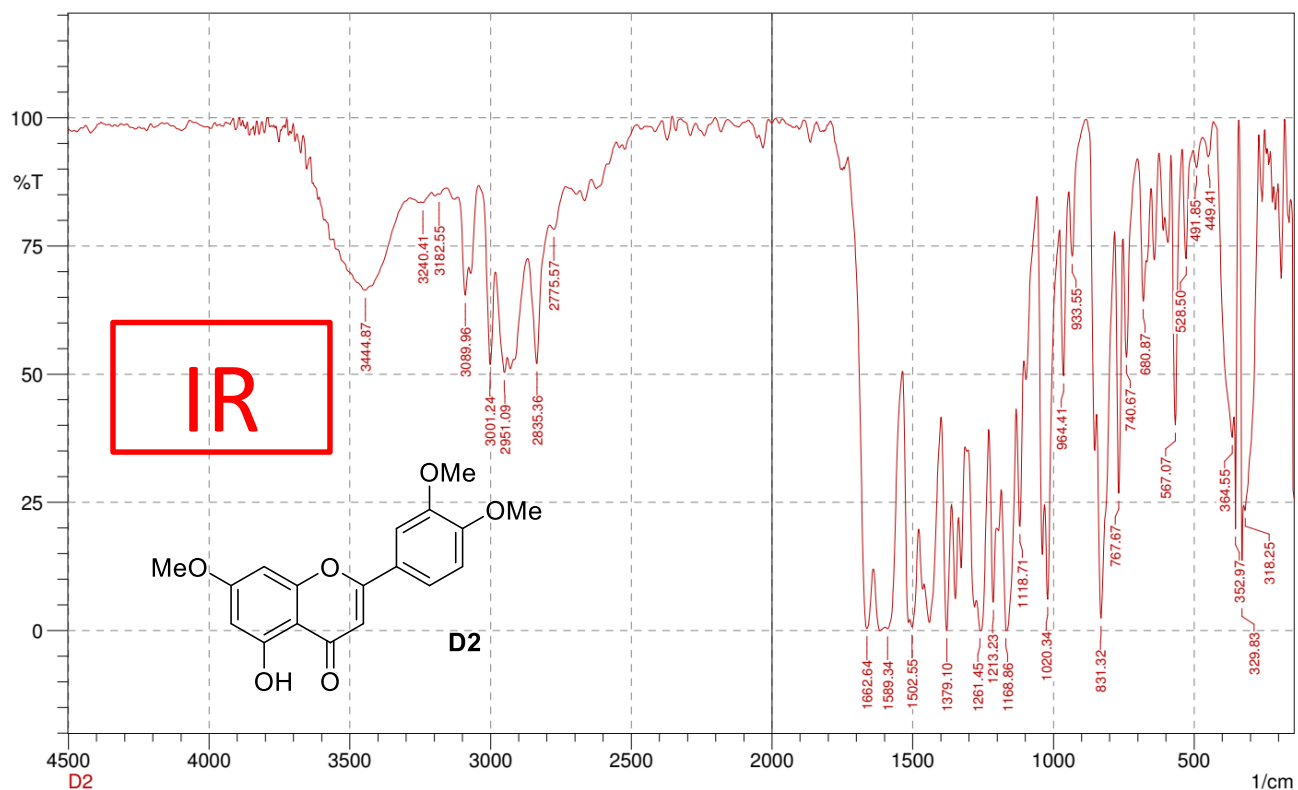



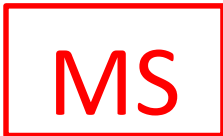

## Qualitative Analysis Report

**Data Filename** 4-DDM.d **Sample Name** 4-DDM  
**Sample Type** Sample **Position** P2-B5  
**Instrument Name** Instrument 1 **User Name**  
**Acq Method** Cot ngan - MSMS\_Pos.m **Acquired Time** 04/08/2020 7:34:20 PM  
**IRM Calibration Status** Success **DA Method** COTNGAN.M.m  
**Comment**  
**Sample Group** **Info.**  
**Stream Name** LC 1 **Acquisition SW** 6200 series TOF/6500 series  
**Version** Q-TOF B.06.01 (B6172 SP1)

### User Chromatograms

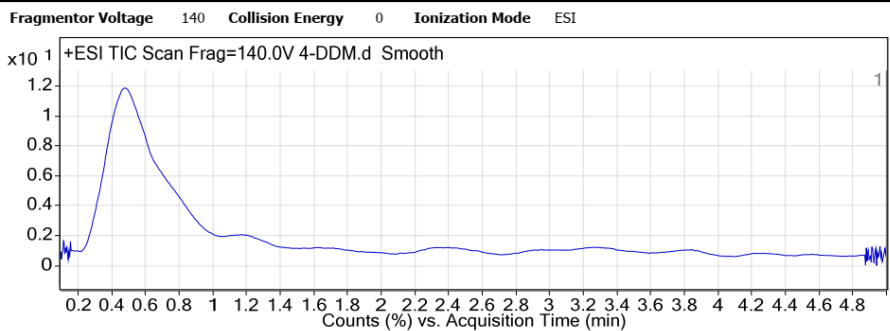

### User Spectra

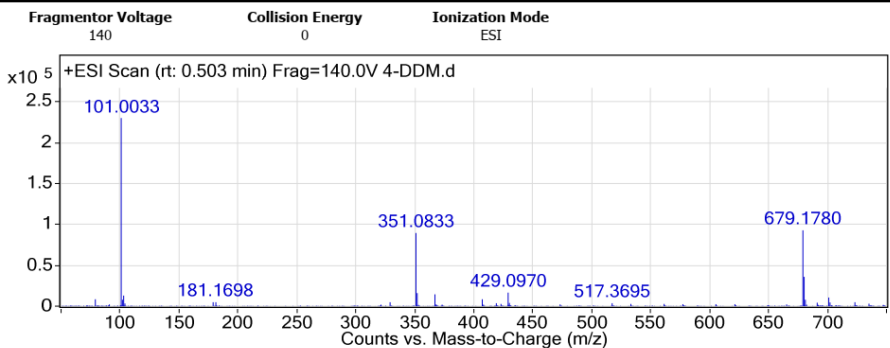

### Peak List

| m/z      | z | Abund     |
|----------|---|-----------|
| 79.0211  |   | 8484.25   |
| 101.0033 | 1 | 230221.81 |
| 102.999  | 1 | 12995.89  |
| 351.0833 | 1 | 89560.98  |
| 352.0868 | 1 | 15988.85  |
| 367.0573 | 1 | 14627.99  |
| 429.097  | 1 | 16630.26  |
| 679.178  | 1 | 92758.16  |
| 680.1805 | 1 | 36038.07  |
| 701.1592 | 1 | 10518.93  |

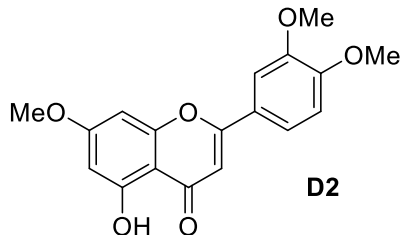

--- End Of Report ---

# MS

|               |         |             |                      |                 |              |                        |                       |
|---------------|---------|-------------|----------------------|-----------------|--------------|------------------------|-----------------------|
| Sample Name   | 4-DDM   | Position    | P2-B5                | Instrument Name | Instrument 1 | User Name              |                       |
| Inj Vol       | 2       | InjPosition |                      | SampleType      | Sample       | IRM Calibration Status | Success               |
| Data Filename | 4-DDM.d | ACQ Method  | Cot ngan - MSMS_Pos. | Comment         |              | Acquired Time          | 04/08/2020 7:34:20 PM |

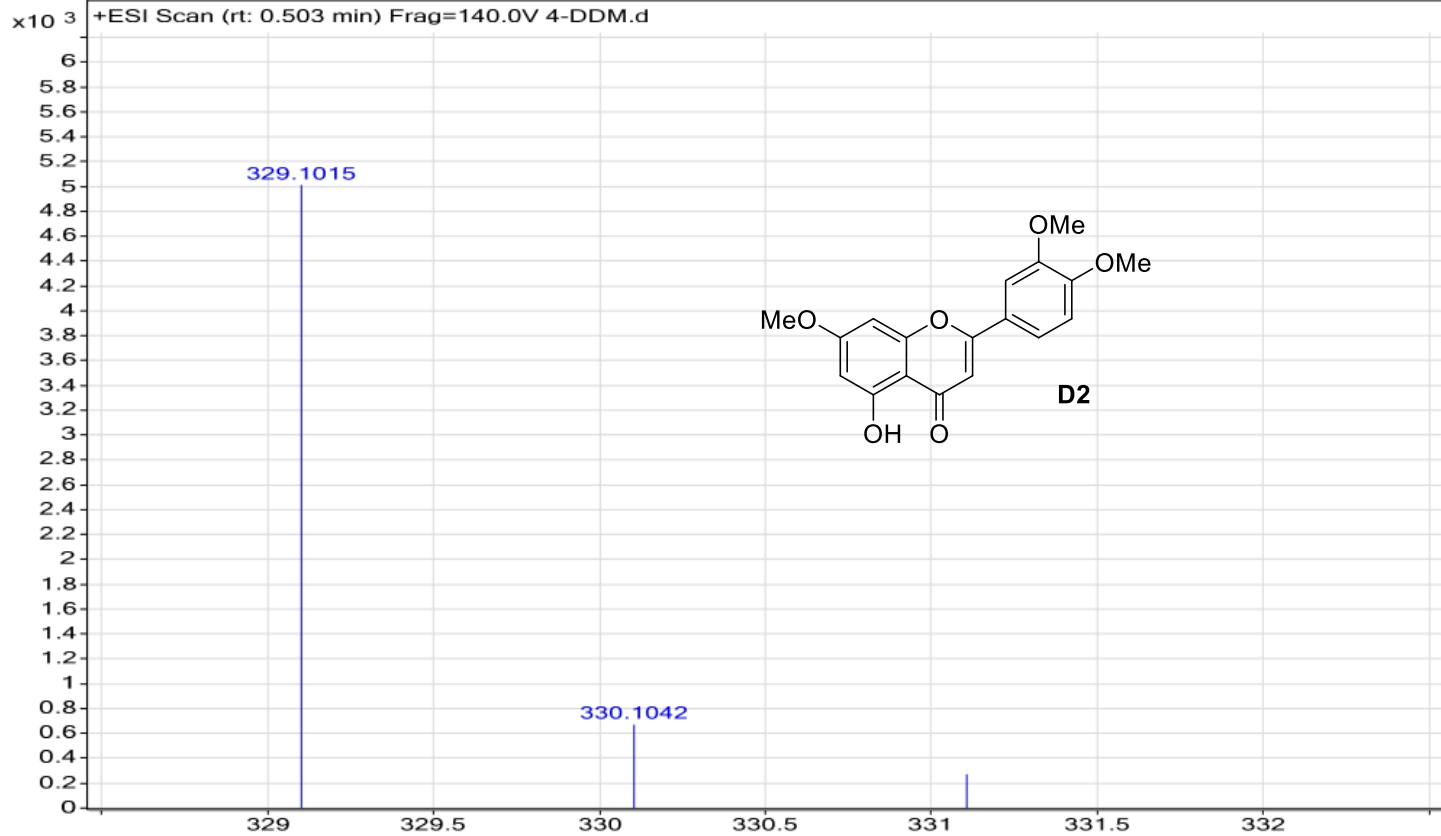

# <sup>1</sup>H-NMR

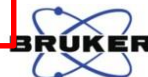

DDM-DMSO-1H

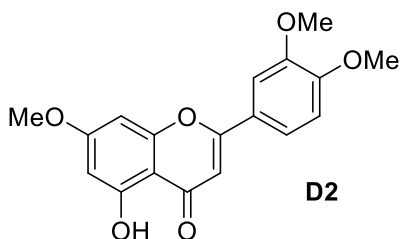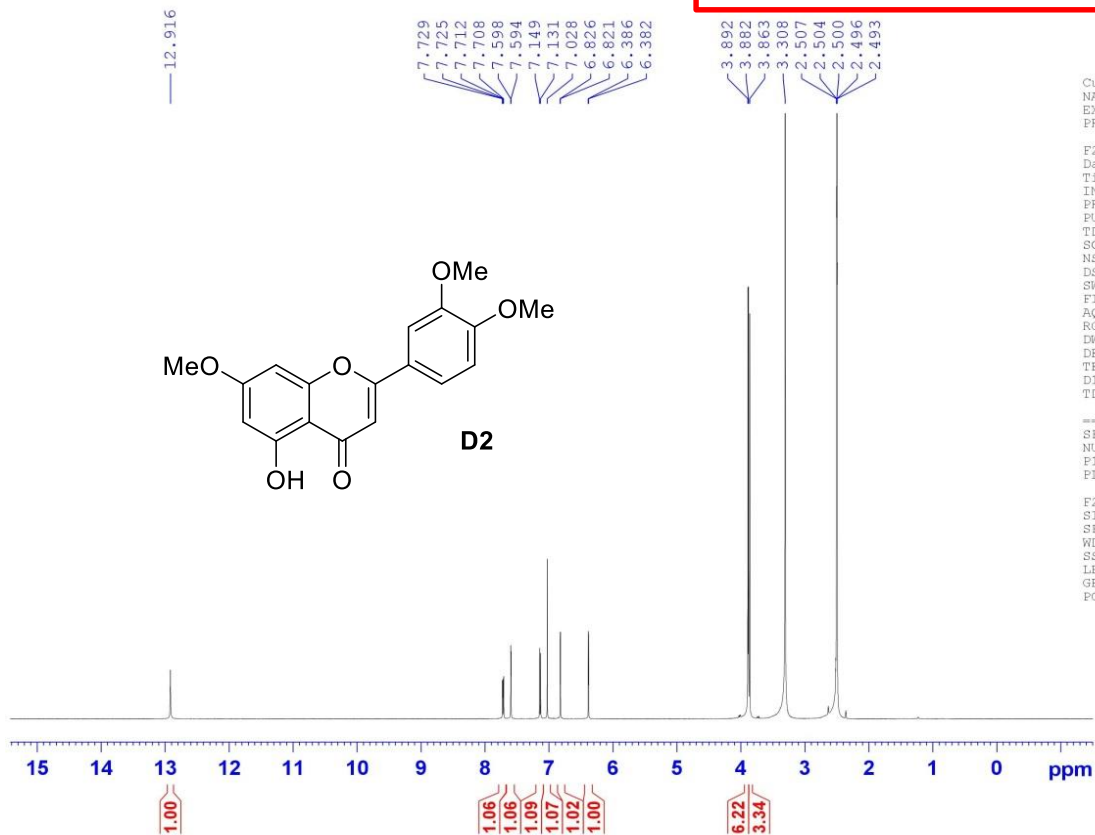

Current Data Parameters  
NAME 110HUAN\_DDM  
EXPNO 10  
PROCNO 1

F2 - Acquisition Parameters  
Date\_ 20190401  
Time\_ 17.23  
INSTRUM spect  
PROBHD 5 mm PABBO BB/  
PULPROG zg30  
TD 65536  
SOLVENT DMSO  
NS 16  
DS 2  
SWH 10000.000 Hz  
FIDRES 0.152588 Hz  
AQ 3.2767999 sec  
RG 142.98  
DW 50.000 usec  
DE 6.50 usec  
TE 303.0 K  
D1 1.00000000 sec  
TDO 1

===== CHANNEL f1 =====  
SFO1 500.2049890 MHz  
NUC1 1H  
P1 10.00 usec  
PLW1 22.00000000 W

F2 - Processing parameters  
SI 65536  
SF 500.2019053 MHz  
WDW EM  
SSB 0  
LB 0.30 Hz  
GB 0  
PC 1.00

DDM-DMSO-1H

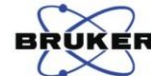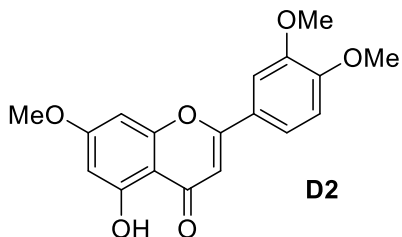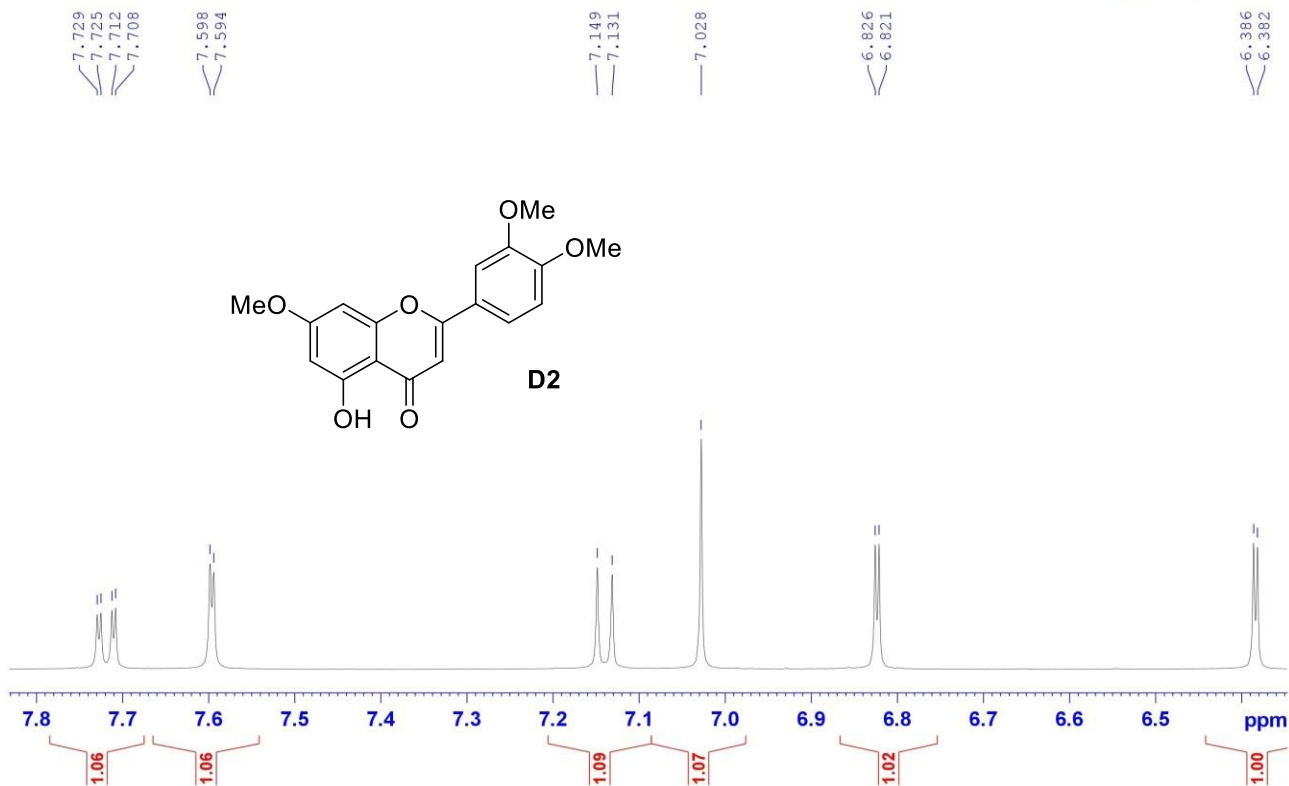

DDM-DMSO-C13CPD

**<sup>13</sup>C-NMR**

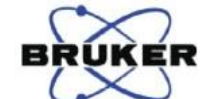

— 181.96  
— 165.16  
— 163.60  
— 161.12  
— 157.25  
— 152.24  
— 149.02  
  
— 122.73  
— 120.13  
— 111.69  
— 109.51  
— 104.71  
— 103.98  
— 98.01  
— 92.73

56.04  
55.88  
55.73  
40.00  
39.83  
39.67  
39.50  
39.33  
39.16  
39.00

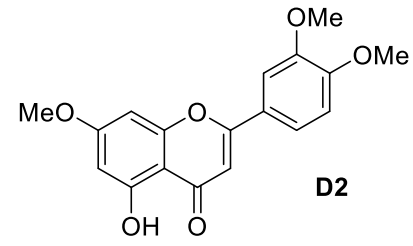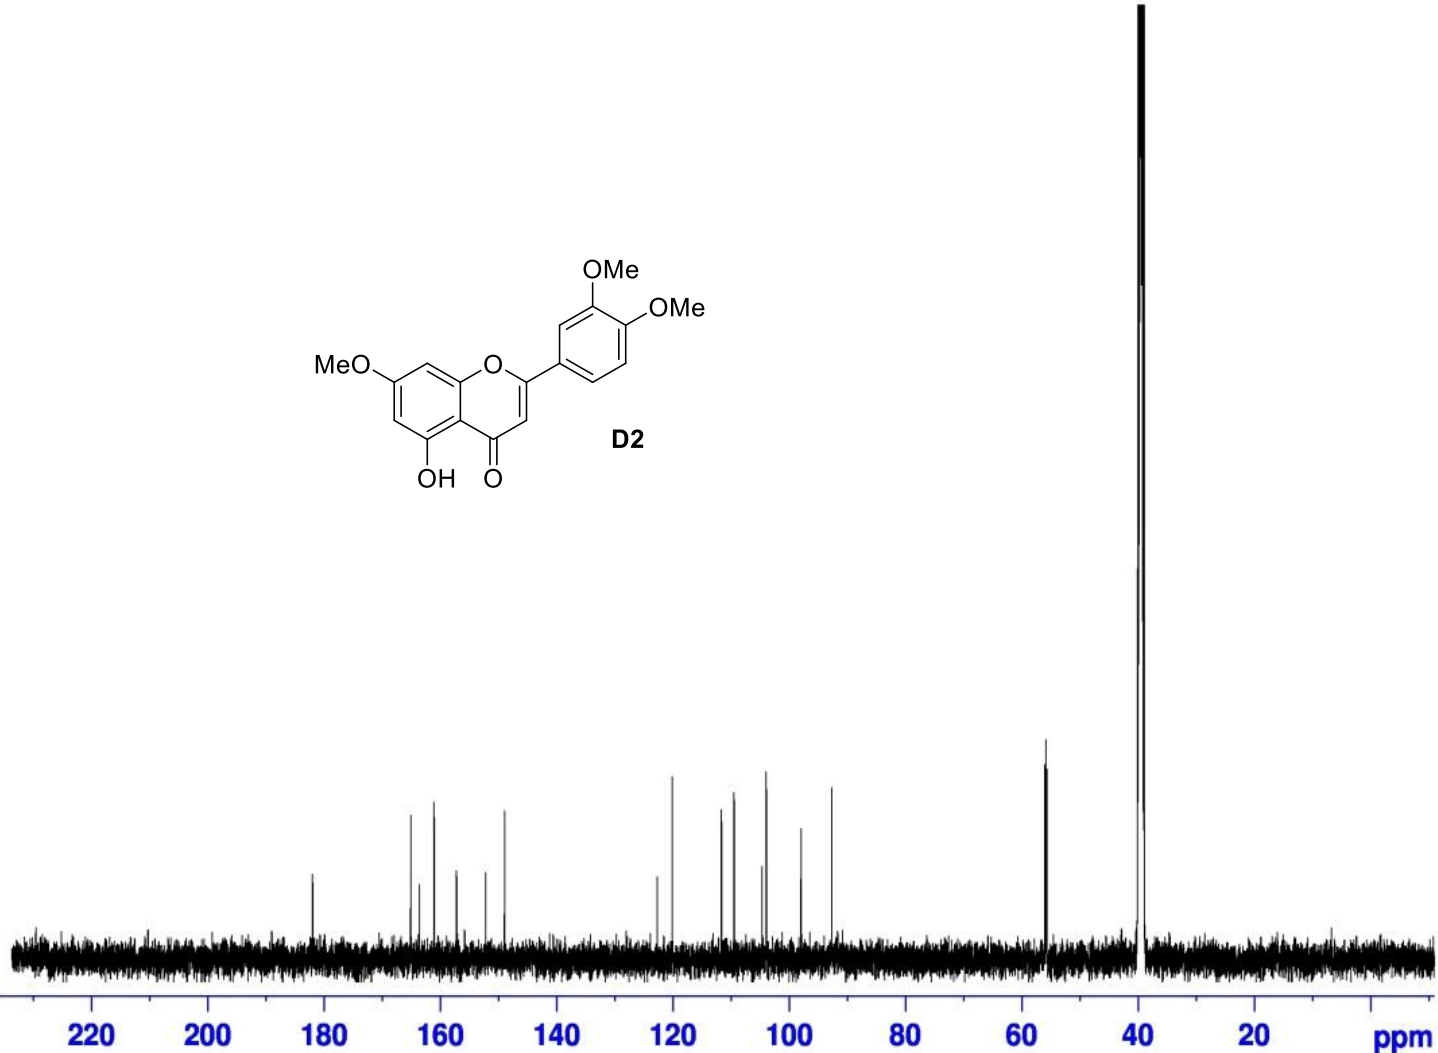

Current Data Parameters  
NAME 110HUAN\_DDM  
EXPNO 2  
PROCNO 1

F2 - Acquisition Parameters  
Date\_ 20190401  
Time 19.40  
INSTRUM spect  
PROBHD 5 mm PABBO BB/  
PULPROG zgpg30  
TD 65536  
SOLVENT DMSO  
NS 2048  
DS 4  
SWH 31250.000 Hz  
FIDRES 0.476837 Hz  
AQ 1.0485760 sec  
RG 198.57  
DW 16.000 usec  
DE 6.50 usec  
TE 303.5 K  
D1 2.00000000 sec  
D11 0.03000000 sec  
TD0 1

==== CHANNEL f1 =====  
SFO1 125.7897032 MHz  
NUC1 13C  
P1 10.00 usec  
PLW1 88.00000000 W

==== CHANNEL f2 =====  
SFO2 500.2039008 MHz  
NUC2 1H  
CPDPRG[2] waltz16  
PCPD2 80.00 usec  
PLW2 22.00000000 W  
PLW12 0.34375000 W  
PLW13 0.22000000 W

F2 - Processing parameters  
SI 32768  
SF 125.7759351 MHz  
WDW EM  
SSB 0  
LB 1.00 Hz  
GB 0  
PC 1.40

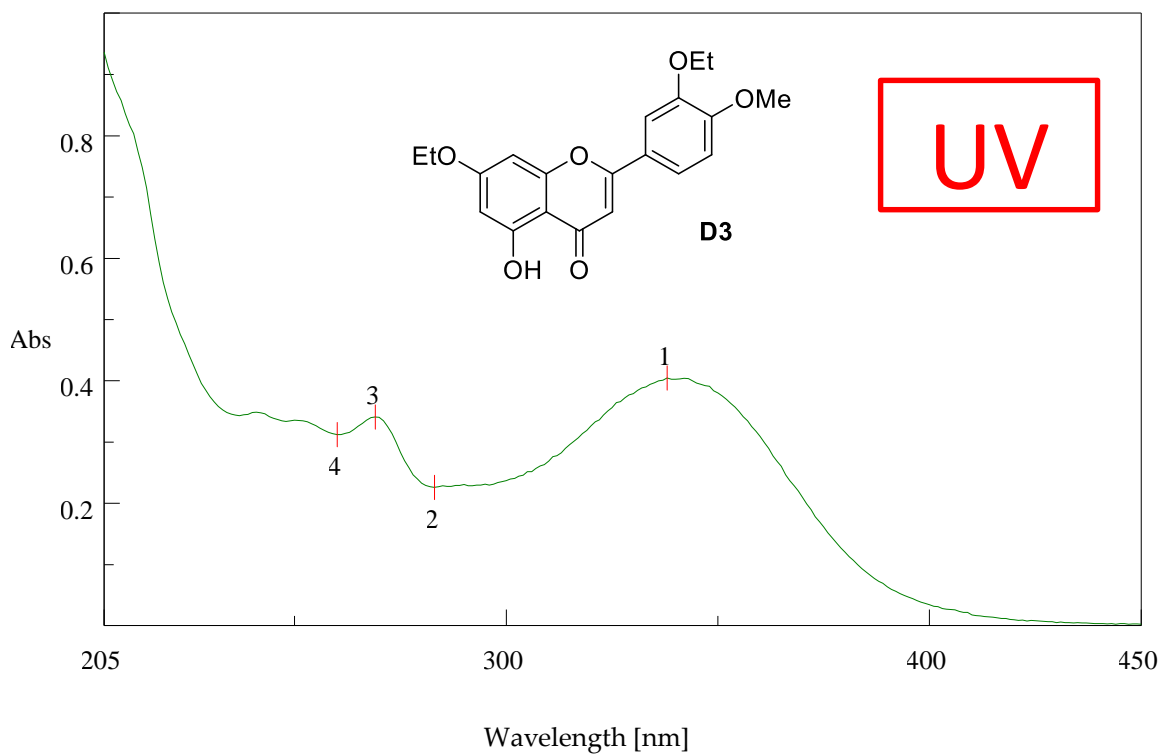

[ Result of Peak Picking ]

| No. | Position | Intensity | No. | Position | Intensity | No. | Position | Intensity |
|-----|----------|-----------|-----|----------|-----------|-----|----------|-----------|
| 1   | 338      | 0.404347  | 2   | 283      | 0.225658  | 3   | 269      | 0.340507  |
| 4   | 260      | 0.311738  |     |          |           |     |          |           |

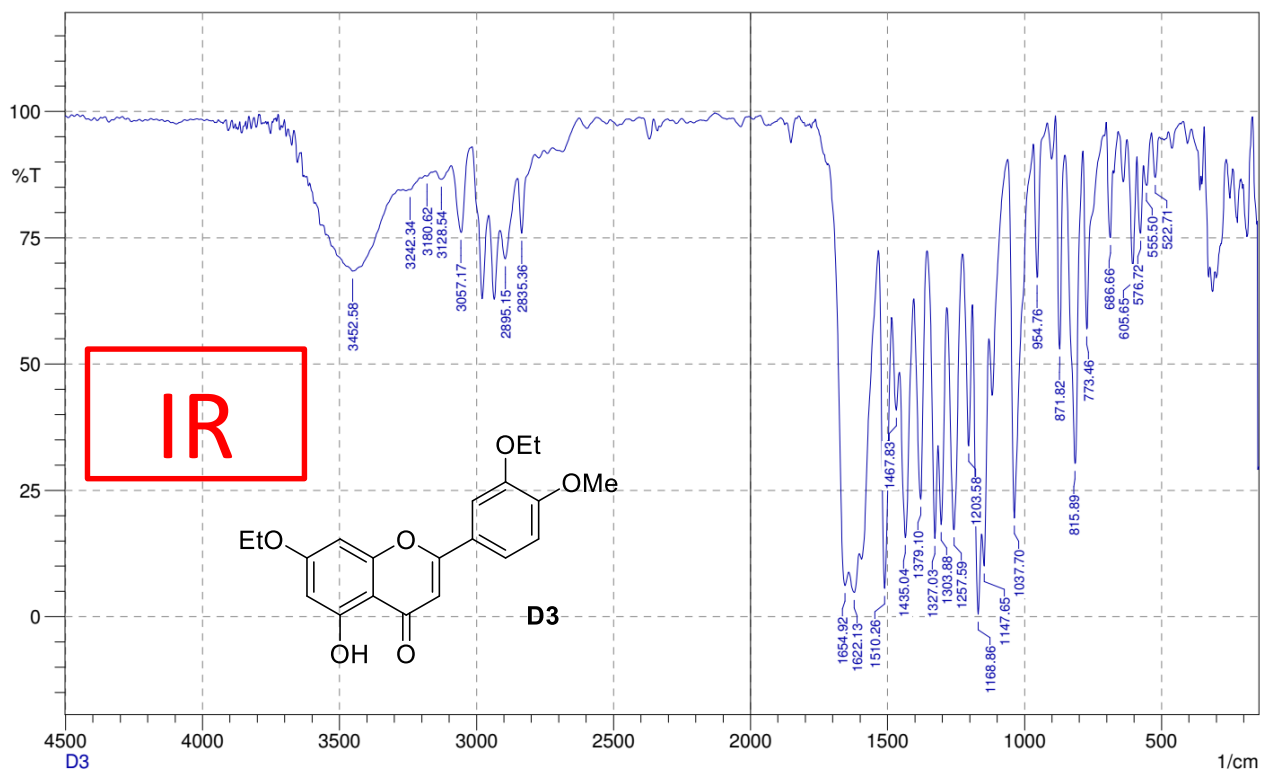

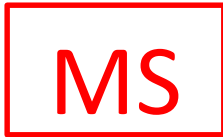

## Qualitative Analysis Report

**Data Filename** 6-DDE.d **Sample Name** 6-DDE  
**Sample Type** Sample **Position** P2-B3  
**Instrument Name** Instrument 1 **User Name**  
**Acq Method** Cot ngan - MSMS\_Pos.m **Acquired Time** 04/08/2020 7:23:11 PM  
**IRM Calibration Status** Success **DA Method** COTNGAN.M.m  
**Comment**  
**Sample Group** **Info.**  
**Stream Name** LC 1 **Acquisition SW** 6200 series TOF/6500 series  
**Version** Q-TOF B.06.01 (B6172 SP1)

### User Chromatograms

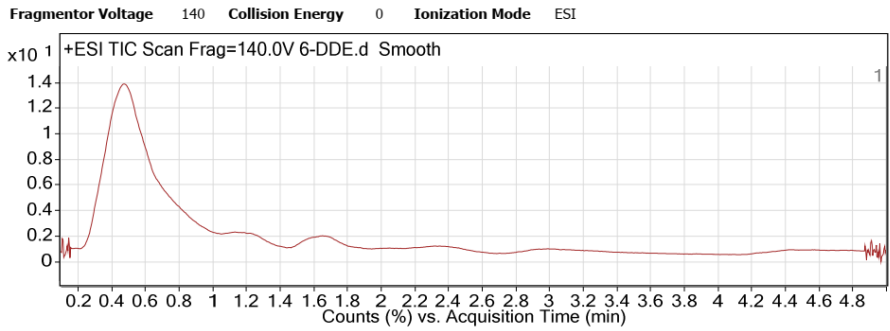

### User Spectra

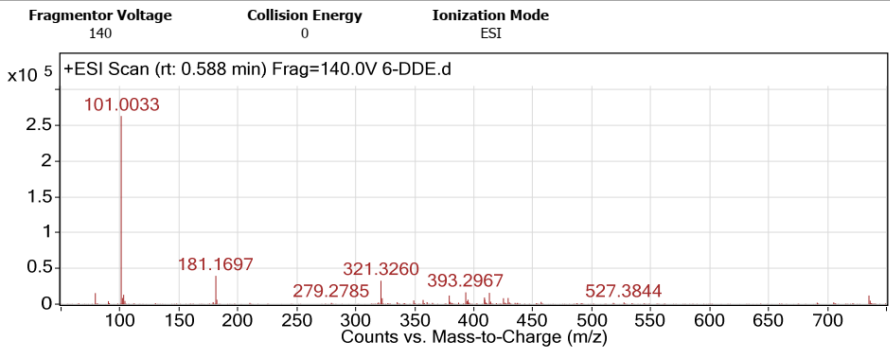

### Peak List

| m/z      | z | Abund     |
|----------|---|-----------|
| 79.0209  | 1 | 15483.26  |
| 101.0033 | 1 | 263178.06 |
| 102.9988 | 1 | 13295.03  |
| 181.1697 | 1 | 39590.21  |
| 321.326  | 1 | 32958.98  |
| 379.1142 | 1 | 12143.51  |
| 393.2967 | 1 | 16460.94  |
| 409.1613 | 1 | 9409.05   |
| 413.2654 | 1 | 15935.65  |
| 735.2404 | 1 | 12220.2   |

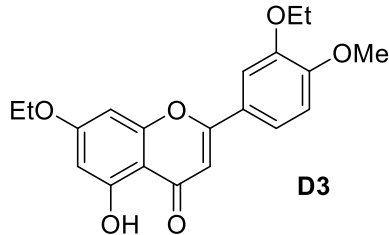

--- End Of Report ---

# MS

|               |         |             |                      |                 |              |                        |                       |
|---------------|---------|-------------|----------------------|-----------------|--------------|------------------------|-----------------------|
| Sample Name   | 6-DDE   | Position    | P2-B3                | Instrument Name | Instrument 1 | User Name              |                       |
| Inj Vol       | 2       | InjPosition |                      | SampleType      | Sample       | IRM Calibration Status | Success               |
| Data Filename | 6-DDE.d | ACQ Method  | Cot ngan - MSMS_Pos. | Comment         |              | Acquired Time          | 04/08/2020 7:23:11 PM |

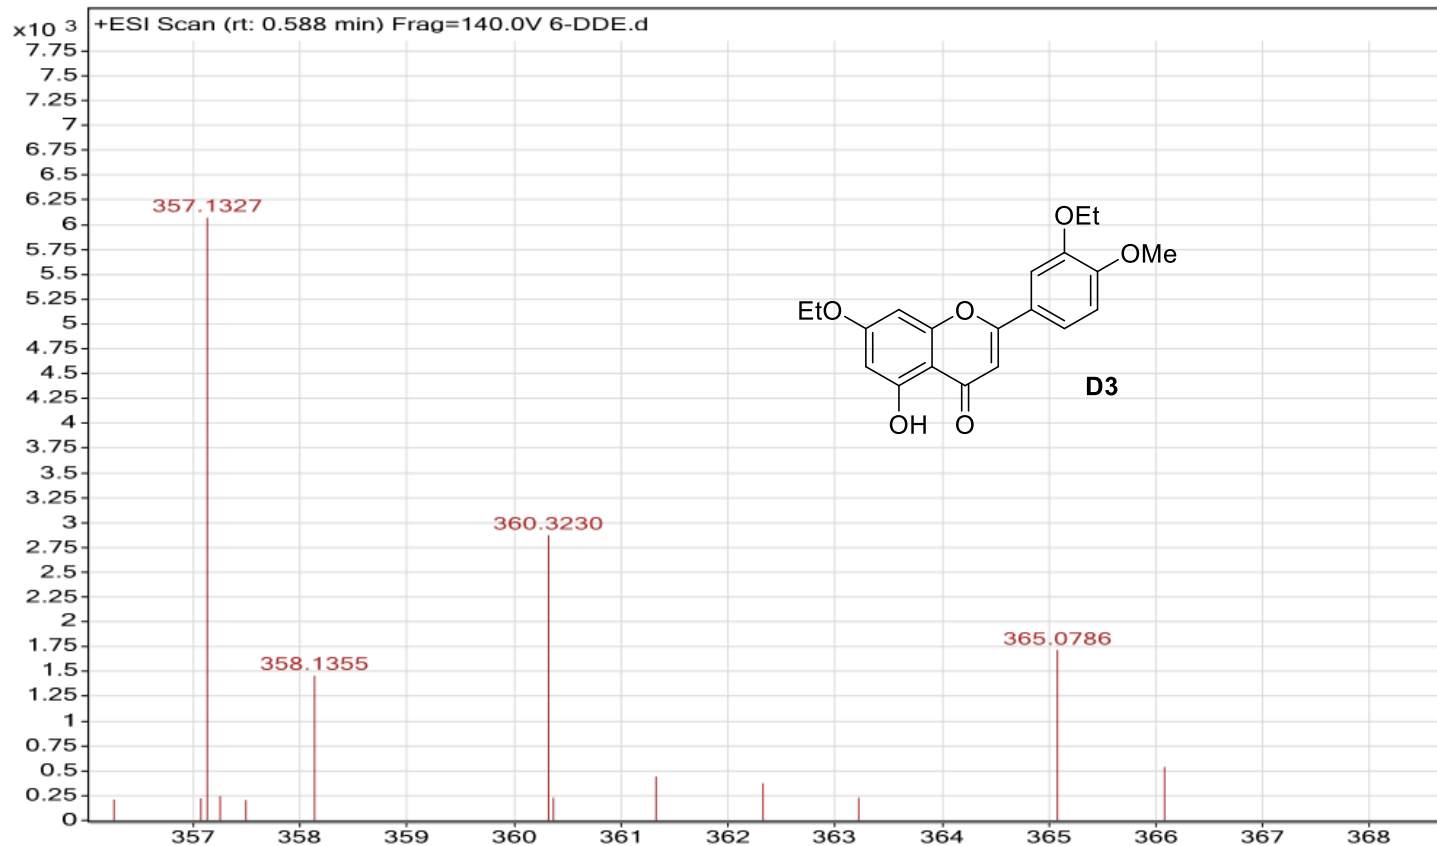

DDE-DMSO-1H

**<sup>1</sup>H-NMR**

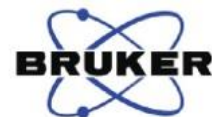

— 12.899

7.712  
7.707  
7.695  
7.690  
7.582  
7.577  
7.144  
7.127  
6.999  
6.800  
6.795  
6.354  
6.350  
4.184  
4.177  
4.170  
4.163  
4.156  
4.149  
4.142  
4.136  
3.863  
3.308  
2.507  
2.504  
2.500  
2.497  
2.493  
1.383  
1.376  
1.369  
1.363  
1.355  
1.349

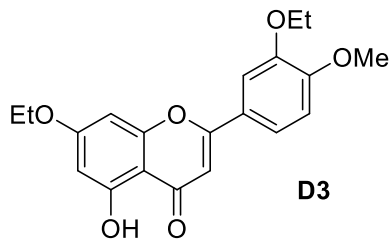

Current Data Parameters  
NAME 110HUAN\_DDE  
EXPNO 10  
PROCNO 1

F2 - Acquisition Parameters  
Date\_ 20190401  
Time 17.13  
INSTRUM spect  
PROBHD 5 mm PABBO BB/  
PULPROG zg30  
TD 65536  
SOLVENT DMSO  
NS 16  
DS 2  
SWH 10000.000 Hz  
FIDRES 0.152588 Hz  
AQ 3.2767999 sec  
RG 142.98  
DW 50.000 usec  
DE 6.50 usec  
TE 303.0 K  
D1 1.00000000 sec  
TD0 1

===== CHANNEL f1 =====  
SF01 500.2049890 MHz  
NUC1 1H  
P1 10.00 usec  
PLW1 22.00000000 W

F2 - Processing parameters  
SI 65536  
SF 500.2019051 MHz  
WDW EM  
SSB 0  
LB 0.30 Hz  
GB 0  
PC 1.00

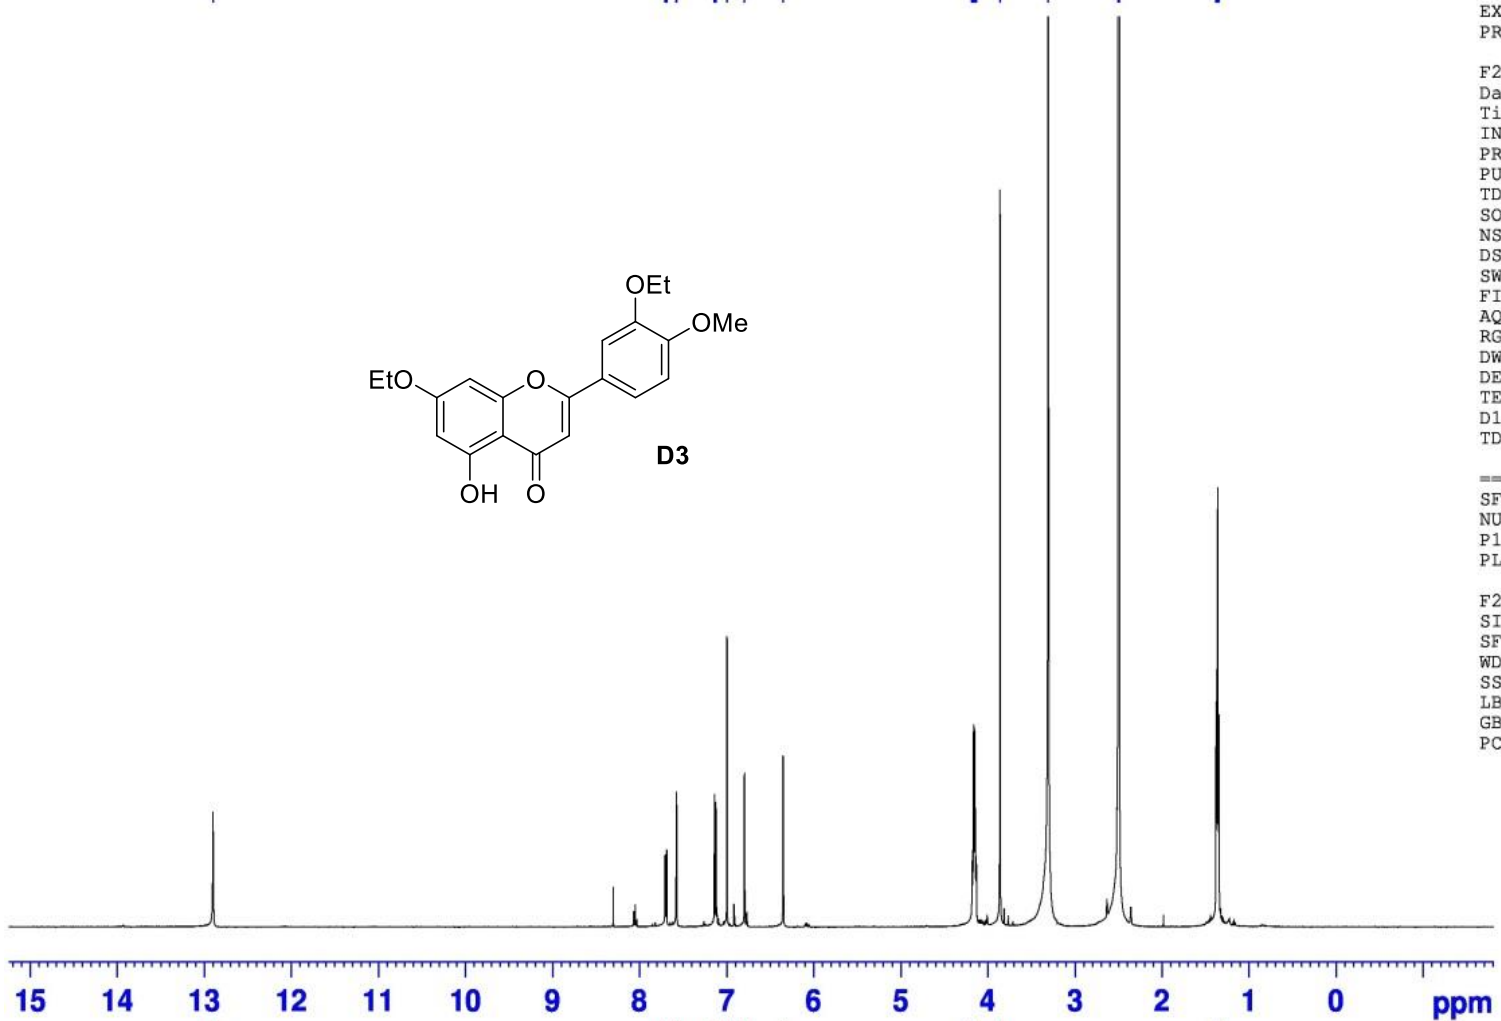

1.09

1.09  
1.00  
1.08  
1.07  
1.11  
1.06

4.63  
3.31

7.11



DDE-DMSO-1H

# <sup>1</sup>H-NMR

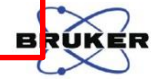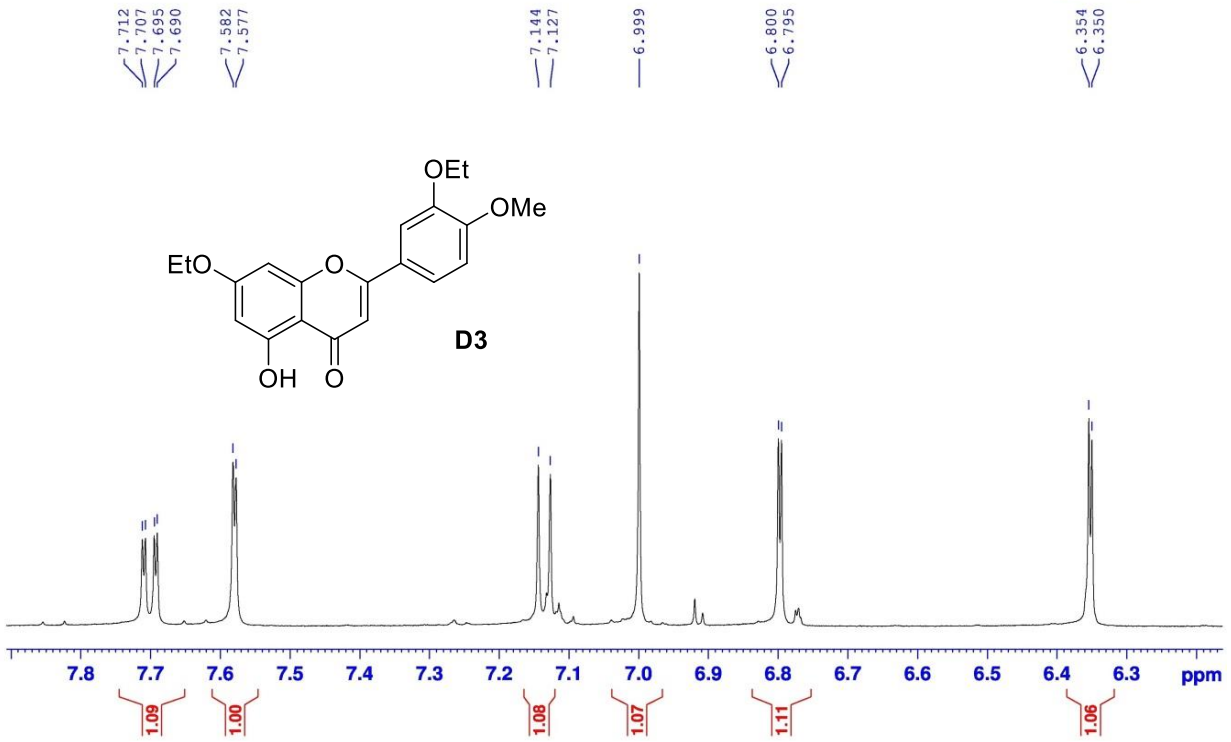

DDE-DMSO-1H

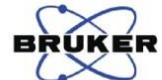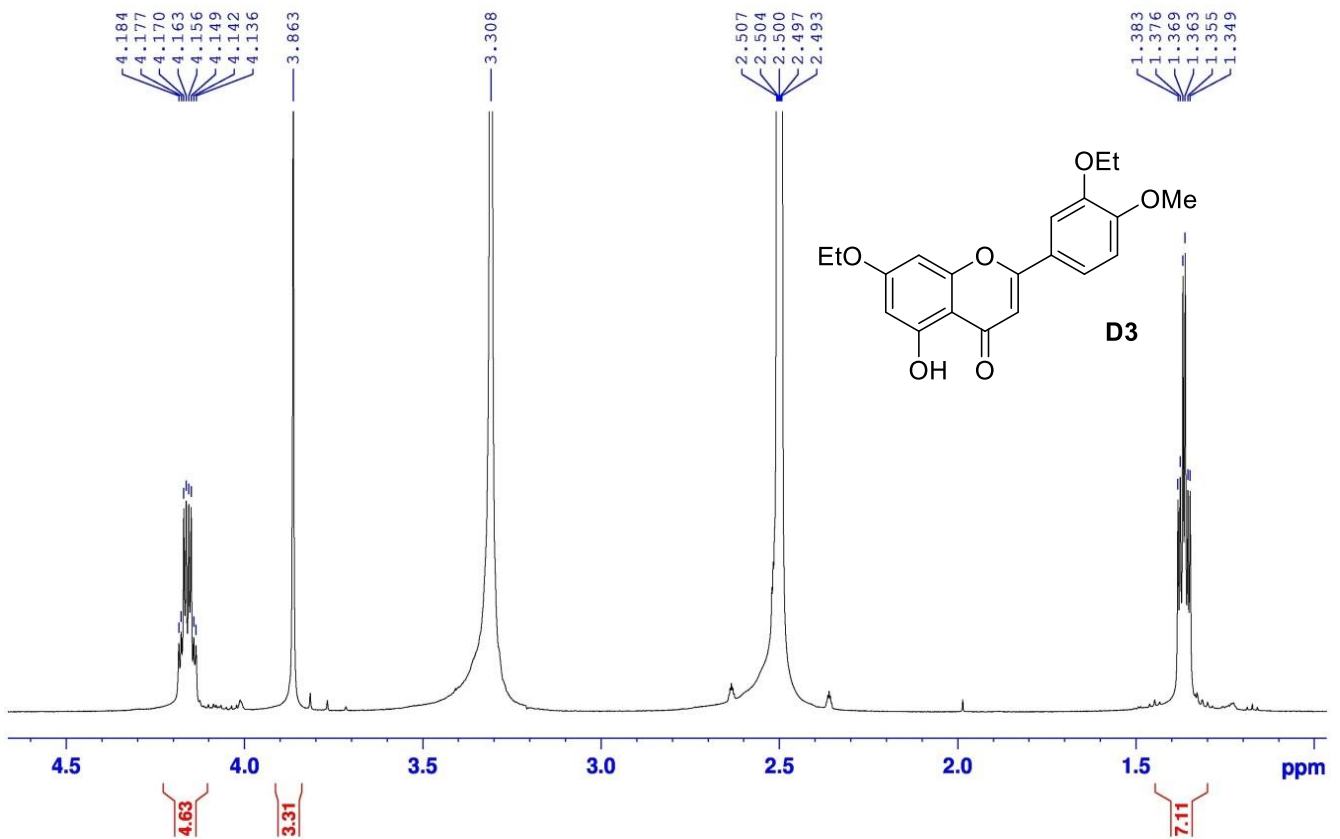

# DDE-DMSO-C13CPD

# <sup>13</sup>C-NMR

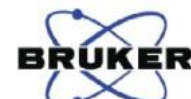

Current Data Parameters  
NAME 110HUAN\_DDE  
EXPNO 2  
PROCNO 1

F2 - Acquisition Parameters  
Date\_ 20190401  
Time 18.25  
INSTRUM spect  
PROBHD 5 mm PABBO BB/  
PULPROG zgpg30  
TD 65536  
SOLVENT DMSO  
NS 2048  
DS 4  
SWH 31250.000 Hz  
FIDRES 0.476837 Hz  
AQ 1.0485760 sec  
RG 198.57  
DW 16.000 usec  
DE 6.50 usec  
TE 303.4 K  
D1 2.00000000 sec  
D11 0.03000000 sec  
TD0 1

===== CHANNEL f1 =====  
SFO1 125.7897032 MHz  
NUC1 13C  
P1 10.00 usec  
PLW1 88.00000000 W

===== CHANNEL f2 =====  
SFO2 500.2039008 MHz  
NUC2 1H  
CPDPRG[2] waltz16  
PCPD2 80.00 usec  
PLW2 22.00000000 W  
PLW12 0.34375000 W  
PLW13 0.22000000 W

F2 - Processing parameters  
SI 32768  
SF 125.7759349 MHz  
WDW EM  
SSB 0  
LB 1.00 Hz  
GB 0  
PC 1.40

- 181.92
- 164.42
- 163.59
- 161.11
- 157.26
- 152.37
- 148.22
- 122.72
- 120.10
- 111.80
- 110.48
- 104.62
- 103.92
- 98.29
- 93.06
- 64.16
- 64.10
- 55.70
- 40.00
- 39.83
- 39.66
- 39.50
- 39.33
- 39.16
- 39.00
- 14.60
- 14.33

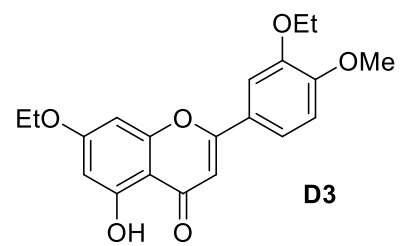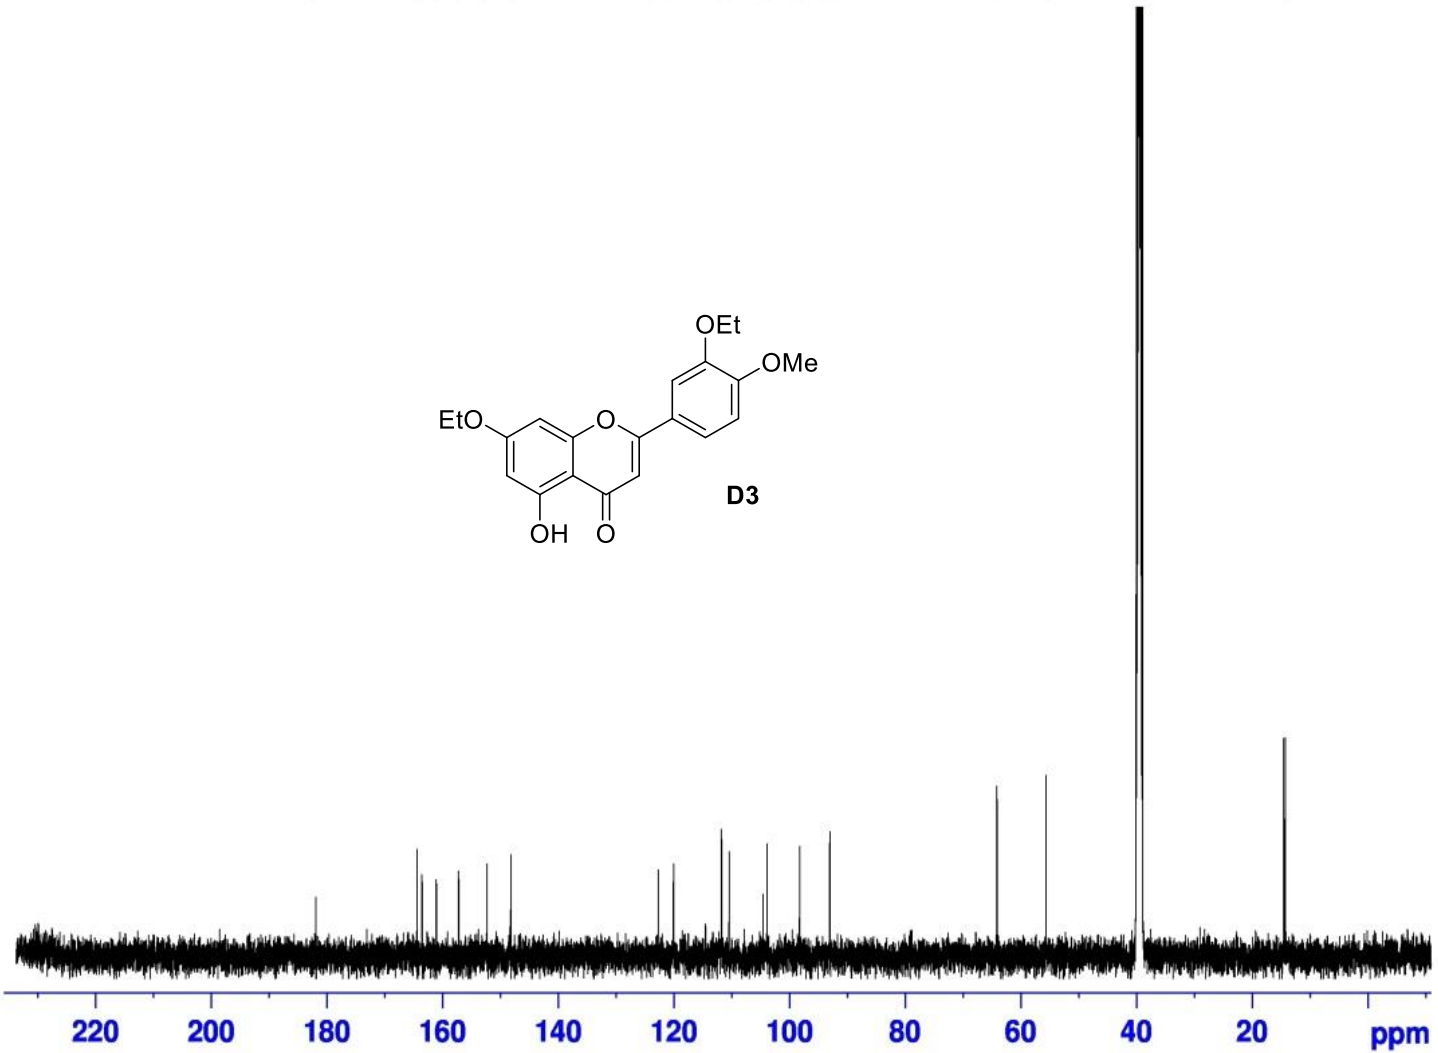

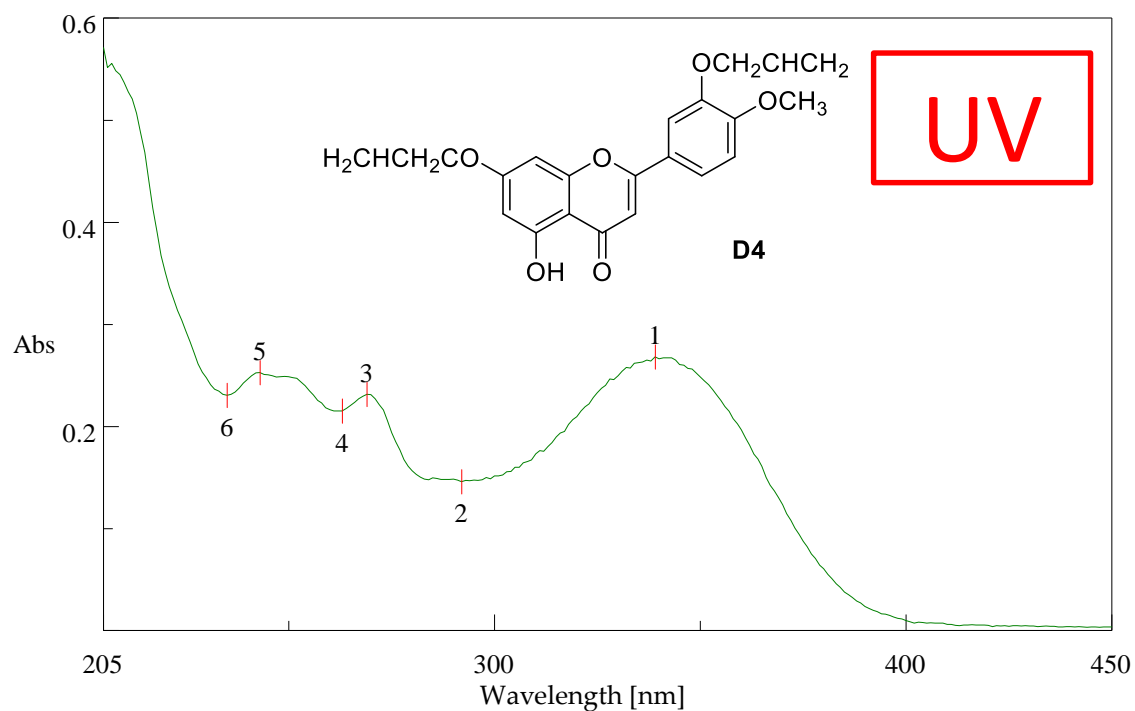

[ Result of Peak Picking ]

| No. | Position | Intensity | No. | Position | Intensity | No. | Position | Intensity |
|-----|----------|-----------|-----|----------|-----------|-----|----------|-----------|
| 1   | 339      | 0.268015  | 2   | 292      | 0.145635  | 3   | 269      | 0.231266  |
| 4   | 263      | 0.214911  | 5   | 243      | 0.252528  | 6   | 235      | 0.230563  |

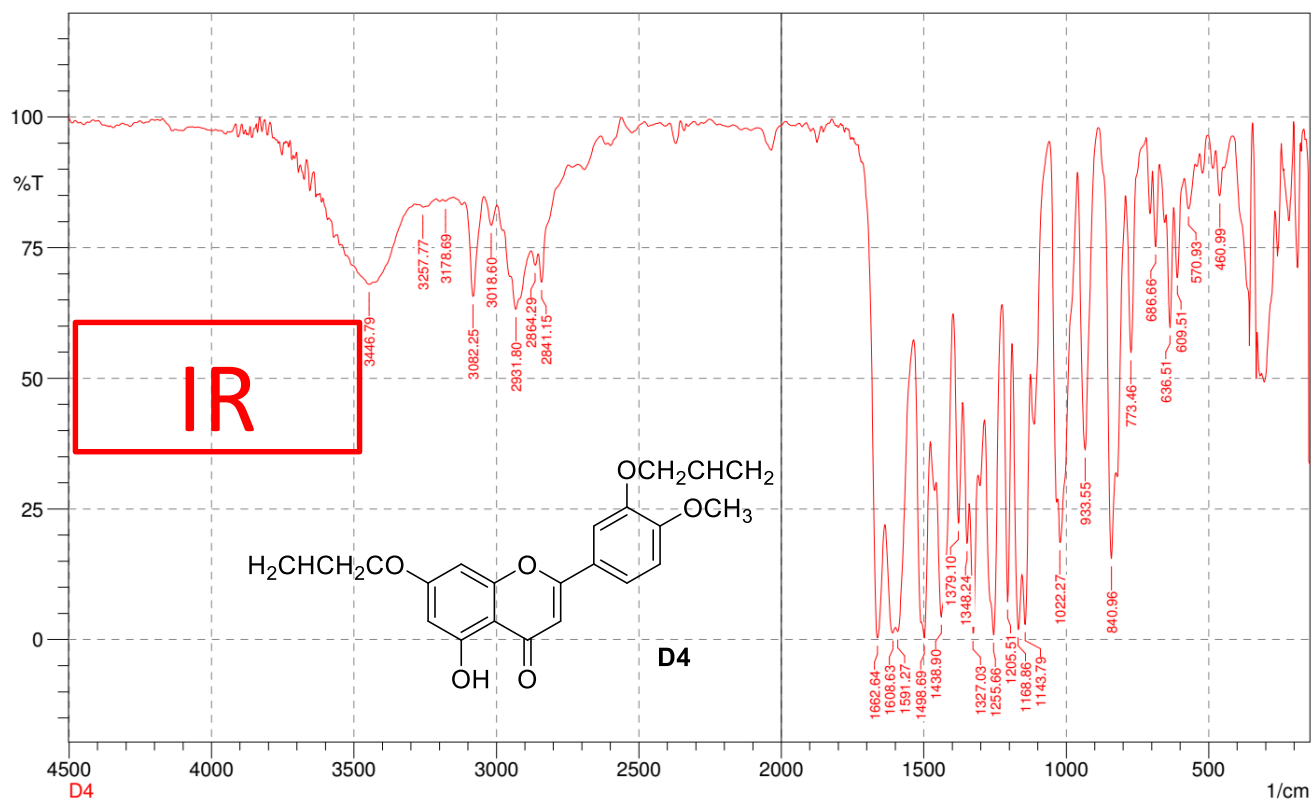

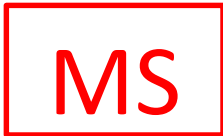

## Qualitative Analysis Report

**Data Filename** 0-DDAI.d **Sample Name** 0-DDAI  
**Sample Type** Sample **Position** P2-A9  
**Instrument Name** Instrument 1 **User Name**  
**Acq Method** Cot ngan - MSMS\_Pos.m **Acquired Time** 04/08/2020 7:06:30 PM  
**IRM Calibration Status** Success **DA Method** COTNGAN.M.m  
**Comment**  
**Sample Group** **Info.**  
**Stream Name** LC 1 **Acquisition SW** 6200 series TOF/6500 series  
**Version** Q-TOF B.06.01 (B6172 SP1)

### User Chromatograms

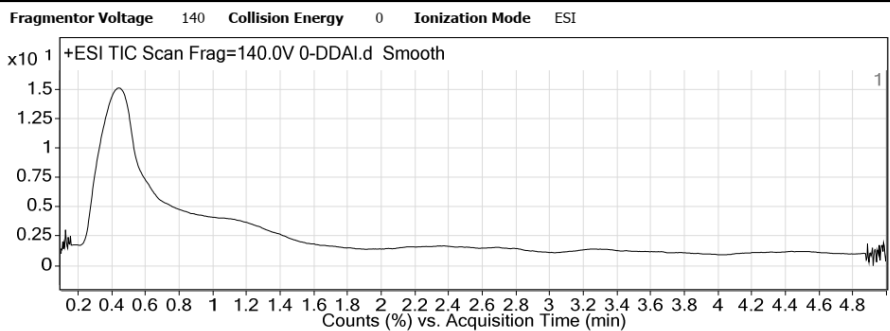

### User Spectra

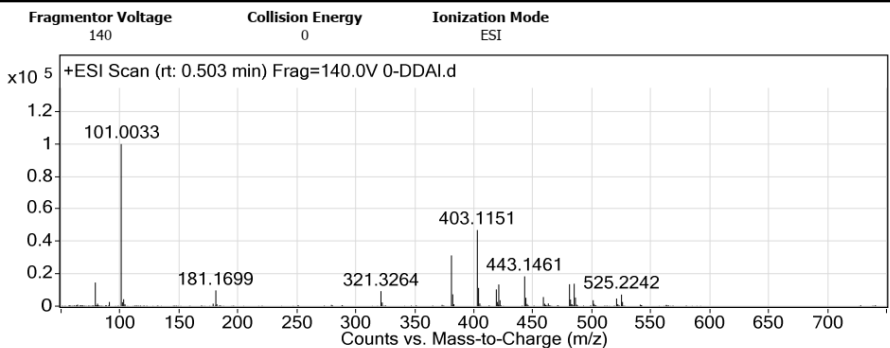

### Peak List

| m/z      | z | Abund     |
|----------|---|-----------|
| 101.0033 | 1 | 99821.3   |
| 381.1333 | 1 | 31223.72  |
| 403.1151 | 1 | 46981.47  |
| 443.1461 | 1 | 18364.74  |
| 783.2412 | 1 | 115923.51 |
| 784.2443 | 1 | 55489.42  |
| 785.2467 | 1 | 14720.78  |
| 823.2723 | 1 | 99211.97  |
| 824.2753 | 1 | 45365.66  |
| 863.3028 | 1 | 25991.62  |

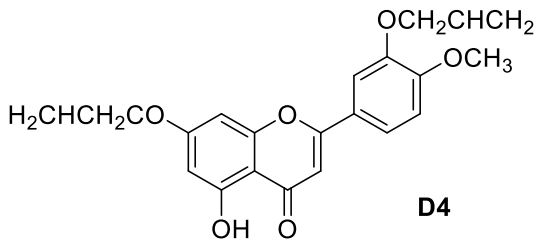

--- End Of Report ---

# MS

|               |          |             |                      |                 |              |                        |                       |
|---------------|----------|-------------|----------------------|-----------------|--------------|------------------------|-----------------------|
| Sample Name   | 0-DDAI   | Position    | P2-A9                | Instrument Name | Instrument 1 | User Name              |                       |
| Inj Vol       | 2        | InjPosition |                      | SampleType      | Sample       | IRM Calibration Status | Success               |
| Data Filename | 0-DDAI.d | ACQ Method  | Cot ngan - MSMS_Pos. | Comment         |              | Acquired Time          | 04/08/2020 7:06:30 PM |

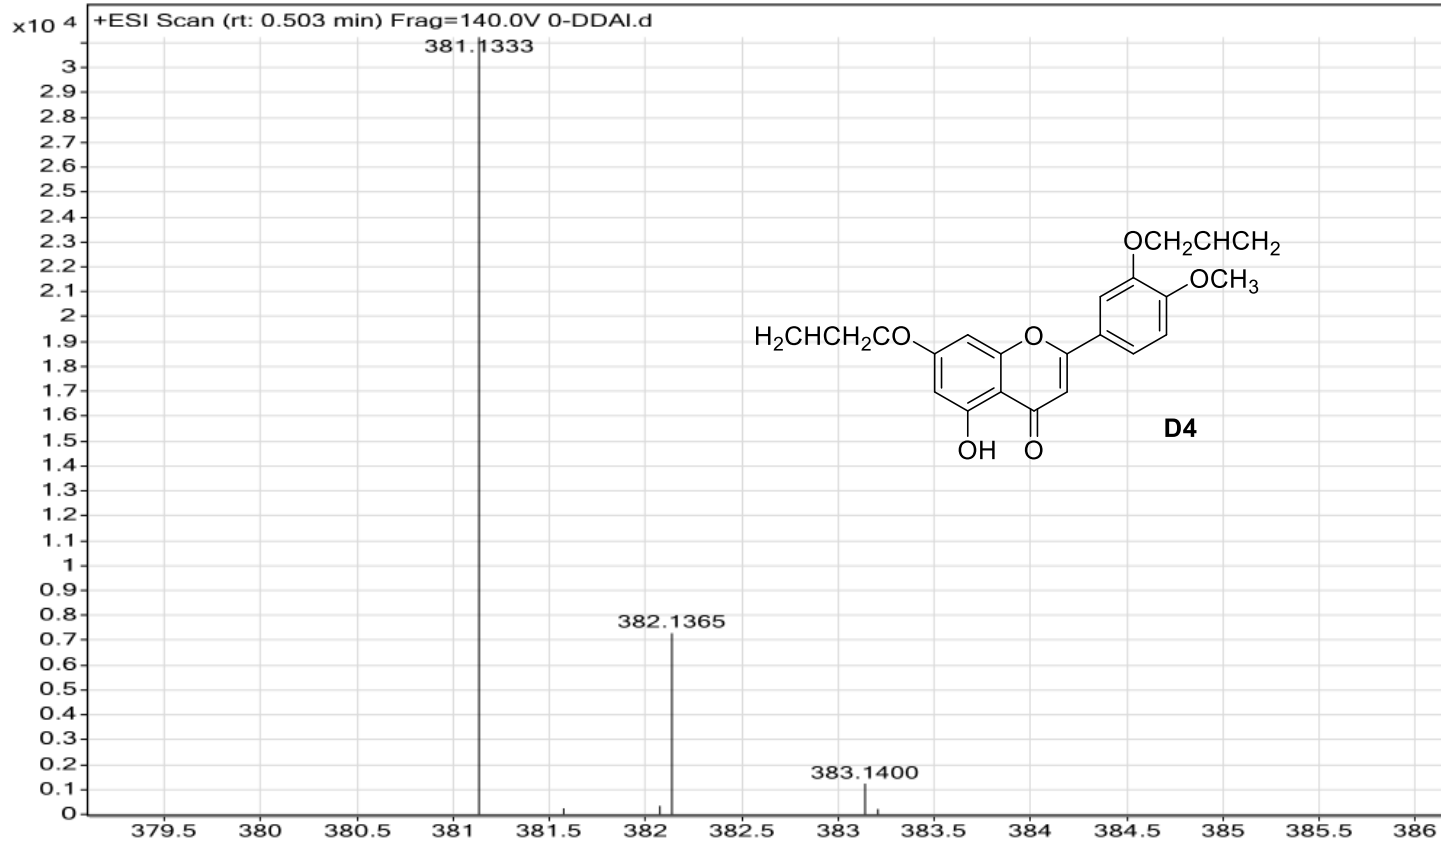

# <sup>1</sup>H-NMR

DDAL-DMSO-1H

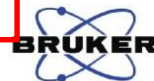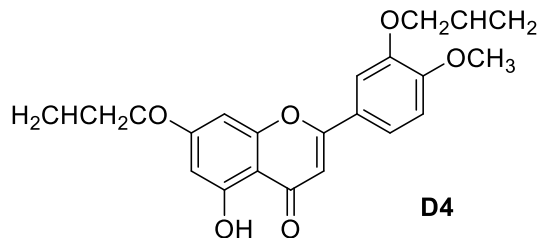

Current Data Parameters  
NAME 110HUAN\_DDAC  
EXPNO 10  
PROCNO 1

F2 - Acquisition Parameters  
Date\_ 20190422  
Time 16.24  
INSTRUM spect  
PROBHD 5 mm PABBI 1H/  
PULPROG zg30  
TD 65536  
SOLVENT DMSO  
NS 16  
DS 2  
SWH 10000.000 Hz  
FIDRES 0.152588 Hz  
AQ 3.2767999 sec  
RG 142.98  
DW 50.000 usec  
DE 6.50 usec  
TE 304.3 K  
DI 1.00000000 sec  
TDO 1

===== CHANNEL f1 =====  
SFO1 500.2049890 MHz  
NUC1 1H  
P1 7.90 usec  
PLW1 13.19999981 W

F2 - Processing parameters  
SI 65536  
SF 500.2019051 MHz  
WDW EM  
SSB 0  
LB 0.30 Hz  
GB 0  
PC 1.00

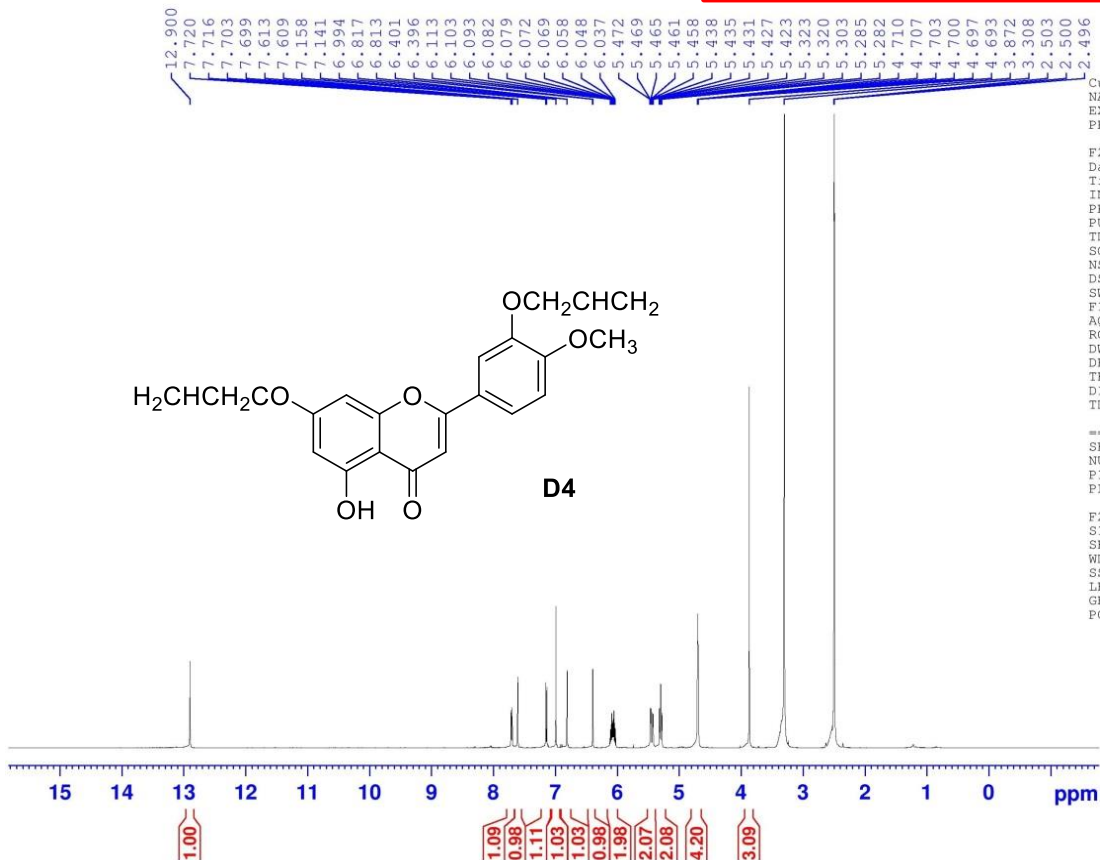

DDAL-DMSO-1H

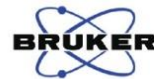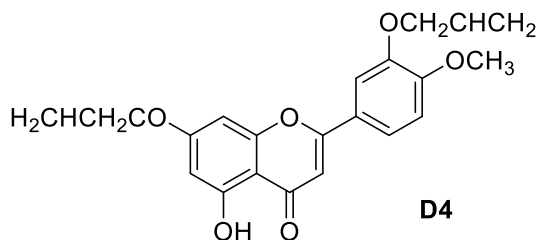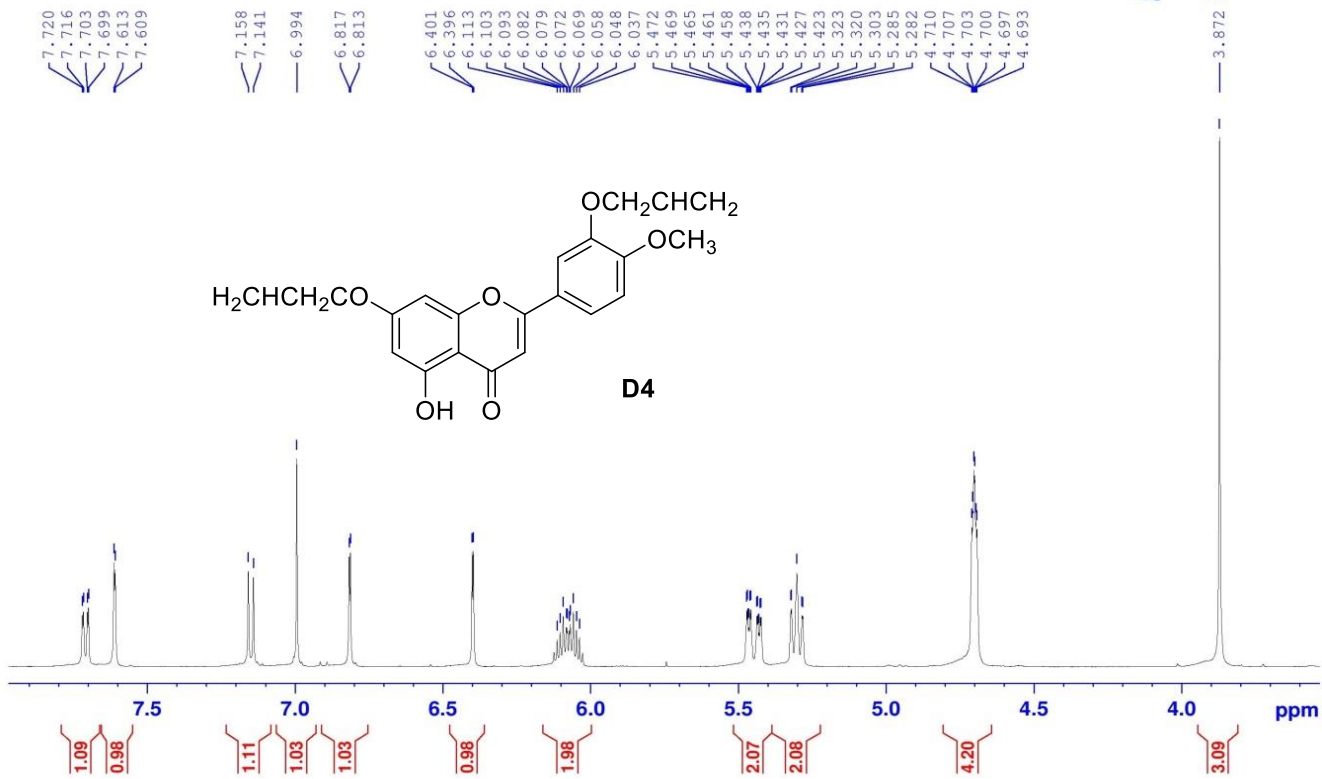

DDAL-DMSO-C13CPD

**<sup>13</sup>C-NMR**

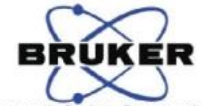

Current Data Parameters  
 NAME 110HUAN\_DDAC  
 EXPNO 2  
 PROCNO 1

F2 - Acquisition Parameters  
 Date\_ 20190422  
 Time 18.15  
 INSTRUM spect  
 PROBHD 5 mm PABBI 1H/  
 PULPROG zgpg30  
 TD 65536  
 SOLVENT DMSO  
 NS 2048  
 DS 4  
 SWH 31250.000 Hz  
 FIDRES 0.476837 Hz  
 AQ 1.0485760 sec  
 RG 198.57  
 DW 16.000 usec  
 DE 6.50 usec  
 TE 304.6 K  
 D1 2.00000000 sec  
 D11 0.03000000 sec  
 TD0 1

==== CHANNEL f1 =====  
 SFO1 125.7897032 MHz  
 NUC1 13C  
 P1 15.40 usec  
 PLW1 81.00000000 W

==== CHANNEL f2 =====  
 SFO2 500.2039008 MHz  
 NUC2 1H  
 CPDPRG[2] waltz16  
 PCPD2 80.00 usec  
 PLW2 13.19999981 W  
 PLW12 0.12872000 W  
 PLW13 0.08238100 W

F2 - Processing parameters  
 SI 32768  
 SF 125.7759348 MHz  
 WDW EM  
 SSB 0  
 LB 1.00 Hz  
 GB 0  
 PC 1.40

- 181.92
- 164.01
- 163.53
- 161.14
- 157.16
- 152.52
- 147.78
- 133.56
- 132.77
- 122.65
- 120.36
- 118.05
- 117.86
- 111.97
- 111.09
- 104.75
- 103.95
- 98.42
- 93.42

- 69.23
- 68.91
- 55.79
- 40.01
- 39.84
- 39.67
- 39.50
- 39.34
- 39.17
- 39.00

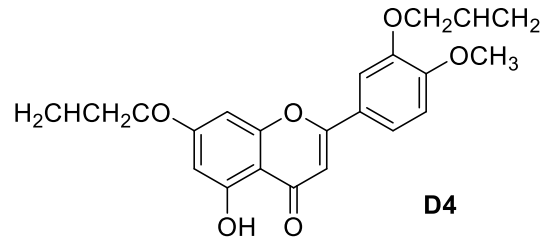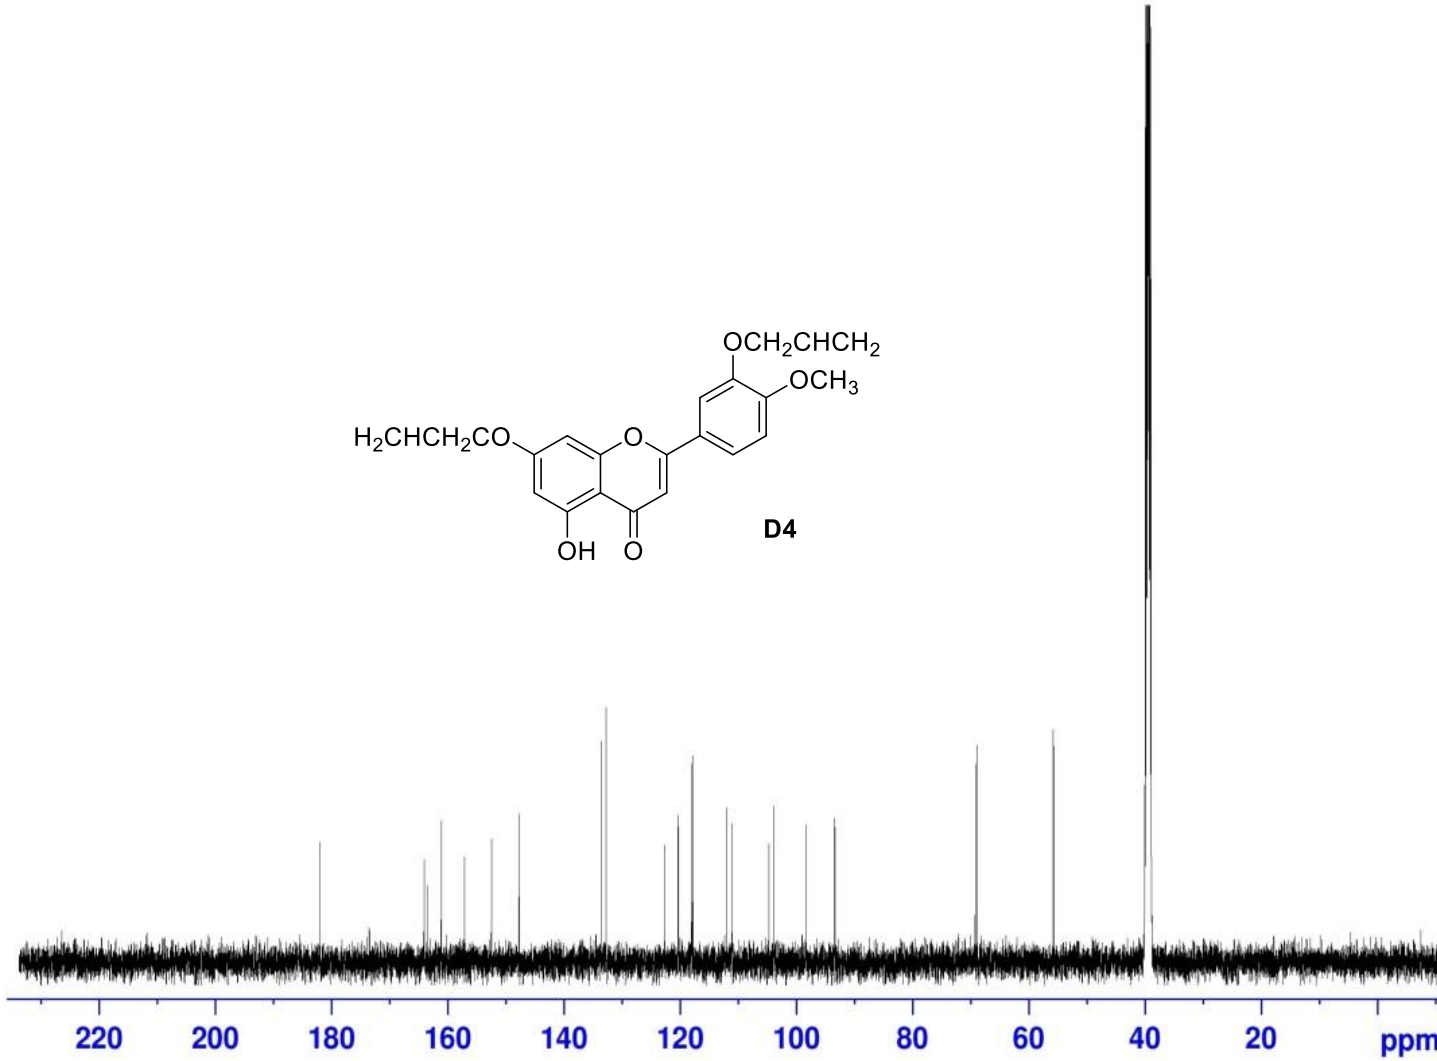

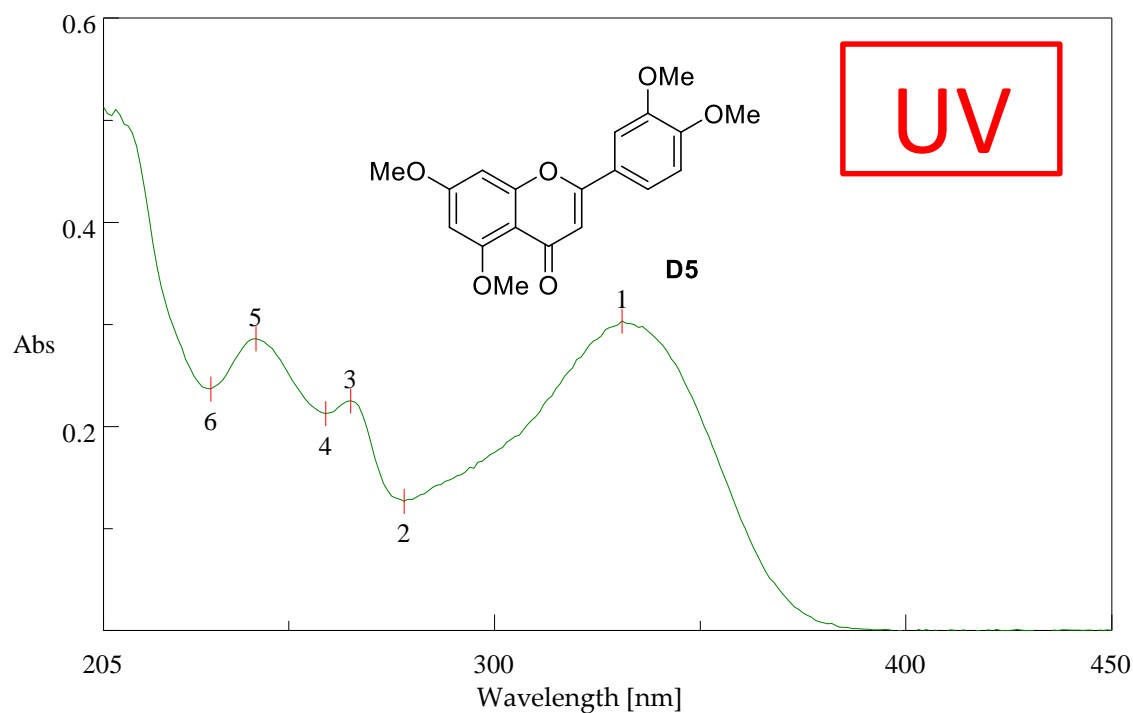

[ Result of Peak Picking ]

| No. | Position | Intensity | No. | Position | Intensity | No. | Position | Intensity |
|-----|----------|-----------|-----|----------|-----------|-----|----------|-----------|
| 1   | 331      | 0.303043  | 2   | 278      | 0.12678   | 3   | 265      | 0.224947  |
| 4   | 259      | 0.212534  | 5   | 242      | 0.286019  | 6   | 231      | 0.236756  |

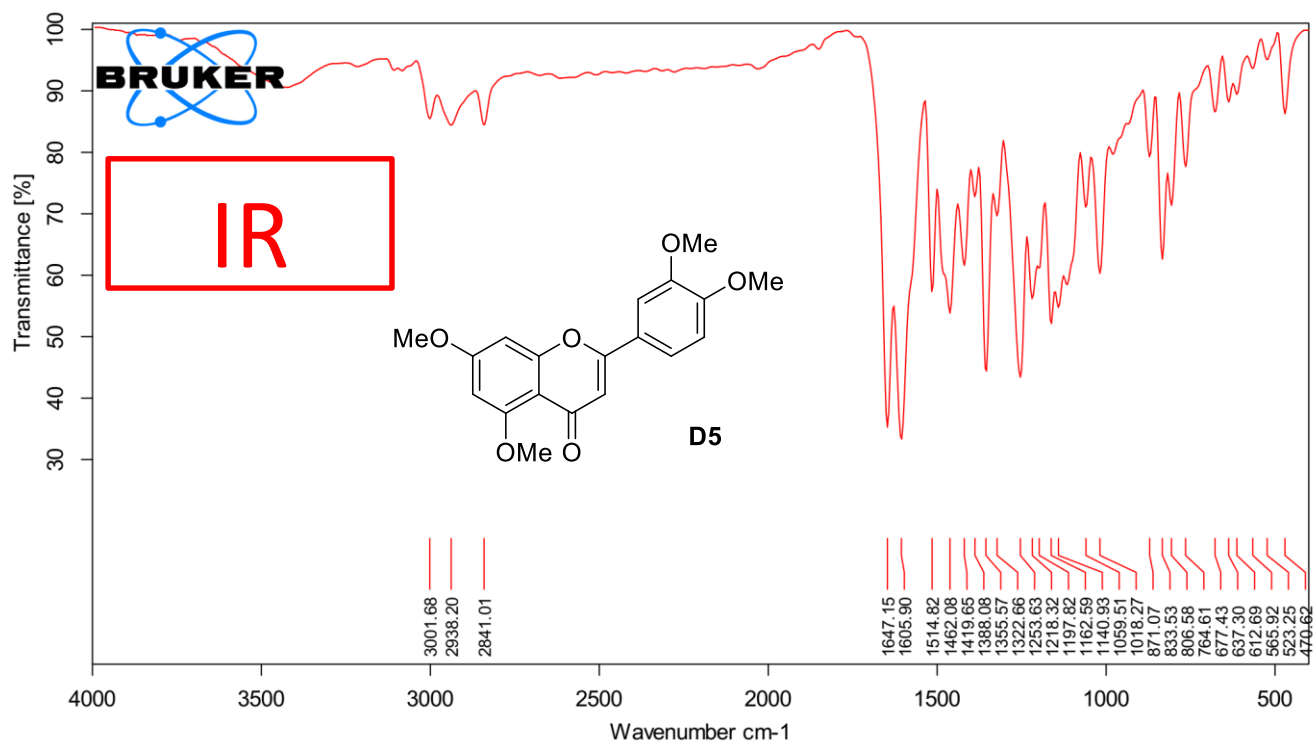



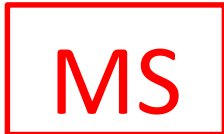

## Qualitative Analysis Report

**Data Filename** 3 DTM.d **Sample Name** 3 DTM  
**Sample Type** Sample **Position** P2-C4  
**Instrument Name** Instrument 1 **User Name**  
**Acq Method** Cot ngan - MSMS\_Pos.m **Acquired Time** 04/08/2020 8:18:51 PM  
**IRM Calibration Status** Success **DA Method** COTNGAN.M.m  
**Comment**  
**Sample Group** **Info.**  
**Stream Name** LC 1 **Acquisition SW** 6200 series TOF/6500 series  
**Version** Q-TOF B.06.01 (B6172 SP1)

### User Chromatograms

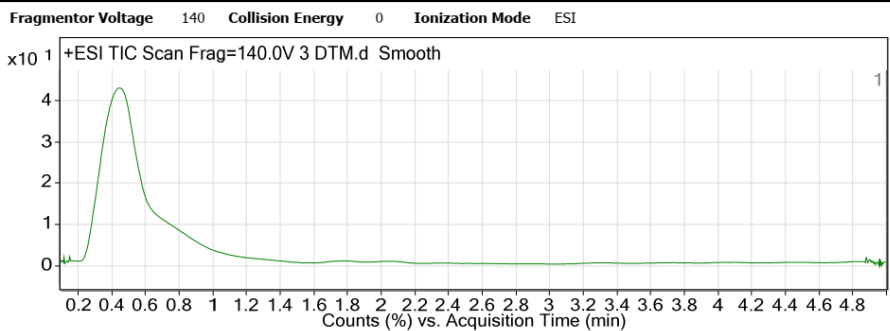

### User Spectra

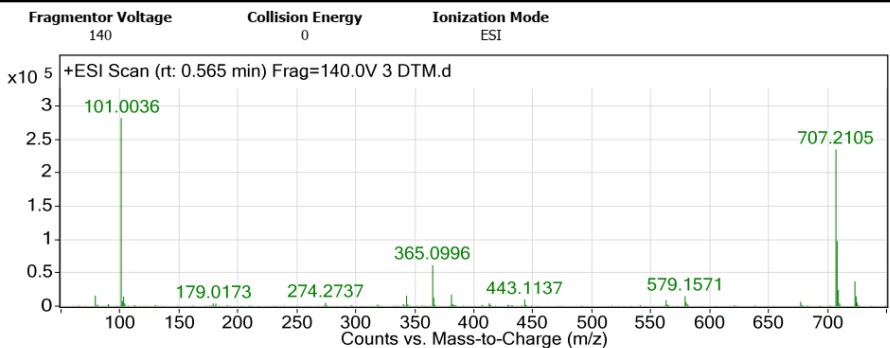

### Peak List

| m/z      | z | Abund     |
|----------|---|-----------|
| 101.0036 | 1 | 281893.06 |
| 365.0996 | 1 | 61498.7   |
| 381.0737 | 1 | 17344.12  |
| 707.2105 | 1 | 234806.06 |
| 708.2135 | 1 | 97507.42  |
| 709.2158 | 1 | 24530     |
| 723.1833 | 1 | 37419.95  |
| 755.2456 | 1 | 17528.59  |
| 905.2926 | 1 | 62656.96  |
| 906.296  | 1 | 37812.45  |

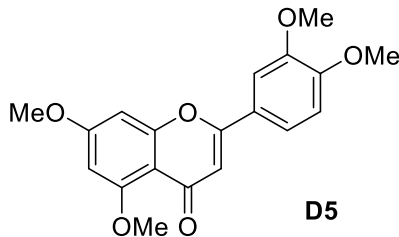

--- End Of Report ---

# MS

|               |         |             |                      |                 |              |                        |                       |
|---------------|---------|-------------|----------------------|-----------------|--------------|------------------------|-----------------------|
| Sample Name   | 3 DTM   | Position    | P2-C4                | Instrument Name | Instrument 1 | User Name              |                       |
| Inj Vol       | 2       | InjPosition |                      | SampleType      | Sample       | IRM Calibration Status | Success               |
| Data Filename | 3 DTM.d | ACQ Method  | Cot ngan - MSMS_Pos. | Comment         |              | Acquired Time          | 04/08/2020 8:18:51 PM |

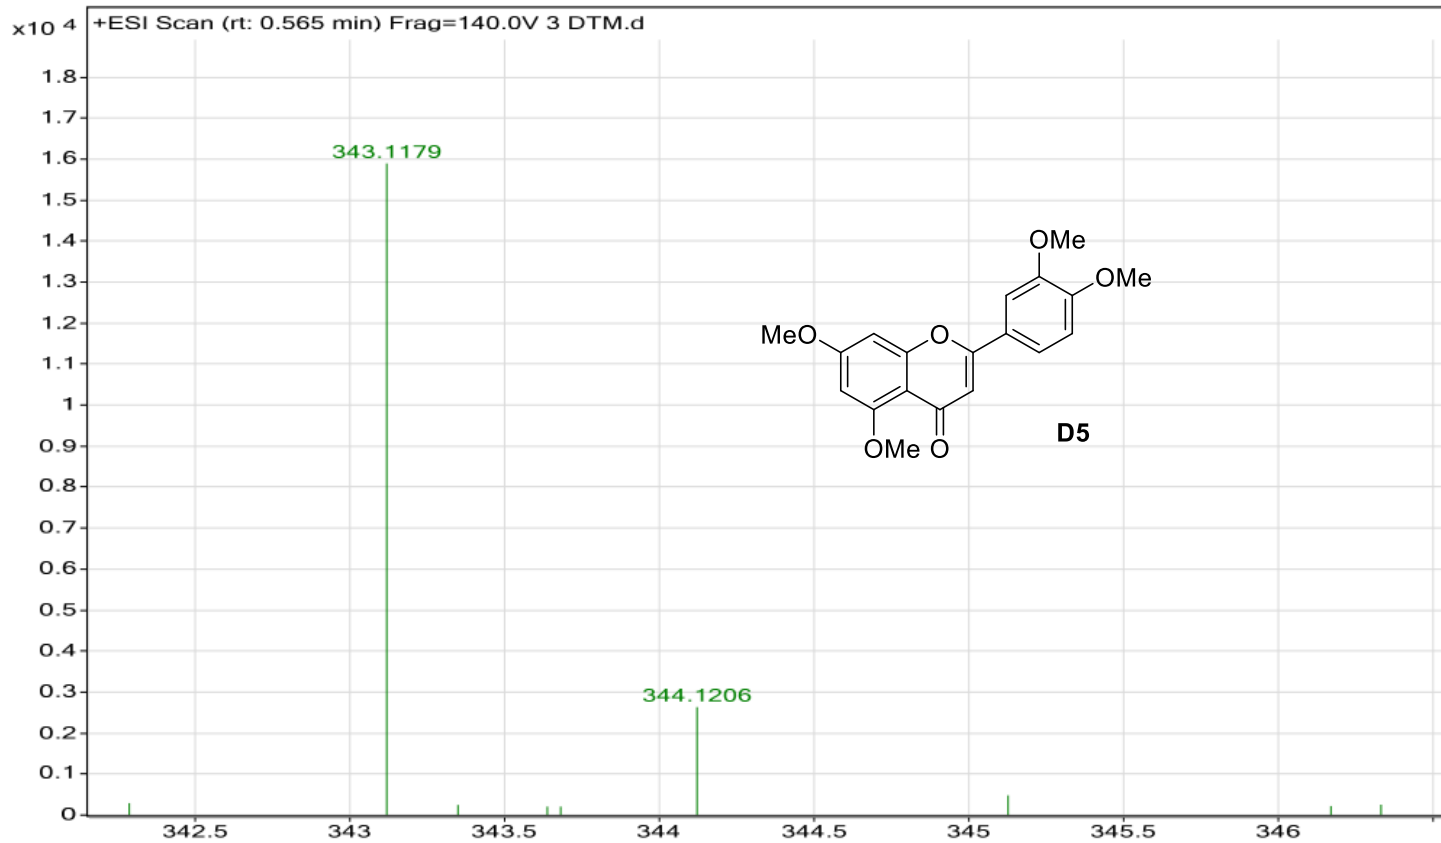

# <sup>1</sup>H-NMR

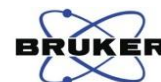

DTM-DMSO-1H

7.625  
7.621  
7.608  
7.604  
7.511  
7.507  
7.093  
7.076  
6.837  
6.833  
6.743  
6.480  
6.476

3.897  
3.877  
3.837  
3.824  
3.322  
2.501

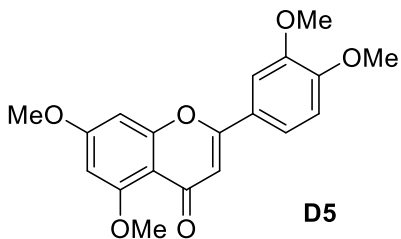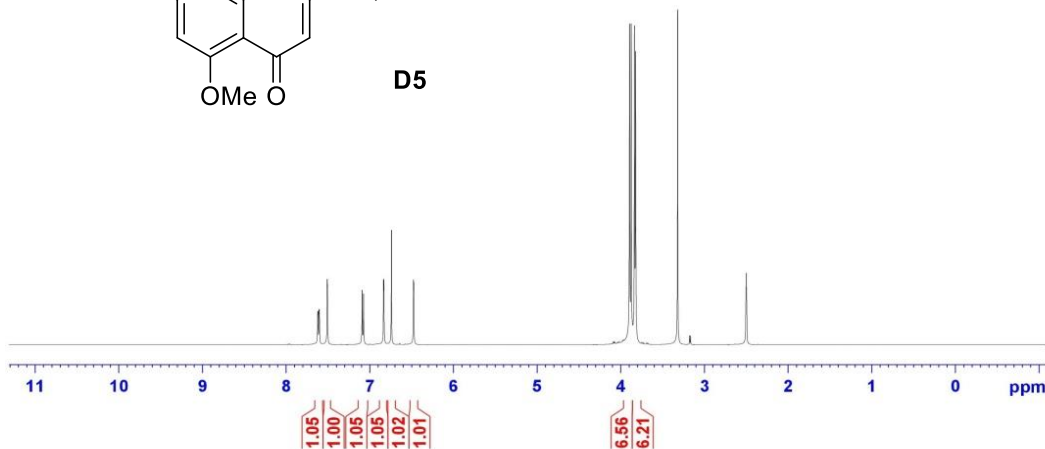

Current Data Parameters  
NAME 110HUAN\_HD4  
EXPNO 1  
PROCNO 1

F2 - Acquisition Parameters  
Date\_ 20190129  
Time 11.47  
INSTRUM spect  
PROBHD 5 mm PABBO BB/  
PULPROG zg30  
TD 65536  
SOLVENT DMSO  
NS 16  
DS 2  
SWH 10000.000 Hz  
FIDRES 0.152588 Hz  
AQ 3.2767999 sec  
RG 89.63  
DW 50.000 usec  
DE 6.50 usec  
TE 301.6 K  
D1 1.0000000 sec  
TDO 1

===== CHANNEL f1 =====  
SFO1 500.2030889 MHz  
NUC1 1H  
P1 10.00 usec  
PLW1 22.00000000 W

F2 - Processing parameters  
SI 65536  
SF 500.2000036 MHz  
WDW EM  
SSB 0  
LB 0.30 Hz  
GB 0  
PC 1.00

DTM-DMSO-1H

7.625  
7.621  
7.608  
7.604  
7.511  
7.507

7.093  
7.076  
6.837  
6.833  
6.743  
6.480  
6.476

3.897  
3.877  
3.837  
3.824

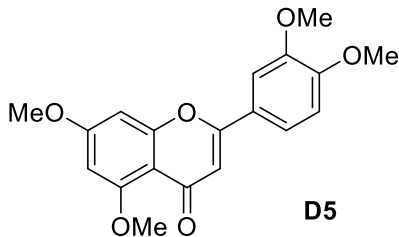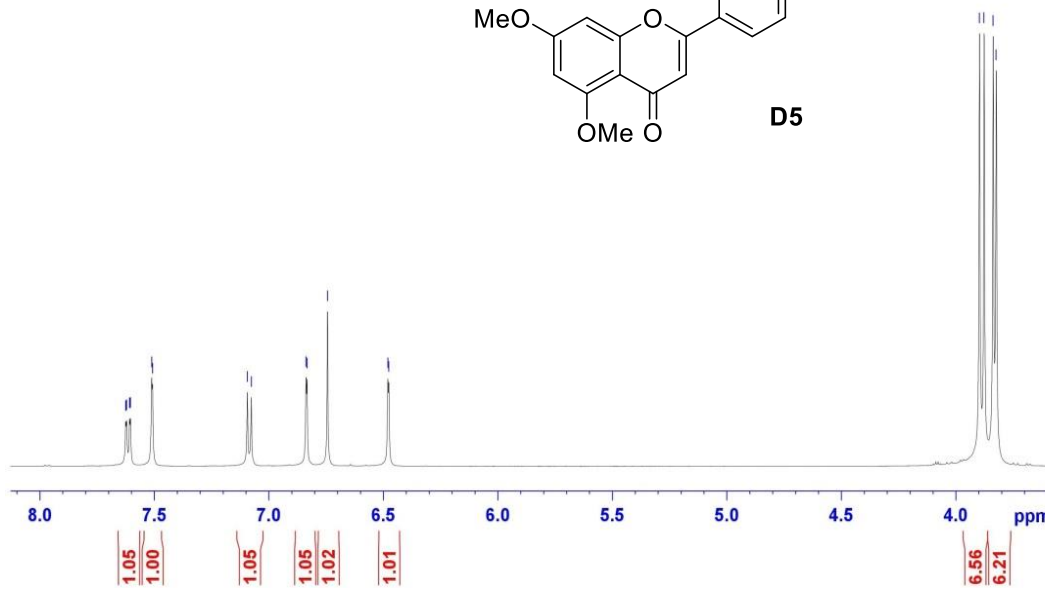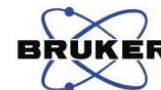

Current Data Parameters  
NAME 110HUAN\_HD4  
EXPNO 1  
PROCNO 1

F2 - Acquisition Parameters  
Date\_ 20190129  
Time 11.47  
INSTRUM spect  
PROBHD 5 mm PABBO BB/  
PULPROG zg30  
TD 65536  
SOLVENT DMSO  
NS 16  
DS 2  
SWH 10000.000 Hz  
FIDRES 0.152588 Hz  
AQ 3.2767999 sec  
RG 89.63  
DW 50.000 usec  
DE 6.50 usec  
TE 301.6 K  
D1 1.0000000 sec  
TDO 1

===== CHANNEL f1 =====  
SFO1 500.2030889 MHz  
NUC1 1H  
P1 10.00 usec  
PLW1 22.00000000 W

F2 - Processing parameters  
SI 65536  
SF 500.2000036 MHz  
WDW EM  
SSB 0  
LB 0.30 Hz  
GB 0  
PC 1.00

DTM-DMSO-1H

# <sup>1</sup>H-NMR

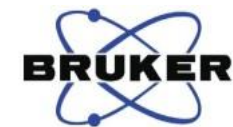

7.625  
7.621  
7.608  
7.604

7.511  
7.507

7.093  
7.076

6.837  
6.833

6.743

6.480  
6.476

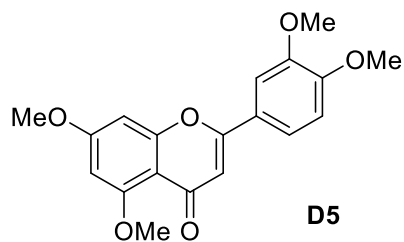

Current Data Parameters  
NAME 110HJAN\_HD4  
EXPNO 1  
PROCNO 1

F2 - Acquisition Parameters  
Date\_ 20190129  
Time 11.47  
INSTRUM spect  
PROBHD 5 mm PABBO BB/  
PULPROG zg30  
TD 65536  
SOLVENT DMSO  
NS 16  
DS 2  
SWH 10000.000 Hz  
FIDRES 0.152588 Hz  
AQ 3.2767999 sec  
RG 89.63  
DW 50.000 usec  
DE 6.50 usec  
TE 301.6 K  
D1 1.0000000 sec  
TD0 1

===== CHANNEL f1 =====  
SFO1 500.2030889 MHz  
NUC1 1H  
P1 10.00 usec  
PLW1 22.00000000 W

F2 - Processing parameters  
SI 65536  
SF 500.2000036 MHz  
WDW EM  
SSB 0  
LB 0.30 Hz  
GB 0  
PC 1.00

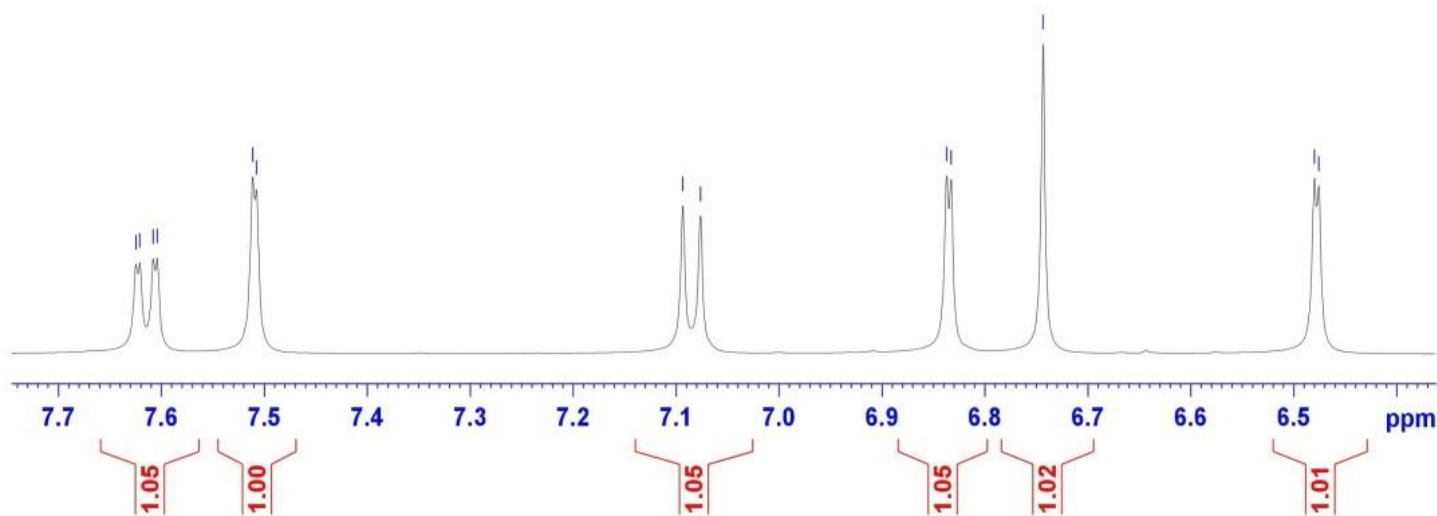

DTM-DMSO-C13CPD

**<sup>13</sup>C-NMR**

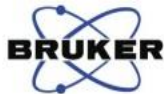

— 175.62  
 — 163.54  
 — 160.17  
 — 159.59  
 — 159.08  
 — 151.51  
 — 148.95

— 123.09  
 — 119.20  
 — 111.54  
 — 109.01  
 — 108.25  
 — 106.99  
 — 96.09  
 — 93.30

55.95  
 55.87  
 55.78  
 55.61  
 40.01  
 39.84  
 39.67  
 39.51  
 39.34  
 39.17  
 39.00

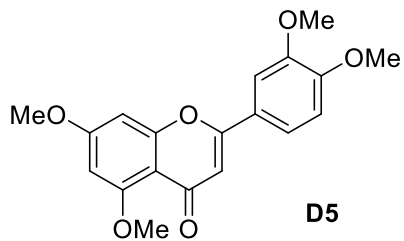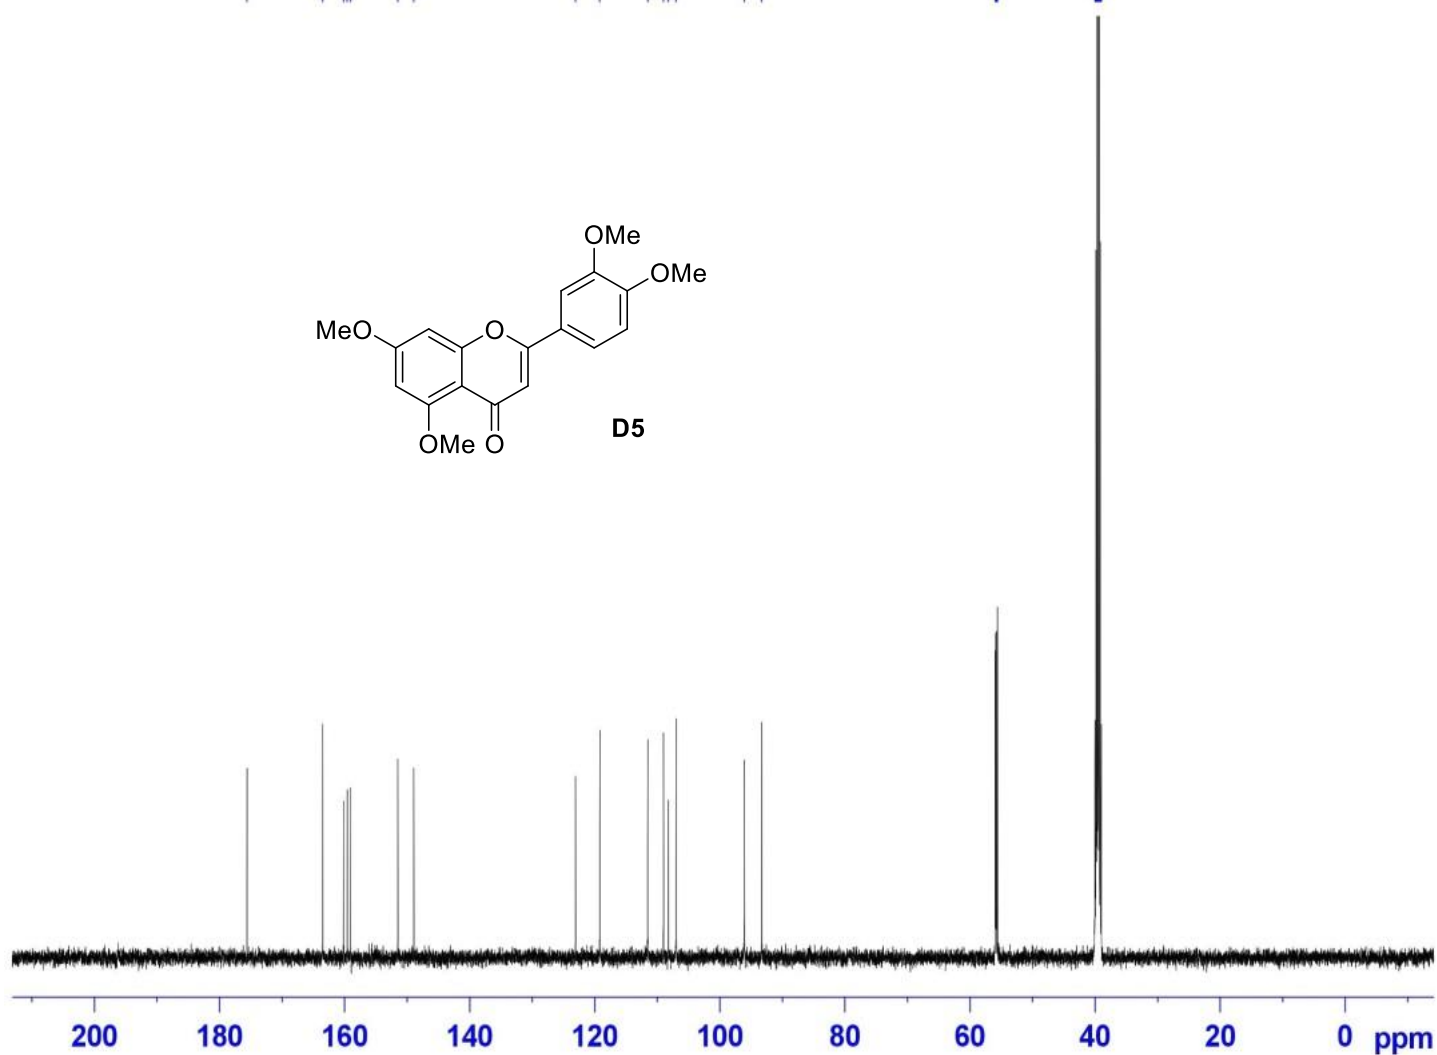

Current Data Parameters  
 NAME 110HUAN\_HD4  
 EXPNO 2  
 PROCNO 1

F2 - Acquisition Parameters  
 Date\_ 20190129  
 Time\_ 17.49  
 INSTRUM spect  
 PROBHD 5 mm PABBO BB/  
 PULPROG zgpg30  
 TD 65536  
 SOLVENT DMSO  
 NS 128  
 DS 4  
 SWH 29761.904 Hz  
 FIDRES 0.454131 Hz  
 AQ 1.1010048 sec  
 RG 198.57  
 DW 16.800 usec  
 DE 6.50 usec  
 TE 302.3 K  
 D1 2.0000000 sec  
 D11 0.03000000 sec  
 TD0 1

==== CHANNEL f1 =====  
 SFO1 125.7879670 MHz  
 NUC1 13C  
 P1 10.00 usec  
 PLW1 88.00000000 W

==== CHANNEL f2 =====  
 SFO2 500.2020008 MHz  
 NUC2 1H  
 CPDPRG[2] waltz16  
 PCPD2 80.00 usec  
 PLW2 22.00000000 W  
 PLW12 0.34375000 W  
 PLW13 0.22000000 W

F2 - Processing parameters  
 SI 32768  
 SF 125.7754541 MHz  
 WDW EM  
 SSB 0  
 LB 1.00 Hz  
 GB 0  
 PC 1.40

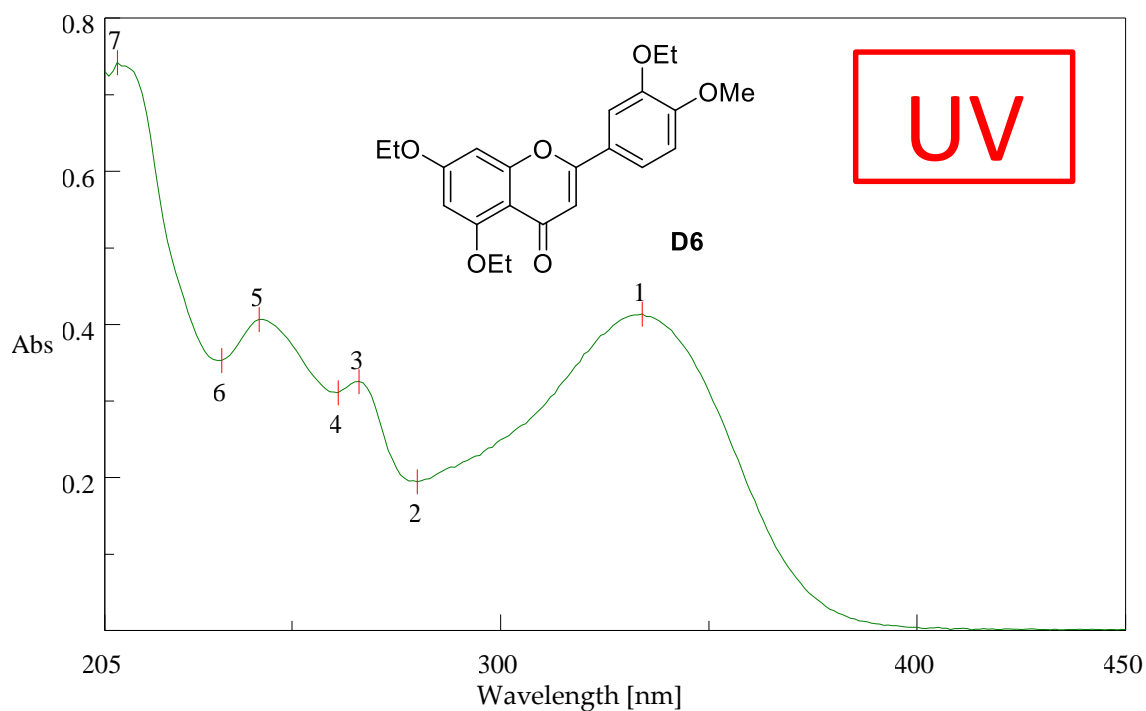

[ Result of Peak Picking ]

| No. | Position | Intensity | No. | Position | Intensity | No. | Position | Intensity |
|-----|----------|-----------|-----|----------|-----------|-----|----------|-----------|
| 1   | 334      | 0.413532  | 2   | 280      | 0.19431   | 3   | 266      | 0.325215  |
| 4   | 261      | 0.310755  | 5   | 242      | 0.406389  | 6   | 233      | 0.352706  |
| 7   | 208      | 0.741798  |     |          |           |     |          |           |

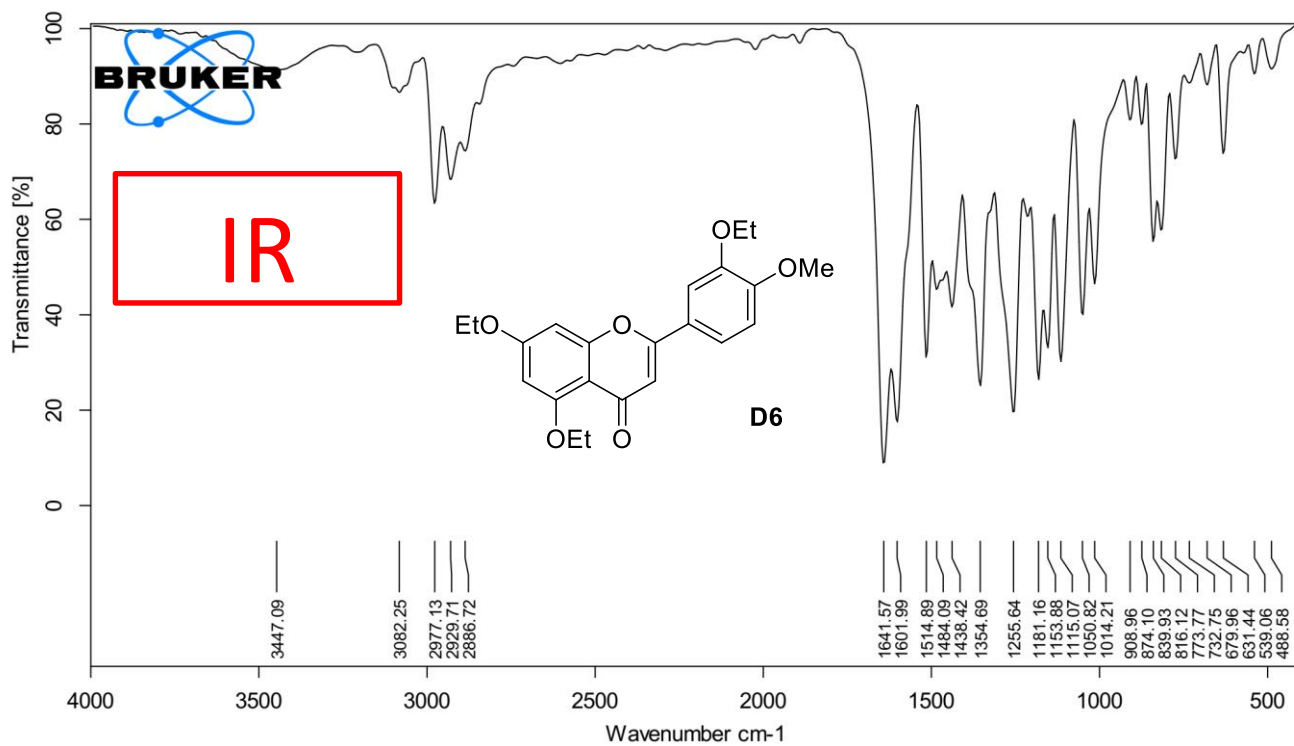

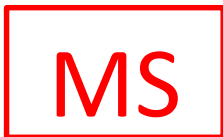

## Qualitative Analysis Report

**Data Filename** 5-DTE.d **Sample Name** 5-DTE  
**Sample Type** Sample **Position** P2-B4  
**Instrument Name** Instrument 1 **User Name**  
**Acq Method** Cot ngan - MSMS\_Pos.m **Acquired Time** 04/08/2020 7:28:45 PM  
**IRM Calibration Status** Success **DA Method** COTNGAN.M.m  
**Comment**  
**Sample Group** **Info.**  
**Stream Name** LC 1 **Acquisition SW** 6200 series TOF/6500 series  
**Version** Q-TOF B.06.01 (B6172 SP1)

### User Chromatograms

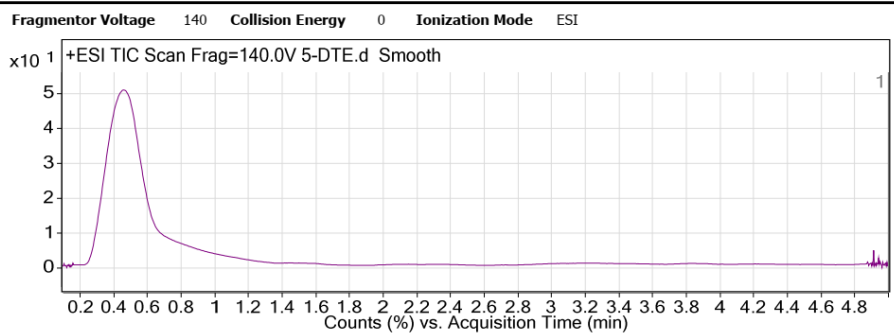

### User Spectra

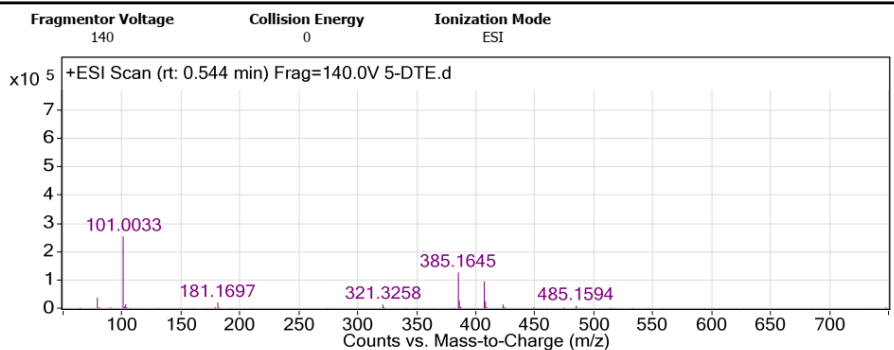

#### Peak List

| m/z      | z | Abund     |
|----------|---|-----------|
| 79.0211  | 1 | 37639.98  |
| 101.0033 | 1 | 252987.19 |
| 385.1645 | 1 | 126322.29 |
| 407.1463 | 1 | 94535.22  |
| 791.3043 | 1 | 664562.75 |
| 791.4165 | 1 | 43104.09  |
| 792.3076 | 1 | 319582.63 |
| 793.3099 | 1 | 90412.51  |
| 807.2774 | 1 | 135345.67 |
| 808.2803 | 1 | 61167.45  |

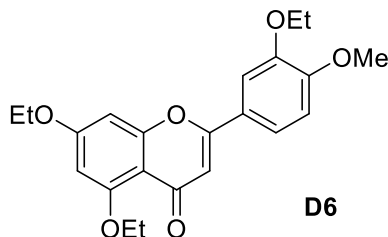

--- End Of Report ---

# MS

|               |         |             |                      |                 |              |                        |                       |
|---------------|---------|-------------|----------------------|-----------------|--------------|------------------------|-----------------------|
| Sample Name   | 5-DTE   | Position    | P2-B4                | Instrument Name | Instrument 1 | User Name              |                       |
| Inj Vol       | 2       | InjPosition |                      | SampleType      | Sample       | IRM Calibration Status | Success               |
| Data Filename | 5-DTE.d | ACQ Method  | Cot ngan - MSMS_Pos. | Comment         |              | Acquired Time          | 04/08/2020 7:28:45 PM |

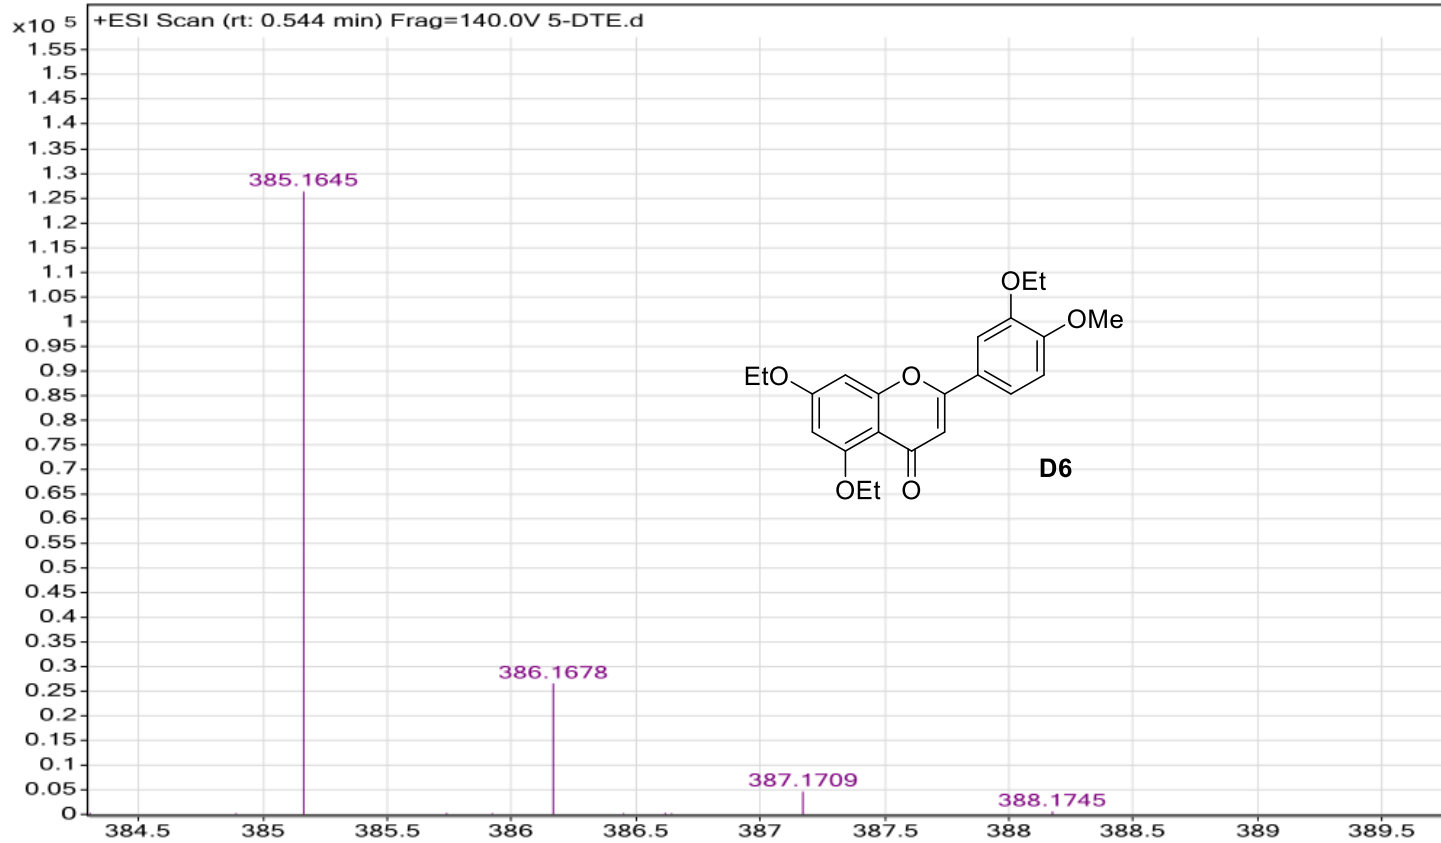



# <sup>1</sup>H-NMR

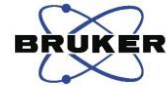

DTE-DMSO-1H

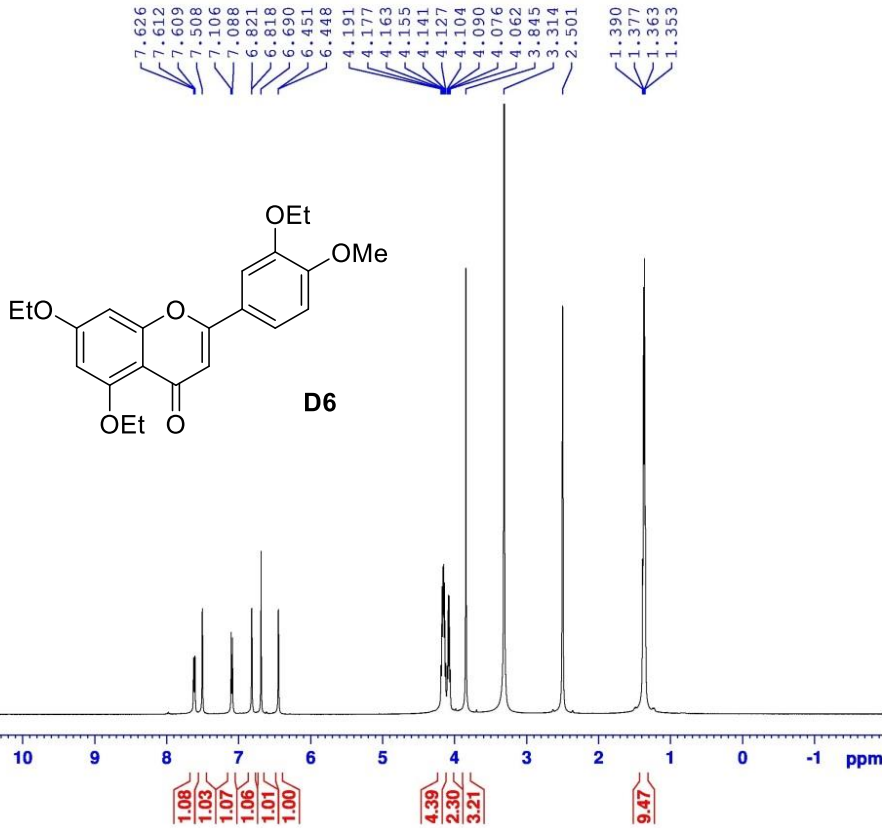

Current Data Parameters  
NAME 110HUAN\_HD5  
EXPNO 1  
PROCNO 1

F2 - Acquisition Parameters  
Date\_ 20190129  
Time 11.43  
INSTRUM spect  
PROBHD 5 mm PABBO BB/  
PULPROG zg30  
TD 65536  
SOLVENT DMSO  
NS 16  
DS 2  
SWH 10000.000 Hz  
FIDRES 0.152588 Hz  
AQ 3.2767999 sec  
RG 111.09  
DW 50.000 usec  
DE 6.50 usec  
TE 301.6 K  
D1 1.0000000 sec  
TD0 1

CHANNEL f1  
SF01 500.2030889 MHz  
NUCL1 1H  
P1 10.00 usec  
PLW1 22.00000000 W

F2 - Processing parameters  
SI 65536  
SF 500.2000033 MHz  
WDW EM  
SSB 0  
LB 0.30 Hz  
GB 0  
PC 1.00

DTE-DMSO-1H

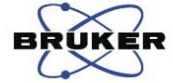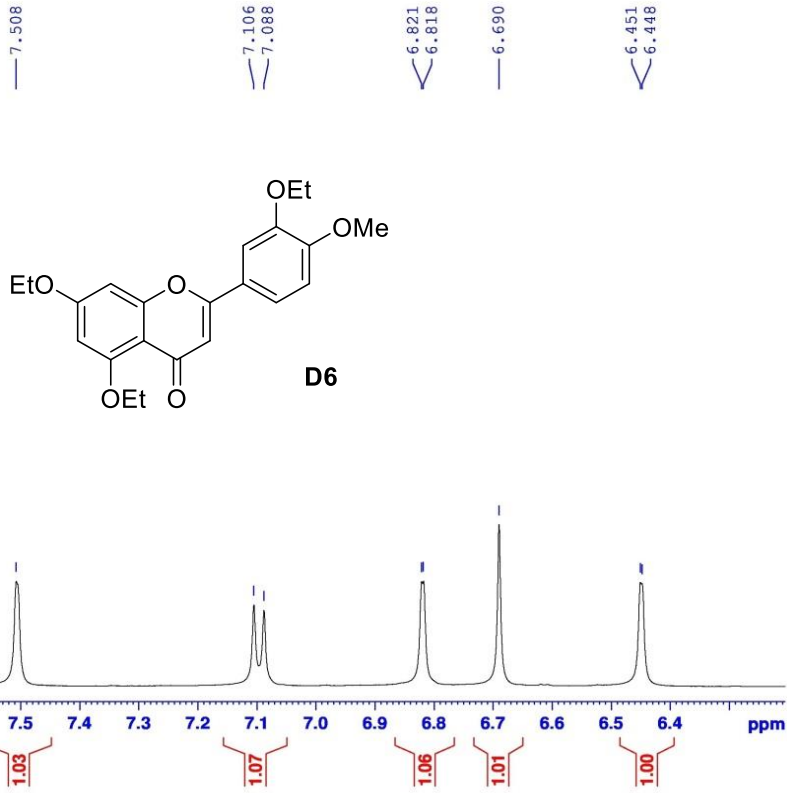

Current Data Parameters  
NAME 110HUAN\_HD5  
EXPNO 1  
PROCNO 1

F2 - Acquisition Parameters  
Date\_ 20190129  
Time 11.43  
INSTRUM spect  
PROBHD 5 mm PABBO BB/  
PULPROG zg30  
TD 65536  
SOLVENT DMSO  
NS 16  
DS 2  
SWH 10000.000 Hz  
FIDRES 0.152588 Hz  
AQ 3.2767999 sec  
RG 111.09  
DW 50.000 usec  
DE 6.50 usec  
TE 301.6 K  
D1 1.0000000 sec  
TD0 1

CHANNEL f1  
SF01 500.2030889 MHz  
NUCL1 1H  
P1 10.00 usec  
PLW1 22.00000000 W

F2 - Processing parameters  
SI 65536  
SF 500.2000033 MHz  
WDW EM  
SSB 0  
LB 0.30 Hz  
GB 0  
PC 1.00

DTE-DMSO-1H

# <sup>1</sup>H-NMR

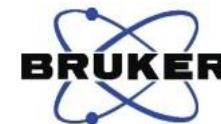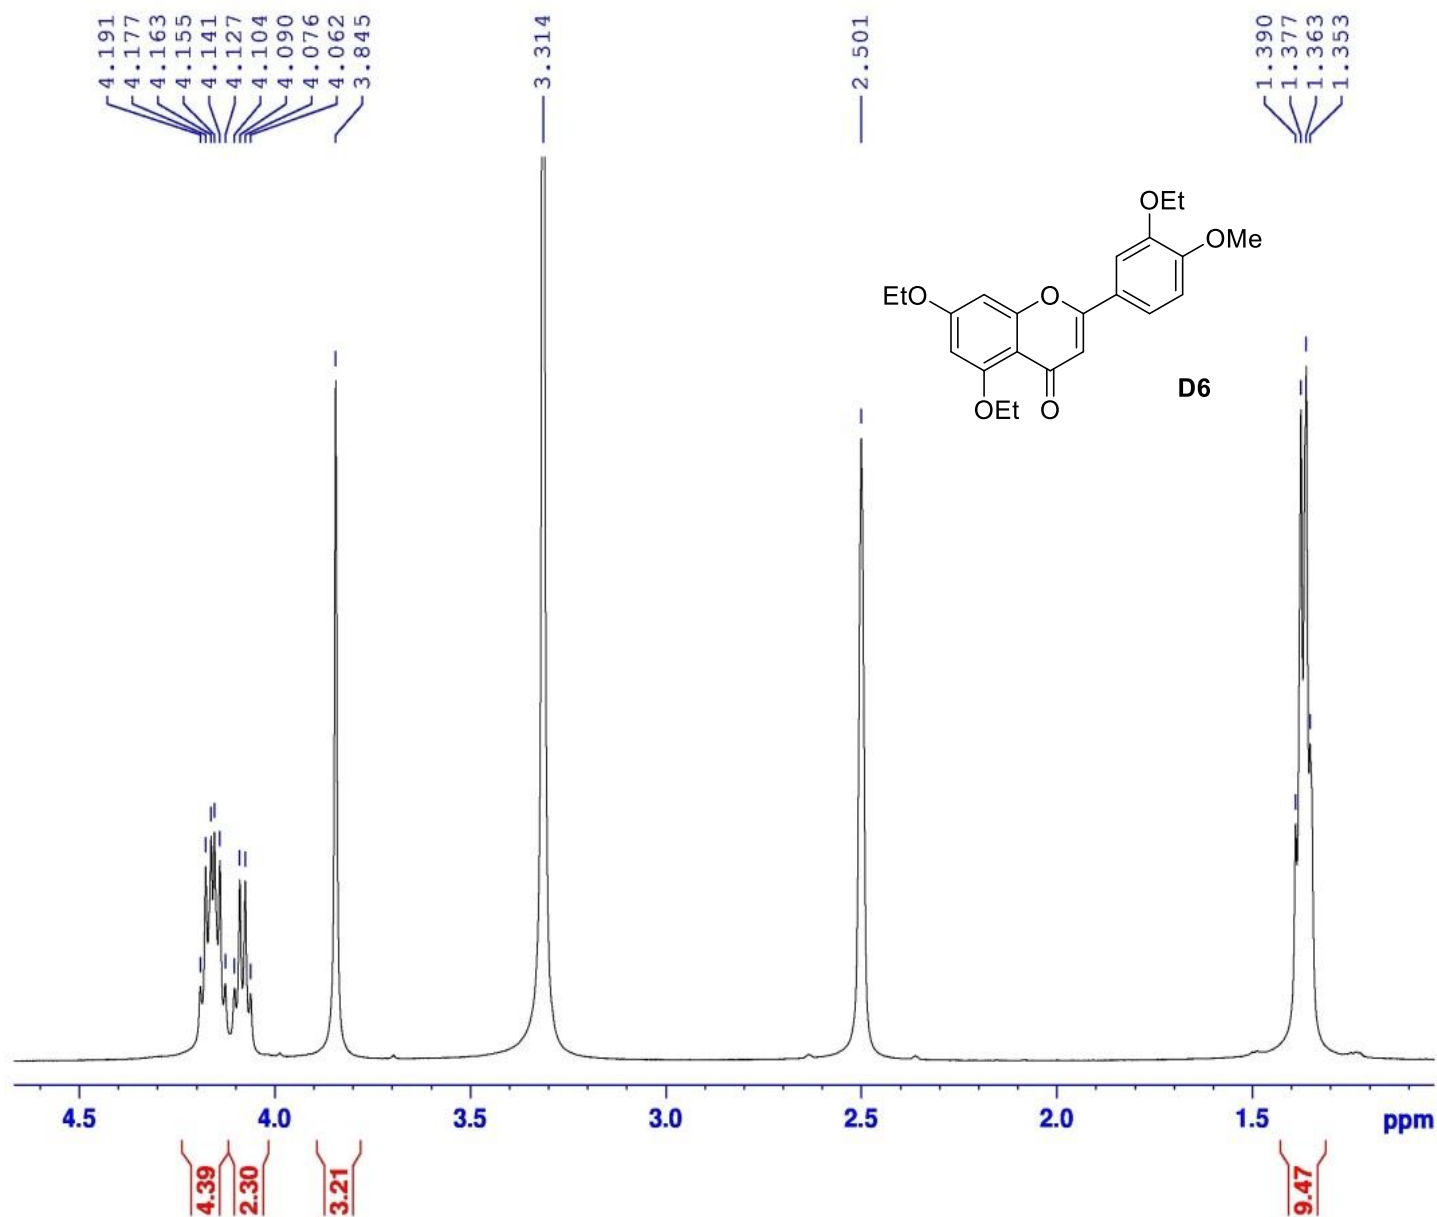

Current Data Parameters  
NAME 110HUAN\_HD5  
EXPNO 1  
PROCNO 1

F2 - Acquisition Parameters  
Date\_ 20190129  
Time 11.43  
INSTRUM spect  
PROBHD 5 mm PABBO BB/  
PULPROG zg30  
TD 65536  
SOLVENT DMSO  
NS 16  
DS 2  
SWH 10000.000 Hz  
FIDRES 0.152588 Hz  
AQ 3.2767999 sec  
RG 111.09  
DW 50.000 usec  
DE 6.50 usec  
TE 301.6 K  
D1 1.00000000 sec  
TD0 1

----- CHANNEL f1 -----  
SFO1 500.2030889 MHz  
NUC1 1H  
P1 10.00 usec  
PLW1 22.00000000 W

F2 - Processing parameters  
SI 65536  
SF 500.2000033 MHz  
WDW EM  
SSB 0  
LB 0.30 Hz  
GB 0  
PC 1.00

DTE-DMSO-C13CPD

**<sup>13</sup>C-NMR**

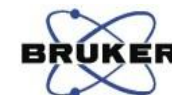

175.54  
 162.68  
 159.45  
 159.39  
 159.07  
 151.61  
 148.15  
  
 123.10  
 119.19  
 111.65  
 109.99  
 108.30  
 106.95  
 97.13  
 93.61  
  
 64.27  
 64.01  
 63.92  
 55.57  
 40.00  
 39.92  
 39.83  
 39.76  
 39.67  
 39.50  
 39.33  
 39.17  
 39.00  
 14.63  
 14.36  
 14.35

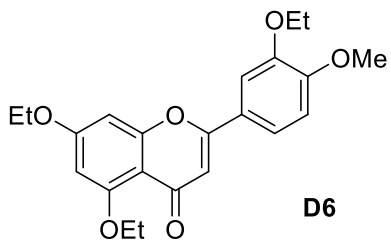

Current Data Parameters  
 NAME 110HUAN\_HD5  
 EXPNO 2  
 PROCNO 1

F2 - Acquisition Parameters  
 Date\_ 20190129  
 Time 17.07  
 INSTRUM spect  
 PROBHD 5 mm PABBO BB/  
 PULPROG zgpg30  
 TD 65536  
 SOLVENT DMSO  
 NS 256  
 DS 4  
 SWH 29761.904 Hz  
 FIDRES 0.454131 Hz  
 AQ 1.1010048 sec  
 RG 198.57  
 DW 16.800 usec  
 DE 6.50 usec  
 TE 302.5 K  
 D1 2.0000000 sec  
 D11 0.03000000 sec  
 TD0 1

==== CHANNEL f1 =====  
 SFO1 125.7879670 MHz  
 NUC1 13C  
 P1 10.00 usec  
 PLW1 88.00000000 W

==== CHANNEL f2 =====  
 SFO2 500.2020008 MHz  
 NUC2 1H  
 CPDPRG[2] waltz16  
 PCPD2 80.00 usec  
 PLW2 22.00000000 W  
 PLW12 0.34375000 W  
 PLW13 0.22000000 W

F2 - Processing parameters  
 SI 32768  
 SF 125.7754556 MHz  
 WDW EM  
 SSB 0  
 LB 1.00 Hz  
 GB 0  
 PC 1.40

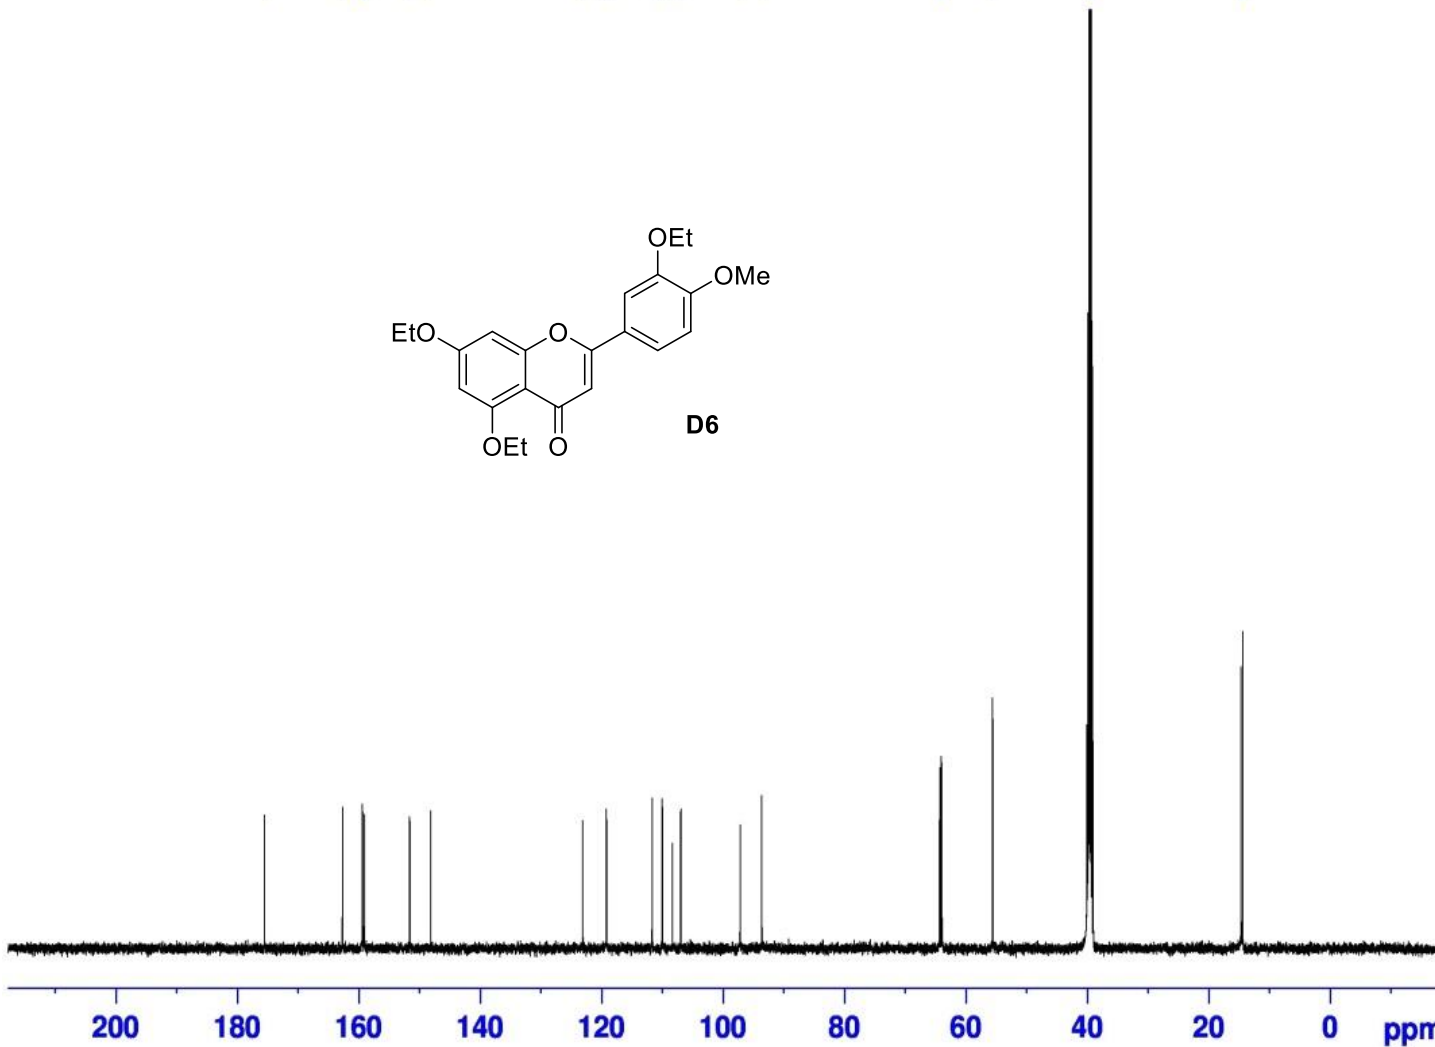

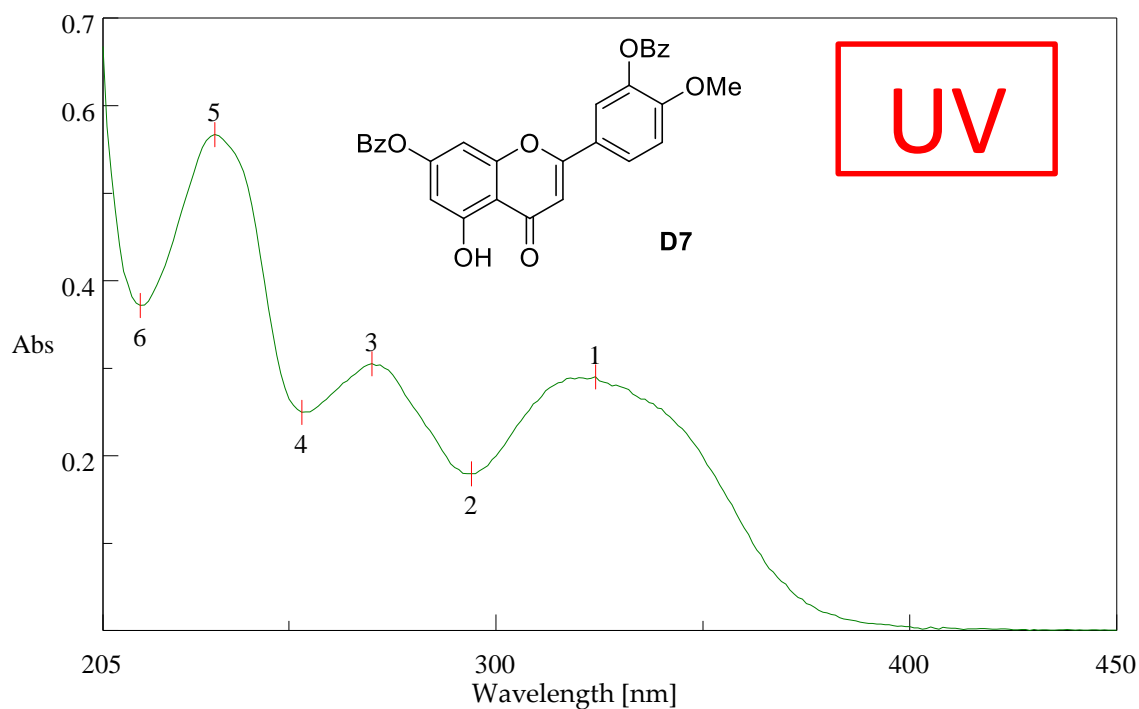

[ Result of Peak Picking ]

| No. | Position | Intensity | No. | Position | Intensity | No. | Position | Intensity |
|-----|----------|-----------|-----|----------|-----------|-----|----------|-----------|
| 1   | 324      | 0.290155  | 2   | 294      | 0.179039  | 3   | 270      | 0.305058  |
| 4   | 253      | 0.249541  | 5   | 232      | 0.566944  | 6   | 214      | 0.371536  |

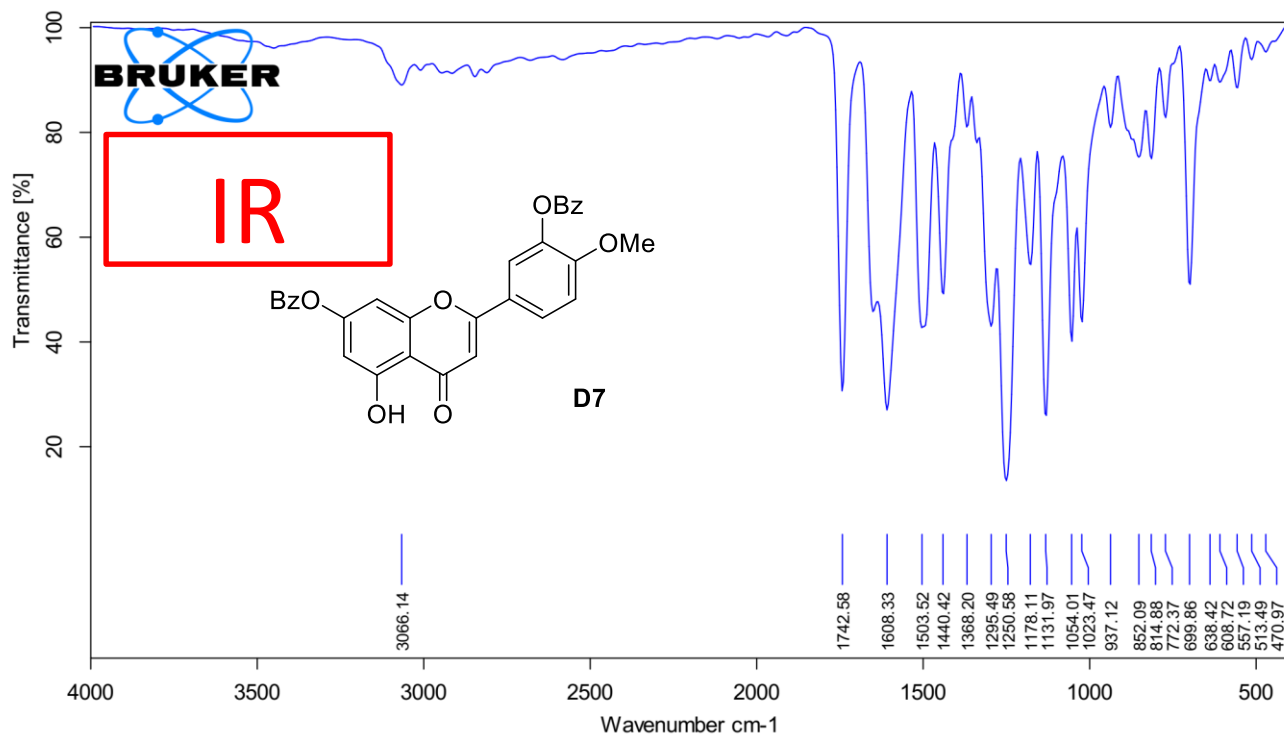

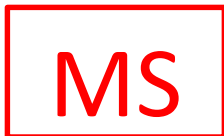

## Qualitative Analysis Report

**Data Filename** 8.DDB.d **Sample Name** 8.DDB  
**Sample Type** Sample **Position** P2-B7  
**Instrument Name** Instrument 1 **User Name**  
**Acq Method** Cot ngan - MSMS\_Pos.m **Acquired Time** 04/08/2020 7:45:28 PM  
**IRM Calibration Status** Success **DA Method** COTNGAN.M.m  
**Comment**  
**Sample Group** **Info.**  
**Stream Name** LC 1 **Acquisition SW** 6200 series TOF/6500 series  
**Version** Q-TOF B.06.01 (B6172 SP1)

### User Chromatograms

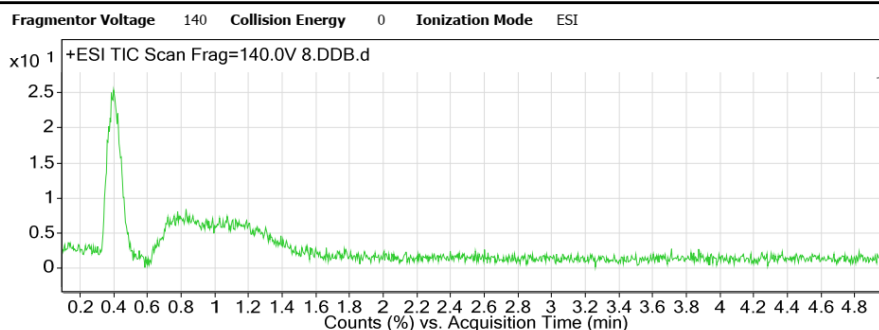

### User Spectra

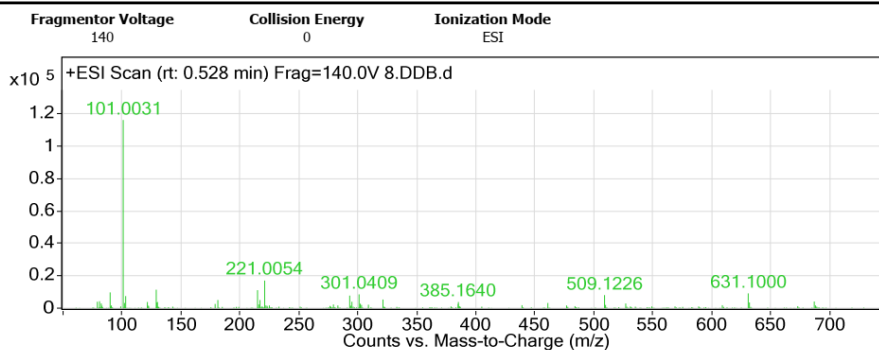

### Peak List

| m/z      | z | Abund     |
|----------|---|-----------|
| 90.0059  | 2 | 9788.28   |
| 101.0031 | 1 | 116298.95 |
| 102.9987 | 1 | 7500.39   |
| 129.0125 | 2 | 11382.23  |
| 214.9812 | 1 | 11176.09  |
| 221.0054 | 1 | 17083.07  |
| 292.9947 | 1 | 7780.54   |
| 301.0409 | 1 | 8574.88   |
| 509.1226 | 1 | 8061.85   |
| 631.1    | 1 | 9216.2    |

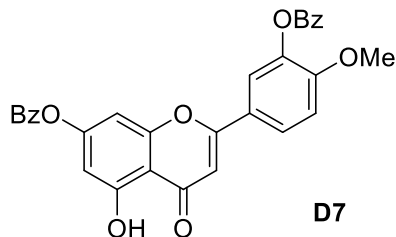

--- End Of Report ---

# MS

|               |         |             |                      |                 |              |                        |                       |
|---------------|---------|-------------|----------------------|-----------------|--------------|------------------------|-----------------------|
| Sample Name   | 8.DDB   | Position    | P2-B7                | Instrument Name | Instrument 1 | User Name              |                       |
| Inj Vol       | 2       | InjPosition |                      | SampleType      | Sample       | IRM Calibration Status | Success               |
| Data Filename | 8.DDB.d | ACQ Method  | Cot ngan - MSMS_Pos. | Comment         |              | Acquired Time          | 04/08/2020 7:45:28 PM |

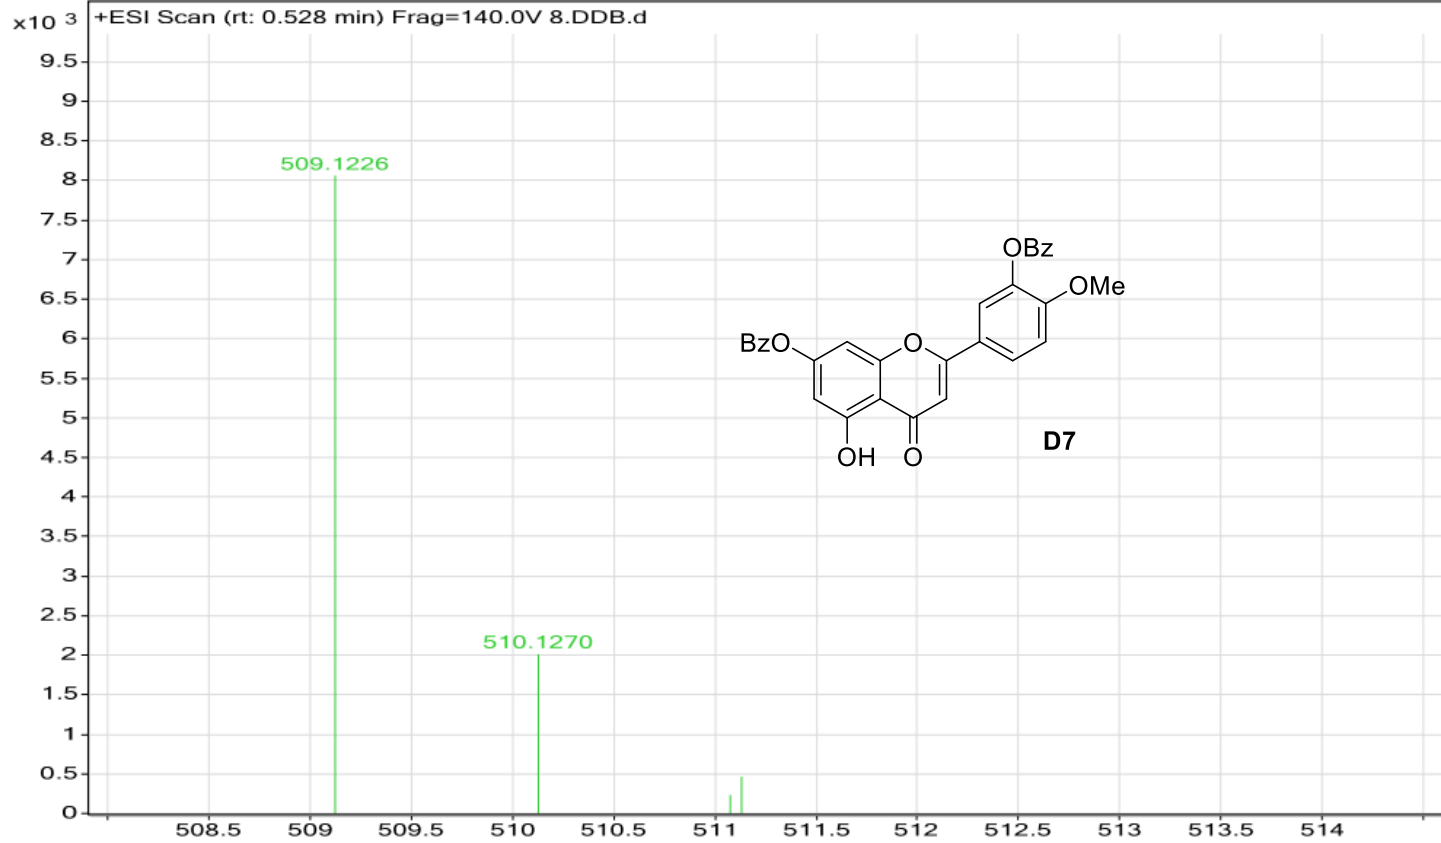

# <sup>1</sup>H-NMR

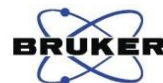

DDB-DMSO-1H

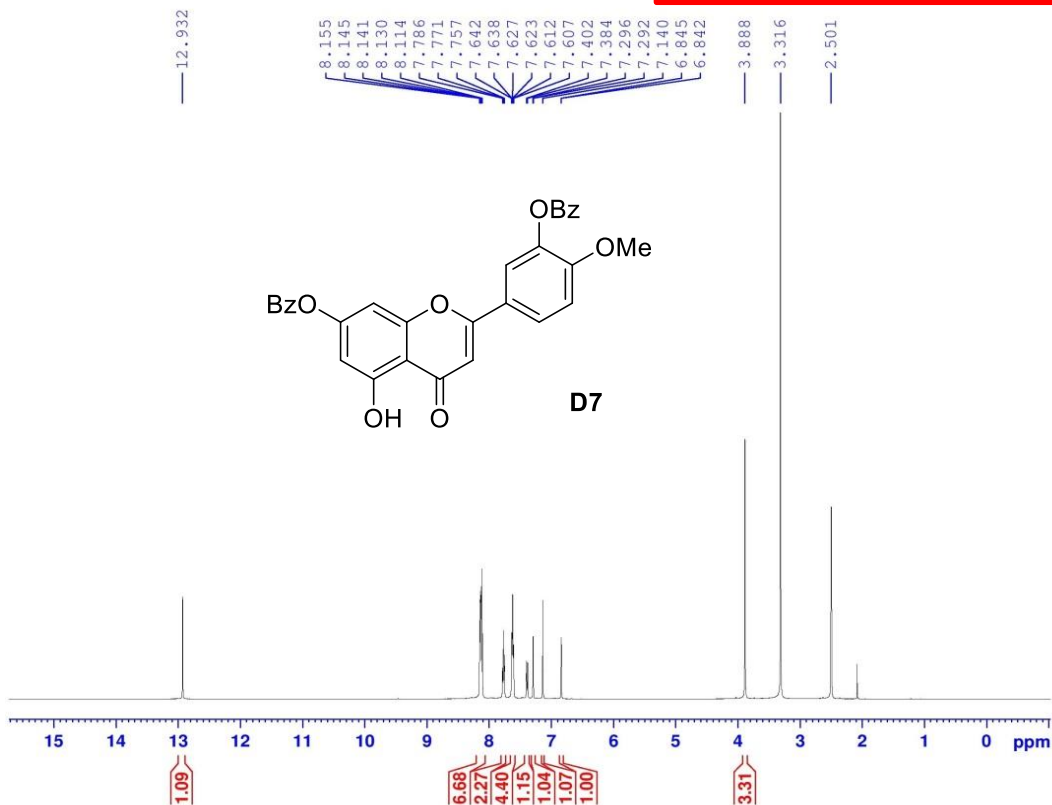

Current Data Parameters  
NAME 110HUAN\_HD3  
EXPNO 1  
PROCNO 1

F2 - Acquisition Parameters  
Date\_ 20190129  
Time 11.51  
INSTRUM spect  
PROBHD 5 mm PABBO BB/  
PULPROG zg30  
TD 65536  
SOLVENT DMSO  
NS 16  
DS 2  
SWH 10000.000 Hz  
FIDRES 0.152588 Hz  
AQ 3.2767999 sec  
RG 127.68  
DW 50.000 usec  
DE 6.50 usec  
TE 301.6 K  
D1 1.0000000 sec  
TD0 1

===== CHANNEL f1 =====  
SF01 500.2030889 MHz  
NUC1 1H  
P1 10.00 usec  
PLW1 22.00000000 W

F2 - Processing parameters  
SI 65536  
SF 500.2000036 MHz  
WDW EM  
SSB 0  
LB 0.30 Hz  
GB 0  
PC 1.00

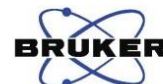

DDB-DMSO-1H

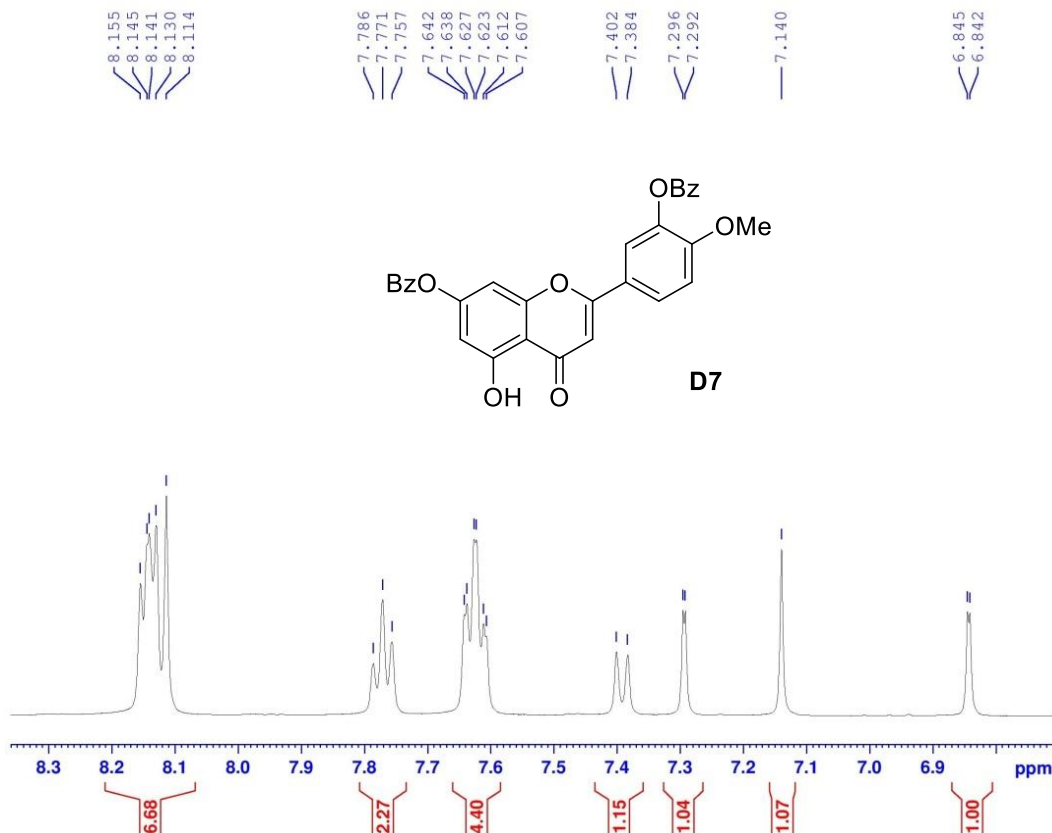

Current Data Parameters  
NAME 110HUAN\_HD3  
EXPNO 1  
PROCNO 1

F2 - Acquisition Parameters  
Date\_ 20190129  
Time 11.51  
INSTRUM spect  
PROBHD 5 mm PABBO BB/  
PULPROG zg30  
TD 65536  
SOLVENT DMSO  
NS 16  
DS 2  
SWH 10000.000 Hz  
FIDRES 0.152588 Hz  
AQ 3.2767999 sec  
RG 127.68  
DW 50.000 usec  
DE 6.50 usec  
TE 301.6 K  
D1 1.0000000 sec  
TD0 1

===== CHANNEL f1 =====  
SF01 500.2030889 MHz  
NUC1 1H  
P1 10.00 usec  
PLW1 22.00000000 W

F2 - Processing parameters  
SI 65536  
SF 500.2000036 MHz  
WDW EM  
SSB 0  
LB 0.30 Hz  
GB 0  
PC 1.00

DDB-DMSO-C13CPD

**$^{13}\text{C}$ -NMR**

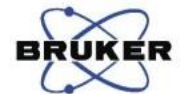

182.41  
163.85  
163.74  
163.28  
160.78  
156.15  
155.80  
154.36  
139.66  
134.31  
134.19  
129.88  
129.82  
129.02  
128.99  
128.34  
128.31  
126.24  
122.78  
121.59  
113.30  
108.21  
105.36  
104.64  
101.76

56.35  
40.00  
39.83  
39.67  
39.50  
39.33  
39.16  
39.00

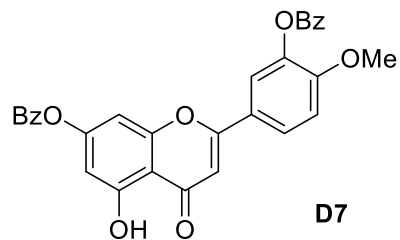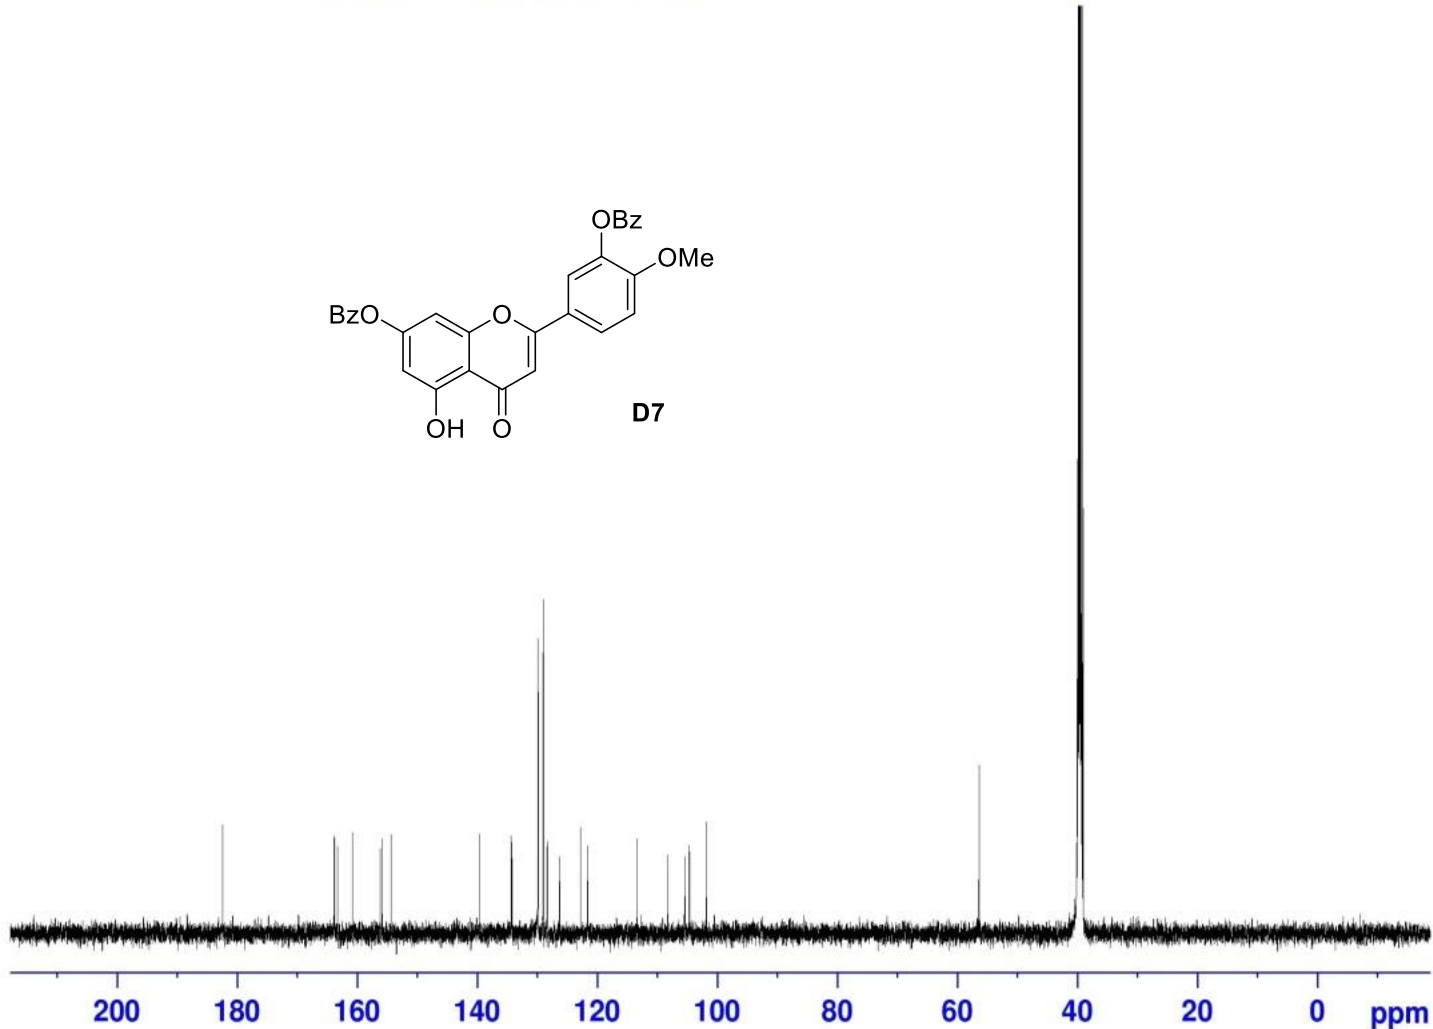

Current Data Parameters  
NAME 110HUAN\_HD3  
EXPNO 2  
PROCNO 1

F2 - Acquisition Parameters  
Date\_ 20190129  
Time 12.35  
INSTRUM spect  
PROBHD 5 mm PABBO BB/  
PULPROG zgpg30  
TD 65536  
SOLVENT DMSO  
NS 256  
DS 4  
SWH 29761.904 Hz  
FIDRES 0.454131 Hz  
AQ 1.1010048 sec  
RG 198.57  
DW 16.800 usec  
DE 6.50 usec  
TE 302.3 K  
D1 2.0000000 sec  
D11 0.0300000 sec  
TD0 1

==== CHANNEL f1 =====  
SFO1 125.7879670 MHz  
NUC1 13C  
P1 10.00 usec  
PLW1 88.0000000 W

==== CHANNEL f2 =====  
SFO2 500.2020008 MHz  
NUC2 1H  
CPDPRG[2] waltz16  
PCPD2 80.00 usec  
PLW2 22.0000000 W  
PLW12 0.34375000 W  
PLW13 0.22000000 W

F2 - Processing parameters  
SI 32768  
SF 125.7754559 MHz  
WDW EM  
SSB 0  
LB 1.00 Hz  
GB 0  
PC 1.40



## Reference

1. Tran, T.-S.; Le, M.-T.; Tran, T.-D.; Tran, T.-H.; Thai, K.-M. Design of Curcumin and Flavonoid Derivatives with Acetylcholinesterase and Beta-Secretase Inhibitory Activities Using in Silico Approaches. *Molecules* **2020**, *25*, 3644.
2. Wildman, S.A.; Crippen, G.M. Prediction of Physicochemical Parameters by Atomic Contributions. *J Chem Inf Comput Sci* **1999**, *39*, 868-873, doi:10.1021/ci990307l.
3. Oprea, T.I. Property distribution of drug-related chemical databases. *Journal of computer-aided molecular design* **2000**, *14*, 251-264, doi:10.1023/a:1008130001697.
4. Neumann, U.; Ufer, M.; Jacobson, L.H.; Rouzade-Dominguez, M.-L.; Huledal, G.; Kolly, C.; Lüönd, R.M.; Machauer, R.; Veenstra, S.J.; Hurth, K., et al. The BACE-1 inhibitor CNP520 for prevention trials in Alzheimer's disease. *EMBO Mol Med* **2018**, *10*, e9316, doi:10.15252/emmm.201809316.
